# Supplementary material for: Monitoring, modeling, and forecasting long-term changes in coastal seawater quality due to climate change
Source: Research Square preprint supplement (doi:10.21203/rs.3.rs-3284841/v1), 2023-12-07
Supplement: Supplementary file 1 [file 5f62c05f152f7e488cbff4f2.xlsx]

## Sheet: Catalogue
Derived data from CMIP6
Table SF1 Monthly surface sea temperature from 2015 to 2099 (℃)
Table SF2 Monthly wet deposition from 2015 to 2099 (℃)
Table SF3 Monthly pCO2 from 2015 to 2099 (℃)
Predictions based on receptor model calculations
Table SF4 Monthly Fe concentration from 2015 to 2099 (mg L-1)
Table SF5 Monthly Cu concentration from 2015 to 2099 (mg L-1)
Table SF6 Monthly Pb concentration from 2015 to 2099 (mg L-1)
Table SF7 Monthly Cr concentration from 2015 to 2099 (mg L-1)
Table SF8 Monthly BOD concentration from 2015 to 2099 (mg L-1)
Table SF9 Monthly COD concentration from 2015 to 2099 (mg L-1)
Table SF10 Monthly NH4+-N concentration from 2015 to 2099 (mg L-1)
Table SF11 Monthly NO3- concentration from 2015 to 2099 (mg L-1)
Table SF12 Monthly TN concentration from 2015 to 2099 (mg L-1)
Table SF13 Monthly TP concentration from 2015 to 2099 (mg L-1)

## Sheet: Table SF1
Time	East Coast	Pearl River Delta	West Coast
2015-01-16	22.153	21.9636	22.153
2015-02-15	21.9958	21.9504	21.9958
2015-03-16	22.2383	22.8836	22.2383
2015-04-16	24.8615	25.3092	24.8615
2015-05-16	27.0034	27.5007	27.0034
2015-06-16	29.3541	29.4205	29.3541
2015-07-16	29.5249	30.1334	29.5249
2015-08-16	29.0779	29.8567	29.0779
2015-09-16	28.7577	29.7461	28.7577
2015-10-16	27.2036	27.7351	27.2036
2015-11-16	25.1863	24.8782	25.1863
2015-12-16	23.6849	23.5152	23.6849
2016-01-16	23.1851	23.0099	23.1851
2016-02-15	23.0062	22.9868	23.0062
2016-03-15	23.8251	23.9441	23.8251
2016-04-15	25.5958	25.8499	25.5958
2016-05-15	27.8347	27.4736	27.8347
2016-06-15	29.1023	29.0778	29.1023
2016-07-15	30.1433	30.8297	30.1433
2016-08-15	30.1379	30.5148	30.1379
2016-09-15	29.0309	29.6222	29.0309
2016-10-15	28.172	28.3114	28.172
2016-11-15	26.5982	26.6932	26.5982
2016-12-15	25.2348	25.1307	25.2348
2017-01-15	23.5199	23.3946	23.5199
2017-02-14	23.9851	24.1017	23.9851
2017-03-15	24.5913	24.5542	24.5913
2017-04-15	26.678	26.5991	26.678
2017-05-15	28.8884	29.1266	28.8884
2017-06-15	29.9894	30.5175	29.9894
2017-07-15	29.502	30.762	29.502
2017-08-15	30.7122	31.6388	30.7122
2017-09-15	30.0699	31.251	30.0699
2017-10-15	27.9125	28.6735	27.9125
2017-11-15	26.4695	26.9668	26.4695
2017-12-15	24.2299	23.9699	24.2299
2018-01-15	22.7702	22.3493	22.7702
2018-02-14	22.5961	22.6827	22.5961
2018-03-15	23.3461	23.4655	23.3461
2018-04-15	24.5735	24.762	24.5735
2018-05-15	27.7357	27.5854	27.7357
2018-06-15	29.5101	29.547	29.5101
2018-07-15	29.5519	29.8335	29.5519
2018-08-15	28.7506	29.5941	28.7506
2018-09-15	28.4058	29.6722	28.4058
2018-10-15	27.7791	28.4875	27.7791
2018-11-15	26.1673	26.0669	26.1673
2018-12-15	24.4118	24.059	24.4118
2019-01-15	22.9453	22.6374	22.9453
2019-02-14	22.406	22.3869	22.406
2019-03-15	23.9568	24.2391	23.9568
2019-04-15	26.5269	26.5822	26.5269
2019-05-15	28.5048	28.8859	28.5048
2019-06-15	29.2184	29.6538	29.2184
2019-07-15	29.5809	29.7775	29.5809
2019-08-15	29.8528	30.0122	29.8528
2019-09-15	29.2361	30.0173	29.2361
2019-10-15	27.7259	28.2957	27.7259
2019-11-15	25.5335	25.4629	25.5335
2019-12-15	23.4699	23.0367	23.4699
2020-01-15	21.5218	21.1898	21.5218
2020-02-14	21.3244	21.3966	21.3244
2020-03-14	22.7561	23.1897	22.7561
2020-04-14	25.469	26.0119	25.469
2020-05-14	27.9738	28.3952	27.9738
2020-06-14	30.0887	30.0845	30.0887
2020-07-14	29.5166	30.5535	29.5166
2020-08-14	29.9438	30.4737	29.9438
2020-09-14	29.7766	30.6001	29.7766
2020-10-14	28.9126	29.7446	28.9126
2020-11-14	26.4944	26.5537	26.4944
2020-12-14	24.6003	24.2809	24.6003
2021-01-14	22.1788	21.5891	22.1788
2021-02-13	21.6056	21.333	21.6056
2021-03-14	23.4562	23.6824	23.4562
2021-04-14	26.1354	26.2178	26.1354
2021-05-14	28.5429	28.2163	28.5429
2021-06-14	29.669	29.5925	29.669
2021-07-14	29.5779	30.5257	29.5779
2021-08-14	30.0586	30.8362	30.0586
2021-09-14	29.2164	30.3877	29.2164
2021-10-14	28.2709	29.0367	28.2709
2021-11-14	26.5763	26.9368	26.5763
2021-12-14	23.9779	23.6822	23.9779
2022-01-14	22.771	22.3184	22.771
2022-02-13	23.7524	23.3252	23.7524
2022-03-14	26.138	25.6713	26.138
2022-04-14	28.0283	27.7533	28.0283
2022-05-14	29.7581	29.608	29.7581
2022-06-14	30.8676	30.9126	30.8676
2022-07-14	31.0371	31.4254	31.0371
2022-08-14	30.7962	31.1357	30.7962
2022-09-14	29.9146	30.3813	29.9146
2022-10-14	28.9015	28.7467	28.9015
2022-11-14	26.215	25.9752	26.215
2022-12-14	24.6955	24.5012	24.6955
2023-01-14	23.0554	22.7325	23.0554
2023-02-13	23.0552	23.1821	23.0552
2023-03-14	24.5739	24.7921	24.5739
2023-04-14	27.2801	26.8263	27.2801
2023-05-14	28.9799	28.9518	28.9799
2023-06-14	29.7809	30.6188	29.7809
2023-07-14	30.1494	30.6049	30.1494
2023-08-14	30.3822	30.8922	30.3822
2023-09-14	29.1382	29.3216	29.1382
2023-10-14	27.4461	27.6127	27.4461
2023-11-14	26.6981	26.7109	26.6981
2023-12-14	24.5066	23.7432	24.5066
2024-01-14	22.3613	21.6212	22.3613
2024-02-13	22.0086	21.9252	22.0086
2024-03-13	23.9642	24.3873	23.9642
2024-04-13	25.8667	26.4422	25.8667
2024-05-13	28.5439	28.9261	28.5439
2024-06-13	29.3745	29.6381	29.3745
2024-07-13	29.938	30.194	29.938
2024-08-13	30.2203	30.5114	30.2203
2024-09-13	29.5476	29.7855	29.5476
2024-10-13	27.8732	27.8596	27.8732
2024-11-13	26.1782	26.0095	26.1782
2024-12-13	24.4761	24.264	24.4761
2025-01-13	23.4199	23.219	23.4199
2025-02-12	23.03	22.8162	23.03
2025-03-13	23.0335	23.0112	23.0335
2025-04-13	24.9716	25.1807	24.9716
2025-05-13	27.374	27.2975	27.374
2025-06-13	29.2631	29.5701	29.2631
2025-07-13	30.1746	30.4037	30.1746
2025-08-13	29.6021	30.3636	29.6021
2025-09-13	29.7649	30.3776	29.7649
2025-10-13	27.0061	27.1993	27.0061
2025-11-13	26.104	26.5628	26.104
2025-12-13	24.9608	25.1204	24.9608
2026-01-13	24.4949	24.7407	24.4949
2026-02-12	23.8631	24.1771	23.8631
2026-03-13	24.2489	24.6577	24.2489
2026-04-13	26.124	26.2696	26.124
2026-05-13	27.791	28.2843	27.791
2026-06-13	29.6354	30.605	29.6354
2026-07-13	29.862	30.9526	29.862
2026-08-13	29.6732	30.79	29.6732
2026-09-13	29.5815	30.3529	29.5815
2026-10-13	27.9518	28.1316	27.9518
2026-11-13	26.8674	26.7336	26.8674
2026-12-13	24.963	24.3776	24.963
2027-01-13	23.3168	23.1885	23.3168
2027-02-12	24.1391	24.3261	24.1391
2027-03-13	25.3144	25.5687	25.3144
2027-04-13	26.7595	26.9897	26.7595
2027-05-13	28.9364	28.854	28.9364
2027-06-13	30.1349	30.6978	30.1349
2027-07-13	29.6363	30.8073	29.6363
2027-08-13	30.2887	30.7154	30.2887
2027-09-13	30.4807	30.5749	30.4807
2027-10-13	28.403	28.5181	28.403
2027-11-13	27.1222	27.5475	27.1222
2027-12-13	25.2597	24.9037	25.2597
2028-01-13	23.1738	22.7192	23.1738
2028-02-12	22.9123	22.9134	22.9123
2028-03-12	24.524	24.1467	24.524
2028-04-12	26.6167	26.1562	26.6167
2028-05-12	28.5178	28.289	28.5178
2028-06-12	29.9835	30.0113	29.9835
2028-07-12	30.6028	31.258	30.6028
2028-08-12	30.836	31.5966	30.836
2028-09-12	30.035	30.7362	30.035
2028-10-12	29.0801	29.7217	29.0801
2028-11-12	27.0455	26.9221	27.0455
2028-12-12	24.9526	24.6129	24.9526
2029-01-12	23.3348	22.8484	23.3348
2029-02-11	22.7979	22.5904	22.7979
2029-03-12	24.3574	24.0032	24.3574
2029-04-12	27.2372	26.5897	27.2372
2029-05-12	29.2014	28.3939	29.2014
2029-06-12	30.4628	30.3847	30.4628
2029-07-12	31.3304	31.1669	31.3304
2029-08-12	31.1266	31.3311	31.1266
2029-09-12	30.4842	30.5454	30.4842
2029-10-12	29.3795	29.4596	29.3795
2029-11-12	27.2021	26.7426	27.2021
2029-12-12	24.9868	24.4726	24.9868
2030-01-12	23.9418	23.6158	23.9418
2030-02-11	23.2251	23.2888	23.2251
2030-03-12	24.0043	24.6353	24.0043
2030-04-12	25.873	26.4157	25.873
2030-05-12	28.6489	28.6103	28.6489
2030-06-12	30.4009	30.346	30.4009
2030-07-12	29.9888	30.3001	29.9888
2030-08-12	30.3686	30.6784	30.3686
2030-09-12	30.4714	31.0148	30.4714
2030-10-12	29.2834	29.7727	29.2834
2030-11-12	26.6445	26.161	26.6445
2030-12-12	24.6912	24.0308	24.6912
2031-01-12	23.5133	23.0705	23.5133
2031-02-11	22.7616	22.4664	22.7616
2031-03-12	23.6125	23.8323	23.6125
2031-04-12	25.5912	26.0839	25.5912
2031-05-12	27.3707	27.9661	27.3707
2031-06-12	28.8628	29.0868	28.8628
2031-07-12	29.1681	29.9393	29.1681
2031-08-12	30.2341	30.2908	30.2341
2031-09-12	29.3701	29.8534	29.3701
2031-10-12	28.0788	28.1221	28.0788
2031-11-12	26.8657	26.6832	26.8657
2031-12-12	24.5969	24.1039	24.5969
2032-01-12	23.9894	23.5144	23.9894
2032-02-11	23.4954	23.5648	23.4954
2032-03-11	23.8142	24.0166	23.8142
2032-04-11	26.5745	26.5956	26.5745
2032-05-11	28.761	28.9331	28.761
2032-06-11	29.9437	30.0263	29.9437
2032-07-11	30.3657	30.52	30.3657
2032-08-11	30.6056	31.2196	30.6056
2032-09-11	30.1587	30.7225	30.1587
2032-10-11	28.3919	29.1327	28.3919
2032-11-11	26.6857	26.9009	26.6857
2032-12-11	24.7613	24.5589	24.7613
2033-01-11	23.0927	22.9687	23.0927
2033-02-10	23.3315	23.4023	23.3315
2033-03-11	25.5465	25.1018	25.5465
2033-04-11	26.9197	26.672	26.9197
2033-05-11	28.9813	28.8958	28.9813
2033-06-11	29.7902	30.2917	29.7902
2033-07-11	31.2484	32.3275	31.2484
2033-08-11	30.6946	31.4992	30.6946
2033-09-11	30.1597	31.2068	30.1597
2033-10-11	28.4775	29.2277	28.4775
2033-11-11	26.5941	26.895	26.5941
2033-12-11	25.574	25.6289	25.574
2034-01-11	24.0015	23.8819	24.0015
2034-02-10	23.4157	23.2592	23.4157
2034-03-11	24.7487	24.7038	24.7487
2034-04-11	26.6435	27.2812	26.6435
2034-05-11	29.2248	29.2781	29.2248
2034-06-11	30.06	30.5377	30.06
2034-07-11	29.4408	30.6483	29.4408
2034-08-11	29.4638	30.7075	29.4638
2034-09-11	29.8968	30.3412	29.8968
2034-10-11	28.6033	28.5074	28.6033
2034-11-11	27.2403	27.3785	27.2403
2034-12-11	24.7125	24.5561	24.7125
2035-01-11	23.2513	23.1463	23.2513
2035-02-10	23.7243	23.6741	23.7243
2035-03-11	24.2186	24.5517	24.2186
2035-04-11	26.4641	26.7919	26.4641
2035-05-11	28.6076	29.0158	28.6076
2035-06-11	29.7865	30.5824	29.7865
2035-07-11	30.4498	31.2285	30.4498
2035-08-11	30.6905	31.6726	30.6905
2035-09-11	30.0864	30.4286	30.0864
2035-10-11	28.7875	29.1041	28.7875
2035-11-11	26.4951	26.4628	26.4951
2035-12-11	24.4221	24.0025	24.4221
2036-01-11	23.3779	23.1955	23.3779
2036-02-10	23.0105	23.1642	23.0105
2036-03-10	23.9045	24.2211	23.9045
2036-04-10	26.7536	26.8994	26.7536
2036-05-10	29.0467	29.4782	29.0467
2036-06-10	28.9303	30.1318	28.9303
2036-07-10	30.1641	31.0118	30.1641
2036-08-10	30.7376	31.3927	30.7376
2036-09-10	30.8075	31.3438	30.8075
2036-10-10	28.5331	28.8667	28.5331
2036-11-10	26.7982	27.0615	26.7982
2036-12-10	24.9285	24.9674	24.9285
2037-01-10	23.5503	23.432	23.5503
2037-02-09	22.904	22.9269	22.904
2037-03-10	24.689	24.7535	24.689
2037-04-10	27.417	27.3569	27.417
2037-05-10	29.2003	28.8499	29.2003
2037-06-10	29.6691	30.3069	29.6691
2037-07-10	30.2797	30.8387	30.2797
2037-08-10	31.1485	31.2125	31.1485
2037-09-10	30.2538	30.6815	30.2538
2037-10-10	28.654	29.007	28.654
2037-11-10	27.3834	27.6344	27.3834
2037-12-10	25.4845	25.619	25.4845
2038-01-10	23.7319	23.6088	23.7319
2038-02-09	23.2932	23.248	23.2932
2038-03-10	25.2332	25.1291	25.2332
2038-04-10	27.2071	26.7792	27.2071
2038-05-10	29.3507	29.262	29.3507
2038-06-10	30.7122	30.8063	30.7122
2038-07-10	30.1659	31.6091	30.1659
2038-08-10	30.753	30.7864	30.753
2038-09-10	30.2354	30.9724	30.2354
2038-10-10	28.0974	28.0442	28.0974
2038-11-10	26.4158	26.083	26.4158
2038-12-10	24.8473	24.3809	24.8473
2039-01-10	23.4079	23.2497	23.4079
2039-02-09	23.4733	23.5728	23.4733
2039-03-10	24.3569	24.8441	24.3569
2039-04-10	26.2741	26.5642	26.2741
2039-05-10	28.17	28.4388	28.17
2039-06-10	30.3451	30.6014	30.3451
2039-07-10	30.4877	30.8657	30.4877
2039-08-10	30.2643	30.9255	30.2643
2039-09-10	29.6117	30.5435	29.6117
2039-10-10	28.0012	28.1702	28.0012
2039-11-10	26.1996	25.9486	26.1996
2039-12-10	25.1371	25.0619	25.1371
2040-01-10	22.9809	22.5685	22.9809
2040-02-09	22.2867	22.3574	22.2867
2040-03-09	23.6305	23.938	23.6305
2040-04-09	26.2442	27.0041	26.2442
2040-05-09	26.9887	28.066	26.9887
2040-06-09	28.6733	29.5449	28.6733
2040-07-09	28.6655	29.4123	28.6655
2040-08-09	29.4068	30.399	29.4068
2040-09-09	29.509	30.5956	29.509
2040-10-09	28.121	28.8578	28.121
2040-11-09	27.2059	27.4962	27.2059
2040-12-09	25.3101	25.2317	25.3101
2041-01-09	23.404	23.322	23.404
2041-02-08	22.8412	22.8923	22.8412
2041-03-09	24.0792	24.6943	24.0792
2041-04-09	25.6526	26.0806	25.6526
2041-05-09	27.6339	27.6439	27.6339
2041-06-09	29.1471	29.626	29.1471
2041-07-09	30.2899	30.7843	30.2899
2041-08-09	30.1414	30.9119	30.1414
2041-09-09	29.6301	30.5726	29.6301
2041-10-09	27.7353	28.4161	27.7353
2041-11-09	26.3368	26.3298	26.3368
2041-12-09	24.7073	24.533	24.7073
2042-01-09	24.4879	24.3547	24.4879
2042-02-08	24.4144	24.3655	24.4144
2042-03-09	24.973	25.4542	24.973
2042-04-09	26.9608	27.0604	26.9608
2042-05-09	28.2814	28.6592	28.2814
2042-06-09	30.2895	30.5521	30.2895
2042-07-09	31.353	31.4948	31.353
2042-08-09	30.968	31.0209	30.968
2042-09-09	30.2229	30.5269	30.2229
2042-10-09	29.2481	29.4836	29.2481
2042-11-09	26.8622	26.701	26.8622
2042-12-09	25.0752	24.6578	25.0752
2043-01-09	23.8383	23.5511	23.8383
2043-02-08	23.8738	23.8209	23.8738
2043-03-09	25.7906	25.4284	25.7906
2043-04-09	28.2578	27.7844	28.2578
2043-05-09	29.806	29.4664	29.806
2043-06-09	30.4523	30.6033	30.4523
2043-07-09	30.6493	31.8771	30.6493
2043-08-09	30.8335	31.1071	30.8335
2043-09-09	30.4624	30.9806	30.4624
2043-10-09	29.0493	28.7556	29.0493
2043-11-09	27.6455	27.195	27.6455
2043-12-09	25.9711	25.3318	25.9711
2044-01-09	24.9269	24.4982	24.9269
2044-02-08	25.0514	25.3206	25.0514
2044-03-08	25.5415	25.9617	25.5415
2044-04-08	27.3611	27.3299	27.3611
2044-05-08	29.9608	29.8713	29.9608
2044-06-08	31.05	31.4627	31.05
2044-07-08	30.8851	31.2193	30.8851
2044-08-08	30.6187	30.9721	30.6187
2044-09-08	29.8813	30.6446	29.8813
2044-10-08	28.6482	29.4246	28.6482
2044-11-08	27.1947	26.871	27.1947
2044-12-08	25.3753	24.9849	25.3753
2045-01-08	24.3697	24.0251	24.3697
2045-02-07	23.9782	24.0823	23.9782
2045-03-08	24.498	24.9757	24.498
2045-04-08	26.2067	26.9777	26.2067
2045-05-08	28.2783	28.9729	28.2783
2045-06-08	28.8774	29.6133	28.8774
2045-07-08	29.2652	30.2033	29.2652
2045-08-08	30.2299	31.017	30.2299
2045-09-08	29.6638	30.2046	29.6638
2045-10-08	27.6546	27.9542	27.6546
2045-11-08	26.5615	26.8389	26.5615
2045-12-08	23.5311	23.2809	23.5311
2046-01-08	22.4177	22.41	22.4177
2046-02-07	22.5205	22.6415	22.5205
2046-03-08	24.2158	24.2036	24.2158
2046-04-08	26.1699	26.2052	26.1699
2046-05-08	28.8977	28.4317	28.8977
2046-06-08	30.0633	29.8798	30.0633
2046-07-08	30.611	31.3409	30.611
2046-08-08	31.0027	31.3026	31.0027
2046-09-08	30.818	31.5784	30.818
2046-10-08	29.4868	29.7898	29.4868
2046-11-08	27.2149	27.404	27.2149
2046-12-08	25.3478	25.2416	25.3478
2047-01-08	24.4315	24.2841	24.4315
2047-02-07	24.0458	23.8487	24.0458
2047-03-08	25.8563	25.6562	25.8563
2047-04-08	27.4079	27.0596	27.4079
2047-05-08	29.292	29.0464	29.292
2047-06-08	30.5077	30.8491	30.5077
2047-07-08	30.7753	31.3389	30.7753
2047-08-08	30.7638	31.0249	30.7638
2047-09-08	30.3841	31.2487	30.3841
2047-10-08	29.5888	29.4498	29.5888
2047-11-08	26.9694	26.8207	26.9694
2047-12-08	24.5118	24.07	24.5118
2048-01-08	23.2367	22.8554	23.2367
2048-02-07	23.1453	23.0281	23.1453
2048-03-07	25.83	25.6934	25.83
2048-04-07	27.4978	27.3867	27.4978
2048-05-07	29.1288	29.2316	29.1288
2048-06-07	31.1935	31.2686	31.1935
2048-07-07	31.4932	31.9196	31.4932
2048-08-07	30.9706	31.3656	30.9706
2048-09-07	30.4733	31.1609	30.4733
2048-10-07	29.4071	30.1396	29.4071
2048-11-07	28.1697	28.5905	28.1697
2048-12-07	26.4097	26.3482	26.4097
2049-01-07	23.7638	23.2179	23.7638
2049-02-06	23.0137	22.7869	23.0137
2049-03-07	24.8006	24.9506	24.8006
2049-04-07	25.3625	25.5508	25.3625
2049-05-07	29.0478	28.796	29.0478
2049-06-07	29.9097	30.5249	29.9097
2049-07-07	30.2154	30.6568	30.2154
2049-08-07	29.7996	30.0672	29.7996
2049-09-07	29.8904	30.4487	29.8904
2049-10-07	27.9928	28.3442	27.9928
2049-11-07	27.372	27.3867	27.372
2049-12-07	23.9321	23.3158	23.9321
2050-01-07	22.9664	22.7208	22.9664
2050-02-06	22.7016	22.8227	22.7016
2050-03-07	23.8448	24.3389	23.8448
2050-04-07	25.9771	26.6017	25.9771
2050-05-07	28.4616	28.9981	28.4616
2050-06-07	29.8217	30.2449	29.8217
2050-07-07	30.9737	31.7248	30.9737
2050-08-07	30.8518	31.4891	30.8518
2050-09-07	30.3861	30.6596	30.3861
2050-10-07	28.119	28.6518	28.119
2050-11-07	27.3751	27.473	27.3751
2050-12-07	25.2744	24.6925	25.2744
2051-01-07 12:00:00	23.7356	23.3283	23.7356
2051-02-06	23.9523	23.8746	23.9523
2051-03-07 12:00:00	25.6619	25.3064	25.6619
2051-04-07	27.7915	27.2693	27.7915
2051-05-07 12:00:00	29.2652	29.1367	29.2652
2051-06-07	30.4474	30.7159	30.4474
2051-07-07 12:00:00	31.2461	31.8946	31.2461
2051-08-07 12:00:00	30.4272	31.0954	30.4272
2051-09-07	29.6342	30.1529	29.6342
2051-10-07 12:00:00	29.2942	30.0381	29.2942
2051-11-07	27.6753	28.0959	27.6753
2051-12-07 12:00:00	25.2319	24.7803	25.2319
2052-01-07 12:00:00	24.4364	24.1933	24.4364
2052-02-06	23.726	23.7021	23.726
2052-03-06 12:00:00	24.0936	24.2295	24.0936
2052-04-06	26.6816	26.641	26.6816
2052-05-06 12:00:00	29.0706	28.7522	29.0706
2052-06-06	30.54	31.0037	30.54
2052-07-06 12:00:00	31.7127	32.4155	31.7127
2052-08-06 12:00:00	31.157	31.672	31.157
2052-09-06	30.3618	30.4331	30.3618
2052-10-06 12:00:00	28.7844	29.2324	28.7844
2052-11-06	28.1196	28.4302	28.1196
2052-12-06 12:00:00	26.0346	26.0361	26.0346
2053-01-06 12:00:00	24.2438	24.0691	24.2438
2053-02-05	24.5806	24.642	24.5806
2053-03-06 12:00:00	25.7358	25.8496	25.7358
2053-04-06	28.2006	28.2178	28.2006
2053-05-06 12:00:00	29.0368	29.4664	29.0368
2053-06-06	30.4636	30.9832	30.4636
2053-07-06 12:00:00	32.1315	32.333	32.1315
2053-08-06 12:00:00	31.7527	32.1164	31.7527
2053-09-06	31.5706	31.8339	31.5706
2053-10-06 12:00:00	29.5034	29.6793	29.5034
2053-11-06	27.0649	26.6209	27.0649
2053-12-06 12:00:00	26.6343	26.0612	26.6343
2054-01-06 12:00:00	25.8534	25.3308	25.8534
2054-02-05	24.7714	24.3063	24.7714
2054-03-06 12:00:00	24.9723	25.2508	24.9723
2054-04-06	27.0525	27.2424	27.0525
2054-05-06 12:00:00	28.928	29.0323	28.928
2054-06-06	29.8307	30.083	29.8307
2054-07-06 12:00:00	30.2742	31.3116	30.2742
2054-08-06 12:00:00	30.5023	31.3418	30.5023
2054-09-06	29.6893	30.7657	29.6893
2054-10-06 12:00:00	28.9639	29.3553	28.9639
2054-11-06	27.3269	27.3828	27.3269
2054-12-06 12:00:00	26.0865	25.642	26.0865
2055-01-06 12:00:00	24.1583	23.6702	24.1583
2055-02-05	23.9496	23.8411	23.9496
2055-03-06 12:00:00	24.263	24.3842	24.263
2055-04-06	26.4554	26.5869	26.4554
2055-05-06 12:00:00	28.0752	28.7357	28.0752
2055-06-06	29.4277	29.9527	29.4277
2055-07-06 12:00:00	30.4192	31.1125	30.4192
2055-08-06 12:00:00	30.4848	31.2524	30.4848
2055-09-06	30.0821	31.2162	30.0821
2055-10-06 12:00:00	28.476	29.0861	28.476
2055-11-06	26.9429	27.1564	26.9429
2055-12-06 12:00:00	24.7564	24.5265	24.7564
2056-01-06 12:00:00	24.1168	23.8395	24.1168
2056-02-05	23.882	23.8318	23.882
2056-03-05 12:00:00	24.5614	24.7334	24.5614
2056-04-05	26.5018	26.6134	26.5018
2056-05-05 12:00:00	29.1742	29.0177	29.1742
2056-06-05	30.134	30.6528	30.134
2056-07-05 12:00:00	32.0543	32.381	32.0543
2056-08-05 12:00:00	31.4428	31.7009	31.4428
2056-09-05	30.7092	31.5603	30.7092
2056-10-05 12:00:00	28.9828	30.0536	28.9828
2056-11-05	27.2175	27.8614	27.2175
2056-12-05 12:00:00	26.1892	26.3133	26.1892
2057-01-05 12:00:00	23.2635	22.9345	23.2635
2057-02-04	23.1956	23.0594	23.1956
2057-03-05 12:00:00	25.116	25.7853	25.116
2057-04-05	28.1412	28.0948	28.1412
2057-05-05 12:00:00	29.0831	29.3698	29.0831
2057-06-05	30.8221	31.0085	30.8221
2057-07-05 12:00:00	32.1569	32.5766	32.1569
2057-08-05 12:00:00	30.8852	31.5558	30.8852
2057-09-05	29.9982	30.6294	29.9982
2057-10-05 12:00:00	28.9062	29.4378	28.9062
2057-11-05	27.4532	27.5714	27.4532
2057-12-05 12:00:00	25.6993	25.5126	25.6993
2058-01-05 12:00:00	24.2245	24.0122	24.2245
2058-02-04	24.3486	24.2927	24.3486
2058-03-05 12:00:00	25.4288	25.472	25.4288
2058-04-05	27.0253	27.0718	27.0253
2058-05-05 12:00:00	28.9443	29.3296	28.9443
2058-06-05	30.5957	31.2754	30.5957
2058-07-05 12:00:00	30.5984	31.3904	30.5984
2058-08-05 12:00:00	31.9781	32.0436	31.9781
2058-09-05	30.6612	31.2855	30.6612
2058-10-05 12:00:00	28.8146	29.1044	28.8146
2058-11-05	27.3168	27.0985	27.3168
2058-12-05 12:00:00	25.4659	25.2285	25.4659
2059-01-05 12:00:00	23.7523	23.666	23.7523
2059-02-04	23.8364	23.8651	23.8364
2059-03-05 12:00:00	24.9999	25.2679	24.9999
2059-04-05	26.58	27.3233	26.58
2059-05-05 12:00:00	28.8202	29.1699	28.8202
2059-06-05	30.1602	30.7765	30.1602
2059-07-05 12:00:00	30.7679	31.2307	30.7679
2059-08-05 12:00:00	30.585	31.4996	30.585
2059-09-05	30.3608	31.067	30.3608
2059-10-05 12:00:00	29.3168	30.1707	29.3168
2059-11-05	28.0355	28.3157	28.0355
2059-12-05 12:00:00	25.4737	25.3569	25.4737
2060-01-05 12:00:00	23.9033	23.8366	23.9033
2060-02-04	23.5324	23.6665	23.5324
2060-03-04 12:00:00	24.493	25.0939	24.493
2060-04-04	27.152	27.0232	27.152
2060-05-04 12:00:00	29.0545	28.7809	29.0545
2060-06-04	30.3433	30.8073	30.3433
2060-07-04 12:00:00	31.081	31.6104	31.081
2060-08-04 12:00:00	31.4706	31.7295	31.4706
2060-09-04	30.0357	31.0307	30.0357
2060-10-04 12:00:00	29.227	30.2183	29.227
2060-11-04	27.161	27.5016	27.161
2060-12-04 12:00:00	25.8368	25.7205	25.8368
2061-01-04 12:00:00	24.2648	24.1346	24.2648
2061-02-03	23.3565	23.3077	23.3565
2061-03-04 12:00:00	24.4577	25.0114	24.4577
2061-04-04	27.2283	27.2536	27.2283
2061-05-04 12:00:00	29.2281	29.3603	29.2281
2061-06-04	31.0875	31.7487	31.0875
2061-07-04 12:00:00	31.4904	31.7971	31.4904
2061-08-04 12:00:00	31.7653	32.3047	31.7653
2061-09-04	30.6579	31.6146	30.6579
2061-10-04 12:00:00	28.1741	28.7245	28.1741
2061-11-04	26.7096	26.5643	26.7096
2061-12-04 12:00:00	25.0275	24.7847	25.0275
2062-01-04 12:00:00	23.183	23.0016	23.183
2062-02-03	23.7144	23.607	23.7144
2062-03-04 12:00:00	25.938	25.943	25.938
2062-04-04	28.2369	28.519	28.2369
2062-05-04 12:00:00	30.317	30.5032	30.317
2062-06-04	31.499	31.5998	31.499
2062-07-04 12:00:00	32.3993	32.5291	32.3993
2062-08-04 12:00:00	32.0283	32.3507	32.0283
2062-09-04	30.7988	31.0306	30.7988
2062-10-04 12:00:00	29.7453	29.7677	29.7453
2062-11-04	28.2399	28.081	28.2399
2062-12-04 12:00:00	25.8938	25.4678	25.8938
2063-01-04 12:00:00	24.6039	24.4324	24.6039
2063-02-03	24.0611	24.1975	24.0611
2063-03-04 12:00:00	25.0366	25.467	25.0366
2063-04-04	26.6107	27.0242	26.6107
2063-05-04 12:00:00	29.3978	30.2059	29.3978
2063-06-04	31.3118	31.6466	31.3118
2063-07-04 12:00:00	31.8877	32.151	31.8877
2063-08-04 12:00:00	31.189	31.3569	31.189
2063-09-04	30.7063	31.4208	30.7063
2063-10-04 12:00:00	28.5794	29.1816	28.5794
2063-11-04	27.2306	27.3379	27.2306
2063-12-04 12:00:00	25.8305	25.5851	25.8305
2064-01-04 12:00:00	24.0746	23.9052	24.0746
2064-02-03	24.113	24.2238	24.113
2064-03-03 12:00:00	26.1522	25.9346	26.1522
2064-04-03	28.5854	28.1374	28.5854
2064-05-03 12:00:00	29.5261	29.8416	29.5261
2064-06-03	31.132	31.5692	31.132
2064-07-03 12:00:00	30.897	31.3455	30.897
2064-08-03 12:00:00	31.0374	31.5525	31.0374
2064-09-03	30.7913	30.8927	30.7913
2064-10-03 12:00:00	28.9043	29.4069	28.9043
2064-11-03	26.8505	27.0224	26.8505
2064-12-03 12:00:00	25.4654	25.3841	25.4654
2065-01-03 12:00:00	24.1177	24.018	24.1177
2065-02-02	24.4888	24.6643	24.4888
2065-03-03 12:00:00	25.229	25.4994	25.229
2065-04-03	27.7762	27.6653	27.7762
2065-05-03 12:00:00	29.7165	29.6681	29.7165
2065-06-03	30.7139	31.1904	30.7139
2065-07-03 12:00:00	31.8098	32.4723	31.8098
2065-08-03 12:00:00	32.262	33.111	32.262
2065-09-03	31.6157	32.4884	31.6157
2065-10-03 12:00:00	29.1899	29.7747	29.1899
2065-11-03	28.1468	28.5654	28.1468
2065-12-03 12:00:00	26.41	26.4222	26.41
2066-01-03 12:00:00	24.3266	24.2014	24.3266
2066-02-02	24.8972	25.0527	24.8972
2066-03-03 12:00:00	26.8787	27.1578	26.8787
2066-04-03	27.6619	27.6345	27.6619
2066-05-03 12:00:00	29.7356	29.5526	29.7356
2066-06-03	30.8945	30.8397	30.8945
2066-07-03 12:00:00	31.9548	31.9272	31.9548
2066-08-03 12:00:00	31.3406	32.064	31.3406
2066-09-03	31.4427	31.9793	31.4427
2066-10-03 12:00:00	29.9845	29.7068	29.9845
2066-11-03	27.3874	26.7518	27.3874
2066-12-03 12:00:00	25.9824	25.579	25.9824
2067-01-03 12:00:00	24.5265	24.2809	24.5265
2067-02-02	24.5966	24.516	24.5966
2067-03-03 12:00:00	25.1995	25.3345	25.1995
2067-04-03	27.9972	27.8258	27.9972
2067-05-03 12:00:00	29.5052	29.9017	29.5052
2067-06-03	30.2945	31.3525	30.2945
2067-07-03 12:00:00	30.3539	31.4436	30.3539
2067-08-03 12:00:00	30.6638	31.4125	30.6638
2067-09-03	30.6782	31.8047	30.6782
2067-10-03 12:00:00	29.6127	30.2078	29.6127
2067-11-03	27.5928	27.5422	27.5928
2067-12-03 12:00:00	25.3902	25.209	25.3902
2068-01-03 12:00:00	24.9871	24.7737	24.9871
2068-02-02	24.7686	24.5008	24.7686
2068-03-02 12:00:00	25.5347	25.2214	25.5347
2068-04-02	27.7237	27.6952	27.7237
2068-05-02 12:00:00	29.0285	29.5666	29.0285
2068-06-02	31.363	31.5103	31.363
2068-07-02 12:00:00	31.8033	32.0011	31.8033
2068-08-02 12:00:00	31.6486	32.031	31.6486
2068-09-02	30.8692	31.4233	30.8692
2068-10-02 12:00:00	30.1173	30.1809	30.1173
2068-11-02	29.7212	30.1226	29.7212
2068-12-02 12:00:00	27.657	27.8198	27.657
2069-01-02 12:00:00	25.5449	25.3554	25.5449
2069-02-01	25.6006	25.2772	25.6006
2069-03-02 12:00:00	26.3941	26.2316	26.3941
2069-04-02	27.6483	27.6401	27.6483
2069-05-02 12:00:00	29.0669	29.3378	29.0669
2069-06-02	30.4242	31.9049	30.4242
2069-07-02 12:00:00	30.8123	31.8914	30.8123
2069-08-02 12:00:00	30.8027	31.9509	30.8027
2069-09-02	31.1172	32.0971	31.1172
2069-10-02 12:00:00	29.5528	29.8975	29.5528
2069-11-02	28.0417	27.9088	28.0417
2069-12-02 12:00:00	26.1912	25.712	26.1912
2070-01-02 12:00:00	24.2419	24.0722	24.2419
2070-02-01	23.7442	23.9401	23.7442
2070-03-02 12:00:00	24.7105	25.485	24.7105
2070-04-02	28.0637	28.8753	28.0637
2070-05-02 12:00:00	29.6779	30.3097	29.6779
2070-06-02	31.1203	31.6137	31.1203
2070-07-02 12:00:00	30.5629	30.6341	30.5629
2070-08-02 12:00:00	31.1094	31.5634	31.1094
2070-09-02	30.4055	31.3278	30.4055
2070-10-02 12:00:00	29.1849	29.7951	29.1849
2070-11-02	26.7604	26.8571	26.7604
2070-12-02 12:00:00	25.3449	25.2796	25.3449
2071-01-02 12:00:00	24.3402	24.344	24.3402
2071-02-01	24.0925	24.4407	24.0925
2071-03-02 12:00:00	25.6599	25.8662	25.6599
2071-04-02	27.9364	28.137	27.9364
2071-05-02 12:00:00	29.2498	30.2212	29.2498
2071-06-02	30.8632	31.4894	30.8632
2071-07-02 12:00:00	31.4577	32.2114	31.4577
2071-08-02 12:00:00	31.2396	32.0439	31.2396
2071-09-02	31.6041	31.9862	31.6041
2071-10-02 12:00:00	29.6982	29.9746	29.6982
2071-11-02	28.5465	28.6705	28.5465
2071-12-02 12:00:00	25.7584	25.5048	25.7584
2072-01-02 12:00:00	24.3943	24.2196	24.3943
2072-02-01	24.1639	24.4303	24.1639
2072-03-01 12:00:00	26.1121	26.2068	26.1121
2072-04-01	27.9463	28.0245	27.9463
2072-05-01 12:00:00	29.7035	30.0083	29.7035
2072-06-01	32.0778	31.8235	32.0778
2072-07-01 12:00:00	31.6474	32.434	31.6474
2072-08-01 12:00:00	31.8778	32.5959	31.8778
2072-09-01	31.3738	31.6238	31.3738
2072-10-01 12:00:00	29.5884	29.3285	29.5884
2072-11-01	27.7685	27.3617	27.7685
2072-12-01 12:00:00	26.339	26.0862	26.339
2073-01-01 12:00:00	24.2961	23.9739	24.2961
2073-01-31	23.9794	23.8262	23.9794
2073-03-01 12:00:00	25.3021	25.4764	25.3021
2073-04-01	27.638	27.743	27.638
2073-05-01 12:00:00	30.2128	30.2091	30.2128
2073-06-01	31.5551	32.26	31.5551
2073-07-01 12:00:00	32.0329	32.1632	32.0329
2073-08-01 12:00:00	31.3756	31.3328	31.3756
2073-09-01	30.4396	31.008	30.4396
2073-10-01 12:00:00	28.8458	29.1015	28.8458
2073-11-01	27.2961	26.9876	27.2961
2073-12-01 12:00:00	24.9758	24.2249	24.9758
2074-01-01 12:00:00	23.1564	22.6076	23.1564
2074-01-31	22.9485	22.7421	22.9485
2074-03-01 12:00:00	24.2153	24.4032	24.2153
2074-04-01	26.4784	26.526	26.4784
2074-05-01 12:00:00	29.3009	29.3267	29.3009
2074-06-01	29.3086	30.2176	29.3086
2074-07-01 12:00:00	31.0183	31.1099	31.0183
2074-08-01 12:00:00	30.497	30.8325	30.497
2074-09-01	30.3921	31.0387	30.3921
2074-10-01 12:00:00	28.5961	29.2776	28.5961
2074-11-01	27.183	27.8484	27.183
2074-12-01 12:00:00	24.4992	24.304	24.4992
2075-01-01 12:00:00	23.7767	23.3084	23.7767
2075-01-31	23.7778	23.5684	23.7778
2075-03-01 12:00:00	24.9579	25.3465	24.9579
2075-04-01	26.9843	27.409	26.9843
2075-05-01 12:00:00	28.9752	29.0535	28.9752
2075-06-01	31.0662	31.0782	31.0662
2075-07-01 12:00:00	31.2785	32.2667	31.2785
2075-08-01 12:00:00	32.2464	32.6276	32.2464
2075-09-01	31.4658	32.2913	31.4658
2075-10-01 12:00:00	29.729	30.5252	29.729
2075-11-01	28.0167	28.5401	28.0167
2075-12-01 12:00:00	25.8872	25.6345	25.8872
2076-01-01 12:00:00	24.8733	24.7937	24.8733
2076-01-31	24.7619	24.7896	24.7619
2076-02-29 12:00:00	27.1553	26.5796	27.1553
2076-03-31	28.709	28.5979	28.709
2076-04-30 12:00:00	30.1797	30.3547	30.1797
2076-05-31	32.0199	32.3768	32.0199
2076-06-30 12:00:00	32.3678	32.9976	32.3678
2076-07-31 12:00:00	32.5216	32.917	32.5216
2076-08-31	31.9017	32.5234	31.9017
2076-09-30 12:00:00	30.1761	30.3072	30.1761
2076-10-31	28.1429	28.1809	28.1429
2076-11-30 12:00:00	24.9304	24.7392	24.9304
2076-12-31 12:00:00	24.29	24.1117	24.29
2077-01-30	24.331	24.3447	24.331
2077-02-28 12:00:00	25.2975	25.9929	25.2975
2077-03-31	28.4648	28.6522	28.4648
2077-04-30 12:00:00	29.8125	30.2047	29.8125
2077-05-31	31.892	32.05	31.892
2077-06-30 12:00:00	32.3521	32.8608	32.3521
2077-07-31 12:00:00	31.6554	32.5763	31.6554
2077-08-31	30.9135	32.2681	30.9135
2077-09-30 12:00:00	29.7879	30.8621	29.7879
2077-10-31	28.8498	29.3181	28.8498
2077-11-30 12:00:00	26.4306	26.4747	26.4306
2077-12-31 12:00:00	25.4243	25.4864	25.4243
2078-01-30	24.8035	25.0679	24.8035
2078-02-28 12:00:00	25.6838	26.1114	25.6838
2078-03-31	27.0593	27.7821	27.0593
2078-04-30 12:00:00	29.9	29.9991	29.9
2078-05-31	30.4013	31.0563	30.4013
2078-06-30 12:00:00	31.7507	32.1866	31.7507
2078-07-31 12:00:00	31.984	32.2293	31.984
2078-08-31	30.6976	30.4542	30.6976
2078-09-30 12:00:00	28.9997	29.419	28.9997
2078-10-31	27.7379	27.8668	27.7379
2078-11-30 12:00:00	26.1184	26.1133	26.1184
2078-12-31 12:00:00	24.3252	24.0841	24.3252
2079-01-30	24.4333	24.3245	24.4333
2079-02-28 12:00:00	25.8165	26.1307	25.8165
2079-03-31	28.1435	28.2321	28.1435
2079-04-30 12:00:00	29.3047	29.9788	29.3047
2079-05-31	31.6931	31.7715	31.6931
2079-06-30 12:00:00	33.0257	33.1892	33.0257
2079-07-31 12:00:00	32.1506	32.9171	32.1506
2079-08-31	31.4758	32.6253	31.4758
2079-09-30 12:00:00	29.8558	30.9895	29.8558
2079-10-31	28.0861	28.4547	28.0861
2079-11-30 12:00:00	27.1576	27.058	27.1576
2079-12-31 12:00:00	25.7264	25.2927	25.7264
2080-01-30	24.5589	24.3639	24.5589
2080-02-28 12:00:00	25.8752	26.1098	25.8752
2080-03-30	28.2336	28.5444	28.2336
2080-04-29 12:00:00	29.7008	29.9687	29.7008
2080-05-30	31.7939	32.0521	31.7939
2080-06-29 12:00:00	32.2525	32.8248	32.2525
2080-07-30 12:00:00	31.3104	31.792	31.3104
2080-08-30	31.111	31.7021	31.111
2080-09-29 12:00:00	29.1346	29.6319	29.1346
2080-10-30	27.0898	27.1864	27.0898
2080-11-29 12:00:00	24.054	23.7418	24.054
2080-12-30 12:00:00	22.7472	22.4539	22.7472
2081-01-29	22.1198	22.3701	22.1198
2081-02-27 12:00:00	23.8915	24.5432	23.8915
2081-03-30	26.0909	27.0127	26.0909
2081-04-29 12:00:00	29.4487	29.6848	29.4487
2081-05-30	30.5736	31.1176	30.5736
2081-06-29 12:00:00	31.0885	31.61	31.0885
2081-07-30 12:00:00	31.2599	32.0106	31.2599
2081-08-30	30.7698	31.1877	30.7698
2081-09-29 12:00:00	29.0305	29.3232	29.0305
2081-10-30	27.7593	27.9718	27.7593
2081-11-29 12:00:00	26.065	25.7758	26.065
2081-12-30 12:00:00	25.1334	24.7873	25.1334
2082-01-29	25.4889	25.3391	25.4889
2082-02-27 12:00:00	27.1441	27.1127	27.1441
2082-03-30	28.3753	28.3256	28.3753
2082-04-29 12:00:00	30.7759	30.2258	30.7759
2082-05-30	31.0335	32.3081	31.0335
2082-06-29 12:00:00	31.6062	32.5355	31.6062
2082-07-30 12:00:00	31.9462	32.5432	31.9462
2082-08-30	31.0306	31.9921	31.0306
2082-09-29 12:00:00	29.7957	30.4436	29.7957
2082-10-30	28.4665	28.3685	28.4665
2082-11-29 12:00:00	26.0763	25.9414	26.0763
2082-12-30 12:00:00	25.2554	25.3241	25.2554
2083-01-29	25.6723	26.0671	25.6723
2083-02-27 12:00:00	25.7874	26.4589	25.7874
2083-03-30	27.8216	28.4714	27.8216
2083-04-29 12:00:00	29.9104	30.2832	29.9104
2083-05-30	31.5374	31.6735	31.5374
2083-06-29 12:00:00	31.1688	32.6875	31.1688
2083-07-30 12:00:00	31.9126	32.872	31.9126
2083-08-30	32.2286	32.8917	32.2286
2083-09-29 12:00:00	30.615	31.3294	30.615
2083-10-30	27.9618	28.4492	27.9618
2083-11-29 12:00:00	24.9595	24.6096	24.9595
2083-12-30 12:00:00	24.4049	24.1396	24.4049
2084-01-29	24.6289	25.0263	24.6289
2084-02-27 12:00:00	25.3874	25.9619	25.3874
2084-03-29	27.2937	27.5929	27.2937
2084-04-28 12:00:00	29.5351	30.1428	29.5351
2084-05-29	31.3725	31.7199	31.3725
2084-06-28 12:00:00	31.3392	31.3956	31.3392
2084-07-29 12:00:00	31.7974	32.0114	31.7974
2084-08-29	31.3649	32.2356	31.3649
2084-09-28 12:00:00	28.4821	29.0621	28.4821
2084-10-29	27.5343	27.4261	27.5343
2084-11-28 12:00:00	25.4513	25.1112	25.4513
2084-12-29 12:00:00	23.8784	23.7694	23.8784
2085-01-28	24.8261	24.6988	24.8261
2085-02-26 12:00:00	25.0189	24.9285	25.0189
2085-03-29	27.967	27.7757	27.967
2085-04-28 12:00:00	29.724	30.088	29.724
2085-05-29	31.0638	31.6782	31.0638
2085-06-28 12:00:00	31.1852	32.2461	31.1852
2085-07-29 12:00:00	32.0552	32.3787	32.0552
2085-08-29	30.9837	31.5656	30.9837
2085-09-28 12:00:00	29.9987	30.4956	29.9987
2085-10-29	28.4996	29.0215	28.4996
2085-11-28 12:00:00	26.1642	25.9701	26.1642
2085-12-29 12:00:00	25.2534	25.0668	25.2534
2086-01-28	25.2601	25.4632	25.2601
2086-02-26 12:00:00	27.4259	27.6388	27.4259
2086-03-29	28.7531	29.4163	28.7531
2086-04-28 12:00:00	29.8437	30.2583	29.8437
2086-05-29	31.4999	32.0997	31.4999
2086-06-28 12:00:00	31.6528	32.8157	31.6528
2086-07-29 12:00:00	32.3513	33.5331	32.3513
2086-08-29	31.6278	32.8784	31.6278
2086-09-28 12:00:00	30.134	31.0955	30.134
2086-10-29	28.0364	28.3133	28.0364
2086-11-28 12:00:00	26.3663	26.3538	26.3663
2086-12-29 12:00:00	25.6018	25.4867	25.6018
2087-01-28	25.6385	25.6951	25.6385
2087-02-26 12:00:00	26.5159	26.7041	26.5159
2087-03-29	27.9271	28.3065	27.9271
2087-04-28 12:00:00	29.1697	29.6728	29.1697
2087-05-29	31.874	31.7315	31.874
2087-06-28 12:00:00	32.7454	33.1499	32.7454
2087-07-29 12:00:00	31.4929	32.0223	31.4929
2087-08-29	31.3822	31.9741	31.3822
2087-09-28 12:00:00	30.0026	30.3257	30.0026
2087-10-29	28.1182	28.3486	28.1182
2087-11-28 12:00:00	25.6364	25.5288	25.6364
2087-12-29 12:00:00	24.6376	24.2264	24.6376
2088-01-28	25.1024	24.7712	25.1024
2088-02-26 12:00:00	26.4321	26.1348	26.4321
2088-03-28	27.9007	28.1045	27.9007
2088-04-27 12:00:00	30.2846	30.582	30.2846
2088-05-28	31.3271	31.7924	31.3271
2088-06-27 12:00:00	31.5473	33.2603	31.5473
2088-07-28 12:00:00	31.7229	32.9279	31.7229
2088-08-28	31.2957	32.5239	31.2957
2088-09-27 12:00:00	29.2094	29.6852	29.2094
2088-10-28	27.2188	27.4175	27.2188
2088-11-27 12:00:00	25.3054	25.2695	25.3054
2088-12-28 12:00:00	24.0658	24.0351	24.0658
2089-01-27	24.2058	24.432	24.2058
2089-02-25 12:00:00	24.7485	25.0386	24.7485
2089-03-28	27.0153	27.2063	27.0153
2089-04-27 12:00:00	30.2461	30.4216	30.2461
2089-05-28	31.7834	31.899	31.7834
2089-06-27 12:00:00	31.4116	31.9338	31.4116
2089-07-28 12:00:00	32.2109	32.7331	32.2109
2089-08-28	31.8377	32.3787	31.8377
2089-09-27 12:00:00	30.3618	30.9381	30.3618
2089-10-28	27.6898	28.0268	27.6898
2089-11-27 12:00:00	25.8976	25.5936	25.8976
2089-12-28 12:00:00	24.4797	24.1803	24.4797
2090-01-27	24.6534	24.5431	24.6534
2090-02-25 12:00:00	25.8714	25.7873	25.8714
2090-03-28	28.3155	27.6773	28.3155
2090-04-27 12:00:00	30.4912	30.7841	30.4912
2090-05-28	32.5529	32.7216	32.5529
2090-06-27 12:00:00	32.0192	32.6776	32.0192
2090-07-28 12:00:00	32.0916	32.3714	32.0916
2090-08-28	30.9371	31.8499	30.9371
2090-09-27 12:00:00	29.6486	29.704	29.6486
2090-10-28	28.2048	28.038	28.2048
2090-11-27 12:00:00	26.402	25.9878	26.402
2090-12-28 12:00:00	24.2751	23.6593	24.2751
2091-01-27	24.4562	24.3244	24.4562
2091-02-25 12:00:00	25.0029	25.2635	25.0029
2091-03-28	26.8638	27.3495	26.8638
2091-04-27 12:00:00	29.7009	30.2766	29.7009
2091-05-28	31.0111	31.8498	31.0111
2091-06-27 12:00:00	31.9451	32.8221	31.9451
2091-07-28 12:00:00	31.8476	32.4322	31.8476
2091-08-28	31.2992	32.1028	31.2992
2091-09-27 12:00:00	29.6374	29.8889	29.6374
2091-10-28	27.5429	27.6176	27.5429
2091-11-27 12:00:00	25.5633	25.3762	25.5633
2091-12-28 12:00:00	24.8589	24.8795	24.8589
2092-01-27	24.1195	24.578	24.1195
2092-02-25 12:00:00	25.1841	25.849	25.1841
2092-03-27	28.2332	28.512	28.2332
2092-04-26 12:00:00	29.72	29.9455	29.72
2092-05-27	31.6143	31.5715	31.6143
2092-06-26 12:00:00	32.4293	33.2613	32.4293
2092-07-27 12:00:00	32.3913	33.0262	32.3913
2092-08-27	30.2811	31.4729	30.2811
2092-09-26 12:00:00	29.1906	29.873	29.1906
2092-10-27	28.0026	28.0488	28.0026
2092-11-26 12:00:00	26.3298	25.9159	26.3298
2092-12-27 12:00:00	25.5878	25.4029	25.5878
2093-01-26	25.6394	25.5572	25.6394
2093-02-24 12:00:00	26.4397	26.3456	26.4397
2093-03-27	28.3672	28.2919	28.3672
2093-04-26 12:00:00	30.2768	30.2752	30.2768
2093-05-27	31.6032	31.6073	31.6032
2093-06-26 12:00:00	32.0962	32.4381	32.0962
2093-07-27 12:00:00	32.3982	32.8191	32.3982
2093-08-27	31.2914	31.8894	31.2914
2093-09-26 12:00:00	29.7176	29.8539	29.7176
2093-10-27	28.0703	28.4281	28.0703
2093-11-26 12:00:00	27.0645	26.7948	27.0645
2093-12-27 12:00:00	25.0532	24.4025	25.0532
2094-01-26	26.1539	25.9281	26.1539
2094-02-24 12:00:00	28.2526	27.8842	28.2526
2094-03-27	29.0147	28.8096	29.0147
2094-04-26 12:00:00	30.6094	30.8262	30.6094
2094-05-27	32.7757	32.7007	32.7757
2094-06-26 12:00:00	32.5324	32.6468	32.5324
2094-07-27 12:00:00	32.4214	32.8458	32.4214
2094-08-27	32.2242	32.7946	32.2242
2094-09-26 12:00:00	30.1593	30.0679	30.1593
2094-10-27	28.3681	28.283	28.3681
2094-11-26 12:00:00	27.1376	26.8266	27.1376
2094-12-27 12:00:00	25.3098	25.2153	25.3098
2095-01-26	24.9514	24.9454	24.9514
2095-02-24 12:00:00	25.3096	25.5703	25.3096
2095-03-27	27.489	27.657	27.489
2095-04-26 12:00:00	30.7907	30.2165	30.7907
2095-05-27	31.4658	32.1099	31.4658
2095-06-26 12:00:00	31.8223	32.5736	31.8223
2095-07-27 12:00:00	31.7823	32.8643	31.7823
2095-08-27	31.4667	32.3568	31.4667
2095-09-26 12:00:00	29.6633	29.6863	29.6633
2095-10-27	28.1263	28.0063	28.1263
2095-11-26 12:00:00	26.0704	26.0065	26.0704
2095-12-27 12:00:00	24.0425	23.6947	24.0425
2096-01-26	23.7683	23.543	23.7683
2096-02-24 12:00:00	24.8967	25.3634	24.8967
2096-03-26	26.9036	27.829	26.9036
2096-04-25 12:00:00	28.5498	29.6464	28.5498
2096-05-26	30.6379	31.2486	30.6379
2096-06-25 12:00:00	31.3894	31.9372	31.3894
2096-07-26 12:00:00	30.9784	31.9897	30.9784
2096-08-26	31.4165	31.8629	31.4165
2096-09-25 12:00:00	29.6635	29.8609	29.6635
2096-10-26	27.8223	28.1248	27.8223
2096-11-25 12:00:00	26.2825	26.4807	26.2825
2096-12-26 12:00:00	24.0604	23.962	24.0604
2097-01-25	24.1861	24.3934	24.1861
2097-02-23 12:00:00	25.7575	25.9952	25.7575
2097-03-26	28.3374	28.255	28.3374
2097-04-25 12:00:00	29.9196	30.2137	29.9196
2097-05-26	32.0073	32.0217	32.0073
2097-06-25 12:00:00	32.2001	33.0151	32.2001
2097-07-26 12:00:00	31.8932	32.6064	31.8932
2097-08-26	30.4187	31.6793	30.4187
2097-09-25 12:00:00	30.1483	30.831	30.1483
2097-10-26	28.5522	28.7714	28.5522
2097-11-25 12:00:00	26.4578	26.1537	26.4578
2097-12-26 12:00:00	24.8442	24.4547	24.8442
2098-01-25	24.9246	24.9764	24.9246
2098-02-23 12:00:00	26.7296	26.7243	26.7296
2098-03-26	28.1344	28.276	28.1344
2098-04-25 12:00:00	30.4517	30.3654	30.4517
2098-05-26	31.2172	31.6511	31.2172
2098-06-25 12:00:00	32.5996	33.2682	32.5996
2098-07-26 12:00:00	32.5455	33.1715	32.5455
2098-08-26	31.8154	32.2857	31.8154
2098-09-25 12:00:00	29.6732	29.9033	29.6732
2098-10-26	29.2942	29.6558	29.2942
2098-11-25 12:00:00	27.3023	27.4212	27.3023
2098-12-26 12:00:00	26.5219	26.648	26.5219
2099-01-25	26.5507	26.8486	26.5507
2099-02-23 12:00:00	28.1239	28.3849	28.1239
2099-03-26	29.0434	29.0344	29.0434
2099-04-25 12:00:00	30.6345	30.7054	30.6345
2099-05-26	31.8642	32.5293	31.8642
2099-06-25 12:00:00	32.2556	32.9032	32.2556
2099-07-26 12:00:00	31.9446	33.0826	31.9446
2099-08-26	31.6151	32.3808	31.6151
2099-09-25 12:00:00	30.2057	30.7088	30.2057
2099-10-26	28.8152	28.8152	28.8152
2099-11-25 12:00:00	27.1604	26.8271	27.1604

## Sheet: Table SF2
Time	East Coast	Pearl River Delta	West Coast
2015-01-16	0.121053	0.159904	0.17714
2015-02-15	0.123886	0.100403	0.101108
2015-03-16	0.130982	0.0636094	0.0911507
2015-04-16	0.0768565	0.0964445	0.137543
2015-05-16	0.122569	0.150239	0.222787
2015-06-16	0.18272	0.127708	0.109696
2015-07-16	0.572286	0.106086	0.152591
2015-08-16	0.449944	0.370668	0.414594
2015-09-16	0.395735	0.225246	0.289874
2015-10-16	0.126232	0.248341	0.277104
2015-11-16	0.304038	0.16892	0.202888
2015-12-16	0.235512	0.114752	0.135945
2016-01-16	0.185033	0.082678	0.063668
2016-02-15	0.0543526	0.0830574	0.0464956
2016-03-15	0.0539075	0.062827	0.0648168
2016-04-15	0.157029	0.166278	0.146273
2016-05-15	0.12146	0.114334	0.123832
2016-06-15	0.0767093	0.089198	0.0650836
2016-07-15	0.0858827	0.11754	0.17289
2016-08-15	0.487512	0.250688	0.263838
2016-09-15	0.101891	0.159003	0.188832
2016-10-15	0.289355	0.323767	0.178719
2016-11-15	0.263374	0.118268	0.161117
2016-12-15	0.0920559	0.046022	0.0594307
2017-01-15	0.204681	0.104535	0.0975087
2017-02-14	0.131717	0.0901998	0.125976
2017-03-15	0.15372	0.163234	0.136195
2017-04-15	0.115083	0.150906	0.17147
2017-05-15	0.259857	0.125781	0.162712
2017-06-15	0.240854	0.0918243	0.087775
2017-07-15	0.339935	0.352426	0.26219
2017-08-15	0.252728	0.142775	0.273059
2017-09-15	0.182288	0.19599	0.263948
2017-10-15	0.034356	0.0614345	0.0801172
2017-11-15	0.204756	0.238365	0.158575
2017-12-15	0.270959	0.119158	0.105057
2018-01-15	0.080822	0.0542838	0.0696362
2018-02-14	0.0755471	0.0878958	0.111595
2018-03-15	0.116651	0.0978815	0.126863
2018-04-15	0.0662645	0.0457738	0.0728736
2018-05-15	0.170353	0.133764	0.176005
2018-06-15	0.36294	0.269618	0.212002
2018-07-15	0.276324	0.239315	0.287677
2018-08-15	0.492873	0.301293	0.252021
2018-09-15	0.337	0.143417	0.191301
2018-10-15	0.0931681	0.126007	0.0860233
2018-11-15	0.201681	0.204997	0.169673
2018-12-15	0.37563	0.301103	0.245696
2019-01-15	0.245865	0.512733	0.280223
2019-02-14	0.162728	0.0776379	0.0746878
2019-03-15	0.0896735	0.0745657	0.0978587
2019-04-15	0.0800787	0.096561	0.237759
2019-05-15	0.147848	0.113461	0.159687
2019-06-15	0.264511	0.213528	0.41043
2019-07-15	0.244159	0.201966	0.305475
2019-08-15	0.424056	0.124177	0.282329
2019-09-15	0.226593	0.206387	0.332346
2019-10-15	0.144964	0.210443	0.230606
2019-11-15	0.328504	0.217041	0.213119
2019-12-15	0.272103	0.161199	0.166294
2020-01-15	0.067043	0.0597201	0.0359074
2020-02-14	0.106309	0.0893007	0.0762403
2020-03-14	0.10979	0.104463	0.11479
2020-04-14	0.190196	0.174799	0.196325
2020-05-14	0.233685	0.114028	0.215828
2020-06-14	0.107237	0.0805184	0.118155
2020-07-14	0.298359	0.215682	0.178066
2020-08-14	0.188308	0.208756	0.175342
2020-09-14	0.181876	0.187566	0.146171
2020-10-14	0.138	0.175826	0.161964
2020-11-14	0.193414	0.101105	0.0763203
2020-12-14	0.229556	0.0880069	0.0595217
2021-01-14	0.0695348	0.066666	0.0744023
2021-02-13	0.0275011	0.0196806	0.0366564
2021-03-14	0.043272	0.0564869	0.0714252
2021-04-14	0.106772	0.122533	0.145223
2021-05-14	0.0736139	0.0800646	0.105303
2021-06-14	0.0695854	0.080248	0.113378
2021-07-14	0.336055	0.207448	0.259157
2021-08-14	0.318658	0.127196	0.142874
2021-09-14	0.124555	0.224635	0.12115
2021-10-14	0.183125	0.102387	0.162993
2021-11-14	0.551428	0.46056	0.17893
2021-12-14	0.369689	0.106403	0.0818867
2022-01-14	0.22599	0.304213	0.171813
2022-02-13	0.0570051	0.0604528	0.0638794
2022-03-14	0.168662	0.107668	0.0945462
2022-04-14	0.142259	0.0961512	0.0774852
2022-05-14	0.0953165	0.0858246	0.0997579
2022-06-14	0.144988	0.0630577	0.0884642
2022-07-14	0.301899	0.310556	0.28154
2022-08-14	0.230021	0.191383	0.244299
2022-09-14	0.180771	0.330322	0.231566
2022-10-14	0.177284	0.420977	0.514762
2022-11-14	0.167504	0.152062	0.156755
2022-12-14	0.199216	0.124167	0.130995
2023-01-14	0.0799793	0.0277769	0.018548
2023-02-13	0.16607	0.0885905	0.10477
2023-03-14	0.135493	0.117002	0.137998
2023-04-14	0.0994508	0.0782774	0.134952
2023-05-14	0.206458	0.151307	0.188401
2023-06-14	0.256052	0.114641	0.106983
2023-07-14	0.337266	0.248697	0.230097
2023-08-14	0.254519	0.262723	0.297078
2023-09-14	0.288004	0.331086	0.234013
2023-10-14	0.286474	0.194368	0.158795
2023-11-14	0.554419	0.42143	0.218961
2023-12-14	0.0780682	0.0973948	0.138513
2024-01-14	0.117871	0.0726715	0.113353
2024-02-13	0.0662989	0.0553196	0.0539672
2024-03-13	0.0934076	0.043018	0.0458774
2024-04-13	0.246712	0.161233	0.161083
2024-05-13	0.160797	0.0934716	0.104132
2024-06-13	0.198327	0.253407	0.294097
2024-07-13	0.169771	0.119187	0.292729
2024-08-13	0.382637	0.238769	0.288046
2024-09-13	0.22351	0.170487	0.135656
2024-10-13	0.442213	0.167113	0.174225
2024-11-13	0.178671	0.142583	0.143446
2024-12-13	0.155729	0.0868274	0.0864893
2025-01-13	0.0730093	0.0783714	0.0930943
2025-02-12	0.0699355	0.0582974	0.0401659
2025-03-13	0.118837	0.103022	0.112407
2025-04-13	0.180322	0.148118	0.159261
2025-05-13	0.103757	0.095117	0.0903388
2025-06-13	0.226563	0.17922	0.394471
2025-07-13	0.226196	0.337361	0.328406
2025-08-13	0.191779	0.164808	0.241589
2025-09-13	0.20349	0.222973	0.179579
2025-10-13	0.183759	0.155005	0.092519
2025-11-13	0.27235	0.22834	0.144074
2025-12-13	0.176721	0.186487	0.173913
2026-01-13	0.232298	0.148572	0.145954
2026-02-12	0.156496	0.0914318	0.0895453
2026-03-13	0.213872	0.187612	0.255966
2026-04-13	0.204633	0.148708	0.16674
2026-05-13	0.510811	0.134822	0.150283
2026-06-13	0.209926	0.261855	0.249701
2026-07-13	0.143111	0.124497	0.139041
2026-08-13	0.725684	0.302422	0.205721
2026-09-13	0.448551	0.256629	0.375194
2026-10-13	0.166468	0.104279	0.129999
2026-11-13	0.156888	0.0640651	0.100936
2026-12-13	0.346203	0.279243	0.162562
2027-01-13	0.172898	0.133437	0.0631627
2027-02-12	0.118759	0.0586731	0.0618367
2027-03-13	0.0571664	0.058719	0.0990518
2027-04-13	0.133203	0.0964045	0.163377
2027-05-13	0.098265	0.0755049	0.115331
2027-06-13	0.213408	0.114596	0.0784698
2027-07-13	0.401306	0.287855	0.240723
2027-08-13	0.210424	0.351817	0.487795
2027-09-13	0.175766	0.337575	0.398504
2027-10-13	0.0984167	0.053063	0.0354394
2027-11-13	0.198179	0.119813	0.168343
2027-12-13	0.242063	0.312961	0.154133
2028-01-13	0.111097	0.0620808	0.0686445
2028-02-12	0.281871	0.20677	0.218163
2028-03-12	0.101082	0.127907	0.121622
2028-04-12	0.184075	0.155819	0.139875
2028-05-12	0.146653	0.0972847	0.102936
2028-06-12	0.115924	0.14752	0.135549
2028-07-12	0.139594	0.145605	0.158833
2028-08-12	0.172398	0.159008	0.188326
2028-09-12	0.126376	0.19382	0.191074
2028-10-12	0.0980234	0.109005	0.205704
2028-11-12	0.342213	0.173639	0.185463
2028-12-12	0.131988	0.0663221	0.0902987
2029-01-12	0.130529	0.108843	0.133783
2029-02-11	0.119868	0.0734956	0.0816692
2029-03-12	0.186737	0.162346	0.173277
2029-04-12	0.153265	0.0875115	0.127358
2029-05-12	0.0931278	0.1217	0.157003
2029-06-12	0.115221	0.0730487	0.110124
2029-07-12	0.100972	0.152379	0.161989
2029-08-12	0.179053	0.378325	0.389431
2029-09-12	0.257937	0.397471	0.496382
2029-10-12	0.330095	0.302335	0.343605
2029-11-12	0.233083	0.564559	0.428415
2029-12-12	0.260475	0.185953	0.119583
2030-01-12	0.236675	0.115119	0.155043
2030-02-11	0.0795764	0.100592	0.0735624
2030-03-12	0.106071	0.0850499	0.0816053
2030-04-12	0.105503	0.126451	0.125371
2030-05-12	0.246166	0.295827	0.327941
2030-06-12	0.275712	0.147284	0.127769
2030-07-12	0.301342	0.270736	0.419664
2030-08-12	0.326052	0.208372	0.19349
2030-09-12	0.150825	0.0374465	0.179888
2030-10-12	0.600613	0.48979	0.182467
2030-11-12	0.401267	0.220826	0.208122
2030-12-12	0.284896	0.147773	0.182364
2031-01-12	0.32202	0.375967	0.243777
2031-02-11	0.0601291	0.045638	0.0497266
2031-03-12	0.0725619	0.0597735	0.0659559
2031-04-12	0.170956	0.12523	0.159827
2031-05-12	0.0837405	0.160708	0.128026
2031-06-12	0.204966	0.206453	0.27444
2031-07-12	0.307625	0.206514	0.165902
2031-08-12	0.251994	0.187567	0.335726
2031-09-12	0.276152	0.264069	0.383528
2031-10-12	0.1576	0.108416	0.10277
2031-11-12	0.0886218	0.109281	0.126229
2031-12-12	0.266294	0.22355	0.199997
2032-01-12	0.0663362	0.129412	0.13689
2032-02-11	0.108633	0.126564	0.121656
2032-03-11	0.0787965	0.0643207	0.0853554
2032-04-11	0.0983267	0.0948809	0.149988
2032-05-11	0.295801	0.142347	0.175155
2032-06-11	0.160719	0.134903	0.246877
2032-07-11	0.25734	0.315264	0.256509
2032-08-11	0.209962	0.219371	0.232847
2032-09-11	0.237423	0.305371	0.240662
2032-10-11	0.321599	0.208651	0.225381
2032-11-11	0.184214	0.166774	0.163512
2032-12-11	0.220054	0.128255	0.057781
2033-01-11	0.0676357	0.0658461	0.0581371
2033-02-10	0.518462	0.085513	0.0804853
2033-03-11	0.100895	0.102454	0.0759246
2033-04-11	0.21057	0.126671	0.138281
2033-05-11	0.121216	0.0821969	0.108171
2033-06-11	0.153433	0.152999	0.137179
2033-07-11	0.280432	0.0893412	0.0995771
2033-08-11	0.183073	0.144607	0.251351
2033-09-11	0.219849	0.173824	0.151171
2033-10-11	0.125408	0.111671	0.186374
2033-11-11	0.278428	0.161804	0.208818
2033-12-11	0.215544	0.0785666	0.0887467
2034-01-11	0.192121	0.0800634	0.0964061
2034-02-10	0.186337	0.146568	0.367031
2034-03-11	0.14775	0.120887	0.121813
2034-04-11	0.108497	0.0996764	0.135842
2034-05-11	0.124343	0.160531	0.169009
2034-06-11	0.442694	0.266599	0.19655
2034-07-11	0.638307	0.246092	0.169112
2034-08-11	0.477791	0.245757	0.214623
2034-09-11	0.193627	0.269682	0.251366
2034-10-11	0.0705011	0.0733541	0.103684
2034-11-11	0.133182	0.145167	0.223855
2034-12-11	0.160005	0.104647	0.161023
2035-01-11	0.0536848	0.0347024	0.0438811
2035-02-10	0.0421128	0.0722938	0.0484653
2035-03-11	0.101493	0.0554239	0.0719073
2035-04-11	0.147143	0.102386	0.133232
2035-05-11	0.546047	0.09153	0.138873
2035-06-11	0.207072	0.156213	0.322424
2035-07-11	0.224268	0.294619	0.258114
2035-08-11	0.311372	0.197307	0.22298
2035-09-11	0.107077	0.375056	0.4109
2035-10-11	0.21325	0.165651	0.106585
2035-11-11	0.300866	0.136041	0.100198
2035-12-11	0.230071	0.16201	0.168954
2036-01-11	0.104455	0.169849	0.231244
2036-02-10	0.0851662	0.0510438	0.066105
2036-03-10	0.0970679	0.0767666	0.0762206
2036-04-10	0.186334	0.109348	0.0898478
2036-05-10	0.334491	0.140217	0.204166
2036-06-10	0.377799	0.277314	0.273788
2036-07-10	0.123899	0.140904	0.228103
2036-08-10	0.100022	0.198969	0.240296
2036-09-10	0.447435	0.219409	0.178298
2036-10-10	0.108473	0.336299	0.383
2036-11-10	0.326575	0.201016	0.138485
2036-12-10	0.243993	0.25665	0.210288
2037-01-10	0.0540366	0.0340074	0.0214887
2037-02-09	0.0605827	0.0543225	0.0690445
2037-03-10	0.207292	0.0882393	0.0921309
2037-04-10	0.133876	0.144152	0.157054
2037-05-10	0.142098	0.162781	0.176684
2037-06-10	0.0984501	0.0954287	0.180707
2037-07-10	0.187334	0.348163	0.450224
2037-08-10	0.222692	0.227648	0.310034
2037-09-10	0.408882	0.284956	0.263551
2037-10-10	0.106375	0.109836	0.105215
2037-11-10	0.134351	0.16482	0.129342
2037-12-10	0.133345	0.118445	0.0867068
2038-01-10	0.106338	0.0748641	0.0666448
2038-02-09	0.102306	0.0726642	0.122091
2038-03-10	0.147276	0.120092	0.108455
2038-04-10	0.124857	0.252065	0.154985
2038-05-10	0.12873	0.14426	0.131775
2038-06-10	0.358156	0.124471	0.123917
2038-07-10	0.496252	0.190443	0.209131
2038-08-10	0.372333	0.574802	0.470832
2038-09-10	0.247494	0.219208	0.115589
2038-10-10	0.391826	0.263347	0.222828
2038-11-10	0.26803	0.144961	0.117421
2038-12-10	0.207372	0.096676	0.0490518
2039-01-10	0.0903655	0.0580273	0.0738798
2039-02-09	0.0984369	0.069997	0.0861177
2039-03-10	0.0886286	0.0829859	0.115002
2039-04-10	0.119007	0.0643675	0.135934
2039-05-10	0.219545	0.127156	0.168342
2039-06-10	0.199518	0.127017	0.140793
2039-07-10	0.487236	0.364821	0.325708
2039-08-10	0.283472	0.24028	0.170868
2039-09-10	0.586615	0.382427	0.220327
2039-10-10	0.486649	0.348456	0.234141
2039-11-10	0.23638	0.24289	0.189763
2039-12-10	0.279048	0.103314	0.131235
2040-01-10	0.0432908	0.0386167	0.0429794
2040-02-09	0.117487	0.0983461	0.09977
2040-03-09	0.11182	0.105312	0.17692
2040-04-09	0.203692	0.186419	0.18828
2040-05-09	0.0878488	0.0762073	0.158642
2040-06-09	0.457305	0.20979	0.258915
2040-07-09	0.630596	0.390694	0.228841
2040-08-09	0.295902	0.147001	0.121158
2040-09-09	0.067453	0.20569	0.135396
2040-10-09	0.199384	0.208766	0.14012
2040-11-09	0.164633	0.258049	0.239829
2040-12-09	0.240844	0.186875	0.163373
2041-01-09	0.227181	0.279632	0.194503
2041-02-08	0.0742929	0.0610902	0.0905249
2041-03-09	0.217563	0.135782	0.131002
2041-04-09	0.137709	0.0902343	0.103124
2041-05-09	0.292895	0.134635	0.178395
2041-06-09	0.116925	0.219474	0.20821
2041-07-09	0.247098	0.241855	0.187538
2041-08-09	0.237948	0.191856	0.179528
2041-09-09	0.155813	0.161009	0.160669
2041-10-09	0.621393	0.356848	0.345047
2041-11-09	0.192996	0.226006	0.157928
2041-12-09	0.149188	0.138538	0.0750311
2042-01-09	0.105042	0.0672331	0.110908
2042-02-08	0.127148	0.201316	0.167454
2042-03-09	0.0967139	0.123259	0.200104
2042-04-09	0.132512	0.113759	0.111198
2042-05-09	0.294704	0.163513	0.154892
2042-06-09	0.0900292	0.104977	0.181772
2042-07-09	0.0824175	0.238156	0.29718
2042-08-09	0.223111	0.181246	0.202286
2042-09-09	0.304522	0.527205	0.642152
2042-10-09	0.221851	0.0884137	0.118453
2042-11-09	0.311514	0.0971069	0.0790436
2042-12-09	0.287746	0.298827	0.282179
2043-01-09	0.252177	0.0933837	0.109348
2043-02-08	0.0512151	0.0413468	0.0579258
2043-03-09	0.142333	0.095334	0.0897714
2043-04-09	0.222669	0.0963454	0.186119
2043-05-09	0.102102	0.133027	0.109209
2043-06-09	0.252527	0.214588	0.165221
2043-07-09	0.234146	0.541892	0.35033
2043-08-09	0.147963	0.171773	0.25338
2043-09-09	0.40789	0.16921	0.267035
2043-10-09	0.404846	0.295295	0.134138
2043-11-09	0.314673	0.210341	0.201646
2043-12-09	0.221714	0.123199	0.177852
2044-01-09	0.134643	0.0448836	0.0949147
2044-02-08	0.151933	0.0861444	0.106919
2044-03-08	0.242526	0.146164	0.211622
2044-04-08	0.131679	0.146926	0.198783
2044-05-08	0.0938646	0.119483	0.140595
2044-06-08	0.213533	0.148779	0.153358
2044-07-08	0.36796	0.216114	0.340028
2044-08-08	0.255615	0.3632	0.427883
2044-09-08	0.347391	0.306038	0.195384
2044-10-08	0.0689285	0.0951809	0.130309
2044-11-08	0.153886	0.111311	0.121161
2044-12-08	0.217475	0.210744	0.2092
2045-01-08	0.25889	0.227346	0.214738
2045-02-07	0.197265	0.147354	0.118197
2045-03-08	0.0771263	0.0604157	0.0649623
2045-04-08	0.0783612	0.0538979	0.0973062
2045-05-08	0.245346	0.230074	0.180395
2045-06-08	0.28489	0.249346	0.248226
2045-07-08	0.712641	0.279729	0.322991
2045-08-08	0.314145	0.206052	0.187682
2045-09-08	0.215962	0.476345	0.265772
2045-10-08	0.107385	0.0780601	0.0840908
2045-11-08	0.260736	0.0898235	0.0689698
2045-12-08	0.0384299	0.0109488	0.0120773
2046-01-08	0.10624	0.0736328	0.0874269
2046-02-07	0.133645	0.117357	0.110544
2046-03-08	0.195365	0.103909	0.0859626
2046-04-08	0.138897	0.141292	0.139839
2046-05-08	0.153913	0.181984	0.21253
2046-06-08	0.1179	0.0955954	0.110192
2046-07-08	0.23311	0.222267	0.16793
2046-08-08	0.218828	0.173762	0.227442
2046-09-08	0.138392	0.206178	0.187675
2046-10-08	0.273234	0.207413	0.103623
2046-11-08	0.370767	0.14197	0.129479
2046-12-08	0.395437	0.212625	0.224269
2047-01-08	0.102205	0.0695679	0.0772546
2047-02-07	0.101662	0.10634	0.0588861
2047-03-08	0.118736	0.1179	0.0964873
2047-04-08	0.138937	0.123004	0.119374
2047-05-08	0.26265	0.136693	0.176291
2047-06-08	0.148418	0.158381	0.123887
2047-07-08	0.335955	0.194442	0.321217
2047-08-08	0.282637	0.297335	0.409876
2047-09-08	0.137179	0.216727	0.40404
2047-10-08	0.305493	0.306737	0.316256
2047-11-08	0.369249	0.237666	0.202108
2047-12-08	0.185882	0.261714	0.0711377
2048-01-08	0.0540138	0.0254627	0.0374025
2048-02-07	0.0796747	0.0502276	0.0478606
2048-03-07	0.180046	0.125366	0.146185
2048-04-07	0.0691392	0.0614645	0.122437
2048-05-07	0.0998821	0.0671065	0.133464
2048-06-07	0.162213	0.0893495	0.125881
2048-07-07	0.282598	0.223647	0.259006
2048-08-07	0.493319	0.300799	0.206801
2048-09-07	0.121471	0.203879	0.129786
2048-10-07	0.0509358	0.0785686	0.167434
2048-11-07	0.201212	0.233391	0.160358
2048-12-07	0.164358	0.121181	0.11804
2049-01-07	0.0893492	0.0814087	0.0811144
2049-02-06	0.102783	0.043059	0.0595999
2049-03-07	0.110537	0.0857408	0.124039
2049-04-07	0.199876	0.166975	0.13889
2049-05-07	0.059947	0.0865835	0.19809
2049-06-07	0.288813	0.244392	0.171571
2049-07-07	0.467585	0.306204	0.252699
2049-08-07	0.273284	0.240461	0.327904
2049-09-07	0.293192	0.159687	0.13601
2049-10-07	0.304864	0.128486	0.10518
2049-11-07	0.185225	0.126508	0.136487
2049-12-07	0.161806	0.0891839	0.0824921
2050-01-07	0.104889	0.070523	0.0854851
2050-02-06	0.0426092	0.0331392	0.0559506
2050-03-07	0.120013	0.0868398	0.11874
2050-04-07	0.119822	0.172427	0.145615
2050-05-07	0.0975379	0.094855	0.0792759
2050-06-07	0.256077	0.0836792	0.122936
2050-07-07	0.18792	0.285751	0.195174
2050-08-07	0.322418	0.286952	0.231479
2050-09-07	0.289412	0.160726	0.140203
2050-10-07	0.213514	0.0792841	0.115469
2050-11-07	0.305002	0.210448	0.140679
2050-12-07	0.241574	0.0881095	0.087272
2051-01-07 12:00:00	0.0562464	0.0318834	0.0373777
2051-02-06	0.0809272	0.0705414	0.0714867
2051-03-07 12:00:00	0.140301	0.175075	0.110581
2051-04-07	0.136409	0.093824	0.124906
2051-05-07 12:00:00	0.0734384	0.110943	0.195759
2051-06-07	0.27643	0.195178	0.319816
2051-07-07 12:00:00	0.294301	0.165956	0.208888
2051-08-07 12:00:00	0.535406	0.481886	0.49072
2051-09-07	0.266283	0.165547	0.210245
2051-10-07 12:00:00	0.0298083	0.140249	0.0974562
2051-11-07	0.233893	0.215835	0.26892
2051-12-07 12:00:00	0.105221	0.0480684	0.0236528
2052-01-07 12:00:00	0.175221	0.0761487	0.0629892
2052-02-06	0.0730856	0.0695265	0.078755
2052-03-06 12:00:00	0.0545299	0.0459512	0.0672891
2052-04-06	0.103528	0.0586171	0.117222
2052-05-06 12:00:00	0.258295	0.136733	0.1026
2052-06-06	0.268289	0.0660259	0.118952
2052-07-06 12:00:00	0.184113	0.0920769	0.148249
2052-08-06 12:00:00	0.199529	0.316855	0.329936
2052-09-06	0.213735	0.202829	0.221307
2052-10-06 12:00:00	0.0515821	0.0650127	0.0923661
2052-11-06	0.251103	0.189801	0.166177
2052-12-06 12:00:00	0.118898	0.10853	0.0988656
2053-01-06 12:00:00	0.133514	0.0671489	0.0916296
2053-02-05	0.172175	0.116121	0.12923
2053-03-06 12:00:00	0.156549	0.0771943	0.0886516
2053-04-06	0.220095	0.117345	0.121203
2053-05-06 12:00:00	0.197719	0.14973	0.116804
2053-06-06	0.373961	0.191355	0.17182
2053-07-06 12:00:00	0.173768	0.205097	0.0625605
2053-08-06 12:00:00	0.257602	0.254788	0.264254
2053-09-06	0.131891	0.202861	0.122784
2053-10-06 12:00:00	0.183705	0.210003	0.358802
2053-11-06	0.414827	0.179348	0.123324
2053-12-06 12:00:00	0.342613	0.110766	0.114906
2054-01-06 12:00:00	0.108447	0.0700538	0.0927404
2054-02-05	0.0749757	0.0886905	0.0734017
2054-03-06 12:00:00	0.225549	0.103526	0.12068
2054-04-06	0.116974	0.136921	0.18259
2054-05-06 12:00:00	0.284414	0.144752	0.22605
2054-06-06	0.223336	0.401928	0.286236
2054-07-06 12:00:00	0.43176	0.183757	0.179812
2054-08-06 12:00:00	0.487264	0.246549	0.24919
2054-09-06	0.155692	0.180674	0.188214
2054-10-06 12:00:00	0.283023	0.335006	0.310649
2054-11-06	0.13889	0.188553	0.240355
2054-12-06 12:00:00	0.282462	0.163804	0.138156
2055-01-06 12:00:00	0.202182	0.141513	0.120718
2055-02-05	0.22428	0.119083	0.0669011
2055-03-06 12:00:00	0.0560717	0.0754129	0.0807279
2055-04-06	0.190525	0.160894	0.189058
2055-05-06 12:00:00	0.189817	0.0840401	0.151947
2055-06-06	0.227681	0.170436	0.218548
2055-07-06 12:00:00	0.316476	0.247908	0.286
2055-08-06 12:00:00	0.254666	0.317251	0.365569
2055-09-06	0.338827	0.393122	0.348187
2055-10-06 12:00:00	0.0435343	0.0794812	0.120881
2055-11-06	0.361058	0.417924	0.245936
2055-12-06 12:00:00	0.166073	0.0893202	0.0906127
2056-01-06 12:00:00	0.0985292	0.0638291	0.076741
2056-02-05	0.108195	0.0696838	0.110102
2056-03-05 12:00:00	0.175961	0.0627178	0.0920359
2056-04-05	0.0851977	0.076803	0.108195
2056-05-05 12:00:00	0.0994158	0.115479	0.138274
2056-06-05	0.234871	0.141254	0.0938748
2056-07-05 12:00:00	0.109948	0.172872	0.353681
2056-08-05 12:00:00	0.169873	0.22342	0.24882
2056-09-05	0.0479767	0.0849961	0.0653731
2056-10-05 12:00:00	0.120951	0.0928109	0.139788
2056-11-05	0.255504	0.118368	0.16628
2056-12-05 12:00:00	0.189744	0.117128	0.107714
2057-01-05 12:00:00	0.0561962	0.0327205	0.0129055
2057-02-04	0.105467	0.0871793	0.0503405
2057-03-05 12:00:00	0.129884	0.101946	0.168339
2057-04-05	0.457863	0.151158	0.137832
2057-05-05 12:00:00	0.48973	0.151948	0.246766
2057-06-05	0.107827	0.146491	0.110927
2057-07-05 12:00:00	0.32066	0.135945	0.162672
2057-08-05 12:00:00	0.300232	0.263921	0.330843
2057-09-05	0.290661	0.264984	0.247785
2057-10-05 12:00:00	0.111794	0.0920589	0.108779
2057-11-05	0.144072	0.21329	0.211403
2057-12-05 12:00:00	0.158084	0.142643	0.0803532
2058-01-05 12:00:00	0.119225	0.0425179	0.0645712
2058-02-04	0.119328	0.101387	0.104103
2058-03-05 12:00:00	0.191989	0.130081	0.162193
2058-04-05	0.255877	0.11392	0.137691
2058-05-05 12:00:00	0.285614	0.220942	0.226414
2058-06-05	0.280204	0.113544	0.295743
2058-07-05 12:00:00	0.521593	0.250925	0.361655
2058-08-05 12:00:00	0.0786553	0.0824465	0.263006
2058-09-05	0.213871	0.151815	0.149533
2058-10-05 12:00:00	0.202225	0.336036	0.20899
2058-11-05	0.196642	0.145863	0.132366
2058-12-05 12:00:00	0.0638595	0.0596876	0.0430614
2059-01-05 12:00:00	0.214575	0.204311	0.160068
2059-02-04	0.111365	0.08929	0.131189
2059-03-05 12:00:00	0.0661211	0.0684595	0.0896899
2059-04-05	0.0942622	0.10603	0.100322
2059-05-05 12:00:00	0.103221	0.135084	0.129511
2059-06-05	0.305343	0.165085	0.245885
2059-07-05 12:00:00	0.357658	0.210532	0.22429
2059-08-05 12:00:00	0.418239	0.246063	0.221857
2059-09-05	0.285036	0.122651	0.10828
2059-10-05 12:00:00	0.141756	0.0856512	0.14979
2059-11-05	0.193336	0.158229	0.132249
2059-12-05 12:00:00	0.106743	0.0931117	0.105323
2060-01-05 12:00:00	0.172058	0.105593	0.086842
2060-02-04	0.078061	0.0804061	0.105456
2060-03-04 12:00:00	0.147088	0.0911094	0.120167
2060-04-04	0.146983	0.148704	0.165448
2060-05-04 12:00:00	0.0742127	0.0796531	0.151256
2060-06-04	0.191219	0.154416	0.162963
2060-07-04 12:00:00	0.127639	0.122217	0.14447
2060-08-04 12:00:00	0.184062	0.298309	0.346423
2060-09-04	0.093382	0.082462	0.108808
2060-10-04 12:00:00	0.18783	0.172187	0.172033
2060-11-04	0.428084	0.181258	0.155439
2060-12-04 12:00:00	0.272798	0.115649	0.0957207
2061-01-04 12:00:00	0.111518	0.18558	0.0822321
2061-02-03	0.0903148	0.0905354	0.09914
2061-03-04 12:00:00	0.167988	0.109171	0.129833
2061-04-04	0.186631	0.156457	0.212064
2061-05-04 12:00:00	0.186668	0.198166	0.122293
2061-06-04	0.204345	0.162771	0.190809
2061-07-04 12:00:00	0.422219	0.433879	0.347471
2061-08-04 12:00:00	0.396087	0.234809	0.202397
2061-09-04	0.180367	0.150761	0.174687
2061-10-04 12:00:00	0.48966	0.16573	0.154868
2061-11-04	0.259098	0.18152	0.144708
2061-12-04 12:00:00	0.124461	0.122343	0.143641
2062-01-04 12:00:00	0.0532577	0.0329803	0.0507063
2062-02-03	0.146695	0.0824733	0.106753
2062-03-04 12:00:00	0.144549	0.0717901	0.113522
2062-04-04	0.183088	0.103196	0.146238
2062-05-04 12:00:00	0.209754	0.116132	0.161132
2062-06-04	0.133289	0.109809	0.174735
2062-07-04 12:00:00	0.0791469	0.0847905	0.113013
2062-08-04 12:00:00	0.386466	0.368301	0.3885
2062-09-04	0.302496	0.217346	0.288719
2062-10-04 12:00:00	0.217898	0.42917	0.280172
2062-11-04	0.171176	0.138822	0.226359
2062-12-04 12:00:00	0.161885	0.137919	0.115462
2063-01-04 12:00:00	0.128768	0.196084	0.0952684
2063-02-03	0.0417901	0.0299519	0.0481411
2063-03-04 12:00:00	0.0822829	0.0777725	0.072532
2063-04-04	0.147199	0.176859	0.143539
2063-05-04 12:00:00	0.165369	0.105187	0.178885
2063-06-04	0.133956	0.326916	0.236033
2063-07-04 12:00:00	0.282393	0.233865	0.461942
2063-08-04 12:00:00	0.2187	0.26461	0.517854
2063-09-04	0.236408	0.202505	0.244372
2063-10-04 12:00:00	0.102956	0.300601	0.252047
2063-11-04	0.343417	0.298749	0.379157
2063-12-04 12:00:00	0.177719	0.125436	0.146787
2064-01-04 12:00:00	0.160537	0.122412	0.0746421
2064-02-03	0.101151	0.0504116	0.067053
2064-03-03 12:00:00	0.1334	0.10204	0.118334
2064-04-03	0.211848	0.206936	0.218607
2064-05-03 12:00:00	0.220461	0.113411	0.153439
2064-06-03	0.23004	0.16488	0.170816
2064-07-03 12:00:00	0.236514	0.275846	0.236614
2064-08-03 12:00:00	0.311761	0.638753	0.487327
2064-09-03	0.152292	0.137333	0.182216
2064-10-03 12:00:00	0.208232	0.0963232	0.0974056
2064-11-03	0.315638	0.213493	0.234148
2064-12-03 12:00:00	0.0642818	0.0665366	0.0727259
2065-01-03 12:00:00	0.118881	0.0567422	0.113375
2065-02-02	0.0595006	0.048622	0.0676181
2065-03-03 12:00:00	0.141041	0.121892	0.122365
2065-04-03	0.0925022	0.0853263	0.109535
2065-05-03 12:00:00	0.140322	0.091571	0.0760096
2065-06-03	0.132538	0.0821826	0.104633
2065-07-03 12:00:00	0.122109	0.178885	0.189347
2065-08-03 12:00:00	0.102855	0.109848	0.19501
2065-09-03	0.208608	0.359791	0.327769
2065-10-03 12:00:00	0.338148	0.19274	0.139939
2065-11-03	0.206812	0.0969056	0.126393
2065-12-03 12:00:00	0.201722	0.210415	0.111737
2066-01-03 12:00:00	0.100298	0.124789	0.117795
2066-02-02	0.0800594	0.0566343	0.124833
2066-03-03 12:00:00	0.152285	0.0903277	0.0986907
2066-04-03	0.155618	0.124655	0.1678
2066-05-03 12:00:00	0.271157	0.183167	0.153563
2066-06-03	0.269082	0.158944	0.160971
2066-07-03 12:00:00	0.222167	0.280007	0.158188
2066-08-03 12:00:00	0.399831	0.419979	0.211245
2066-09-03	0.182723	0.20001	0.150275
2066-10-03 12:00:00	0.249559	0.372197	0.188465
2066-11-03	0.17608	0.0785219	0.0619673
2066-12-03 12:00:00	0.372076	0.143813	0.125385
2067-01-03 12:00:00	0.0725287	0.0557113	0.0603063
2067-02-02	0.066494	0.0496615	0.0784528
2067-03-03 12:00:00	0.0753557	0.0638207	0.0778363
2067-04-03	0.185193	0.183182	0.258159
2067-05-03 12:00:00	0.234798	0.137861	0.155075
2067-06-03	0.250589	0.186122	0.156638
2067-07-03 12:00:00	0.647804	0.27908	0.370221
2067-08-03 12:00:00	0.22526	0.191267	0.180878
2067-09-03	0.127713	0.141754	0.114155
2067-10-03 12:00:00	0.461185	0.412184	0.299547
2067-11-03	0.225938	0.203862	0.155861
2067-12-03 12:00:00	0.430344	0.248895	0.198452
2068-01-03 12:00:00	0.423186	0.101217	0.102635
2068-02-02	0.0623632	0.0507723	0.0360778
2068-03-02 12:00:00	0.0769491	0.075532	0.0773185
2068-04-02	0.202794	0.117083	0.221392
2068-05-02 12:00:00	0.369464	0.195989	0.300208
2068-06-02	0.150986	0.11302	0.0912633
2068-07-02 12:00:00	0.0888592	0.148961	0.241825
2068-08-02 12:00:00	0.532136	0.418611	0.308663
2068-09-02	0.52116	0.172993	0.349796
2068-10-02 12:00:00	0.148286	0.195387	0.184051
2068-11-02	0.155629	0.0746366	0.123573
2068-12-02 12:00:00	0.356781	0.23585	0.148395
2069-01-02 12:00:00	0.345841	0.513343	0.373666
2069-02-01	0.146313	0.0897603	0.116838
2069-03-02 12:00:00	0.0998698	0.0662531	0.124137
2069-04-02	0.0927329	0.0818251	0.116326
2069-05-02 12:00:00	0.13953	0.147449	0.12186
2069-06-02	0.513752	0.173296	0.226984
2069-07-02 12:00:00	0.762645	0.432781	0.392264
2069-08-02 12:00:00	0.342217	0.156244	0.227844
2069-09-02	0.244183	0.249871	0.3628
2069-10-02 12:00:00	0.409167	0.263611	0.306052
2069-11-02	0.160872	0.087048	0.0836575
2069-12-02 12:00:00	0.200102	0.0824758	0.0659053
2070-01-02 12:00:00	0.0403436	0.0401616	0.0342464
2070-02-01	0.108121	0.102524	0.115747
2070-03-02 12:00:00	0.0990628	0.0832488	0.110432
2070-04-02	0.152971	0.178118	0.238216
2070-05-02 12:00:00	0.362713	0.127258	0.166327
2070-06-02	0.916343	0.2935	0.352428
2070-07-02 12:00:00	0.228194	0.222546	0.520368
2070-08-02 12:00:00	0.583408	0.442469	0.468774
2070-09-02	0.274569	0.158832	0.167015
2070-10-02 12:00:00	0.0880407	0.252328	0.16301
2070-11-02	0.100544	0.124971	0.163869
2070-12-02 12:00:00	0.157048	0.106924	0.0603767
2071-01-02 12:00:00	0.212857	0.145022	0.12327
2071-02-01	0.0567535	0.0689742	0.0936853
2071-03-02 12:00:00	0.0637713	0.042515	0.0559568
2071-04-02	0.120846	0.0907945	0.110826
2071-05-02 12:00:00	0.200115	0.10166	0.188232
2071-06-02	0.25509	0.12774	0.172559
2071-07-02 12:00:00	0.525	0.201379	0.36647
2071-08-02 12:00:00	0.224846	0.151854	0.186966
2071-09-02	0.100805	0.18846	0.200359
2071-10-02 12:00:00	0.131571	0.124236	0.221874
2071-11-02	0.245451	0.213858	0.223769
2071-12-02 12:00:00	0.316628	0.153755	0.129606
2072-01-02 12:00:00	0.103126	0.0619035	0.0607948
2072-02-01	0.0874816	0.0586031	0.0496052
2072-03-01 12:00:00	0.0985149	0.0816038	0.136597
2072-04-01	0.318658	0.212863	0.171493
2072-05-01 12:00:00	0.425576	0.226918	0.213974
2072-06-01	0.0790972	0.0788001	0.130671
2072-07-01 12:00:00	0.161031	0.112923	0.16665
2072-08-01 12:00:00	0.178368	0.178484	0.271518
2072-09-01	0.289276	0.362996	0.433496
2072-10-01 12:00:00	0.0770631	0.145711	0.126064
2072-11-01	0.104878	0.0810478	0.0798589
2072-12-01 12:00:00	0.0813043	0.0874956	0.127964
2073-01-01 12:00:00	0.126915	0.0888146	0.0750993
2073-01-31	0.0727957	0.0570951	0.0690931
2073-03-01 12:00:00	0.313175	0.138243	0.104861
2073-04-01	0.138915	0.120432	0.152092
2073-05-01 12:00:00	0.160939	0.152146	0.233864
2073-06-01	0.280537	0.127312	0.110786
2073-07-01 12:00:00	0.387336	0.375234	0.747268
2073-08-01 12:00:00	0.120488	0.590586	0.362477
2073-09-01	0.316917	0.198582	0.26933
2073-10-01 12:00:00	0.246296	0.364095	0.15301
2073-11-01	0.228652	0.192952	0.239085
2073-12-01 12:00:00	0.127349	0.0701408	0.0626121
2074-01-01 12:00:00	0.194592	0.104127	0.0501943
2074-01-31	0.0420414	0.0408878	0.0608885
2074-03-01 12:00:00	0.14654	0.126089	0.113497
2074-04-01	0.0846564	0.169569	0.140244
2074-05-01 12:00:00	0.271022	0.106516	0.128131
2074-06-01	0.691738	0.236671	0.432759
2074-07-01 12:00:00	0.171768	0.274056	0.224643
2074-08-01 12:00:00	0.460156	0.302952	0.462391
2074-09-01	0.119821	0.0889359	0.209211
2074-10-01 12:00:00	0.123145	0.0941081	0.153745
2074-11-01	0.360334	0.171965	0.140576
2074-12-01 12:00:00	0.130341	0.0819168	0.0618944
2075-01-01 12:00:00	0.0768712	0.0539843	0.043484
2075-01-31	0.0713137	0.0597064	0.0772416
2075-03-01 12:00:00	0.0610171	0.0425452	0.0629927
2075-04-01	0.115295	0.103403	0.137406
2075-05-01 12:00:00	0.184699	0.142805	0.194784
2075-06-01	0.0994315	0.0811683	0.101654
2075-07-01 12:00:00	0.445147	0.209324	0.142102
2075-08-01 12:00:00	0.280183	0.118464	0.254892
2075-09-01	0.284089	0.17248	0.192691
2075-10-01 12:00:00	0.178585	0.0781283	0.115456
2075-11-01	0.227834	0.214516	0.217942
2075-12-01 12:00:00	0.154128	0.0757647	0.0374355
2076-01-01 12:00:00	0.13459	0.108851	0.101357
2076-01-31	0.0982754	0.070357	0.0541972
2076-02-29 12:00:00	0.200545	0.13272	0.160141
2076-03-31	0.103569	0.126006	0.142344
2076-04-30 12:00:00	0.268305	0.116834	0.183146
2076-05-31	0.19689	0.220291	0.20334
2076-06-30 12:00:00	0.168865	0.0766153	0.172676
2076-07-31 12:00:00	0.316482	0.294464	0.377378
2076-08-31	0.266817	0.247763	0.320739
2076-09-30 12:00:00	0.184856	0.472117	0.244805
2076-10-31	0.0894558	0.0625632	0.0777151
2076-11-30 12:00:00	0.195109	0.158222	0.119494
2076-12-31 12:00:00	0.0986544	0.0749112	0.0648801
2077-01-30	0.0911223	0.110988	0.0572178
2077-02-28 12:00:00	0.179634	0.0974358	0.133153
2077-03-31	0.081599	0.0618007	0.0779595
2077-04-30 12:00:00	0.105676	0.104543	0.169697
2077-05-31	0.0976426	0.115884	0.0953523
2077-06-30 12:00:00	0.117504	0.208772	0.236082
2077-07-31 12:00:00	0.172387	0.155246	0.169771
2077-08-31	0.120767	0.139056	0.0902432
2077-09-30 12:00:00	0.148834	0.19028	0.278475
2077-10-31	0.143173	0.235403	0.181525
2077-11-30 12:00:00	0.138512	0.0882383	0.098062
2077-12-31 12:00:00	0.217139	0.0778139	0.0941669
2078-01-30	0.1256	0.164911	0.116327
2078-02-28 12:00:00	0.125747	0.0956745	0.134873
2078-03-31	0.0758701	0.071699	0.11912
2078-04-30 12:00:00	0.196298	0.10067	0.14184
2078-05-31	0.567232	0.357666	0.470416
2078-06-30 12:00:00	0.212434	0.160865	0.317757
2078-07-31 12:00:00	0.56904	0.458575	0.575259
2078-08-31	0.291766	0.549394	0.839658
2078-09-30 12:00:00	0.499189	0.150624	0.150981
2078-10-31	0.204243	0.108541	0.136792
2078-11-30 12:00:00	0.145565	0.122508	0.105099
2078-12-31 12:00:00	0.0621521	0.0437636	0.0328322
2079-01-30	0.079721	0.0855335	0.0836941
2079-02-28 12:00:00	0.12646	0.123248	0.112336
2079-03-31	0.160402	0.101581	0.15339
2079-04-30 12:00:00	0.507197	0.201837	0.260476
2079-05-31	0.0988572	0.136168	0.158129
2079-06-30 12:00:00	0.25142	0.111122	0.178787
2079-07-31 12:00:00	0.442502	0.34114	0.310393
2079-08-31	0.12931	0.067125	0.10099
2079-09-30 12:00:00	0.132567	0.18714	0.113731
2079-10-31	0.27902	0.22836	0.148857
2079-11-30 12:00:00	0.20787	0.187801	0.22624
2079-12-31 12:00:00	0.0917042	0.0745931	0.0701758
2080-01-30	0.199043	0.195163	0.0914466
2080-02-28 12:00:00	0.153949	0.113836	0.126787
2080-03-30	0.189673	0.128943	0.166722
2080-04-29 12:00:00	0.202857	0.112933	0.193942
2080-05-30	0.234132	0.162263	0.325606
2080-06-29 12:00:00	0.190002	0.15266	0.199684
2080-07-30 12:00:00	0.336672	0.3656	0.339957
2080-08-30	1.44306	0.166495	0.244247
2080-09-29 12:00:00	0.0994125	0.207489	0.186928
2080-10-30	0.268947	0.144437	0.0818148
2080-11-29 12:00:00	0.176994	0.139104	0.0825127
2080-12-30 12:00:00	0.21803	0.131004	0.0995232
2081-01-29	0.0801576	0.0943126	0.0901342
2081-02-27 12:00:00	0.159864	0.104147	0.129548
2081-03-30	0.0864445	0.0768906	0.0926974
2081-04-29 12:00:00	0.091299	0.0992857	0.126188
2081-05-30	0.17803	0.423511	0.339287
2081-06-29 12:00:00	0.229155	0.138039	0.25683
2081-07-30 12:00:00	0.372097	0.308845	0.219456
2081-08-30	0.216703	0.172653	0.353335
2081-09-29 12:00:00	0.193623	0.163295	0.131912
2081-10-30	0.655922	0.570187	0.271132
2081-11-29 12:00:00	0.281872	0.107584	0.0860758
2081-12-30 12:00:00	0.161644	0.124362	0.10756
2082-01-29	0.155095	0.166298	0.123422
2082-02-27 12:00:00	0.110663	0.100933	0.0908748
2082-03-30	0.117922	0.125141	0.170965
2082-04-29 12:00:00	0.144009	0.0700379	0.143437
2082-05-30	0.700874	0.170959	0.174651
2082-06-29 12:00:00	0.365511	0.227801	0.273312
2082-07-30 12:00:00	0.174755	0.304623	0.265341
2082-08-30	0.306259	0.166066	0.0929371
2082-09-29 12:00:00	0.143204	0.0742073	0.237189
2082-10-30	0.233372	0.110696	0.148731
2082-11-29 12:00:00	0.130296	0.0853109	0.106109
2082-12-30 12:00:00	0.224268	0.0688911	0.0725773
2083-01-29	0.162139	0.0744966	0.090663
2083-02-27 12:00:00	0.0810124	0.0563309	0.0871365
2083-03-30	0.110243	0.160744	0.120125
2083-04-29 12:00:00	0.155166	0.0990223	0.147506
2083-05-30	0.349065	0.188795	0.158697
2083-06-29 12:00:00	0.864622	0.229624	0.141244
2083-07-30 12:00:00	0.307658	0.331241	0.265238
2083-08-30	0.358466	0.159868	0.178436
2083-09-29 12:00:00	0.107743	0.0897779	0.151071
2083-10-30	0.341507	0.115492	0.260759
2083-11-29 12:00:00	0.29227	0.13764	0.0742203
2083-12-30 12:00:00	0.194484	0.127466	0.108122
2084-01-29	0.128765	0.0929232	0.139846
2084-02-27 12:00:00	0.126965	0.0699334	0.0785276
2084-03-29	0.196455	0.149174	0.157477
2084-04-28 12:00:00	0.163121	0.289551	0.250208
2084-05-29	0.294142	0.21543	0.259189
2084-06-28 12:00:00	0.459255	0.283758	0.468657
2084-07-29 12:00:00	0.106062	0.123161	0.191091
2084-08-29	0.189578	0.250708	0.118477
2084-09-28 12:00:00	0.532889	0.24699	0.161743
2084-10-29	0.174208	0.199226	0.109359
2084-11-28 12:00:00	0.254029	0.104152	0.0797719
2084-12-29 12:00:00	0.151299	0.097661	0.0710035
2085-01-28	0.124255	0.125716	0.0903403
2085-02-26 12:00:00	0.109796	0.110841	0.109687
2085-03-29	0.348743	0.141067	0.170975
2085-04-28 12:00:00	0.0988829	0.0910091	0.158711
2085-05-29	0.599694	0.200379	0.254678
2085-06-28 12:00:00	0.226772	0.140732	0.200446
2085-07-29 12:00:00	0.224483	0.266101	0.452162
2085-08-29	0.161472	0.142565	0.198917
2085-09-28 12:00:00	0.132294	0.10589	0.175507
2085-10-29	0.133493	0.175014	0.116842
2085-11-28 12:00:00	0.363576	0.205178	0.189531
2085-12-29 12:00:00	0.0869933	0.0615003	0.133921
2086-01-28	0.0703205	0.0566524	0.106507
2086-02-26 12:00:00	0.197871	0.128423	0.148059
2086-03-29	0.161777	0.103657	0.163168
2086-04-28 12:00:00	0.332392	0.223954	0.19692
2086-05-29	0.353505	0.197526	0.271795
2086-06-28 12:00:00	0.437262	0.211975	0.189587
2086-07-29 12:00:00	0.169933	0.154425	0.159339
2086-08-29	0.158728	0.244004	0.181099
2086-09-28 12:00:00	0.175745	0.139276	0.155973
2086-10-29	0.0780926	0.11373	0.0818762
2086-11-28 12:00:00	0.22092	0.155416	0.140244
2086-12-29 12:00:00	0.0977845	0.0618662	0.0815053
2087-01-28	0.151466	0.0824771	0.119838
2087-02-26 12:00:00	0.0428523	0.0541924	0.052352
2087-03-29	0.162117	0.129601	0.188227
2087-04-28 12:00:00	0.2896	0.150802	0.184736
2087-05-29	0.0506274	0.0688388	0.0813041
2087-06-28 12:00:00	0.127048	0.175755	0.282804
2087-07-29 12:00:00	0.493925	0.325038	0.333745
2087-08-29	0.0731548	0.134487	0.137795
2087-09-28 12:00:00	0.080062	0.0589217	0.127215
2087-10-29	0.187365	0.126717	0.150975
2087-11-28 12:00:00	0.25211	0.070582	0.0475621
2087-12-29 12:00:00	0.321016	0.218547	0.171242
2088-01-28	0.118009	0.083701	0.0887947
2088-02-26 12:00:00	0.158468	0.0821604	0.123364
2088-03-28	0.34437	0.146372	0.16676
2088-04-27 12:00:00	0.0854527	0.0825958	0.102786
2088-05-28	0.161999	0.105656	0.177742
2088-06-27 12:00:00	0.48799	0.248658	0.243066
2088-07-28 12:00:00	0.186716	0.265983	0.20909
2088-08-28	0.0670187	0.0837175	0.070046
2088-09-27 12:00:00	0.179143	0.327025	0.253005
2088-10-28	0.18438	0.140115	0.128391
2088-11-27 12:00:00	0.069222	0.0598247	0.0494998
2088-12-28 12:00:00	0.116111	0.0801731	0.0637367
2089-01-27	0.0567354	0.0519541	0.0535218
2089-02-25 12:00:00	0.170385	0.1191	0.172218
2089-03-28	0.0764488	0.0651083	0.0929697
2089-04-27 12:00:00	0.134054	0.0939752	0.104462
2089-05-28	0.103498	0.12002	0.223159
2089-06-27 12:00:00	0.71406	0.303835	0.526368
2089-07-28 12:00:00	0.302901	0.187236	0.395529
2089-08-28	0.226863	0.142101	0.204981
2089-09-27 12:00:00	0.0973501	0.108389	0.1619
2089-10-28	0.237918	0.154901	0.181988
2089-11-27 12:00:00	0.226505	0.154254	0.129173
2089-12-28 12:00:00	0.113618	0.122105	0.112967
2090-01-27	0.0990188	0.099339	0.132613
2090-02-25 12:00:00	0.203247	0.209144	0.149262
2090-03-28	0.183994	0.185635	0.173183
2090-04-27 12:00:00	0.0835826	0.094914	0.112835
2090-05-28	0.382183	0.232049	0.181395
2090-06-27 12:00:00	0.285534	0.224542	0.226454
2090-07-28 12:00:00	0.554414	0.489589	0.375927
2090-08-28	0.217947	0.101494	0.114571
2090-09-27 12:00:00	0.119553	0.242912	0.218931
2090-10-28	0.160503	0.169691	0.203905
2090-11-27 12:00:00	0.330437	0.208132	0.0672711
2090-12-28 12:00:00	0.0750192	0.126397	0.0657925
2091-01-27	0.136073	0.130621	0.0880315
2091-02-25 12:00:00	0.0944303	0.0677819	0.116368
2091-03-28	0.0951884	0.0650712	0.0684378
2091-04-27 12:00:00	0.150242	0.247792	0.22407
2091-05-28	0.233962	0.167355	0.120151
2091-06-27 12:00:00	0.25589	0.208306	0.167431
2091-07-28 12:00:00	0.280095	0.16577	0.191499
2091-08-28	0.26273	0.373917	0.590774
2091-09-27 12:00:00	0.362344	0.237521	0.1067
2091-10-28	0.154822	0.105806	0.0944196
2091-11-27 12:00:00	0.367567	0.228217	0.174166
2091-12-28 12:00:00	0.0737507	0.0888329	0.0992941
2092-01-27	0.145486	0.106166	0.143389
2092-02-25 12:00:00	0.0730213	0.0732289	0.0803109
2092-03-27	0.112231	0.0894969	0.131104
2092-04-26 12:00:00	0.234228	0.145783	0.194417
2092-05-27	0.199063	0.127905	0.125326
2092-06-26 12:00:00	0.251522	0.318113	0.300094
2092-07-27 12:00:00	0.246556	0.130249	0.16569
2092-08-27	0.571549	0.401619	0.513406
2092-09-26 12:00:00	0.361462	0.164686	0.212209
2092-10-27	0.256394	0.160098	0.114937
2092-11-26 12:00:00	0.228177	0.269291	0.103834
2092-12-27 12:00:00	0.224157	0.183062	0.153865
2093-01-26	0.562268	0.128208	0.0859939
2093-02-24 12:00:00	0.117182	0.0662552	0.0889967
2093-03-27	0.111998	0.126913	0.142299
2093-04-26 12:00:00	0.118691	0.1636	0.127714
2093-05-27	0.286695	0.183947	0.283014
2093-06-26 12:00:00	0.453497	0.402114	0.511587
2093-07-27 12:00:00	0.292395	0.183594	0.226246
2093-08-27	0.263388	0.38966	0.396863
2093-09-26 12:00:00	0.111029	0.100113	0.115197
2093-10-27	0.164591	0.220372	0.280456
2093-11-26 12:00:00	0.239474	0.172337	0.16457
2093-12-27 12:00:00	0.109404	0.093294	0.035339
2094-01-26	0.129981	0.125477	0.120991
2094-02-24 12:00:00	0.104484	0.0818589	0.116529
2094-03-27	0.103808	0.0980025	0.129483
2094-04-26 12:00:00	0.209035	0.13487	0.196089
2094-05-27	0.107771	0.0885452	0.114772
2094-06-26 12:00:00	0.509188	0.588988	0.445451
2094-07-27 12:00:00	0.260455	0.20156	0.435834
2094-08-27	0.153578	0.163509	0.381324
2094-09-26 12:00:00	0.163307	0.220834	0.37675
2094-10-27	0.249453	0.320871	0.209128
2094-11-26 12:00:00	0.342568	0.144213	0.111982
2094-12-27 12:00:00	0.0878337	0.0361587	0.0527877
2095-01-26	0.138245	0.133181	0.0995795
2095-02-24 12:00:00	0.146139	0.128883	0.16699
2095-03-27	0.116852	0.0864384	0.151007
2095-04-26 12:00:00	0.121134	0.168732	0.140388
2095-05-27	0.202092	0.158146	0.14322
2095-06-26 12:00:00	0.278417	0.200676	0.173689
2095-07-27 12:00:00	0.33305	0.143081	0.121595
2095-08-27	0.271624	0.259109	0.368657
2095-09-26 12:00:00	0.348661	0.268347	0.318463
2095-10-27	0.338433	0.242184	0.246891
2095-11-26 12:00:00	0.139353	0.150091	0.113528
2095-12-27 12:00:00	0.235474	0.29215	0.0951186
2096-01-26	0.0803516	0.0944946	0.085746
2096-02-24 12:00:00	0.110027	0.0654077	0.071136
2096-03-26	0.128081	0.143227	0.194935
2096-04-25 12:00:00	0.154801	0.120344	0.127542
2096-05-26	0.196698	0.27364	0.257423
2096-06-25 12:00:00	0.533859	0.272664	0.300536
2096-07-26 12:00:00	0.46253	0.239449	0.347358
2096-08-26	0.0714427	0.174876	0.180607
2096-09-25 12:00:00	0.181579	0.25966	0.29292
2096-10-26	0.107809	0.194672	0.132435
2096-11-25 12:00:00	0.157163	0.135571	0.106392
2096-12-26 12:00:00	0.0683083	0.059748	0.0539658
2097-01-25	0.0646334	0.0487339	0.0999675
2097-02-23 12:00:00	0.0696551	0.0682673	0.0707574
2097-03-26	0.088208	0.183619	0.180344
2097-04-25 12:00:00	0.301045	0.15217	0.18023
2097-05-26	0.194961	0.153989	0.203433
2097-06-25 12:00:00	0.392948	0.193825	0.169534
2097-07-26 12:00:00	0.319675	0.236418	0.305409
2097-08-26	0.143796	0.12386	0.188224
2097-09-25 12:00:00	0.0783835	0.0703503	0.118291
2097-10-26	0.22909	0.222532	0.30516
2097-11-25 12:00:00	0.264309	0.180302	0.158256
2097-12-26 12:00:00	0.157402	0.0579178	0.0563869
2098-01-25	0.143781	0.0792637	0.128506
2098-02-23 12:00:00	0.12899	0.0964562	0.103704
2098-03-26	0.318541	0.138232	0.159786
2098-04-25 12:00:00	0.454489	0.209488	0.223066
2098-05-26	0.155439	0.154193	0.370791
2098-06-25 12:00:00	0.188714	0.0795123	0.0820546
2098-07-26 12:00:00	0.262298	0.294569	0.398348
2098-08-26	0.274804	0.45023	0.485229
2098-09-25 12:00:00	0.215158	0.132418	0.143834
2098-10-26	0.22207	0.123695	0.16356
2098-11-25 12:00:00	0.109581	0.099975	0.155035
2098-12-26 12:00:00	0.212802	0.119095	0.136924
2099-01-25	0.0881659	0.0859524	0.100948
2099-02-23 12:00:00	0.186859	0.105822	0.199883
2099-03-26	0.211618	0.191508	0.502042
2099-04-25 12:00:00	0.324901	0.22533	0.152921
2099-05-26	0.228927	0.315175	0.328325
2099-06-25 12:00:00	0.274701	0.215908	0.275572
2099-07-26 12:00:00	0.868049	0.352876	0.317158
2099-08-26	0.32904	0.394672	0.297966
2099-09-25 12:00:00	0.078182	0.0731282	0.0567716
2099-10-26	0.287914	0.284	0.249898
2099-11-25 12:00:00	0.266326	0.132858	0.184329

## Sheet: Table SF3
Time	East Coast	Pearl River Delta	West Coast
2015-01-16	0.00062262	0.00062282	0.000624166
2015-02-15	0.000622151	0.000621366	0.000622221
2015-03-16	0.000620254	0.000616599	0.000618315
2015-04-16	0.000621102	0.000619055	0.000621078
2015-05-16	0.000626968	0.000620263	0.000622008
2015-06-16	0.000619518	0.000619559	0.00062366
2015-07-16	0.000618369	0.000620032	0.00062082
2015-08-16	0.000618174	0.000616731	0.000618799
2015-09-16	0.000621107	0.000619776	0.000619146
2015-10-16	0.000624335	0.000625838	0.000630488
2015-11-16	0.000626978	0.000635394	0.000636601
2015-12-16	0.000627335	0.000632336	0.000633271
2016-01-16	0.000629311	0.000631425	0.000630543
2016-02-15	0.000627027	0.00062703	0.000629281
2016-03-15	0.000624024	0.000621685	0.000623168
2016-04-15	0.000625863	0.000628407	0.00062901
2016-05-15	0.000624337	0.000621402	0.000623367
2016-06-15	0.000619712	0.000619844	0.000623065
2016-07-15	0.000623176	0.000617957	0.000620569
2016-08-15	0.000623443	0.000620585	0.000623269
2016-09-15	0.000624774	0.000624992	0.000622576
2016-10-15	0.000629835	0.000629495	0.000629259
2016-11-15	0.000633496	0.000633794	0.000637463
2016-12-15	0.000633825	0.000639444	0.000639147
2017-01-15	0.000631618	0.000634493	0.000635895
2017-02-14	0.000636354	0.000637317	0.00063661
2017-03-15	0.000628967	0.000627869	0.000630641
2017-04-15	0.000630293	0.00062957	0.000630424
2017-05-15	0.000629959	0.000627134	0.000630869
2017-06-15	0.000627227	0.000626425	0.000633508
2017-07-15	0.000629404	0.00062717	0.000628412
2017-08-15	0.00062278	0.000620793	0.000622393
2017-09-15	0.000627623	0.000625372	0.00062813
2017-10-15	0.000635165	0.000638594	0.000639924
2017-11-15	0.000635731	0.000638393	0.000636389
2017-12-15	0.000635094	0.000636859	0.000636755
2018-01-15	0.000634247	0.000639336	0.000638784
2018-02-14	0.000636955	0.0006372	0.000640168
2018-03-15	0.000632137	0.000629894	0.000634026
2018-04-15	0.0006338	0.000626266	0.000631358
2018-05-15	0.000631569	0.000629027	0.000630694
2018-06-15	0.000635815	0.000631148	0.000630865
2018-07-15	0.000630715	0.000631812	0.000632006
2018-08-15	0.000627272	0.00062833	0.000632385
2018-09-15	0.000630542	0.000632946	0.00063312
2018-10-15	0.000634663	0.000633554	0.000633265
2018-11-15	0.000643677	0.000648598	0.000648713
2018-12-15	0.0006497	0.000652957	0.000649347
2019-01-15	0.000649175	0.000646168	0.000644898
2019-02-14	0.00063931	0.000640419	0.000641952
2019-03-15	0.000640946	0.000637826	0.00063821
2019-04-15	0.00063564	0.000632772	0.000636335
2019-05-15	0.000643185	0.000641116	0.000646245
2019-06-15	0.000637319	0.000636101	0.000635611
2019-07-15	0.000636544	0.000631772	0.000633902
2019-08-15	0.000640326	0.000640641	0.00064513
2019-09-15	0.000635575	0.000634977	0.000636981
2019-10-15	0.000639822	0.000643727	0.000646253
2019-11-15	0.000648138	0.000649294	0.000649074
2019-12-15	0.000648531	0.000653308	0.000656419
2020-01-15	0.000644444	0.000648385	0.000649411
2020-02-14	0.00064328	0.000643713	0.000645288
2020-03-14	0.000649336	0.000648977	0.000652074
2020-04-14	0.000639727	0.000636066	0.000637512
2020-05-14	0.000642275	0.000639019	0.000642352
2020-06-14	0.000640401	0.000638329	0.000641792
2020-07-14	0.000641571	0.000642194	0.000645673
2020-08-14	0.000641473	0.000640524	0.000642631
2020-09-14	0.000643488	0.000643428	0.000643238
2020-10-14	0.000644766	0.000648875	0.000647583
2020-11-14	0.000648617	0.000658198	0.000658082
2020-12-14	0.000652086	0.000656991	0.00065652
2021-01-14	0.000651477	0.000653344	0.000654935
2021-02-13	0.000651539	0.000649771	0.000650682
2021-03-14	0.000649472	0.000647316	0.00064739
2021-04-14	0.000645543	0.000642579	0.000645603
2021-05-14	0.000652986	0.000648453	0.000651567
2021-06-14	0.000642206	0.000641021	0.000643009
2021-07-14	0.000643479	0.000639684	0.000644713
2021-08-14	0.000648747	0.000647014	0.00064991
2021-09-14	0.00064717	0.000650023	0.000649861
2021-10-14	0.000651104	0.000652974	0.000651304
2021-11-14	0.000650937	0.00065396	0.000657163
2021-12-14	0.00065765	0.00066313	0.000670464
2022-01-14	0.000656869	0.000654681	0.00065582
2022-02-13	0.000653647	0.000652525	0.000653515
2022-03-14	0.000653761	0.000652818	0.000659102
2022-04-14	0.000651364	0.000650722	0.000653331
2022-05-14	0.000652176	0.00064931	0.000651209
2022-06-14	0.000650116	0.000647489	0.000648334
2022-07-14	0.000654338	0.000649413	0.000652764
2022-08-14	0.000650824	0.000651838	0.00065713
2022-09-14	0.000654076	0.00065406	0.00065226
2022-10-14	0.000656344	0.000660354	0.000665121
2022-11-14	0.000665645	0.000673375	0.000674167
2022-12-14	0.000668824	0.000673873	0.000674208
2023-01-14	0.000661512	0.000661609	0.000663283
2023-02-13	0.00066581	0.000669539	0.000668376
2023-03-14	0.000661665	0.000662161	0.000664898
2023-04-14	0.000664982	0.000658916	0.000659576
2023-05-14	0.000659477	0.000654671	0.000656904
2023-06-14	0.000658717	0.000656575	0.000658462
2023-07-14	0.000661049	0.000653635	0.000656183
2023-08-14	0.000655368	0.000654651	0.000655978
2023-09-14	0.000654449	0.000653698	0.000654131
2023-10-14	0.000661336	0.000661833	0.00066302
2023-11-14	0.000668542	0.000672816	0.000673844
2023-12-14	0.000668203	0.000671595	0.000671342
2024-01-14	0.000669907	0.000674051	0.000671756
2024-02-13	0.000667835	0.000671557	0.000672272
2024-03-13	0.000668862	0.000668654	0.000672443
2024-04-13	0.000661141	0.000659089	0.000660249
2024-05-13	0.00066439	0.000659908	0.000662873
2024-06-13	0.000660974	0.000660884	0.000663247
2024-07-13	0.000656757	0.000654287	0.000657566
2024-08-13	0.000663894	0.000661205	0.000663057
2024-09-13	0.00066671	0.000661099	0.000660836
2024-10-13	0.000667854	0.00067162	0.000673475
2024-11-13	0.00066868	0.000671604	0.000673533
2024-12-13	0.000671916	0.000674939	0.000677383
2025-01-13	0.000671169	0.000672433	0.000672426
2025-02-12	0.000672389	0.000673879	0.000675135
2025-03-13	0.000668034	0.000667112	0.000667961
2025-04-13	0.000670169	0.000669529	0.00066924
2025-05-13	0.000669084	0.000664642	0.000667505
2025-06-13	0.000666535	0.00066306	0.000664306
2025-07-13	0.000666298	0.000663921	0.00066522
2025-08-13	0.000665472	0.000663859	0.000665902
2025-09-13	0.00066818	0.000669094	0.000669121
2025-10-13	0.00067038	0.000672798	0.000672438
2025-11-13	0.000678164	0.000685114	0.00068127
2025-12-13	0.000681151	0.000688272	0.000688542
2026-01-13	0.000684643	0.000690294	0.000686328
2026-02-12	0.000678278	0.000676509	0.000677
2026-03-13	0.000671113	0.000670788	0.000673924
2026-04-13	0.000672755	0.000668638	0.000673323
2026-05-13	0.000672995	0.000669818	0.00067252
2026-06-13	0.000671689	0.000666462	0.000670954
2026-07-13	0.000669358	0.000668846	0.000669331
2026-08-13	0.000670244	0.000668172	0.000669299
2026-09-13	0.000674149	0.000673988	0.000673796
2026-10-13	0.000673925	0.000669179	0.000671593
2026-11-13	0.000686241	0.000687258	0.000689329
2026-12-13	0.000688022	0.000690057	0.000689001
2027-01-13	0.00068572	0.00068948	0.000691884
2027-02-12	0.000685422	0.000684671	0.000685226
2027-03-13	0.000684042	0.000680485	0.00068208
2027-04-13	0.000678052	0.000671699	0.000674298
2027-05-13	0.000681139	0.000678039	0.000680812
2027-06-13	0.000680512	0.000673973	0.000678312
2027-07-13	0.000677262	0.000674409	0.000674911
2027-08-13	0.000681877	0.000681074	0.000683212
2027-09-13	0.00068313	0.000685686	0.000687391
2027-10-13	0.000683674	0.00068702	0.000689172
2027-11-13	0.00068713	0.000692681	0.000696151
2027-12-13	0.000689747	0.000694239	0.000692177
2028-01-13	0.000687211	0.000688523	0.000689562
2028-02-12	0.000686277	0.000687243	0.000688144
2028-03-12	0.000687569	0.000688612	0.00068826
2028-04-12	0.000687124	0.000687143	0.000686109
2028-05-12	0.000684046	0.000678699	0.000680928
2028-06-12	0.000683817	0.000681574	0.000681939
2028-07-12	0.000685623	0.000681151	0.000683215
2028-08-12	0.000683244	0.000682935	0.000690294
2028-09-12	0.000683835	0.00067972	0.000684167
2028-10-12	0.000688041	0.000692636	0.000691321
2028-11-12	0.000691533	0.000694871	0.00069951
2028-12-12	0.000701594	0.000710692	0.000703699
2029-01-12	0.000691343	0.000695644	0.000694695
2029-02-11	0.00068948	0.00068996	0.000689988
2029-03-12	0.000691056	0.000687633	0.000687941
2029-04-12	0.00069013	0.000687186	0.000688382
2029-05-12	0.000687576	0.000687535	0.000690683
2029-06-12	0.00068627	0.00068353	0.000684492
2029-07-12	0.000685837	0.000687003	0.000686188
2029-08-12	0.000700849	0.000697175	0.000695803
2029-09-12	0.000689265	0.000689685	0.000690453
2029-10-12	0.000693935	0.000692288	0.000695622
2029-11-12	0.000706163	0.000712539	0.000710854
2029-12-12	0.000700314	0.000703952	0.000701721
2030-01-12	0.000704184	0.000707397	0.000705626
2030-02-11	0.000701236	0.000704825	0.000704604
2030-03-12	0.000702164	0.000701486	0.000702933
2030-04-12	0.000698576	0.000698704	0.000699627
2030-05-12	0.000700511	0.000694447	0.000696574
2030-06-12	0.000697139	0.000693803	0.00070099
2030-07-12	0.000696425	0.000691572	0.000694179
2030-08-12	0.000696782	0.000692574	0.000695575
2030-09-12	0.000696733	0.000694395	0.000695991
2030-10-12	0.000696776	0.000703464	0.000703722
2030-11-12	0.000704467	0.000698379	0.000704166
2030-12-12	0.000707294	0.000712538	0.000711619
2031-01-12	0.000703986	0.000707736	0.000708253
2031-02-11	0.00071189	0.000715214	0.000716297
2031-03-12	0.000705254	0.000703663	0.000705028
2031-04-12	0.000706804	0.00070346	0.000707174
2031-05-12	0.000701338	0.000699267	0.000704145
2031-06-12	0.000705406	0.000700038	0.000702143
2031-07-12	0.000706458	0.000698676	0.000700536
2031-08-12	0.000699754	0.00070021	0.000700244
2031-09-12	0.000706582	0.00070215	0.000704718
2031-10-12	0.00070359	0.000712137	0.000712306
2031-11-12	0.000715565	0.000721131	0.000715229
2031-12-12	0.000711845	0.000714919	0.000713095
2032-01-12	0.000711829	0.000713251	0.000713568
2032-02-11	0.000712281	0.000710857	0.000712153
2032-03-11	0.000713315	0.000711987	0.000712198
2032-04-11	0.000707269	0.000704591	0.000705796
2032-05-11	0.00070567	0.000706474	0.000708552
2032-06-11	0.000706081	0.000707847	0.000717446
2032-07-11	0.000707825	0.000705712	0.000709061
2032-08-11	0.00070612	0.000707446	0.000709061
2032-09-11	0.000708126	0.000703572	0.000707092
2032-10-11	0.000712815	0.000719879	0.000721973
2032-11-11	0.000718566	0.000721987	0.000723372
2032-12-11	0.000719918	0.000725559	0.000723168
2033-01-11	0.000721361	0.000723095	0.000725715
2033-02-10	0.000720512	0.000725072	0.000724141
2033-03-11	0.000717811	0.000714883	0.000715971
2033-04-11	0.000714169	0.000709996	0.000712998
2033-05-11	0.000710739	0.000708987	0.000713182
2033-06-11	0.000715003	0.000714326	0.000718503
2033-07-11	0.00071281	0.000716342	0.00071601
2033-08-11	0.000714259	0.00070976	0.000712452
2033-09-11	0.000711433	0.000710985	0.000713325
2033-10-11	0.000717849	0.000721847	0.000720402
2033-11-11	0.000722354	0.000728697	0.00072761
2033-12-11	0.000724933	0.000732584	0.000741488
2034-01-11	0.00072599	0.000732024	0.000733748
2034-02-10	0.000723922	0.000718382	0.000720421
2034-03-11	0.000723428	0.000721888	0.000722292
2034-04-11	0.000721322	0.000717177	0.000718519
2034-05-11	0.000719183	0.000717961	0.00071995
2034-06-11	0.000724567	0.000720379	0.00072278
2034-07-11	0.000717141	0.000713663	0.000718266
2034-08-11	0.000713416	0.000714549	0.000719212
2034-09-11	0.000718925	0.000722574	0.000718409
2034-10-11	0.000720144	0.000723556	0.000724383
2034-11-11	0.0007272	0.000728477	0.000732467
2034-12-11	0.000734722	0.000740019	0.00073957
2035-01-11	0.000728819	0.000736986	0.000735472
2035-02-10	0.000727133	0.000727981	0.000729052
2035-03-11	0.000724744	0.000724776	0.000724388
2035-04-11	0.00073019	0.000727044	0.000729621
2035-05-11	0.000725359	0.000720755	0.000725218
2035-06-11	0.00072021	0.000719917	0.000721831
2035-07-11	0.000723849	0.000722566	0.00072654
2035-08-11	0.00072287	0.000721738	0.000726788
2035-09-11	0.000728121	0.000727582	0.000725469
2035-10-11	0.000726052	0.000728118	0.000727434
2035-11-11	0.000732	0.00073467	0.000737264
2035-12-11	0.000735795	0.000739276	0.000738591
2036-01-11	0.000730953	0.000731729	0.000732606
2036-02-10	0.000737313	0.000743043	0.000741866
2036-03-10	0.000731685	0.000730288	0.00073209
2036-04-10	0.000730291	0.000726277	0.000730329
2036-05-10	0.000727784	0.000723661	0.000725015
2036-06-10	0.000731673	0.000727409	0.000730457
2036-07-10	0.000738345	0.000728367	0.00073062
2036-08-10	0.000732294	0.000724764	0.000727156
2036-09-10	0.00073681	0.000736858	0.000733842
2036-10-10	0.000733968	0.00073753	0.00073772
2036-11-10	0.00074036	0.000743327	0.000755947
2036-12-10	0.000742931	0.000747024	0.000745198
2037-01-10	0.000741776	0.000743919	0.000745075
2037-02-09	0.000744691	0.000750504	0.000748176
2037-03-10	0.000736994	0.000742191	0.000744705
2037-04-10	0.000733327	0.000732443	0.000733911
2037-05-10	0.000736681	0.000736848	0.000737708
2037-06-10	0.000739756	0.0007398	0.000742823
2037-07-10	0.000738002	0.000733503	0.000736833
2037-08-10	0.00074004	0.00073496	0.00073926
2037-09-10	0.000735239	0.000735212	0.000733592
2037-10-10	0.000740908	0.000742057	0.000743015
2037-11-10	0.000743823	0.000748837	0.000749244
2037-12-10	0.000745014	0.000752259	0.000750374
2038-01-10	0.000742238	0.00074395	0.000744694
2038-02-09	0.000747921	0.000751689	0.000751482
2038-03-10	0.00074351	0.000744445	0.000743197
2038-04-10	0.000741791	0.000739997	0.000739668
2038-05-10	0.00074521	0.000743345	0.000744486
2038-06-10	0.000737939	0.000734975	0.000737041
2038-07-10	0.000741349	0.000736557	0.000739462
2038-08-10	0.000744664	0.000738063	0.000742419
2038-09-10	0.000740005	0.000745264	0.000748121
2038-10-10	0.000747905	0.000749584	0.000750076
2038-11-10	0.000747281	0.000748431	0.000748638
2038-12-10	0.000756371	0.000761039	0.000756585
2039-01-10	0.000758114	0.00075935	0.000759748
2039-02-09	0.000750399	0.000749903	0.000751824
2039-03-10	0.000749964	0.000749598	0.000749405
2039-04-10	0.000748796	0.000747845	0.000749818
2039-05-10	0.000746893	0.000745242	0.000747435
2039-06-10	0.0007424	0.000741281	0.000746419
2039-07-10	0.000744959	0.000742862	0.000745207
2039-08-10	0.00074257	0.000740852	0.000744153
2039-09-10	0.000746661	0.000749062	0.000747335
2039-10-10	0.000751902	0.000757004	0.000757052
2039-11-10	0.000761439	0.000762473	0.000760875
2039-12-10	0.000757144	0.000760723	0.000763463
2040-01-10	0.000762125	0.000763339	0.000769078
2040-02-09	0.00075989	0.000758153	0.000760762
2040-03-09	0.000759815	0.000754004	0.00075565
2040-04-09	0.000752504	0.000749837	0.00075122
2040-05-09	0.00075272	0.000747641	0.000751262
2040-06-09	0.000752347	0.000750402	0.000752266
2040-07-09	0.000749894	0.000750835	0.000754445
2040-08-09	0.000750726	0.000749713	0.000754905
2040-09-09	0.000760021	0.000761683	0.000760061
2040-10-09	0.000760217	0.000757911	0.000759918
2040-11-09	0.000762611	0.000766801	0.000764852
2040-12-09	0.000765941	0.000772662	0.00077572
2041-01-09	0.000764631	0.00076732	0.000769513
2041-02-08	0.000765998	0.000765612	0.000766339
2041-03-09	0.00076261	0.000762968	0.000763718
2041-04-09	0.000764324	0.000760043	0.000761769
2041-05-09	0.000759916	0.000756251	0.000760915
2041-06-09	0.000761622	0.000756178	0.000760619
2041-07-09	0.000757928	0.000755249	0.000756268
2041-08-09	0.000758748	0.000753873	0.000755329
2041-09-09	0.000764205	0.000757947	0.000759568
2041-10-09	0.000762396	0.000766967	0.000771227
2041-11-09	0.000765936	0.000769032	0.00077282
2041-12-09	0.000770366	0.000773333	0.000774102
2042-01-09	0.000766693	0.000768108	0.0007701
2042-02-08	0.000767905	0.000769117	0.000768733
2042-03-09	0.000767411	0.000768226	0.000767693
2042-04-09	0.000767152	0.0007672	0.000766673
2042-05-09	0.000765363	0.000762906	0.000764224
2042-06-09	0.00076202	0.000761967	0.000762997
2042-07-09	0.000763467	0.00075898	0.00076246
2042-08-09	0.000767415	0.000759156	0.000761779
2042-09-09	0.000763422	0.000765375	0.000765056
2042-10-09	0.00076631	0.000765533	0.000766892
2042-11-09	0.000775065	0.000779266	0.000783995
2042-12-09	0.000780242	0.00078171	0.000778414
2043-01-09	0.000774311	0.000778296	0.000778079
2043-02-08	0.000776835	0.000781044	0.000779512
2043-03-09	0.000771686	0.000773934	0.000773619
2043-04-09	0.000767419	0.000765168	0.000767336
2043-05-09	0.000768409	0.000766501	0.000769234
2043-06-09	0.000771974	0.000768316	0.000773886
2043-07-09	0.000768846	0.000771148	0.000775181
2043-08-09	0.00076886	0.000764968	0.000769144
2043-09-09	0.000771482	0.000775081	0.000777147
2043-10-09	0.000776028	0.00077619	0.000777375
2043-11-09	0.000780295	0.000781305	0.000781172
2043-12-09	0.000783026	0.000785788	0.000782509
2044-01-09	0.000782812	0.000780767	0.000781144
2044-02-08	0.000780658	0.000783692	0.000784337
2044-03-08	0.000781182	0.000779789	0.000781809
2044-04-08	0.000781392	0.000780519	0.000783805
2044-05-08	0.00077653	0.000773128	0.000775529
2044-06-08	0.000776939	0.00077099	0.00077553
2044-07-08	0.000775601	0.000774758	0.000777066
2044-08-08	0.000776808	0.000774428	0.000777754
2044-09-08	0.000776721	0.000778631	0.000778424
2044-10-08	0.00077935	0.000780101	0.00078057
2044-11-08	0.000786999	0.000792676	0.000792514
2044-12-08	0.000790363	0.000790193	0.000791608
2045-01-08	0.000791614	0.000790351	0.000792975
2045-02-07	0.000789116	0.000788243	0.000789785
2045-03-08	0.000781375	0.000781479	0.000782784
2045-04-08	0.000781172	0.000782862	0.00078455
2045-05-08	0.000785886	0.000790724	0.000798281
2045-06-08	0.000785618	0.000779346	0.000783667
2045-07-08	0.000791236	0.000782301	0.000785044
2045-08-08	0.000795556	0.000783917	0.000787147
2045-09-08	0.000785603	0.00078291	0.000783174
2045-10-08	0.000787823	0.000792928	0.000794741
2045-11-08	0.000792656	0.000795705	0.000797206
2045-12-08	0.000796037	0.000805067	0.000804606
2046-01-08	0.000798163	0.000801157	0.000801078
2046-02-07	0.000791618	0.00079434	0.000795895
2046-03-08	0.000790852	0.000792915	0.000794011
2046-04-08	0.00078779	0.000786714	0.000788478
2046-05-08	0.000790061	0.000792402	0.000792391
2046-06-08	0.000788058	0.000789846	0.000789823
2046-07-08	0.000793366	0.000787763	0.000791316
2046-08-08	0.000787939	0.000785552	0.000790248
2046-09-08	0.000791797	0.000788264	0.000788812
2046-10-08	0.000793464	0.000797035	0.000796762
2046-11-08	0.000800512	0.000808266	0.000810207
2046-12-08	0.000803545	0.000806992	0.000810327
2047-01-08	0.000798304	0.000795947	0.000798478
2047-02-07	0.000802664	0.000803179	0.000803185
2047-03-08	0.000798042	0.000793067	0.000795731
2047-04-08	0.000797287	0.000796332	0.000800054
2047-05-08	0.000792428	0.000788841	0.000792706
2047-06-08	0.000791159	0.000789896	0.000796234
2047-07-08	0.000792676	0.000795533	0.000798752
2047-08-08	0.00079421	0.00079196	0.000798093
2047-09-08	0.000793792	0.000794201	0.00079449
2047-10-08	0.000796296	0.000800789	0.000802719
2047-11-08	0.000801208	0.00080245	0.00080681
2047-12-08	0.000803984	0.000807976	0.000808175
2048-01-08	0.000806836	0.000810834	0.000814158
2048-02-07	0.000806024	0.000802959	0.000802647
2048-03-07	0.000801068	0.000801405	0.000802825
2048-04-07	0.000802614	0.00079879	0.000800072
2048-05-07	0.000798805	0.000797602	0.000803023
2048-06-07	0.000798647	0.000793793	0.000796827
2048-07-07	0.000803294	0.000796258	0.000799011
2048-08-07	0.000798501	0.000796819	0.000797487
2048-09-07	0.000804693	0.000801321	0.000800099
2048-10-07	0.00081078	0.000811473	0.000809384
2048-11-07	0.000804416	0.000804323	0.000807709
2048-12-07	0.000813608	0.000813893	0.000819337
2049-01-07	0.000809705	0.000808357	0.000810049
2049-02-06	0.000808577	0.000805976	0.000811054
2049-03-07	0.000808315	0.00080886	0.000809226
2049-04-07	0.000805316	0.000803471	0.00080672
2049-05-07	0.000802378	0.000800169	0.000801681
2049-06-07	0.000803493	0.000799843	0.000803516
2049-07-07	0.000804537	0.000803328	0.000805887
2049-08-07	0.000804227	0.000800113	0.000803314
2049-09-07	0.000807584	0.000807689	0.000809404
2049-10-07	0.00080969	0.000811445	0.000814019
2049-11-07	0.000823739	0.000830489	0.000828516
2049-12-07	0.000820681	0.000827642	0.000826179
2050-01-07	0.000816883	0.000819361	0.000818362
2050-02-06	0.000818137	0.000819662	0.000819605
2050-03-07	0.000815357	0.00081262	0.000814128
2050-04-07	0.000813009	0.000813037	0.000813365
2050-05-07	0.000816965	0.000809914	0.000811918
2050-06-07	0.00081032	0.000808094	0.000810547
2050-07-07	0.000812321	0.000811465	0.000814535
2050-08-07	0.000808235	0.000810984	0.000813713
2050-09-07	0.000812266	0.00081022	0.000813586
2050-10-07	0.000813708	0.000815764	0.000817366
2050-11-07	0.000819289	0.000824012	0.000823729
2050-12-07	0.000821463	0.000822608	0.000822241
2051-01-07 12:00:00	0.000824116	0.000825609	0.000827912
2051-02-06	0.000821423	0.000821158	0.000823208
2051-03-07 12:00:00	0.000823282	0.000822662	0.00082376
2051-04-07	0.000817113	0.000813176	0.000816771
2051-05-07 12:00:00	0.000822145	0.000817094	0.000831751
2051-06-07	0.00081901	0.000817492	0.000824114
2051-07-07 12:00:00	0.00081225	0.000812858	0.000815012
2051-08-07 12:00:00	0.000813826	0.000816808	0.000820422
2051-09-07	0.000819963	0.000819378	0.000818719
2051-10-07 12:00:00	0.000821691	0.000829024	0.000832952
2051-11-07	0.000828057	0.000828851	0.00082766
2051-12-07 12:00:00	0.000827676	0.000833093	0.000834752
2052-01-07 12:00:00	0.000830975	0.0008304	0.000831168
2052-02-06	0.000827308	0.00083061	0.000833244
2052-03-06 12:00:00	0.000825991	0.000828872	0.000831593
2052-04-06	0.000821825	0.000823026	0.000826635
2052-05-06 12:00:00	0.000825393	0.000819422	0.000822526
2052-06-06	0.000824585	0.000827461	0.000830113
2052-07-06 12:00:00	0.00082247	0.000821293	0.000824449
2052-08-06 12:00:00	0.000822626	0.000819672	0.000822413
2052-09-06	0.000822912	0.000823684	0.000824279
2052-10-06 12:00:00	0.000826932	0.000828305	0.000831325
2052-11-06	0.00083563	0.0008412	0.00083999
2052-12-06 12:00:00	0.000840025	0.000853632	0.000849885
2053-01-06 12:00:00	0.000831623	0.00083763	0.000837015
2053-02-05	0.000839293	0.000841419	0.000841318
2053-03-06 12:00:00	0.000831766	0.000828846	0.000829338
2053-04-06	0.000833221	0.000832188	0.000833205
2053-05-06 12:00:00	0.000832575	0.000828335	0.000839416
2053-06-06	0.000833457	0.00082786	0.000833784
2053-07-06 12:00:00	0.000828478	0.000829624	0.000833482
2053-08-06 12:00:00	0.000828208	0.000827382	0.000830539
2053-09-06	0.000828735	0.000833805	0.00083016
2053-10-06 12:00:00	0.000832376	0.00083349	0.000833906
2053-11-06	0.000843631	0.000845348	0.000845063
2053-12-06 12:00:00	0.000839261	0.000838385	0.00083857
2054-01-06 12:00:00	0.000838619	0.000841271	0.000841051
2054-02-05	0.000836512	0.000836974	0.000837059
2054-03-06 12:00:00	0.000839406	0.000841711	0.000841881
2054-04-06	0.00083785	0.000833037	0.000834622
2054-05-06 12:00:00	0.00083793	0.000833602	0.000839657
2054-06-06	0.00084021	0.000836631	0.000840678
2054-07-06 12:00:00	0.000835601	0.000834795	0.000839561
2054-08-06 12:00:00	0.000835333	0.000831381	0.000836036
2054-09-06	0.000837951	0.000836267	0.000836414
2054-10-06 12:00:00	0.000840015	0.000840985	0.000841412
2054-11-06	0.000842971	0.000844603	0.000845695
2054-12-06 12:00:00	0.00084489	0.000849568	0.000847308
2055-01-06 12:00:00	0.000850382	0.000856777	0.000857226
2055-02-05	0.000850585	0.00085039	0.000850154
2055-03-06 12:00:00	0.000844533	0.000841855	0.000844373
2055-04-06	0.000847267	0.000842358	0.000848272
2055-05-06 12:00:00	0.000839329	0.000837702	0.000840448
2055-06-06	0.000843876	0.000841242	0.000848222
2055-07-06 12:00:00	0.000843812	0.000845383	0.000846073
2055-08-06 12:00:00	0.000843121	0.000839086	0.000840515
2055-09-06	0.000842369	0.000839575	0.000839143
2055-10-06 12:00:00	0.000848419	0.000852325	0.000854455
2055-11-06	0.000848203	0.000846552	0.000847048
2055-12-06 12:00:00	0.000856876	0.000864415	0.000864005
2056-01-06 12:00:00	0.000851376	0.00085425	0.000855561
2056-02-05	0.000851683	0.000855015	0.00085569
2056-03-05 12:00:00	0.000851819	0.000849723	0.00085442
2056-04-05	0.000851681	0.000849363	0.000851257
2056-05-05 12:00:00	0.000846761	0.000842649	0.000844313
2056-06-05	0.000845087	0.000844733	0.000847714
2056-07-05 12:00:00	0.000844634	0.000846828	0.00085165
2056-08-05 12:00:00	0.000847649	0.00084582	0.000849261
2056-09-05	0.000847816	0.000847119	0.000847869
2056-10-05 12:00:00	0.000849813	0.000856718	0.000857647
2056-11-05	0.000858888	0.000863797	0.000867519
2056-12-05 12:00:00	0.000855904	0.000857907	0.000862596
2057-01-05 12:00:00	0.000858425	0.000857987	0.000859041
2057-02-04	0.000856707	0.000856204	0.000857297
2057-03-05 12:00:00	0.000858892	0.000856101	0.000855282
2057-04-05	0.000850299	0.000849749	0.000851832
2057-05-05 12:00:00	0.000854111	0.000854325	0.000859033
2057-06-05	0.000850368	0.000851499	0.00085279
2057-07-05 12:00:00	0.000848082	0.000847856	0.000850263
2057-08-05 12:00:00	0.000850236	0.000849017	0.000854398
2057-09-05	0.000850415	0.000851058	0.00085521
2057-10-05 12:00:00	0.000855097	0.000857543	0.000860209
2057-11-05	0.000858624	0.00086533	0.000867637
2057-12-05 12:00:00	0.000864628	0.000870813	0.000871753
2058-01-05 12:00:00	0.0008655	0.000871085	0.000875972
2058-02-04	0.000865316	0.000867931	0.000869434
2058-03-05 12:00:00	0.000860009	0.000857124	0.00085854
2058-04-05	0.000856758	0.000856736	0.000858633
2058-05-05 12:00:00	0.00085663	0.00085615	0.000857349
2058-06-05	0.000856056	0.00085487	0.000862443
2058-07-05 12:00:00	0.00086187	0.000857543	0.000863858
2058-08-05 12:00:00	0.000859855	0.000855657	0.000860142
2058-09-05	0.000854449	0.000854242	0.000855241
2058-10-05 12:00:00	0.000862773	0.00086219	0.000862075
2058-11-05	0.00086306	0.000859551	0.000861116
2058-12-05 12:00:00	0.000869937	0.00087315	0.000874911
2059-01-05 12:00:00	0.000867804	0.000869321	0.000869533
2059-02-04	0.000866116	0.000864749	0.000866538
2059-03-05 12:00:00	0.000868196	0.000867707	0.000871045
2059-04-05	0.000861701	0.000858964	0.000861936
2059-05-05 12:00:00	0.000868513	0.000862528	0.000869496
2059-06-05	0.000864912	0.000858289	0.000862065
2059-07-05 12:00:00	0.000866823	0.000863168	0.000863966
2059-08-05 12:00:00	0.000859619	0.000859773	0.000862687
2059-09-05	0.000866236	0.000870397	0.000870895
2059-10-05 12:00:00	0.000871291	0.000871294	0.000870652
2059-11-05	0.000872033	0.000871426	0.000878844
2059-12-05 12:00:00	0.000884757	0.000886284	0.000890356
2060-01-05 12:00:00	0.000879616	0.000883017	0.000881458
2060-02-04	0.000872964	0.000868023	0.000870799
2060-03-04 12:00:00	0.000869733	0.000869018	0.000871474
2060-04-04	0.000874197	0.000876547	0.000879242
2060-05-04 12:00:00	0.00087429	0.000870508	0.000873973
2060-06-04	0.000876085	0.000871189	0.000876583
2060-07-04 12:00:00	0.000869286	0.000867117	0.000868902
2060-08-04 12:00:00	0.000868183	0.000867966	0.000874168
2060-09-04	0.0008701	0.000869905	0.000870198
2060-10-04 12:00:00	0.000874271	0.000878177	0.000879554
2060-11-04	0.000883253	0.000886602	0.000892062
2060-12-04 12:00:00	0.000879356	0.000883508	0.00088231
2061-01-04 12:00:00	0.000878824	0.000881755	0.000882143
2061-02-03	0.000878585	0.000879155	0.000878977
2061-03-04 12:00:00	0.000881978	0.000883493	0.00088679
2061-04-04	0.000878265	0.000877248	0.000879455
2061-05-04 12:00:00	0.000878468	0.000877582	0.000878595
2061-06-04	0.000873557	0.000873033	0.000875339
2061-07-04 12:00:00	0.000872504	0.000870963	0.00087374
2061-08-04 12:00:00	0.000878604	0.000872577	0.000876061
2061-09-04	0.000879668	0.000876237	0.000876353
2061-10-04 12:00:00	0.000877507	0.000881548	0.000892383
2061-11-04	0.000884359	0.000887772	0.000886385
2061-12-04 12:00:00	0.000888069	0.000894099	0.000893242
2062-01-04 12:00:00	0.000887431	0.000893184	0.000895089
2062-02-03	0.000889321	0.000890868	0.000894505
2062-03-04 12:00:00	0.000881072	0.000880393	0.000887247
2062-04-04	0.000884839	0.000884232	0.000886462
2062-05-04 12:00:00	0.000879948	0.0008807	0.000886459
2062-06-04	0.000877109	0.000878996	0.000886032
2062-07-04 12:00:00	0.000876052	0.000877697	0.000881689
2062-08-04 12:00:00	0.000885357	0.000880425	0.000882361
2062-09-04	0.000879018	0.000880903	0.000885814
2062-10-04 12:00:00	0.000882372	0.000883734	0.000884614
2062-11-04	0.000883832	0.000883319	0.000888297
2062-12-04 12:00:00	0.00089185	0.000893252	0.000893055
2063-01-04 12:00:00	0.000889998	0.000892483	0.000893611
2063-02-03	0.000888225	0.000891045	0.000891425
2063-03-04 12:00:00	0.000888628	0.000886962	0.000889396
2063-04-04	0.000884319	0.00088061	0.000881222
2063-05-04 12:00:00	0.000888732	0.000887021	0.000892695
2063-06-04	0.000887293	0.000882922	0.000888338
2063-07-04 12:00:00	0.000884562	0.000884334	0.00088739
2063-08-04 12:00:00	0.000888803	0.000887177	0.000890005
2063-09-04	0.00088862	0.000887723	0.000889472
2063-10-04 12:00:00	0.000889232	0.000891723	0.00089545
2063-11-04	0.000897892	0.00090215	0.000906019
2063-12-04 12:00:00	0.00089814	0.000899462	0.000903773
2064-01-04 12:00:00	0.000897207	0.000898745	0.000899754
2064-02-03	0.000897511	0.000900002	0.000900087
2064-03-03 12:00:00	0.000897544	0.000899101	0.000902575
2064-04-03	0.00088869	0.000886902	0.000890787
2064-05-03 12:00:00	0.000892385	0.000892853	0.000895434
2064-06-03	0.000893921	0.000890006	0.000892749
2064-07-03 12:00:00	0.000890246	0.00089015	0.000894629
2064-08-03 12:00:00	0.000892439	0.000889851	0.000895055
2064-09-03	0.000893808	0.000893202	0.000892955
2064-10-03 12:00:00	0.000898758	0.000902587	0.000905464
2064-11-03	0.000900767	0.000906819	0.000907073
2064-12-03 12:00:00	0.000905901	0.000912952	0.000913397
2065-01-03 12:00:00	0.000901377	0.000902092	0.00090267
2065-02-02	0.000900081	0.000900723	0.000904816
2065-03-03 12:00:00	0.000898599	0.000897522	0.000900379
2065-04-03	0.000897526	0.000895298	0.000897605
2065-05-03 12:00:00	0.000896389	0.000894221	0.000897252
2065-06-03	0.000895722	0.000895326	0.000902714
2065-07-03 12:00:00	0.000898203	0.00089762	0.000900874
2065-08-03 12:00:00	0.000896753	0.000895822	0.000901337
2065-09-03	0.000897047	0.000895433	0.000896205
2065-10-03 12:00:00	0.000901057	0.000902331	0.00090415
2065-11-03	0.000909915	0.000906275	0.000909021
2065-12-03 12:00:00	0.000907649	0.000910953	0.000908443
2066-01-03 12:00:00	0.000906294	0.000908527	0.000908366
2066-02-02	0.000908358	0.00090706	0.000910308
2066-03-03 12:00:00	0.000905664	0.000902895	0.000905652
2066-04-03	0.000906474	0.000901193	0.000902751
2066-05-03 12:00:00	0.000907158	0.000902148	0.000903813
2066-06-03	0.000907243	0.000901221	0.000908177
2066-07-03 12:00:00	0.000898773	0.000898305	0.000903207
2066-08-03 12:00:00	0.000905247	0.000904844	0.00091222
2066-09-03	0.0008988	0.000898857	0.000902673
2066-10-03 12:00:00	0.000905944	0.000909159	0.00091355
2066-11-03	0.000915884	0.000919668	0.000919572
2066-12-03 12:00:00	0.000915526	0.000920102	0.000918521
2067-01-03 12:00:00	0.000916011	0.000918196	0.000919427
2067-02-02	0.000915136	0.000911908	0.000914359
2067-03-03 12:00:00	0.000907278	0.000906444	0.000907602
2067-04-03	0.000914225	0.000911601	0.000914056
2067-05-03 12:00:00	0.00090997	0.000905056	0.000909053
2067-06-03	0.000911648	0.000911599	0.000917553
2067-07-03 12:00:00	0.000904852	0.000906602	0.000913152
2067-08-03 12:00:00	0.000907657	0.000905043	0.000907498
2067-09-03	0.000915469	0.000918139	0.00091911
2067-10-03 12:00:00	0.000911834	0.000920688	0.000922358
2067-11-03	0.000925085	0.000928604	0.00092352
2067-12-03 12:00:00	0.000919678	0.000921505	0.000921217
2068-01-03 12:00:00	0.000917165	0.00091796	0.000918924
2068-02-02	0.000917902	0.000915938	0.000915389
2068-03-02 12:00:00	0.000915087	0.000914193	0.000915675
2068-04-02	0.000920472	0.000914845	0.000914271
2068-05-02 12:00:00	0.000916355	0.000913074	0.000918812
2068-06-02	0.000917653	0.000917523	0.00092301
2068-07-02 12:00:00	0.000916766	0.000916647	0.000918992
2068-08-02 12:00:00	0.00091583	0.000918169	0.000920725
2068-09-02	0.000916809	0.000915675	0.000915926
2068-10-02 12:00:00	0.000918659	0.000925112	0.000925895
2068-11-02	0.000921459	0.000924932	0.000928256
2068-12-02 12:00:00	0.000921495	0.000922595	0.0009224
2069-01-02 12:00:00	0.000923667	0.000925755	0.000927548
2069-02-01	0.000921815	0.000922812	0.000923095
2069-03-02 12:00:00	0.000923053	0.000919771	0.000921729
2069-04-02	0.000918828	0.000916131	0.000917653
2069-05-02 12:00:00	0.000918257	0.000918124	0.000923362
2069-06-02	0.000917003	0.000915954	0.000918846
2069-07-02 12:00:00	0.00091405	0.000914316	0.000920027
2069-08-02 12:00:00	0.000917247	0.0009213	0.000925683
2069-09-02	0.00091758	0.000916837	0.000918519
2069-10-02 12:00:00	0.000920605	0.000918022	0.000918749
2069-11-02	0.000928335	0.000932925	0.000936414
2069-12-02 12:00:00	0.000932331	0.000935331	0.000939167
2070-01-02 12:00:00	0.000927408	0.000929936	0.000930296
2070-02-01	0.000926027	0.00092633	0.000928073
2070-03-02 12:00:00	0.000928588	0.000928124	0.000928664
2070-04-02	0.000927839	0.000925318	0.000926802
2070-05-02 12:00:00	0.000926237	0.000922468	0.000927518
2070-06-02	0.000926593	0.000923062	0.00092616
2070-07-02 12:00:00	0.000924331	0.000923588	0.000926776
2070-08-02 12:00:00	0.000926664	0.000925513	0.000927558
2070-09-02	0.000929544	0.000925776	0.000928149
2070-10-02 12:00:00	0.00093102	0.000932957	0.000934644
2070-11-02	0.00093458	0.000937913	0.000936886
2070-12-02 12:00:00	0.000934284	0.000935739	0.000936087
2071-01-02 12:00:00	0.000935045	0.000935381	0.000936135
2071-02-01	0.000937802	0.000938102	0.000937105
2071-03-02 12:00:00	0.000934503	0.000934443	0.000935542
2071-04-02	0.00093588	0.000933694	0.000935177
2071-05-02 12:00:00	0.000935382	0.000931943	0.000935832
2071-06-02	0.000930326	0.000929037	0.000932607
2071-07-02 12:00:00	0.00092875	0.000930037	0.000935084
2071-08-02 12:00:00	0.000930521	0.000932297	0.00093626
2071-09-02	0.000931623	0.000928237	0.000930068
2071-10-02 12:00:00	0.000933919	0.000934503	0.000934117
2071-11-02	0.00094106	0.000942695	0.000944547
2071-12-02 12:00:00	0.000945399	0.000947308	0.000949879
2072-01-02 12:00:00	0.00094285	0.000944429	0.000945131
2072-02-01	0.000941169	0.000943172	0.000945596
2072-03-01 12:00:00	0.000936309	0.00093553	0.000938633
2072-04-01	0.00093919	0.000938615	0.000938888
2072-05-01 12:00:00	0.000943633	0.000936518	0.000942069
2072-06-01	0.000939401	0.000936998	0.000944034
2072-07-01 12:00:00	0.000934957	0.000934297	0.000934192
2072-08-01 12:00:00	0.000938262	0.000935191	0.000939906
2072-09-01	0.000937294	0.000936506	0.000937732
2072-10-01 12:00:00	0.000938963	0.000939905	0.000941614
2072-11-01	0.000944888	0.000945131	0.000950789
2072-12-01 12:00:00	0.000952581	0.000956932	0.00095683
2073-01-01 12:00:00	0.000945606	0.000947492	0.000947369
2073-01-31	0.000943882	0.00094449	0.000945411
2073-03-01 12:00:00	0.000944766	0.000943266	0.000945136
2073-04-01	0.000942725	0.000942649	0.000943327
2073-05-01 12:00:00	0.000946526	0.000944001	0.000953742
2073-06-01	0.000945188	0.000946244	0.0009511
2073-07-01 12:00:00	0.000941692	0.000941109	0.00094571
2073-08-01 12:00:00	0.000947785	0.00094588	0.000952329
2073-09-01	0.000942283	0.000940624	0.000941752
2073-10-01 12:00:00	0.00094366	0.000948408	0.000950492
2073-11-01	0.000951359	0.000956125	0.000954093
2073-12-01 12:00:00	0.000953869	0.00095467	0.00095476
2074-01-01 12:00:00	0.00095021	0.00095061	0.00095185
2074-01-31	0.000951573	0.000953364	0.000953823
2074-03-01 12:00:00	0.00095137	0.000948733	0.000952921
2074-04-01	0.000950611	0.000947272	0.000949934
2074-05-01 12:00:00	0.000949768	0.000945951	0.000950889
2074-06-01	0.000950659	0.000946181	0.00095446
2074-07-01 12:00:00	0.000944105	0.000943424	0.000945263
2074-08-01 12:00:00	0.000942787	0.000945371	0.000949472
2074-09-01	0.000946817	0.000945517	0.000946323
2074-10-01 12:00:00	0.000951109	0.00095125	0.000952466
2074-11-01	0.000958157	0.000954323	0.000955982
2074-12-01 12:00:00	0.000958948	0.000963688	0.000964432
2075-01-01 12:00:00	0.000955808	0.000957732	0.000958815
2075-01-31	0.000957184	0.00095816	0.00095889
2075-03-01 12:00:00	0.000951967	0.000951789	0.000952737
2075-04-01	0.000951625	0.000951023	0.000952302
2075-05-01 12:00:00	0.000949714	0.000950697	0.000955339
2075-06-01	0.000951967	0.000952279	0.000955055
2075-07-01 12:00:00	0.000953357	0.000952386	0.000955662
2075-08-01 12:00:00	0.000950688	0.000953295	0.000955046
2075-09-01	0.000954459	0.000951291	0.000953298
2075-10-01 12:00:00	0.000955627	0.00095511	0.000963064
2075-11-01	0.000962925	0.000967504	0.000972049
2075-12-01 12:00:00	0.000961347	0.000965093	0.000965979
2076-01-01 12:00:00	0.000961054	0.000964595	0.000966508
2076-01-31	0.000959222	0.000959136	0.000960429
2076-02-29 12:00:00	0.000955989	0.000956929	0.000958343
2076-03-31	0.000955849	0.000953001	0.000955778
2076-04-30 12:00:00	0.000955801	0.00095379	0.000958101
2076-05-31	0.000954153	0.000952883	0.000955879
2076-06-30 12:00:00	0.000953059	0.00095155	0.00095263
2076-07-31 12:00:00	0.000953861	0.000951248	0.000953132
2076-08-31	0.00095764	0.000955203	0.000958132
2076-09-30 12:00:00	0.000957	0.000959179	0.000961154
2076-10-31	0.000964997	0.000965774	0.000968634
2076-11-30 12:00:00	0.000967915	0.00096896	0.000970394
2076-12-31 12:00:00	0.000960949	0.000961637	0.000963287
2077-01-30	0.0009635	0.000961377	0.000961844
2077-02-28 12:00:00	0.000963757	0.000963507	0.000966235
2077-03-31	0.000963647	0.000962683	0.000965262
2077-04-30 12:00:00	0.000956486	0.000956291	0.000959416
2077-05-31	0.000961331	0.000960598	0.000965819
2077-06-30 12:00:00	0.000962009	0.000959629	0.000961867
2077-07-31 12:00:00	0.000962397	0.000960654	0.000962614
2077-08-31	0.00095856	0.000957089	0.000958789
2077-09-30 12:00:00	0.000966899	0.000970841	0.000972651
2077-10-31	0.000967449	0.000969912	0.00096681
2077-11-30 12:00:00	0.00096913	0.00097171	0.000970495
2077-12-31 12:00:00	0.000968074	0.000969659	0.000969379
2078-01-30	0.000969541	0.000965573	0.000967282
2078-02-28 12:00:00	0.000967267	0.000963215	0.000963839
2078-03-31	0.000963606	0.000961457	0.000964827
2078-04-30 12:00:00	0.000963285	0.000962265	0.000966497
2078-05-31	0.000965724	0.000967227	0.000971452
2078-06-30 12:00:00	0.000964389	0.000965072	0.000967411
2078-07-31 12:00:00	0.000963391	0.00096296	0.000966804
2078-08-31	0.000962564	0.000963651	0.000963306
2078-09-30 12:00:00	0.000967331	0.000966532	0.000968871
2078-10-31	0.000973109	0.000976816	0.000982676
2078-11-30 12:00:00	0.000975163	0.00097797	0.000980241
2078-12-31 12:00:00	0.000974355	0.000978051	0.000979274
2079-01-30	0.000972741	0.000970279	0.000973793
2079-02-28 12:00:00	0.000971303	0.000969297	0.000972209
2079-03-31	0.000968665	0.000968347	0.000969598
2079-04-30 12:00:00	0.000975715	0.000974008	0.000978192
2079-05-31	0.000973237	0.000970842	0.000974796
2079-06-30 12:00:00	0.000966617	0.000965701	0.000970932
2079-07-31 12:00:00	0.00096837	0.000968909	0.000970802
2079-08-31	0.000967929	0.000966551	0.000967606
2079-09-30 12:00:00	0.000970861	0.000969489	0.000971556
2079-10-31	0.000976739	0.000980428	0.000985867
2079-11-30 12:00:00	0.000978029	0.000979909	0.000978292
2079-12-31 12:00:00	0.000978256	0.000977743	0.000979788
2080-01-30	0.000978168	0.000979701	0.000980161
2080-02-28 12:00:00	0.000977905	0.000976421	0.000978455
2080-03-30	0.000978753	0.000974511	0.000977102
2080-04-29 12:00:00	0.000974278	0.00097434	0.000980863
2080-05-30	0.000970603	0.000971919	0.000978528
2080-06-29 12:00:00	0.000973327	0.000977315	0.000977868
2080-07-30 12:00:00	0.000971198	0.000971684	0.000974798
2080-08-30	0.000972924	0.000971472	0.000974772
2080-09-29 12:00:00	0.000976094	0.00097644	0.000978363
2080-10-30	0.00097914	0.000980036	0.000979741
2080-11-29 12:00:00	0.000984286	0.00099121	0.000992685
2080-12-30 12:00:00	0.000980889	0.000981453	0.000984961
2081-01-29	0.00098033	0.000980427	0.00098177
2081-02-27 12:00:00	0.000979383	0.000978966	0.000979322
2081-03-30	0.000979616	0.000976098	0.000978996
2081-04-29 12:00:00	0.000978249	0.000974545	0.000978095
2081-05-30	0.000975927	0.000975133	0.000976967
2081-06-29 12:00:00	0.000978585	0.000981774	0.00098657
2081-07-30 12:00:00	0.000980516	0.000979933	0.00098217
2081-08-30	0.000976861	0.000974574	0.000978212
2081-09-29 12:00:00	0.000980051	0.000979923	0.000979674
2081-10-30	0.000983945	0.000983501	0.000987629
2081-11-29 12:00:00	0.000986811	0.000988967	0.000991298
2081-12-30 12:00:00	0.000988242	0.000990301	0.000992399
2082-01-29	0.000983719	0.000985335	0.000986613
2082-02-27 12:00:00	0.000985234	0.00098642	0.000988089
2082-03-30	0.000984365	0.000982282	0.000985199
2082-04-29 12:00:00	0.000983308	0.000980761	0.000984307
2082-05-30	0.000984031	0.00098509	0.000989636
2082-06-29 12:00:00	0.000978327	0.000976788	0.000978552
2082-07-30 12:00:00	0.000979664	0.000981051	0.000983928
2082-08-30	0.000978754	0.000977996	0.000978489
2082-09-29 12:00:00	0.000982481	0.000983589	0.000985052
2082-10-30	0.000985566	0.00098577	0.000987877
2082-11-29 12:00:00	0.000992695	0.000995781	0.000995625
2082-12-30 12:00:00	0.00098845	0.000990479	0.000991625
2083-01-29	0.00098842	0.000986073	0.000988997
2083-02-27 12:00:00	0.000988356	0.000983759	0.000986711
2083-03-30	0.000990124	0.000987042	0.0009914
2083-04-29 12:00:00	0.000987284	0.000984484	0.0009877
2083-05-30	0.000986278	0.000985938	0.000991521
2083-06-29 12:00:00	0.000989047	0.000988016	0.000992458
2083-07-30 12:00:00	0.000984063	0.000985178	0.000989697
2083-08-30	0.000988033	0.000983097	0.000984561
2083-09-29 12:00:00	0.000992848	0.000993109	0.000999829
2083-10-30	0.000993491	0.000995836	0.000998023
2083-11-29 12:00:00	0.000999726	0.000999962	0.000999864
2083-12-30 12:00:00	0.000995818	0.000997576	0.000999598
2084-01-29	0.000990499	0.000988501	0.000991455
2084-02-27 12:00:00	0.00099359	0.000995704	0.00100138
2084-03-29	0.000990584	0.000989182	0.000992747
2084-04-28 12:00:00	0.000990042	0.000989347	0.000994021
2084-05-29	0.000995587	0.000990942	0.000995772
2084-06-28 12:00:00	0.000993231	0.000991079	0.000995729
2084-07-29 12:00:00	0.000991882	0.000988849	0.000990907
2084-08-29	0.000988576	0.000990607	0.000990769
2084-09-28 12:00:00	0.0009939	0.000992904	0.000992051
2084-10-29	0.000999597	0.00100124	0.0010024
2084-11-28 12:00:00	0.000999645	0.00100229	0.00100758
2084-12-29 12:00:00	0.000994901	0.00099542	0.000998207
2085-01-28	0.000996046	0.000995586	0.00099768
2085-02-26 12:00:00	0.000996024	0.000995729	0.000996898
2085-03-29	0.00099667	0.000995032	0.000996478
2085-04-28 12:00:00	0.000993683	0.000992956	0.000996212
2085-05-29	0.000988847	0.000988764	0.000994384
2085-06-28 12:00:00	0.000994668	0.000996572	0.00100119
2085-07-29 12:00:00	0.0009995	0.000996941	0.00100058
2085-08-29	0.000993598	0.000993354	0.000996511
2085-09-28 12:00:00	0.0009976	0.000997396	0.000997783
2085-10-29	0.00100464	0.00100882	0.00100933
2085-11-28 12:00:00	0.00100461	0.00100689	0.00100739
2085-12-29 12:00:00	0.000998786	0.000999425	0.00100115
2086-01-28	0.00099953	0.000999772	0.00100276
2086-02-26 12:00:00	0.000997575	0.00099625	0.000997667
2086-03-29	0.000996701	0.000994081	0.000998193
2086-04-28 12:00:00	0.000996132	0.000995795	0.000998359
2086-05-29	0.000994954	0.000995027	0.00100053
2086-06-28 12:00:00	0.000996616	0.000994127	0.000998963
2086-07-29 12:00:00	0.000994327	0.000996173	0.000998299
2086-08-29	0.000996733	0.000998414	0.00100171
2086-09-28 12:00:00	0.000997365	0.000995132	0.000997518
2086-10-29	0.0010037	0.00100612	0.00100823
2086-11-28 12:00:00	0.00100742	0.00100912	0.00101001
2086-12-29 12:00:00	0.00100462	0.00100424	0.00100532
2087-01-28	0.00100832	0.00100555	0.00100895
2087-02-26 12:00:00	0.00100447	0.00100493	0.00100736
2087-03-29	0.00100332	0.0010018	0.00100474
2087-04-28 12:00:00	0.00100338	0.00100051	0.00100601
2087-05-29	0.00100156	0.00100031	0.00100607
2087-06-28 12:00:00	0.000997333	0.00099897	0.00100273
2087-07-29 12:00:00	0.000996888	0.000996823	0.00100257
2087-08-29	0.000999933	0.000996852	0.000998597
2087-09-28 12:00:00	0.00100213	0.0010001	0.000999808
2087-10-29	0.0010092	0.00100867	0.00101026
2087-11-28 12:00:00	0.00101019	0.0010115	0.00101148
2087-12-29 12:00:00	0.00100915	0.00101077	0.00101295
2088-01-28	0.00100681	0.00100672	0.00100768
2088-02-26 12:00:00	0.001006	0.00100461	0.00100738
2088-03-28	0.00100849	0.00100585	0.00100624
2088-04-27 12:00:00	0.00100368	0.00100281	0.00100701
2088-05-28	0.00100125	0.00100344	0.00100951
2088-06-27 12:00:00	0.00100345	0.00100254	0.00100877
2088-07-28 12:00:00	0.00100162	0.00100268	0.00100911
2088-08-28	0.00100236	0.00100251	0.00100664
2088-09-27 12:00:00	0.00100814	0.00100873	0.00100997
2088-10-28	0.00101268	0.00101289	0.00101296
2088-11-27 12:00:00	0.00101133	0.00101117	0.00101173
2088-12-28 12:00:00	0.00101172	0.00101245	0.0010132
2089-01-27	0.00101403	0.0010151	0.00101489
2089-02-25 12:00:00	0.00100897	0.00100819	0.00101051
2089-03-28	0.00100859	0.00100606	0.00100806
2089-04-27 12:00:00	0.001008	0.00100447	0.00100716
2089-05-28	0.00101005	0.00100816	0.00101152
2089-06-27 12:00:00	0.00100319	0.00100452	0.00101017
2089-07-28 12:00:00	0.00100473	0.00100605	0.00100966
2089-08-28	0.00100538	0.00100203	0.00100358
2089-09-27 12:00:00	0.00101005	0.00100942	0.00101127
2089-10-28	0.00101476	0.00101629	0.00101609
2089-11-27 12:00:00	0.00101747	0.00101796	0.00102283
2089-12-28 12:00:00	0.00101608	0.00101516	0.00101878
2090-01-27	0.00101275	0.00101167	0.0010125
2090-02-25 12:00:00	0.00101439	0.0010136	0.0010157
2090-03-28	0.00101102	0.00100964	0.00101144
2090-04-27 12:00:00	0.00101068	0.00100987	0.0010118
2090-05-28	0.00100942	0.00100956	0.00101375
2090-06-27 12:00:00	0.00101307	0.00101046	0.00101541
2090-07-28 12:00:00	0.00100725	0.00101113	0.00101523
2090-08-28	0.00101068	0.00100718	0.00100714
2090-09-27 12:00:00	0.00101352	0.00101522	0.00101846
2090-10-28	0.00101754	0.0010199	0.00102122
2090-11-27 12:00:00	0.00102107	0.00102028	0.00102236
2090-12-28 12:00:00	0.00102107	0.00102114	0.00102171
2091-01-27	0.00101811	0.00101639	0.00101916
2091-02-25 12:00:00	0.00101616	0.00101661	0.00101943
2091-03-28	0.00101728	0.00101449	0.00101954
2091-04-27 12:00:00	0.00101631	0.0010129	0.00101818
2091-05-28	0.00101341	0.0010137	0.0010203
2091-06-27 12:00:00	0.00101133	0.00101095	0.00101576
2091-07-28 12:00:00	0.00101486	0.00101475	0.00101812
2091-08-28	0.00101126	0.00100786	0.00100954
2091-09-27 12:00:00	0.00101759	0.0010183	0.00101883
2091-10-28	0.0010199	0.00102089	0.00102299
2091-11-27 12:00:00	0.00102395	0.00102718	0.00103346
2091-12-28 12:00:00	0.00102097	0.00102025	0.00102234
2092-01-27	0.00102165	0.00102231	0.00102493
2092-02-25 12:00:00	0.00101869	0.00101837	0.00102008
2092-03-27	0.00101758	0.00101696	0.00101828
2092-04-26 12:00:00	0.00101804	0.00101755	0.00102174
2092-05-27	0.00101864	0.00101507	0.00101977
2092-06-26 12:00:00	0.00100966	0.00101268	0.00102014
2092-07-27 12:00:00	0.00101525	0.00101762	0.00102243
2092-08-27	0.00101861	0.00101386	0.00101649
2092-09-26 12:00:00	0.00101812	0.00101706	0.00101742
2092-10-27	0.00102878	0.00102981	0.00103271
2092-11-26 12:00:00	0.00102566	0.0010253	0.00102852
2092-12-27 12:00:00	0.00102531	0.00102441	0.00102725
2093-01-26	0.00102379	0.00102415	0.00102531
2093-02-24 12:00:00	0.00102491	0.00102346	0.00102846
2093-03-27	0.00102319	0.00102229	0.00102501
2093-04-26 12:00:00	0.00102192	0.00101935	0.00102632
2093-05-27	0.00102298	0.001024	0.00102795
2093-06-26 12:00:00	0.00101883	0.00101579	0.00101894
2093-07-27 12:00:00	0.00102389	0.00102282	0.00102731
2093-08-27	0.00101825	0.00101567	0.00101737
2093-09-26 12:00:00	0.00102522	0.00102896	0.00102612
2093-10-27	0.0010275	0.00103158	0.00103571
2093-11-26 12:00:00	0.00103168	0.00103188	0.00103398
2093-12-27 12:00:00	0.00102891	0.00102949	0.00103192
2094-01-26	0.00102655	0.00102661	0.00102894
2094-02-24 12:00:00	0.00102494	0.00102409	0.0010252
2094-03-27	0.00102632	0.00102359	0.00102767
2094-04-26 12:00:00	0.00102475	0.00102414	0.00103244
2094-05-27	0.00102241	0.00102435	0.00103209
2094-06-26 12:00:00	0.00102393	0.00102377	0.00103268
2094-07-27 12:00:00	0.00102143	0.00102086	0.00102608
2094-08-27	0.00101984	0.00101934	0.00102103
2094-09-26 12:00:00	0.00102744	0.00102794	0.00103354
2094-10-27	0.00103204	0.00103327	0.00104369
2094-11-26 12:00:00	0.00103705	0.00104115	0.00104352
2094-12-27 12:00:00	0.00103155	0.00103314	0.00103468
2095-01-26	0.00102919	0.00102836	0.00103033
2095-02-24 12:00:00	0.00102921	0.00102737	0.00103018
2095-03-27	0.00102743	0.00102468	0.00103017
2095-04-26 12:00:00	0.00103012	0.00102485	0.0010275
2095-05-27	0.00102617	0.00102602	0.00102732
2095-06-26 12:00:00	0.00102615	0.00102766	0.00103177
2095-07-27 12:00:00	0.00102598	0.0010292	0.0010332
2095-08-27	0.00102137	0.0010207	0.00102156
2095-09-26 12:00:00	0.00102888	0.00102871	0.00102835
2095-10-27	0.0010325	0.00103203	0.00103378
2095-11-26 12:00:00	0.00103455	0.00103286	0.00103334
2095-12-27 12:00:00	0.00103365	0.0010323	0.00103468
2096-01-26	0.00103205	0.0010286	0.00103178
2096-02-24 12:00:00	0.00103256	0.00103339	0.00103482
2096-03-26	0.00102982	0.00102912	0.00103075
2096-04-25 12:00:00	0.00103206	0.00102855	0.00103298
2096-05-26	0.00103294	0.00103177	0.00103492
2096-06-25 12:00:00	0.00102994	0.00103127	0.00103375
2096-07-26 12:00:00	0.00103088	0.00103134	0.00103526
2096-08-26	0.00102861	0.00102909	0.00102886
2096-09-25 12:00:00	0.00103123	0.00102981	0.00102965
2096-10-26	0.00103682	0.00103383	0.00103457
2096-11-25 12:00:00	0.00103741	0.00103638	0.00103889
2096-12-26 12:00:00	0.00103518	0.00103626	0.00103745
2097-01-25	0.00103744	0.00103406	0.00103599
2097-02-23 12:00:00	0.00103459	0.00103436	0.00103612
2097-03-26	0.00103366	0.00103293	0.00103465
2097-04-25 12:00:00	0.00103314	0.00103181	0.00103789
2097-05-26	0.00103394	0.00103335	0.00103912
2097-06-25 12:00:00	0.00103274	0.00103592	0.00103964
2097-07-26 12:00:00	0.00103021	0.00103127	0.0010357
2097-08-26	0.00103898	0.0010333	0.00103599
2097-09-25 12:00:00	0.00103777	0.00103611	0.00103686
2097-10-26	0.00103835	0.00103953	0.00104083
2097-11-25 12:00:00	0.00104206	0.0010497	0.0010529
2097-12-26 12:00:00	0.00103864	0.00103976	0.00104434
2098-01-25	0.00103795	0.00103716	0.0010383
2098-02-23 12:00:00	0.00103591	0.00103486	0.00103811
2098-03-26	0.00103657	0.00103464	0.0010373
2098-04-25 12:00:00	0.001036	0.00103568	0.00104265
2098-05-26	0.00104084	0.00103968	0.00104328
2098-06-25 12:00:00	0.00103809	0.00103879	0.0010407
2098-07-26 12:00:00	0.00103291	0.00103611	0.00104137
2098-08-26	0.00103265	0.0010322	0.00103558
2098-09-25 12:00:00	0.00103614	0.00103678	0.00103893
2098-10-26	0.00104143	0.00104248	0.00104444
2098-11-25 12:00:00	0.00104238	0.00104263	0.00104407
2098-12-26 12:00:00	0.00104095	0.00104138	0.00104248
2099-01-25	0.00104218	0.00104219	0.00104194
2099-02-23 12:00:00	0.00103883	0.00103865	0.00104063
2099-03-26	0.00103718	0.00103628	0.0010382
2099-04-25 12:00:00	0.00103659	0.00103606	0.00104047
2099-05-26	0.00103846	0.00103741	0.00104057
2099-06-25 12:00:00	0.001037	0.00103882	0.00104252
2099-07-26 12:00:00	0.00103505	0.00103572	0.00103905
2099-08-26	0.0010349	0.00103324	0.00103338
2099-09-25 12:00:00	0.00104059	0.00103972	0.00103976
2099-10-26	0.00104306	0.00104102	0.00104484
2099-11-25 12:00:00	0.00104908	0.00105046	0.0010515

## Sheet: Table SF4
Time	East Coast	Pearl River Delta	West Coast
2015-01-16	0.0884374	0.0873997	0.0870812
2015-02-15	0.0883146	0.0888699	0.0889732
2015-03-16	0.0877737	0.0890019	0.088607
2015-04-16	0.0889422	0.0879835	0.0872127
2015-05-16	0.0881383	0.0862213	0.0845227
2015-06-16	0.0848282	0.0863864	0.0875443
2015-07-16	0.0735399	0.0869379	0.0858533
2015-08-16	0.0770743	0.0789571	0.0781762
2015-09-16	0.0791299	0.0835838	0.0818377
2015-10-16	0.0875894	0.0842473	0.0842488
2015-11-16	0.0833267	0.0885273	0.0876887
2015-12-16	0.0856175	0.0898562	0.0893654
2016-01-16	0.0874537	0.0907242	0.0910952
2016-02-15	0.0908515	0.0900394	0.0914229
2016-03-15	0.090244	0.0896065	0.0898017
2016-04-15	0.0872568	0.0873379	0.0880485
2016-05-15	0.0876047	0.0874234	0.0873876
2016-06-15	0.0879211	0.0875909	0.0887692
2016-07-15	0.087996	0.0861587	0.0851192
2016-08-15	0.0766168	0.0828383	0.0829507
2016-09-15	0.0879999	0.0862965	0.0851883
2016-10-15	0.0836145	0.0825568	0.0866717
2016-11-15	0.0852193	0.0893737	0.0887397
2016-12-15	0.0904026	0.0925991	0.092152
2017-01-15	0.0871871	0.0905027	0.0908951
2017-02-14	0.0899042	0.0912111	0.0901069
2017-03-15	0.0880222	0.0875892	0.0887789
2017-04-15	0.0889267	0.0878115	0.0873434
2017-05-15	0.0843354	0.0876667	0.0872386
2017-06-15	0.0842436	0.088257	0.0895666
2017-07-15	0.0818553	0.0809143	0.083913
2017-08-15	0.0830813	0.0857243	0.0824434
2017-09-15	0.085955	0.0849919	0.083711
2017-10-15	0.0917385	0.0913522	0.0911717
2017-11-15	0.087256	0.0866159	0.0886708
2017-12-15	0.0857031	0.0903421	0.0906774
2018-01-15	0.0912584	0.0928791	0.092277
2018-02-14	0.0918598	0.0915298	0.0913307
2018-03-15	0.0898037	0.0899684	0.0898049
2018-04-15	0.0912587	0.0906423	0.0906938
2018-05-15	0.0873496	0.0880265	0.0870539
2018-06-15	0.0821892	0.0841155	0.0857173
2018-07-15	0.0838571	0.0850251	0.0837335
2018-08-15	0.0773206	0.0827708	0.0849592
2018-09-15	0.082324	0.0879581	0.0868653
2018-10-15	0.090014	0.0887736	0.0900014
2018-11-15	0.0886277	0.0893124	0.0903154
2018-12-15	0.0849465	0.0876361	0.088587
2019-01-15	0.0888361	0.0808416	0.0871988
2019-02-14	0.0897804	0.0923751	0.0926919
2019-03-15	0.091814	0.0917081	0.0911589
2019-04-15	0.0907764	0.0898543	0.0863997
2019-05-15	0.0896359	0.0902215	0.0897716
2019-06-15	0.0852763	0.0864548	0.080863
2019-07-15	0.0856661	0.0860916	0.0835145
2019-08-15	0.0810821	0.089628	0.085854
2019-09-15	0.0860819	0.0864148	0.0832917
2019-10-15	0.0893476	0.0879794	0.0879049
2019-11-15	0.0858311	0.0891927	0.0892569
2019-12-15	0.0878901	0.0918642	0.0921169
2020-01-15	0.0934631	0.0943433	0.0951154
2020-02-14	0.0922045	0.0927413	0.0933696
2020-03-14	0.0927666	0.0927799	0.0930472
2020-04-14	0.0884781	0.088247	0.0879619
2020-05-14	0.0871559	0.0899754	0.0876756
2020-06-14	0.0900581	0.0904989	0.0899624
2020-07-14	0.0849131	0.0871621	0.0889672
2020-08-14	0.0879458	0.0871165	0.0884934
2020-09-14	0.0884718	0.0881433	0.0894486
2020-10-14	0.090082	0.0894815	0.0898353
2020-11-14	0.0895629	0.0936558	0.094354
2020-12-14	0.0894328	0.0942763	0.0949526
2021-01-14	0.0943524	0.0948348	0.0947478
2021-02-13	0.0956669	0.0956684	0.0952742
2021-03-14	0.0945454	0.0937936	0.0934235
2021-04-14	0.0916209	0.0906993	0.0905368
2021-05-14	0.0932526	0.0924319	0.0921324
2021-06-14	0.0914878	0.0910162	0.0903663
2021-07-14	0.084124	0.0870142	0.0865011
2021-08-14	0.0853399	0.0903685	0.0905183
2021-09-14	0.0907774	0.0881478	0.0912896
2021-10-14	0.0898998	0.0923381	0.0905033
2021-11-14	0.0797244	0.0827062	0.0912784
2021-12-14	0.0864256	0.0948154	0.0965882
2022-01-14	0.0906222	0.0881466	0.0920009
2022-02-13	0.0947428	0.0945533	0.094527
2022-03-14	0.091129	0.0928072	0.0940613
2022-04-14	0.0911485	0.0924131	0.0932941
2022-05-14	0.0922781	0.0921342	0.0920026
2022-06-14	0.0903355	0.0922511	0.0916676
2022-07-14	0.0864926	0.0854119	0.0868286
2022-08-14	0.0880402	0.0892306	0.0886076
2022-09-14	0.0901113	0.0857667	0.0883864
2022-10-14	0.0907543	0.0844728	0.0825122
2022-11-14	0.0929818	0.0946601	0.0946031
2022-12-14	0.0928613	0.0958121	0.0956324
2023-01-14	0.0954368	0.096998	0.0974572
2023-02-13	0.0936522	0.096407	0.0957915
2023-03-14	0.0935914	0.0941521	0.0940194
2023-04-14	0.0946111	0.0943636	0.092767
2023-05-14	0.0903934	0.0912251	0.0905096
2023-06-14	0.0887126	0.0922431	0.0929123
2023-07-14	0.0866925	0.0879796	0.088989
2023-08-14	0.0881241	0.0876827	0.0870081
2023-09-14	0.0872679	0.0858917	0.0887542
2023-10-14	0.088698	0.0913622	0.0925888
2023-11-14	0.0823337	0.086773	0.0926919
2023-12-14	0.0962466	0.0963666	0.0950123
2024-01-14	0.0957879	0.0978545	0.0962018
2024-02-13	0.0970021	0.0979049	0.0980377
2024-03-13	0.0960159	0.0973359	0.0979203
2024-04-13	0.0901006	0.0921047	0.092398
2024-05-13	0.0925336	0.0936832	0.0939109
2024-06-13	0.0907802	0.0891496	0.0884076
2024-07-13	0.0908335	0.0918418	0.0874618
2024-08-13	0.085828	0.0894485	0.0883886
2024-09-13	0.0909164	0.0915127	0.092508
2024-10-13	0.0851937	0.0936009	0.0936824
2024-11-13	0.0931397	0.0946497	0.0948907
2024-12-13	0.0946172	0.0970838	0.0974302
2025-01-13	0.0970561	0.0971371	0.0966791
2025-02-12	0.0974064	0.0980083	0.0986769
2025-03-13	0.0953429	0.0956546	0.0955144
2025-04-13	0.0935534	0.0943304	0.094009
2025-05-13	0.095104	0.0946786	0.0952417
2025-06-13	0.090857	0.0916081	0.085738
2025-07-13	0.0906566	0.0870846	0.0875835
2025-08-13	0.0916173	0.0919896	0.0902671
2025-09-13	0.0916711	0.091141	0.0924963
2025-10-13	0.0930992	0.0942533	0.0960117
2025-11-13	0.0919541	0.0941908	0.0960813
2025-12-13	0.0953532	0.0961443	0.096574
2026-01-13	0.0944008	0.0976073	0.0971165
2026-02-12	0.0956947	0.0972118	0.0974013
2026-03-13	0.0928832	0.0935016	0.0921201
2026-04-13	0.093041	0.093968	0.0942063
2026-05-13	0.0840523	0.0941599	0.0942316
2026-06-13	0.0920545	0.0895856	0.09081
2026-07-13	0.0935514	0.0937933	0.093663
2026-08-13	0.0771573	0.0886605	0.0917979
2026-09-13	0.0856586	0.0909441	0.0876904
2026-10-13	0.0939574	0.094959	0.0946346
2026-11-13	0.0963385	0.0991606	0.0984063
2026-12-13	0.0915938	0.093924	0.0969673
2027-01-13	0.0964816	0.0982087	0.100554
2027-02-12	0.0978179	0.0993749	0.0994063
2027-03-13	0.0991318	0.0984898	0.0976378
2027-04-13	0.0957684	0.0957902	0.0943308
2027-05-13	0.0968224	0.0970068	0.0962866
2027-06-13	0.093222	0.094915	0.0967198
2027-07-13	0.0874723	0.0900343	0.0916759
2027-08-13	0.0934883	0.0892619	0.0858066
2027-09-13	0.0946306	0.0904056	0.0889542
2027-10-13	0.0973114	0.0990956	0.0999511
2027-11-13	0.0952527	0.0982569	0.0974938
2027-12-13	0.0947648	0.0935102	0.0976405
2028-01-13	0.0984965	0.10018	0.100067
2028-02-12	0.0935459	0.0958306	0.0956458
2028-03-12	0.0985785	0.0980487	0.098101
2028-04-12	0.0957496	0.096644	0.0968498
2028-05-12	0.0959751	0.0965974	0.096737
2028-06-12	0.0965335	0.0952834	0.0956854
2028-07-12	0.0960207	0.0950342	0.0951019
2028-08-12	0.0946759	0.0948636	0.0953113
2028-09-12	0.0962291	0.0935419	0.0944404
2028-10-12	0.0978673	0.0981416	0.0953114
2028-11-12	0.0918511	0.0971838	0.0975401
2028-12-12	0.0997827	0.10312	0.101293
2029-01-12	0.0985509	0.0999247	0.098976
2029-02-11	0.0986692	0.100102	0.0998339
2029-03-12	0.0967128	0.0969457	0.0966146
2029-04-12	0.0969712	0.0985104	0.097438
2029-05-12	0.0979115	0.097247	0.0965747
2029-06-12	0.0968405	0.0976317	0.0967109
2029-07-12	0.0970129	0.0957623	0.0953319
2029-08-12	0.097149	0.0908759	0.0903873
2029-09-12	0.0932402	0.0893254	0.0866427
2029-10-12	0.0921202	0.0926402	0.0919966
2029-11-12	0.097183	0.0888288	0.0923525
2029-12-12	0.0959247	0.0987039	0.100149
2030-01-12	0.0973987	0.101414	0.0999427
2030-02-11	0.101548	0.101492	0.102239
2030-03-12	0.100789	0.101161	0.101603
2030-04-12	0.0998941	0.0992143	0.0994912
2030-05-12	0.0956618	0.093321	0.0927287
2030-06-12	0.0939661	0.0971138	0.0987678
2030-07-12	0.0932059	0.0932675	0.0894944
2030-08-12	0.0924857	0.0951234	0.0960692
2030-09-12	0.0974415	0.100201	0.0965004
2030-10-12	0.0848843	0.0889749	0.0978478
2030-11-12	0.092245	0.0965291	0.0976912
2030-12-12	0.0963643	0.101199	0.0999476
2031-01-12	0.095023	0.0941525	0.0979068
2031-02-11	0.103834	0.104816	0.104811
2031-03-12	0.102294	0.10237	0.102447
2031-04-12	0.0993568	0.100047	0.0997303
2031-05-12	0.100653	0.0980307	0.0998269
2031-06-12	0.0975482	0.0966345	0.095069
2031-07-12	0.094733	0.0962595	0.097849
2031-08-12	0.0950763	0.0969679	0.0927707
2031-09-12	0.0956084	0.0951755	0.0922671
2031-10-12	0.0987648	0.101475	0.10167
2031-11-12	0.102807	0.103114	0.101686
2031-12-12	0.0976138	0.0993981	0.0996921
2032-01-12	0.103414	0.10193	0.101676
2032-02-11	0.102375	0.101632	0.101985
2032-03-11	0.103322	0.10349	0.102963
2032-04-11	0.101306	0.100986	0.0996093
2032-05-11	0.0950254	0.0994804	0.0989011
2032-06-11	0.0987041	0.0996951	0.0980084
2032-07-11	0.096145	0.094142	0.0963594
2032-08-11	0.0971832	0.097003	0.0969864
2032-09-11	0.0967975	0.0940543	0.0965456
2032-10-11	0.0954653	0.0996262	0.0996153
2032-11-11	0.100586	0.101569	0.101917
2032-12-11	0.100144	0.103664	0.10526
2033-01-11	0.10502	0.105362	0.105962
2033-02-10	0.0920226	0.105025	0.105038
2033-03-11	0.103057	0.102646	0.103483
2033-04-11	0.0991131	0.100902	0.100988
2033-05-11	0.100731	0.101586	0.101479
2033-06-11	0.100318	0.10013	0.10132
2033-07-11	0.0960891	0.101862	0.101726
2033-08-11	0.0991874	0.0994328	0.0969667
2033-09-11	0.0978076	0.098847	0.100053
2033-10-11	0.101805	0.10267	0.100466
2033-11-11	0.0985093	0.102747	0.1013
2033-12-11	0.100891	0.105957	0.107052
2034-01-11	0.10202	0.106162	0.10594
2034-02-10	0.101978	0.102283	0.0962989
2034-03-11	0.102744	0.103279	0.103306
2034-04-11	0.103173	0.102662	0.101963
2034-05-11	0.101899	0.100671	0.100747
2034-06-11	0.0935169	0.0977867	0.100241
2034-07-11	0.0869262	0.0973121	0.100443
2034-08-11	0.0909114	0.097447	0.09929
2034-09-11	0.09976	0.0980756	0.0980384
2034-10-11	0.103697	0.104161	0.103408
2034-11-11	0.103264	0.103094	0.101499
2034-12-11	0.104146	0.106568	0.104865
2035-01-11	0.106537	0.108358	0.107843
2035-02-10	0.106516	0.105798	0.106631
2035-03-11	0.104364	0.105615	0.10515
2035-04-11	0.103477	0.104202	0.103785
2035-05-11	0.0909776	0.103114	0.102535
2035-06-11	0.0995972	0.100846	0.096567
2035-07-11	0.099543	0.0971955	0.0989959
2035-08-11	0.0968688	0.0997502	0.0999874
2035-09-11	0.103605	0.0958354	0.0945552
2035-10-11	0.100514	0.102126	0.103761
2035-11-11	0.0993792	0.104485	0.105898
2035-12-11	0.102375	0.104928	0.104544
2036-01-11	0.105399	0.103694	0.102049
2036-02-10	0.106999	0.108825	0.108244
2036-03-10	0.105621	0.105922	0.106277
2036-04-10	0.102323	0.103865	0.105073
2036-05-10	0.0972842	0.10209	0.100563
2036-06-10	0.0966753	0.0986449	0.0994455
2036-07-10	0.10469	0.102504	0.100534
2036-08-10	0.104325	0.100223	0.0995427
2036-09-10	0.0951291	0.101519	0.102325
2036-10-10	0.104765	0.0987717	0.0975367
2036-11-10	0.0998807	0.103859	0.107636
2036-12-10	0.102983	0.103248	0.104292
2037-01-10	0.108471	0.109393	0.109905
2037-02-09	0.108858	0.109929	0.109155
2037-03-10	0.103156	0.107332	0.107622
2037-04-10	0.104157	0.103739	0.103588
2037-05-10	0.1041	0.103604	0.103275
2037-06-10	0.105726	0.105697	0.10386
2037-07-10	0.102811	0.0974357	0.0951543
2037-08-10	0.101954	0.101016	0.0993495
2037-09-10	0.0960889	0.099527	0.0999675
2037-10-10	0.105872	0.105884	0.106231
2037-11-10	0.10577	0.105629	0.106749
2037-12-10	0.106345	0.107862	0.108499
2038-01-10	0.10702	0.108203	0.108528
2038-02-09	0.108096	0.109529	0.108083
2038-03-10	0.105765	0.106702	0.106821
2038-04-10	0.10576	0.101947	0.104575
2038-05-10	0.105768	0.105055	0.105569
2038-06-10	0.0978605	0.10403	0.104383
2038-07-10	0.0945643	0.102245	0.102438
2038-08-10	0.0984876	0.0917045	0.0953401
2038-09-10	0.101418	0.102893	0.106422
2038-10-10	0.0989414	0.102864	0.104082
2038-11-10	0.102687	0.106428	0.10718
2038-12-10	0.106115	0.110073	0.11065
2039-01-10	0.109987	0.111127	0.110708
2039-02-09	0.108554	0.109267	0.109124
2039-03-10	0.108597	0.108607	0.10776
2039-04-10	0.107186	0.108537	0.106862
2039-05-10	0.103671	0.105992	0.10521
2039-06-10	0.103131	0.104971	0.105421
2039-07-10	0.0953164	0.0984016	0.0999481
2039-08-10	0.100785	0.101622	0.104231
2039-09-10	0.0929206	0.0989197	0.103441
2039-10-10	0.0968803	0.101566	0.104856
2039-11-10	0.105814	0.105837	0.107053
2039-12-10	0.104141	0.109705	0.10932
2040-01-10	0.112026	0.112425	0.113108
2040-02-09	0.109704	0.109967	0.110342
2040-03-09	0.109597	0.108826	0.107102
2040-04-09	0.105356	0.10529	0.105596
2040-05-09	0.108541	0.107882	0.106303
2040-06-09	0.097655	0.104227	0.103284
2040-07-09	0.0923498	0.0991746	0.104477
2040-08-09	0.101854	0.105743	0.107469
2040-09-09	0.109766	0.105884	0.10784
2040-10-09	0.10631	0.105547	0.107949
2040-11-09	0.107843	0.105778	0.10605
2040-12-09	0.106552	0.109139	0.110265
2041-01-09	0.107103	0.106042	0.108786
2041-02-08	0.111769	0.112075	0.11136
2041-03-09	0.106935	0.109199	0.109568
2041-04-09	0.10917	0.109777	0.109759
2041-05-09	0.103698	0.10763	0.107108
2041-06-09	0.108676	0.104828	0.105925
2041-07-09	0.104185	0.103826	0.105623
2041-08-09	0.1046	0.105011	0.105734
2041-09-09	0.107876	0.106582	0.107022
2041-10-09	0.0947192	0.102818	0.103941
2041-11-09	0.107716	0.107256	0.109776
2041-12-09	0.109957	0.110751	0.112643
2042-01-09	0.110687	0.112006	0.111046
2042-02-08	0.11026	0.108347	0.109241
2042-03-09	0.110942	0.110221	0.108046
2042-04-09	0.109504	0.110026	0.110036
2042-05-09	0.104363	0.107642	0.108163
2042-06-09	0.109284	0.1088	0.106826
2042-07-09	0.10952	0.104372	0.103257
2042-08-09	0.106202	0.106108	0.105924
2042-09-09	0.103413	0.0973239	0.094064
2042-10-09	0.106396	0.110026	0.109427
2042-11-09	0.105654	0.112431	0.113644
2042-12-09	0.107471	0.107462	0.107347
2043-01-09	0.107803	0.112989	0.112447
2043-02-08	0.113901	0.114842	0.114123
2043-03-09	0.110149	0.111901	0.111942
2043-04-09	0.106734	0.110069	0.10776
2043-05-09	0.110019	0.10891	0.109944
2043-06-09	0.106168	0.106654	0.108946
2043-07-09	0.10617	0.0975393	0.103844
2043-08-09	0.108588	0.107258	0.105634
2043-09-09	0.101672	0.108916	0.106552
2043-10-09	0.102731	0.105927	0.110637
2043-11-09	0.106222	0.109431	0.109572
2043-12-09	0.109607	0.112957	0.110775
2044-01-09	0.11225	0.114569	0.113122
2044-02-08	0.111402	0.11369	0.11325
2044-03-08	0.108813	0.111258	0.109788
2044-04-08	0.11165	0.111087	0.110114
2044-05-08	0.111477	0.110241	0.109994
2044-06-08	0.107929	0.108773	0.109423
2044-07-08	0.103363	0.107487	0.104383
2044-08-08	0.106795	0.1033	0.102042
2044-09-08	0.104312	0.105637	0.108898
2044-10-08	0.112873	0.112094	0.111316
2044-11-08	0.111915	0.114064	0.113697
2044-12-08	0.110974	0.111214	0.111402
2045-01-08	0.110182	0.11095	0.111648
2045-02-07	0.111624	0.112888	0.113975
2045-03-08	0.113746	0.114146	0.114309
2045-04-08	0.113353	0.114162	0.113335
2045-05-08	0.108936	0.109984	0.112696
2045-06-08	0.107655	0.107557	0.108397
2045-07-08	0.096284	0.107036	0.106409
2045-08-08	0.108099	0.109225	0.110397
2045-09-08	0.109463	0.101539	0.107671
2045-10-08	0.113277	0.114842	0.115007
2045-11-08	0.109871	0.115149	0.116027
2045-12-08	0.117294	0.119518	0.119367
2046-01-08	0.115907	0.117298	0.116892
2046-02-07	0.114098	0.114958	0.115415
2046-03-08	0.1119	0.114822	0.115499
2046-04-08	0.11266	0.112419	0.112739
2046-05-08	0.112062	0.111714	0.110755
2046-06-08	0.112554	0.113499	0.113046
2046-07-08	0.109992	0.109296	0.111529
2046-08-08	0.109486	0.110341	0.109597
2046-09-08	0.112404	0.109786	0.110542
2046-10-08	0.109081	0.111446	0.114414
2046-11-08	0.10783	0.115497	0.116188
2046-12-08	0.107954	0.113705	0.113868
2047-01-08	0.115659	0.116251	0.116395
2047-02-07	0.116421	0.116405	0.117718
2047-03-08	0.114876	0.11417	0.115152
2047-04-08	0.113888	0.11426	0.114872
2047-05-08	0.10926	0.112335	0.111758
2047-06-08	0.11208	0.111536	0.113561
2047-07-08	0.10693	0.111287	0.108287
2047-08-08	0.108685	0.10787	0.105666
2047-09-08	0.11283	0.110465	0.105348
2047-10-08	0.108582	0.109266	0.109267
2047-11-08	0.108028	0.11199	0.113646
2047-12-08	0.11414	0.112685	0.118051
2048-01-08	0.118575	0.120077	0.120177
2048-02-07	0.117737	0.118124	0.11812
2048-03-07	0.113604	0.115237	0.114838
2048-04-07	0.116678	0.116327	0.11477
2048-05-07	0.114904	0.115631	0.1146
2048-06-07	0.112712	0.114021	0.113465
2048-07-07	0.109949	0.110458	0.109959
2048-08-07	0.103317	0.108456	0.111308
2048-09-07	0.114942	0.111946	0.113996
2048-10-07	0.118091	0.117272	0.114563
2048-11-07	0.113072	0.112062	0.114742
2048-12-07	0.115875	0.117159	0.118077
2049-01-07	0.117912	0.118034	0.118199
2049-02-06	0.117499	0.118839	0.119109
2049-03-07	0.116897	0.117657	0.116653
2049-04-07	0.113786	0.1144	0.115737
2049-05-07	0.116607	0.115556	0.112571
2049-06-07	0.110106	0.110688	0.113443
2049-07-07	0.105125	0.109443	0.111444
2049-08-07	0.110682	0.110929	0.108987
2049-09-07	0.110616	0.114322	0.115367
2049-10-07	0.110972	0.116192	0.117319
2049-11-07	0.116662	0.119371	0.118785
2049-12-07	0.117514	0.120771	0.120618
2050-01-07	0.11873	0.120137	0.119511
2050-02-06	0.120746	0.121227	0.120593
2050-03-07	0.117897	0.118323	0.117743
2050-04-07	0.117132	0.115521	0.116454
2050-05-07	0.117902	0.116787	0.117642
2050-06-07	0.112107	0.116585	0.115929
2050-07-07	0.114134	0.111076	0.11427
2050-08-07	0.109702	0.111013	0.113134
2050-09-07	0.111352	0.114643	0.115799
2050-10-07	0.114166	0.118199	0.117519
2050-11-07	0.112568	0.115968	0.117927
2050-12-07	0.115109	0.119761	0.119617
2051-01-07 12:00:00	0.121083	0.122084	0.122206
2051-02-06	0.119924	0.120194	0.120468
2051-03-07 12:00:00	0.118196	0.117179	0.119115
2051-04-07	0.116947	0.11765	0.117221
2051-05-07 12:00:00	0.119233	0.117411	0.117237
2051-06-07	0.11275	0.114775	0.112304
2051-07-07 12:00:00	0.111046	0.114666	0.113901
2051-08-07 12:00:00	0.104589	0.106444	0.106878
2051-09-07	0.113341	0.116017	0.114743
2051-10-07 12:00:00	0.120398	0.118247	0.120213
2051-11-07	0.115887	0.116442	0.114829
2051-12-07 12:00:00	0.119954	0.122502	0.123366
2052-01-07 12:00:00	0.118625	0.1214	0.121846
2052-02-06	0.121099	0.121714	0.121854
2052-03-06 12:00:00	0.121353	0.122016	0.121855
2052-04-06	0.118822	0.120292	0.119175
2052-05-06 12:00:00	0.114515	0.117111	0.1185
2052-06-06	0.113825	0.119932	0.118925
2052-07-06 12:00:00	0.115668	0.117969	0.116993
2052-08-06 12:00:00	0.11536	0.111469	0.111618
2052-09-06	0.115152	0.115568	0.115148
2052-10-06 12:00:00	0.120685	0.12043	0.120204
2052-11-06	0.116481	0.119025	0.119569
2052-12-06 12:00:00	0.121318	0.123713	0.12341
2053-01-06 12:00:00	0.119948	0.122796	0.121971
2053-02-05	0.119968	0.121878	0.121502
2053-03-06 12:00:00	0.119029	0.120814	0.120585
2053-04-06	0.116976	0.119735	0.119785
2053-05-06 12:00:00	0.117352	0.11798	0.12071
2053-06-06	0.112204	0.116433	0.118003
2053-07-06 12:00:00	0.116809	0.116057	0.120744
2053-08-06 12:00:00	0.114456	0.114339	0.114627
2053-09-06	0.118147	0.116861	0.118626
2053-10-06 12:00:00	0.117631	0.117021	0.112888
2053-11-06	0.113262	0.120308	0.121773
2053-12-06 12:00:00	0.114723	0.121291	0.121092
2054-01-06 12:00:00	0.121433	0.123034	0.122255
2054-02-05	0.122266	0.122036	0.122395
2054-03-06 12:00:00	0.118393	0.122165	0.121757
2054-04-06	0.120842	0.119496	0.118478
2054-05-06 12:00:00	0.115735	0.119018	0.117661
2054-06-06	0.117651	0.111971	0.115934
2054-07-06 12:00:00	0.110927	0.117657	0.118704
2054-08-06 12:00:00	0.109264	0.115339	0.116143
2054-09-06	0.119253	0.118077	0.118091
2054-10-06 12:00:00	0.116089	0.114686	0.115519
2054-11-06	0.120957	0.119786	0.118492
2054-12-06 12:00:00	0.117408	0.121589	0.121885
2055-01-06 12:00:00	0.120907	0.123713	0.12428
2055-02-05	0.12035	0.123332	0.124759
2055-03-06 12:00:00	0.124139	0.123153	0.123413
2055-04-06	0.120319	0.120378	0.120515
2055-05-06 12:00:00	0.118804	0.121434	0.120053
2055-06-06	0.11817	0.119291	0.119101
2055-07-06 12:00:00	0.115446	0.117506	0.116661
2055-08-06 12:00:00	0.117084	0.114535	0.113528
2055-09-06	0.114652	0.11246	0.113888
2055-10-06 12:00:00	0.12429	0.123754	0.123022
2055-11-06	0.11552	0.113607	0.118616
2055-12-06 12:00:00	0.122822	0.126213	0.126069
2056-01-06 12:00:00	0.124016	0.1255	0.125282
2056-02-05	0.123834	0.125453	0.124398
2056-03-05 12:00:00	0.121798	0.124662	0.124586
2056-04-05	0.123986	0.123846	0.123267
2056-05-05 12:00:00	0.122312	0.12125	0.120829
2056-06-05	0.118018	0.120526	0.122433
2056-07-05 12:00:00	0.121133	0.11962	0.115285
2056-08-05 12:00:00	0.120011	0.118157	0.118015
2056-09-05	0.123644	0.122321	0.123157
2056-10-05 12:00:00	0.122207	0.123868	0.122881
2056-11-05	0.120119	0.124653	0.123989
2056-12-05 12:00:00	0.121725	0.124076	0.125091
2057-01-05 12:00:00	0.126471	0.127134	0.127797
2057-02-04	0.124818	0.125286	0.126477
2057-03-05 12:00:00	0.124094	0.124329	0.122443
2057-04-05	0.112862	0.121508	0.122199
2057-05-05 12:00:00	0.112364	0.121948	0.120033
2057-06-05	0.122314	0.121354	0.1226
2057-07-05 12:00:00	0.115654	0.120791	0.120483
2057-08-05 12:00:00	0.11681	0.117526	0.116582
2057-09-05	0.11728	0.117988	0.119239
2057-10-05 12:00:00	0.123298	0.124135	0.124173
2057-11-05	0.123202	0.122246	0.122679
2057-12-05 12:00:00	0.124066	0.125495	0.127376
2058-01-05 12:00:00	0.125587	0.128671	0.128758
2058-02-04	0.125532	0.126457	0.126601
2058-03-05 12:00:00	0.12244	0.123747	0.123061
2058-04-05	0.119816	0.123841	0.123467
2058-05-05 12:00:00	0.118584	0.120275	0.120379
2058-06-05	0.118334	0.12276	0.118878
2058-07-05 12:00:00	0.112366	0.119244	0.117221
2058-08-05 12:00:00	0.124387	0.123619	0.119189
2058-09-05	0.119959	0.121573	0.121911
2058-10-05 12:00:00	0.121928	0.117978	0.121628
2058-11-05	0.122418	0.123362	0.123946
2058-12-05 12:00:00	0.127609	0.128269	0.128969
2059-01-05 12:00:00	0.123322	0.123864	0.125139
2059-02-04	0.12598	0.126391	0.125482
2059-03-05 12:00:00	0.127365	0.127172	0.127135
2059-04-05	0.12526	0.124361	0.125124
2059-05-05 12:00:00	0.125629	0.123732	0.125033
2059-06-05	0.119069	0.121917	0.12032
2059-07-05 12:00:00	0.11776	0.121291	0.121112
2059-08-05 12:00:00	0.11496	0.119705	0.121019
2059-09-05	0.119813	0.124938	0.125558
2059-10-05 12:00:00	0.124867	0.1263	0.12454
2059-11-05	0.12376	0.124611	0.126548
2059-12-05 12:00:00	0.128676	0.129322	0.129581
2060-01-05 12:00:00	0.126325	0.128753	0.129033
2060-02-04	0.128043	0.127187	0.126929
2060-03-04 12:00:00	0.125397	0.126764	0.126431
2060-04-04	0.125581	0.125919	0.125835
2060-05-04 12:00:00	0.127301	0.126615	0.125061
2060-06-04	0.124004	0.124206	0.124885
2060-07-04 12:00:00	0.124622	0.12434	0.124084
2060-08-04 12:00:00	0.122772	0.119441	0.119079
2060-09-04	0.125921	0.126012	0.125498
2060-10-04 12:00:00	0.124034	0.124892	0.125299
2060-11-04	0.118983	0.126454	0.128097
2060-12-04 12:00:00	0.123051	0.128183	0.128542
2061-01-04 12:00:00	0.127856	0.126227	0.129201
2061-02-03	0.128595	0.128686	0.128405
2061-03-04 12:00:00	0.1267	0.128501	0.128528
2061-04-04	0.125067	0.125763	0.124527
2061-05-04 12:00:00	0.124715	0.124226	0.126565
2061-06-04	0.123098	0.124073	0.123759
2061-07-04 12:00:00	0.116663	0.116035	0.11898
2061-08-04 12:00:00	0.118295	0.121848	0.123411
2061-09-04	0.124806	0.124935	0.124456
2061-10-04 12:00:00	0.116152	0.125882	0.127969
2061-11-04	0.124046	0.126807	0.127612
2061-12-04 12:00:00	0.128769	0.129807	0.129022
2062-01-04 12:00:00	0.131048	0.132547	0.132303
2062-02-03	0.128581	0.130667	0.130517
2062-03-04 12:00:00	0.126944	0.128907	0.128779
2062-04-04	0.125989	0.128114	0.127288
2062-05-04 12:00:00	0.124079	0.126821	0.126466
2062-06-04	0.125589	0.126529	0.125788
2062-07-04 12:00:00	0.126793	0.126862	0.1267
2062-08-04 12:00:00	0.119561	0.119255	0.119041
2062-09-04	0.121205	0.123874	0.122646
2062-10-04 12:00:00	0.12433	0.118528	0.122906
2062-11-04	0.126172	0.127044	0.125292
2062-12-04 12:00:00	0.128123	0.129102	0.129629
2063-01-04 12:00:00	0.129025	0.127527	0.130536
2063-02-03	0.131329	0.132075	0.131642
2063-03-04 12:00:00	0.130053	0.129842	0.130449
2063-04-04	0.127241	0.125746	0.126867
2063-05-04 12:00:00	0.126873	0.128165	0.1271
2063-06-04	0.127178	0.120952	0.124436
2063-07-04 12:00:00	0.122425	0.123719	0.117755
2063-08-04 12:00:00	0.125024	0.123436	0.116703
2063-09-04	0.124585	0.125274	0.12449
2063-10-04 12:00:00	0.128881	0.12353	0.125601
2063-11-04	0.123638	0.125545	0.123876
2063-12-04 12:00:00	0.128656	0.130393	0.130405
2064-01-04 12:00:00	0.129336	0.13069	0.132172
2064-02-03	0.131064	0.13287	0.132432
2064-03-03 12:00:00	0.129762	0.130936	0.130967
2064-04-03	0.1257	0.125649	0.125831
2064-05-03 12:00:00	0.125845	0.128901	0.128222
2064-06-03	0.125503	0.126668	0.127006
2064-07-03 12:00:00	0.124796	0.123577	0.12547
2064-08-03 12:00:00	0.122968	0.113171	0.118379
2064-09-03	0.127761	0.128074	0.126779
2064-10-03 12:00:00	0.127296	0.130973	0.131483
2064-11-03	0.124944	0.12875	0.128235
2064-12-03 12:00:00	0.133149	0.134189	0.134066
2065-01-03 12:00:00	0.131156	0.133052	0.131512
2065-02-02	0.132574	0.132948	0.133074
2065-03-03 12:00:00	0.129884	0.130211	0.13069
2065-04-03	0.130612	0.130494	0.13014
2065-05-03 12:00:00	0.128706	0.129767	0.130668
2065-06-03	0.128634	0.129913	0.130507
2065-07-03 12:00:00	0.129104	0.127272	0.127604
2065-08-03 12:00:00	0.129341	0.128836	0.127428
2065-09-03	0.126502	0.121787	0.122984
2065-10-03 12:00:00	0.123901	0.128121	0.130016
2065-11-03	0.129203	0.131687	0.131352
2065-12-03 12:00:00	0.12933	0.129591	0.132012
2066-01-03 12:00:00	0.132403	0.132076	0.132226
2066-02-02	0.133189	0.133625	0.132216
2066-03-03 12:00:00	0.13034	0.131621	0.131862
2066-04-03	0.130221	0.130291	0.129299
2066-05-03 12:00:00	0.126644	0.128408	0.129472
2066-06-03	0.126495	0.128707	0.129713
2066-07-03 12:00:00	0.126319	0.124607	0.128822
2066-08-03 12:00:00	0.122383	0.121609	0.128822
2066-09-03	0.127542	0.126957	0.129063
2066-10-03 12:00:00	0.127023	0.124085	0.129935
2066-11-03	0.131144	0.134624	0.134958
2066-12-03 12:00:00	0.125783	0.133058	0.133261
2067-01-03 12:00:00	0.134655	0.135517	0.13553
2067-02-02	0.134678	0.134674	0.134218
2067-03-03 12:00:00	0.133098	0.133271	0.133077
2067-04-03	0.130512	0.130197	0.128411
2067-05-03 12:00:00	0.128156	0.130078	0.130282
2067-06-03	0.127815	0.129439	0.131399
2067-07-03 12:00:00	0.115459	0.126006	0.124634
2067-08-03 12:00:00	0.127849	0.128269	0.129086
2067-09-03	0.131826	0.131623	0.132774
2067-10-03 12:00:00	0.121985	0.124632	0.128207
2067-11-03	0.131107	0.132288	0.132858
2067-12-03 12:00:00	0.124881	0.130357	0.131713
2068-01-03 12:00:00	0.124773	0.134093	0.134161
2068-02-02	0.13519	0.135267	0.135549
2068-03-02 12:00:00	0.134194	0.134156	0.134274
2068-04-02	0.131028	0.132602	0.129542
2068-05-02 12:00:00	0.125403	0.129727	0.127752
2068-06-02	0.13137	0.132402	0.133896
2068-07-02 12:00:00	0.132916	0.131151	0.12891
2068-08-02 12:00:00	0.120195	0.123712	0.127306
2068-09-02	0.120808	0.130428	0.125544
2068-10-02 12:00:00	0.131841	0.131485	0.131941
2068-11-02	0.13214	0.134902	0.134101
2068-12-02 12:00:00	0.12682	0.130397	0.132885
2069-01-02 12:00:00	0.12787	0.123465	0.127678
2069-02-01	0.133247	0.135071	0.134283
2069-03-02 12:00:00	0.134608	0.135088	0.133713
2069-04-02	0.133919	0.133814	0.133066
2069-05-02 12:00:00	0.132228	0.131931	0.133519
2069-06-02	0.121133	0.13037	0.129573
2069-07-02 12:00:00	0.113525	0.122741	0.124981
2069-08-02 12:00:00	0.125977	0.131671	0.130531
2069-09-02	0.128756	0.128292	0.125528
2069-10-02 12:00:00	0.12483	0.128505	0.127476
2069-11-02	0.133373	0.136207	0.136816
2069-12-02 12:00:00	0.133228	0.137128	0.1381
2070-01-02 12:00:00	0.137384	0.137812	0.138003
2070-02-01	0.135339	0.135507	0.135438
2070-03-02 12:00:00	0.135807	0.136037	0.135495
2070-04-02	0.133517	0.132258	0.130933
2070-05-02 12:00:00	0.126997	0.13299	0.132779
2070-06-02	0.111032	0.128105	0.127001
2070-07-02 12:00:00	0.130359	0.130391	0.122427
2070-08-02 12:00:00	0.120513	0.124256	0.123911
2070-09-02	0.129875	0.132408	0.132718
2070-10-02 12:00:00	0.13564	0.131151	0.134068
2070-11-02	0.136298	0.136099	0.134853
2070-12-02 12:00:00	0.134916	0.136578	0.137943
2071-01-02 12:00:00	0.133638	0.135619	0.136354
2071-02-01	0.13855	0.138183	0.137393
2071-03-02 12:00:00	0.137542	0.138098	0.137925
2071-04-02	0.135696	0.136175	0.135873
2071-05-02 12:00:00	0.133114	0.135197	0.133521
2071-06-02	0.130462	0.133765	0.133161
2071-07-02 12:00:00	0.122429	0.131687	0.127915
2071-08-02 12:00:00	0.13128	0.133476	0.133243
2071-09-02	0.134908	0.131819	0.131837
2071-10-02 12:00:00	0.134752	0.134998	0.132214
2071-11-02	0.132836	0.133963	0.133991
2071-12-02 12:00:00	0.132015	0.136989	0.138025
2072-01-02 12:00:00	0.137953	0.139403	0.139509
2072-02-01	0.138183	0.139262	0.139943
2072-03-01 12:00:00	0.136746	0.137089	0.136022
2072-04-01	0.13058	0.133485	0.134718
2072-05-01 12:00:00	0.12789	0.132382	0.133666
2072-06-01	0.136635	0.136321	0.135884
2072-07-01 12:00:00	0.133702	0.134817	0.133424
2072-08-01 12:00:00	0.133675	0.13306	0.13128
2072-09-01	0.130468	0.128202	0.126434
2072-10-01 12:00:00	0.137102	0.135344	0.136117
2072-11-01	0.137573	0.138366	0.139196
2072-12-01 12:00:00	0.139704	0.140248	0.139033
2073-01-01 12:00:00	0.137721	0.139157	0.139467
2073-01-31	0.139055	0.139624	0.139396
2073-03-01 12:00:00	0.132102	0.136812	0.138083
2073-04-01	0.136296	0.13679	0.136014
2073-05-01 12:00:00	0.135764	0.135625	0.134805
2073-06-01	0.1319	0.136286	0.13764
2073-07-01 12:00:00	0.128232	0.128461	0.118617
2073-08-01 12:00:00	0.136887	0.123232	0.130707
2073-09-01	0.13063	0.133631	0.131902
2073-10-01 12:00:00	0.133156	0.13049	0.136863
2073-11-01	0.135143	0.136952	0.135268
2073-12-01 12:00:00	0.138854	0.140749	0.140833
2074-01-01 12:00:00	0.136725	0.139464	0.141085
2074-01-31	0.141313	0.141662	0.141125
2074-03-01 12:00:00	0.138068	0.138207	0.139247
2074-04-01	0.139278	0.136339	0.137593
2074-05-01 12:00:00	0.133309	0.137393	0.137545
2074-06-01	0.121481	0.133557	0.129432
2074-07-01 12:00:00	0.134929	0.131897	0.133604
2074-08-01 12:00:00	0.126624	0.131429	0.127592
2074-09-01	0.136944	0.137498	0.134326
2074-10-01 12:00:00	0.137856	0.138573	0.137195
2074-11-01	0.132469	0.137107	0.138382
2074-12-01 12:00:00	0.139644	0.141791	0.142438
2075-01-01 12:00:00	0.140818	0.141856	0.142232
2075-01-31	0.141189	0.14171	0.141283
2075-03-01 12:00:00	0.140451	0.140874	0.140513
2075-04-01	0.138467	0.138631	0.137942
2075-05-01 12:00:00	0.135818	0.137146	0.136399
2075-06-01	0.13819	0.138756	0.138604
2075-07-01 12:00:00	0.128533	0.1349	0.137507
2075-08-01 12:00:00	0.132627	0.137556	0.134019
2075-09-01	0.133247	0.135774	0.135667
2075-10-01 12:00:00	0.13676	0.139385	0.139703
2075-11-01	0.136813	0.137799	0.138503
2075-12-01 12:00:00	0.139073	0.141928	0.143107
2076-01-01 12:00:00	0.139777	0.141071	0.141564
2076-01-31	0.140548	0.141324	0.141988
2076-02-29 12:00:00	0.136683	0.138867	0.138196
2076-03-31	0.139123	0.138066	0.138009
2076-04-30 12:00:00	0.134149	0.138113	0.136926
2076-05-31	0.135574	0.134644	0.135657
2076-06-30 12:00:00	0.136135	0.138406	0.135961
2076-07-31 12:00:00	0.132032	0.132179	0.130188
2076-08-31	0.134146	0.134193	0.132689
2076-09-30 12:00:00	0.136708	0.12885	0.135645
2076-10-31	0.141044	0.141922	0.14194
2076-11-30 12:00:00	0.139104	0.140351	0.141637
2076-12-31 12:00:00	0.140894	0.14171	0.142216
2077-01-30	0.141495	0.140599	0.142203
2077-02-28 12:00:00	0.138833	0.140998	0.140537
2077-03-31	0.140998	0.141376	0.141351
2077-04-30 12:00:00	0.13895	0.138877	0.137582
2077-05-31	0.139529	0.138867	0.140287
2077-06-30 12:00:00	0.138981	0.135921	0.135587
2077-07-31 12:00:00	0.137613	0.137655	0.137721
2077-08-31	0.138631	0.137625	0.139534
2077-09-30 12:00:00	0.139335	0.138559	0.136536
2077-10-31	0.13976	0.137428	0.138571
2077-11-30 12:00:00	0.140615	0.142434	0.141976
2077-12-31 12:00:00	0.138408	0.142603	0.142107
2078-01-30	0.141356	0.139575	0.141271
2078-02-28 12:00:00	0.140833	0.140981	0.140044
2078-03-31	0.141423	0.141072	0.140382
2078-04-30 12:00:00	0.137406	0.139949	0.13945
2078-05-31	0.127138	0.133204	0.130775
2078-06-30 12:00:00	0.136764	0.138252	0.134235
2078-07-31 12:00:00	0.126424	0.129452	0.126774
2078-08-31	0.134427	0.127315	0.118961
2078-09-30 12:00:00	0.129589	0.139298	0.139729
2078-10-31	0.13911	0.142379	0.142505
2078-11-30 12:00:00	0.141405	0.142495	0.14334
2078-12-31 12:00:00	0.143995	0.145135	0.145588
2079-01-30	0.143226	0.142701	0.143275
2079-02-28 12:00:00	0.14141	0.141132	0.141952
2079-03-31	0.139593	0.1412	0.139936
2079-04-30 12:00:00	0.130597	0.138889	0.137996
2079-05-31	0.14137	0.139925	0.139925
2079-06-30 12:00:00	0.135755	0.139572	0.138487
2079-07-31 12:00:00	0.130759	0.133578	0.134891
2079-08-31	0.139726	0.141062	0.140482
2079-09-30 12:00:00	0.140396	0.138416	0.141039
2079-10-31	0.137477	0.139417	0.142588
2079-11-30 12:00:00	0.139877	0.140757	0.139395
2079-12-31 12:00:00	0.143489	0.14398	0.144338
2080-01-30	0.140646	0.141031	0.144014
2080-02-28 12:00:00	0.141636	0.142503	0.142494
2080-03-30	0.140301	0.141313	0.140698
2080-04-29 12:00:00	0.138954	0.14147	0.140224
2080-05-30	0.137098	0.139295	0.13572
2080-06-29 12:00:00	0.138685	0.140254	0.139111
2080-07-30 12:00:00	0.134366	0.133526	0.134828
2080-08-30	0.103207	0.139173	0.137584
2080-09-29 12:00:00	0.142285	0.13917	0.140146
2080-10-30	0.138325	0.141985	0.143739
2080-11-29 12:00:00	0.142314	0.14452	0.146298
2080-12-30 12:00:00	0.140873	0.143491	0.144871
2081-01-29	0.144827	0.144392	0.144766
2081-02-27 12:00:00	0.142076	0.143471	0.142928
2081-03-30	0.143779	0.143331	0.143506
2081-04-29 12:00:00	0.142788	0.141944	0.141772
2081-05-30	0.139748	0.132541	0.135323
2081-06-29 12:00:00	0.138606	0.14159	0.139052
2081-07-30 12:00:00	0.134807	0.136372	0.139403
2081-08-30	0.138755	0.139575	0.135078
2081-09-29 12:00:00	0.140236	0.141023	0.141933
2081-10-30	0.127934	0.130263	0.139445
2081-11-29 12:00:00	0.139337	0.144682	0.145598
2081-12-30 12:00:00	0.143155	0.144599	0.145335
2082-01-29	0.142575	0.142535	0.143923
2082-02-27 12:00:00	0.143756	0.144222	0.14476
2082-03-30	0.14318	0.142663	0.141801
2082-04-29 12:00:00	0.141816	0.143632	0.141987
2082-05-30	0.126043	0.141032	0.141873
2082-06-29 12:00:00	0.13459	0.138091	0.137246
2082-07-30 12:00:00	0.140156	0.136563	0.138238
2082-08-30	0.136451	0.140137	0.142476
2082-09-29 12:00:00	0.141899	0.143908	0.139623
2082-10-30	0.140065	0.143604	0.142829
2082-11-29 12:00:00	0.144554	0.146335	0.145694
2082-12-30 12:00:00	0.141383	0.146102	0.146187
2083-01-29	0.143066	0.14512	0.145187
2083-02-27 12:00:00	0.145341	0.145205	0.144913
2083-03-30	0.144394	0.142357	0.14431
2083-04-29 12:00:00	0.142278	0.143371	0.14256
2083-05-30	0.136298	0.140777	0.142521
2083-06-29 12:00:00	0.122135	0.139743	0.143232
2083-07-30 12:00:00	0.137062	0.13638	0.139138
2083-08-30	0.136169	0.140928	0.140753
2083-09-29 12:00:00	0.144351	0.144766	0.144197
2083-10-30	0.13831	0.145006	0.141306
2083-11-29 12:00:00	0.141247	0.145747	0.147469
2083-12-30 12:00:00	0.14353	0.145758	0.14657
2084-01-29	0.144535	0.14517	0.144368
2084-02-27 12:00:00	0.144918	0.146757	0.147499
2084-03-29	0.142114	0.143185	0.143556
2084-04-28 12:00:00	0.14255	0.138731	0.140687
2084-05-29	0.139328	0.140783	0.140351
2084-06-28 12:00:00	0.134276	0.138923	0.134394
2084-07-29 12:00:00	0.144024	0.143028	0.141455
2084-08-29	0.141221	0.13963	0.143582
2084-09-28 12:00:00	0.132831	0.140697	0.1431
2084-10-29	0.144092	0.143654	0.146369
2084-11-28 12:00:00	0.142227	0.146963	0.148408
2084-12-29 12:00:00	0.144717	0.146344	0.147511
2085-01-28	0.145482	0.145394	0.146699
2085-02-26 12:00:00	0.145853	0.145795	0.145991
2085-03-29	0.138594	0.144283	0.143619
2085-04-28 12:00:00	0.144902	0.144944	0.143591
2085-05-29	0.129658	0.140883	0.140324
2085-06-28 12:00:00	0.141138	0.143676	0.142894
2085-07-29 12:00:00	0.141783	0.140142	0.135475
2085-08-29	0.142868	0.143257	0.142253
2085-09-28 12:00:00	0.144504	0.145129	0.143304
2085-10-29	0.145843	0.145208	0.147041
2085-11-28 12:00:00	0.139743	0.144636	0.145121
2085-12-29 12:00:00	0.146883	0.147742	0.145913
2086-01-28	0.147471	0.147858	0.14694
2086-02-26 12:00:00	0.143127	0.144857	0.144558
2086-03-29	0.143765	0.144887	0.143956
2086-04-28 12:00:00	0.138617	0.141569	0.142813
2086-05-29	0.137518	0.14185	0.140703
2086-06-28 12:00:00	0.135364	0.141164	0.142769
2086-07-29 12:00:00	0.142479	0.142979	0.143393
2086-08-29	0.143307	0.140903	0.14344
2086-09-28 12:00:00	0.143207	0.143715	0.143793
2086-10-29	0.147362	0.146669	0.147953
2086-11-28 12:00:00	0.144195	0.146322	0.146889
2086-12-29 12:00:00	0.14741	0.148395	0.147981
2087-01-28	0.146448	0.147972	0.147444
2087-02-26 12:00:00	0.148775	0.148486	0.148951
2087-03-29	0.144935	0.145552	0.144413
2087-04-28 12:00:00	0.141082	0.14449	0.14447
2087-05-29	0.147079	0.146396	0.146903
2087-06-28 12:00:00	0.144087	0.142877	0.140492
2087-07-29 12:00:00	0.133825	0.138516	0.139257
2087-08-29	0.146282	0.143949	0.144237
2087-09-28 12:00:00	0.146689	0.146914	0.144989
2087-10-29	0.145088	0.146688	0.146287
2087-11-28 12:00:00	0.143875	0.14926	0.149891
2087-12-29 12:00:00	0.141945	0.145188	0.146791
2088-01-28	0.147269	0.148294	0.148233
2088-02-26 12:00:00	0.145739	0.147752	0.146949
2088-03-28	0.140556	0.14574	0.145259
2088-04-27 12:00:00	0.146721	0.146611	0.146741
2088-05-28	0.143969	0.145821	0.144797
2088-06-27 12:00:00	0.134996	0.141334	0.142783
2088-07-28 12:00:00	0.143247	0.140926	0.143767
2088-08-28	0.146848	0.146161	0.147421
2088-09-27 12:00:00	0.14495	0.140745	0.143132
2088-10-28	0.145882	0.147136	0.147519
2088-11-27 12:00:00	0.149314	0.149564	0.149938
2088-12-28 12:00:00	0.148278	0.149418	0.149996
2089-01-27	0.150297	0.150555	0.150521
2089-02-25 12:00:00	0.14618	0.147463	0.146365
2089-03-28	0.148359	0.148254	0.147808
2089-04-27 12:00:00	0.146012	0.146573	0.146725
2089-05-28	0.146904	0.146121	0.143728
2089-06-27 12:00:00	0.128553	0.140325	0.134968
2089-07-28 12:00:00	0.14033	0.143724	0.138458
2089-08-28	0.142665	0.144455	0.143009
2089-09-27 12:00:00	0.147351	0.146829	0.145704
2089-10-28	0.144591	0.147124	0.146387
2089-11-27 12:00:00	0.145677	0.147865	0.149272
2089-12-28 12:00:00	0.148943	0.148618	0.149379
2090-01-27	0.148811	0.148657	0.147817
2090-02-25 12:00:00	0.145867	0.145594	0.147605
2090-03-28	0.145428	0.145289	0.145801
2090-04-27 12:00:00	0.147814	0.147311	0.147156
2090-05-28	0.138735	0.142993	0.145113
2090-06-27 12:00:00	0.142148	0.143354	0.14419
2090-07-28 12:00:00	0.13359	0.135979	0.139897
2090-08-28	0.143909	0.146504	0.146301
2090-09-27 12:00:00	0.147392	0.144136	0.145328
2090-10-28	0.147123	0.147258	0.146457
2090-11-27 12:00:00	0.14318	0.146615	0.150863
2090-12-28 12:00:00	0.150851	0.149517	0.151212
2091-01-27	0.148622	0.148537	0.150152
2091-02-25 12:00:00	0.149402	0.150179	0.149283
2091-03-28	0.149198	0.14953	0.150307
2091-04-27 12:00:00	0.146939	0.143529	0.145128
2091-05-28	0.14386	0.145639	0.148161
2091-06-27 12:00:00	0.142737	0.143865	0.145936
2091-07-28 12:00:00	0.142612	0.145735	0.145635
2091-08-28	0.142655	0.138815	0.133061
2091-09-27 12:00:00	0.141118	0.144729	0.148578
2091-10-28	0.147775	0.149308	0.14997
2091-11-27 12:00:00	0.14273	0.147227	0.149698
2091-12-28 12:00:00	0.15076	0.150216	0.150245
2092-01-27	0.148966	0.150098	0.149532
2092-02-25 12:00:00	0.150365	0.150184	0.150373
2092-03-27	0.148496	0.148994	0.148069
2092-04-26 12:00:00	0.144815	0.14721	0.146518
2092-05-27	0.145545	0.147026	0.147817
2092-06-26 12:00:00	0.142511	0.140924	0.142747
2092-07-27 12:00:00	0.143523	0.147074	0.146931
2092-08-27	0.135202	0.139074	0.136529
2092-09-26 12:00:00	0.14131	0.146612	0.145447
2092-10-27	0.146169	0.149059	0.1508
2092-11-26 12:00:00	0.14681	0.145665	0.150788
2092-12-27 12:00:00	0.147014	0.148078	0.149311
2093-01-26	0.137154	0.149569	0.150932
2093-02-24 12:00:00	0.14983	0.151072	0.151179
2093-03-27	0.149345	0.148794	0.148763
2093-04-26 12:00:00	0.148592	0.146919	0.149015
2093-05-27	0.143725	0.146803	0.144596
2093-06-26 12:00:00	0.138247	0.139173	0.136612
2093-07-27 12:00:00	0.143551	0.146399	0.14596
2093-08-27	0.143717	0.139613	0.139785
2093-09-26 12:00:00	0.149427	0.150289	0.149447
2093-10-27	0.148571	0.147545	0.146543
2093-11-26 12:00:00	0.147278	0.14927	0.149764
2093-12-27 12:00:00	0.150934	0.151606	0.153504
2094-01-26	0.149774	0.149955	0.150399
2094-02-24 12:00:00	0.14985	0.150431	0.149547
2094-03-27	0.149935	0.149719	0.149414
2094-04-26 12:00:00	0.146396	0.148369	0.147952
2094-05-27	0.1485	0.149362	0.149795
2094-06-26 12:00:00	0.137366	0.135051	0.14053
2094-07-27 12:00:00	0.144076	0.145582	0.139806
2094-08-27	0.146906	0.146438	0.140614
2094-09-26 12:00:00	0.148198	0.146657	0.143071
2094-10-27	0.146801	0.144977	0.149747
2094-11-26 12:00:00	0.145161	0.151494	0.152717
2094-12-27 12:00:00	0.151906	0.153639	0.153386
2095-01-26	0.150176	0.150194	0.151453
2095-02-24 12:00:00	0.149886	0.150044	0.149443
2095-03-27	0.150029	0.150436	0.149481
2095-04-26 12:00:00	0.14969	0.147634	0.148738
2095-05-27	0.146649	0.147752	0.148501
2095-06-26 12:00:00	0.144407	0.146708	0.148253
2095-07-27 12:00:00	0.142836	0.148528	0.149964
2095-08-27	0.143931	0.144014	0.141201
2095-09-26 12:00:00	0.143244	0.145497	0.144021
2095-10-27	0.144388	0.147075	0.147189
2095-11-26 12:00:00	0.150758	0.150205	0.151306
2095-12-27 12:00:00	0.148274	0.14652	0.152424
2096-01-26	0.152491	0.151598	0.152296
2096-02-24 12:00:00	0.15151	0.152817	0.152965
2096-03-26	0.150189	0.149474	0.148432
2096-04-25 12:00:00	0.149461	0.149689	0.150377
2096-05-26	0.148006	0.145521	0.146585
2096-06-25 12:00:00	0.137812	0.14534	0.145035
2096-07-26 12:00:00	0.140063	0.146285	0.144015
2096-08-26	0.15075	0.147799	0.147684
2096-09-25 12:00:00	0.148358	0.145882	0.144948
2096-10-26	0.151671	0.148681	0.150623
2096-11-25 12:00:00	0.150653	0.15107	0.152326
2096-12-26 12:00:00	0.153261	0.153689	0.154018
2097-01-25	0.15369	0.153581	0.152461
2097-02-23 12:00:00	0.152807	0.152765	0.153011
2097-03-26	0.151642	0.148832	0.149174
2097-04-25 12:00:00	0.145206	0.149179	0.149376
2097-05-26	0.147948	0.149019	0.148506
2097-06-25 12:00:00	0.142095	0.148093	0.149514
2097-07-26 12:00:00	0.143847	0.146243	0.1451
2097-08-26	0.150485	0.149934	0.148759
2097-09-25 12:00:00	0.15221	0.152051	0.150934
2097-10-26	0.148319	0.148646	0.146538
2097-11-25 12:00:00	0.148291	0.151916	0.15298
2097-12-26 12:00:00	0.151112	0.154188	0.154864
2098-01-25	0.151377	0.15308	0.151866
2098-02-23 12:00:00	0.151137	0.151902	0.152196
2098-03-26	0.14558	0.150383	0.150207
2098-04-25 12:00:00	0.141184	0.148118	0.148792
2098-05-26	0.150288	0.150061	0.144541
2098-06-25 12:00:00	0.148653	0.151739	0.152089
2098-07-26 12:00:00	0.145771	0.145228	0.143208
2098-08-26	0.145515	0.140367	0.139983
2098-09-25 12:00:00	0.14816	0.150568	0.150618
2098-10-26	0.148852	0.151743	0.15098
2098-11-25 12:00:00	0.152579	0.152867	0.151547
2098-12-26 12:00:00	0.149571	0.152279	0.151966
2099-01-25	0.1533	0.153308	0.1529
2099-02-23 12:00:00	0.149677	0.151903	0.149583
2099-03-26	0.148541	0.148975	0.140439
2099-04-25 12:00:00	0.144925	0.14766	0.150415
2099-05-26	0.147707	0.144965	0.145207
2099-06-25 12:00:00	0.146106	0.147935	0.146933
2099-07-26 12:00:00	0.128991	0.143527	0.145274
2099-08-26	0.144358	0.142089	0.145007
2099-09-25 12:00:00	0.15264	0.152554	0.153121
2099-10-26	0.147322	0.14712	0.148678
2099-11-25 12:00:00	0.149182	0.153255	0.151888

## Sheet: Table SF5
Time	East Coast	Pearl River Delta	West Coast
2015-01-16	0.0031118	0.00308474	0.00307797
2015-02-15	0.00310803	0.00312171	0.0031255
2015-03-16	0.00309126	0.0031188	0.0031108
2015-04-16	0.00312213	0.00309407	0.00307646
2015-05-16	0.00310748	0.00304823	0.0030058
2015-06-16	0.00300979	0.00305094	0.0030867
2015-07-16	0.00271038	0.00306581	0.00303842
2015-08-16	0.00280358	0.00285114	0.00283345
2015-09-16	0.00286166	0.00297712	0.00293064
2015-10-16	0.00308959	0.00300309	0.00300921
2015-11-16	0.00298124	0.00312924	0.00310851
2015-12-16	0.00304274	0.00316098	0.00314914
2016-01-16	0.00309389	0.00318293	0.00319154
2016-02-15	0.00318074	0.00315932	0.00319866
2016-03-15	0.00316059	0.00314076	0.00314783
2016-04-15	0.00308338	0.00308864	0.00310825
2016-05-15	0.00308975	0.0030814	0.0030828
2016-06-15	0.00309176	0.00308322	0.00311837
2016-07-15	0.0030977	0.00304235	0.00301849
2016-08-15	0.00279775	0.00295817	0.00296468
2016-09-15	0.00310026	0.00305535	0.00302329
2016-10-15	0.00299127	0.00296287	0.00307122
2016-11-15	0.00303886	0.00314883	0.00313678
2016-12-15	0.0031766	0.00324171	0.00322949
2017-01-15	0.00308964	0.00318081	0.00319289
2017-02-14	0.00316714	0.0032028	0.00317281
2017-03-15	0.0031079	0.0030951	0.00312998
2017-04-15	0.00313262	0.00310231	0.003091
2017-05-15	0.00301016	0.00309441	0.00308793
2017-06-15	0.00300385	0.00310854	0.00315226
2017-07-15	0.00294377	0.00291562	0.00299682
2017-08-15	0.00296728	0.00303415	0.00294996
2017-09-15	0.00304948	0.00302076	0.00299091
2017-10-15	0.00321249	0.00320633	0.00320355
2017-11-15	0.00309549	0.00308176	0.00313365
2017-12-15	0.00305458	0.00317934	0.00318795
2018-01-15	0.00320069	0.00325006	0.00323331
2018-02-14	0.00322005	0.00321162	0.00321015
2018-03-15	0.00315941	0.00316087	0.00316183
2018-04-15	0.00319942	0.00317356	0.00318143
2018-05-15	0.0030922	0.00310691	0.00308329
2018-06-15	0.00296068	0.0030056	0.00304753
2018-07-15	0.00299824	0.00303033	0.00299661
2018-08-15	0.00282171	0.00296654	0.00302975
2018-09-15	0.00295801	0.00310923	0.00308111
2018-10-15	0.0031664	0.00313199	0.0031643
2018-11-15	0.00314184	0.00316617	0.00319275
2018-12-15	0.00305301	0.00312824	0.00314863
2019-01-15	0.00315556	0.00294092	0.00310695
2019-02-14	0.00316823	0.00323811	0.0032484
2019-03-15	0.00322335	0.0032165	0.00320261
2019-04-15	0.00318825	0.00316027	0.00307363
2019-05-15	0.0031669	0.00317959	0.00317435
2019-06-15	0.00304416	0.00307355	0.00292554
2019-07-15	0.00305333	0.00305845	0.00299321
2019-08-15	0.00293703	0.00316289	0.00306903
2019-09-15	0.00306321	0.00307093	0.00299136
2019-10-15	0.00315535	0.00312396	0.00312541
2019-11-15	0.00307393	0.00316413	0.00316552
2019-12-15	0.00312958	0.00324066	0.00325109
2020-01-15	0.00327225	0.00330059	0.00332213
2020-02-14	0.00323764	0.00325233	0.00327093
2020-03-14	0.00325957	0.00325929	0.00327043
2020-04-14	0.00313318	0.00312224	0.00311676
2020-05-14	0.00310052	0.00317064	0.00311433
2020-06-14	0.0031739	0.00318292	0.00317313
2020-07-14	0.00303983	0.00309956	0.003152
2020-08-14	0.00311957	0.00309628	0.00313549
2020-09-14	0.00313607	0.003127	0.00316152
2020-10-14	0.00318051	0.00316953	0.00317756
2020-11-14	0.00317264	0.00329273	0.00331103
2020-12-14	0.00317434	0.00330848	0.0033256
2021-01-14	0.00330435	0.00331967	0.00331915
2021-02-13	0.00333934	0.00333725	0.00332789
2021-03-14	0.0033064	0.00328375	0.00327416
2021-04-14	0.0032232	0.00319511	0.00319467
2021-05-14	0.00327472	0.00324746	0.00324336
2021-06-14	0.00321408	0.00320016	0.00318549
2021-07-14	0.0030214	0.0030925	0.00308569
2021-08-14	0.00305995	0.00319015	0.00319808
2021-09-14	0.00320178	0.00313553	0.0032187
2021-10-14	0.00318397	0.00325037	0.00320015
2021-11-14	0.00291591	0.00299827	0.00322867
2021-12-14	0.00310225	0.0033307	0.00338663
2022-01-14	0.00321249	0.00314457	0.00324755
2022-02-13	0.00331677	0.00331052	0.00331091
2022-03-14	0.00322061	0.00326388	0.00330474
2022-04-14	0.00321735	0.00325001	0.00327645
2022-05-14	0.0032475	0.00324014	0.003239
2022-06-14	0.00319319	0.00324041	0.00322609
2022-07-14	0.00309705	0.00306215	0.00310393
2022-08-14	0.00313354	0.0031661	0.00315649
2022-09-14	0.00319266	0.0030778	0.00314484
2022-10-14	0.00321289	0.00305225	0.00300648
2022-11-14	0.00328449	0.00333864	0.00333804
2022-12-14	0.00328592	0.00337025	0.00336585
2023-01-14	0.0033453	0.00338675	0.00340085
2023-02-13	0.00330363	0.00338099	0.00336333
2023-03-14	0.00329619	0.00331153	0.00331157
2023-04-14	0.00332622	0.0033122	0.00327073
2023-05-14	0.00320729	0.00322318	0.00320711
2023-06-14	0.00316166	0.00325179	0.00327217
2023-07-14	0.00311115	0.00313557	0.00316561
2023-08-14	0.00314166	0.00312891	0.00311298
2023-09-14	0.0031184	0.00308106	0.00315722
2023-10-14	0.00316551	0.00323638	0.00327031
2023-11-14	0.00300696	0.00312951	0.003287
2023-12-14	0.00337455	0.0033823	0.00334594
2024-01-14	0.00336545	0.00342551	0.0033787
2024-02-13	0.00339501	0.00342357	0.00342794
2024-03-13	0.00336951	0.00340391	0.00342429
2024-04-13	0.0032029	0.00325296	0.0032624
2024-05-13	0.00327015	0.00329467	0.00330458
2024-06-13	0.00321924	0.00317599	0.0031595
2024-07-13	0.00321509	0.00323848	0.00312714
2024-08-13	0.00309191	0.00318394	0.00315842
2024-09-13	0.00323001	0.00323856	0.00326459
2024-10-13	0.0030811	0.00330772	0.00331221
2024-11-13	0.0032925	0.00333611	0.00334484
2024-12-13	0.00333626	0.00340525	0.0034174
2025-01-13	0.00340009	0.0034039	0.00339173
2025-02-12	0.00341103	0.00342888	0.00344802
2025-03-13	0.00335107	0.00335814	0.0033555
2025-04-13	0.00330578	0.00332539	0.00331663
2025-05-13	0.00334438	0.00332757	0.00334601
2025-06-13	0.00322834	0.00324364	0.00309043
2025-07-13	0.00322239	0.00312503	0.00313993
2025-08-13	0.00324692	0.00325441	0.00321183
2025-09-13	0.0032517	0.00323862	0.00327466
2025-10-13	0.00329325	0.00332669	0.00337271
2025-11-13	0.00327323	0.00334085	0.00338607
2025-12-13	0.00336716	0.00339697	0.00340871
2026-01-13	0.00334662	0.00343828	0.00342041
2026-02-12	0.00337297	0.00341065	0.00341639
2026-03-13	0.00328957	0.00330532	0.00327299
2026-04-13	0.00329507	0.00331427	0.00332654
2026-05-13	0.00305751	0.00332003	0.00332553
2026-06-13	0.0032663	0.00319416	0.00323253
2026-07-13	0.00330277	0.00330807	0.00330568
2026-08-13	0.00287134	0.00317184	0.00325649
2026-09-13	0.00310065	0.00323962	0.00315382
2026-10-13	0.00332001	0.00334037	0.00333493
2026-11-13	0.00339883	0.00347465	0.0034573
2026-12-13	0.00327663	0.00334092	0.00341967
2027-01-13	0.00340335	0.00345373	0.0035186
2027-02-12	0.00343792	0.00347798	0.00347959
2027-03-13	0.00347038	0.00344884	0.00342848
2027-04-13	0.00337349	0.00336594	0.0033308
2027-05-13	0.00340434	0.00340532	0.00338979
2027-06-13	0.00330806	0.00334425	0.00339759
2027-07-13	0.00315242	0.00321596	0.00326038
2027-08-13	0.00331675	0.00320404	0.00311573
2027-09-13	0.0033484	0.0032401	0.00320399
2027-10-13	0.00342066	0.00347192	0.00349727
2027-11-13	0.0033712	0.00345733	0.00344174
2027-12-13	0.00336237	0.00333508	0.00344133
2028-01-13	0.00345847	0.00350473	0.00350287
2028-02-12	0.00332675	0.00338826	0.00338452
2028-03-12	0.00346055	0.00344804	0.00344882
2028-04-12	0.00338451	0.00340832	0.00341226
2028-05-12	0.00338582	0.00339558	0.00340199
2028-06-12	0.00339969	0.00336385	0.00337493
2028-07-12	0.00338819	0.00335625	0.0033609
2028-08-12	0.00334961	0.00335387	0.00337528
2028-09-12	0.00339166	0.00331527	0.00334487
2028-10-12	0.00344058	0.00345337	0.00337727
2028-11-12	0.00328703	0.00343203	0.00344724
2028-12-12	0.00350988	0.00360957	0.0035524
2029-01-12	0.00346506	0.00350694	0.00348051
2029-02-11	0.00346604	0.00350453	0.00349742
2029-03-12	0.00341579	0.00341775	0.00340926
2029-04-12	0.0034203	0.00345745	0.00343041
2029-05-12	0.00344111	0.00342384	0.00340976
2029-06-12	0.0034107	0.00342815	0.00340503
2029-07-12	0.00341436	0.00338289	0.00337044
2029-08-12	0.003437	0.00326673	0.00325219
2029-09-12	0.00331946	0.00321666	0.00314686
2029-10-12	0.00329625	0.00330786	0.00329512
2029-11-12	0.00344616	0.00323394	0.00332462
2029-12-12	0.00340644	0.00348458	0.00351968
2030-01-12	0.00345064	0.00356078	0.0035196
2030-02-11	0.0035567	0.00355974	0.00357919
2030-03-12	0.00353753	0.00354625	0.00356
2030-04-12	0.00350864	0.00349065	0.00349934
2030-05-12	0.00339831	0.00332889	0.00331593
2030-06-12	0.0033486	0.00342748	0.00348018
2030-07-12	0.0033278	0.00332317	0.00322702
2030-08-12	0.0033091	0.00337326	0.00340214
2030-09-12	0.00343978	0.00350943	0.003414
2030-10-12	0.00310892	0.00322513	0.0034598
2030-11-12	0.00331393	0.00341948	0.00345727
2030-12-12	0.00342698	0.00356146	0.003527
2031-01-12	0.00338787	0.00336981	0.00346936
2031-02-11	0.00363068	0.0036609	0.00366201
2031-03-12	0.0035813	0.00358121	0.00358505
2031-04-12	0.00350497	0.00351876	0.0035153
2031-05-12	0.00353156	0.00345952	0.00351332
2031-06-12	0.00345419	0.0034232	0.00338464
2031-07-12	0.0033811	0.00341125	0.00345585
2031-08-12	0.00338127	0.00343174	0.00332105
2031-09-12	0.00340428	0.00338707	0.00331375
2031-10-12	0.00348431	0.0035666	0.00357198
2031-11-12	0.00360658	0.00362178	0.00357657
2031-12-12	0.00346574	0.0035169	0.00352216
2032-01-12	0.00361901	0.00358186	0.00357535
2032-02-11	0.00359238	0.00357094	0.00358192
2032-03-11	0.00361855	0.00362122	0.00360766
2032-04-11	0.00355661	0.00354479	0.00350997
2032-05-11	0.00338798	0.0035065	0.0034939
2032-06-11	0.00348512	0.00351347	0.00348112
2032-07-11	0.00341962	0.00336403	0.00342684
2032-08-11	0.00344477	0.00344145	0.00344329
2032-09-11	0.0034373	0.00335893	0.00342935
2032-10-11	0.00340877	0.0035272	0.00352986
2032-11-11	0.00355184	0.00358202	0.00359303
2032-12-11	0.00354263	0.00364273	0.00368176
2033-01-11	0.00367379	0.00368507	0.00370416
2033-02-10	0.00332964	0.0036785	0.00367769
2033-03-11	0.00361654	0.00360216	0.00362546
2033-04-11	0.00350732	0.00354936	0.00355533
2033-05-11	0.00354486	0.00356525	0.00356768
2033-06-11	0.00353904	0.00353302	0.00356991
2033-07-11	0.0034241	0.00358048	0.0035769
2033-08-11	0.00350791	0.00350838	0.00344702
2033-09-11	0.00346813	0.00349458	0.00352977
2033-10-11	0.0035824	0.00360997	0.00355028
2033-11-11	0.00350186	0.00362159	0.00358215
2033-12-11	0.00356836	0.0037117	0.00375188
2034-01-11	0.00360014	0.00371709	0.00371337
2034-02-10	0.00359663	0.00359775	0.00344234
2034-03-11	0.0036157	0.00362788	0.0036291
2034-04-11	0.0036236	0.00360464	0.00358812
2034-05-11	0.00358626	0.00355228	0.00355683
2034-06-11	0.00337154	0.00347874	0.00354672
2034-07-11	0.00318848	0.00345769	0.00354659
2034-08-11	0.00328893	0.00346234	0.00351736
2034-09-11	0.00352923	0.00348921	0.00348314
2034-10-11	0.00363517	0.00365177	0.00363289
2034-11-11	0.00363321	0.00363028	0.00359328
2034-12-11	0.00366698	0.00373765	0.00369209
2035-01-11	0.00372321	0.00378162	0.00376607
2035-02-10	0.00372032	0.00370247	0.0037258
2035-03-11	0.00366032	0.00369325	0.00368062
2035-04-11	0.00364291	0.00365792	0.00365032
2035-05-11	0.00330611	0.00362041	0.00361092
2035-06-11	0.0035266	0.00355887	0.00344868
2035-07-11	0.00352951	0.00346563	0.00351847
2035-08-11	0.0034576	0.00353182	0.00354485
2035-09-11	0.00364223	0.00343639	0.00340007
2035-10-11	0.00355858	0.0036036	0.003646
2035-11-11	0.00353705	0.00367517	0.00371573
2035-12-11	0.0036217	0.00369364	0.00368249
2036-01-11	0.00369581	0.00365187	0.00360948
2036-02-10	0.00374623	0.00380158	0.00378483
2036-03-10	0.00370239	0.00370845	0.0037202
2036-04-10	0.00361246	0.00364802	0.00368508
2036-05-10	0.00347543	0.00359687	0.00355845
2036-06-10	0.00346432	0.00351043	0.00353588
2036-07-10	0.00368375	0.00361312	0.00356432
2036-08-10	0.00366626	0.00354825	0.00353356
2036-09-10	0.00342926	0.00359773	0.00361539
2036-10-10	0.00368084	0.00352707	0.00349485
2036-11-10	0.00356072	0.00366935	0.00378507
2036-12-10	0.00364659	0.00365872	0.00368398
2037-01-10	0.00379048	0.00381758	0.00383251
2037-02-09	0.00380463	0.00384024	0.00381689
2037-03-10	0.00364375	0.00376048	0.00377133
2037-04-10	0.00366443	0.00365232	0.00365015
2037-05-10	0.00366646	0.00365373	0.00364598
2037-06-10	0.00371308	0.00371211	0.00366771
2037-07-10	0.00363369	0.00348594	0.00343017
2037-08-10	0.00361331	0.00358213	0.0035436
2037-09-10	0.00345283	0.00354335	0.0035531
2037-10-10	0.0037188	0.00372041	0.00373092
2037-11-10	0.00372028	0.00372281	0.00375297
2037-12-10	0.00373772	0.00378684	0.00380132
2038-01-10	0.0037527	0.00378613	0.0037956
2038-02-09	0.00378845	0.00383105	0.00379261
2038-03-10	0.0037206	0.00374656	0.00374807
2038-04-10	0.00371751	0.0036148	0.00368357
2038-05-10	0.00372119	0.00370007	0.00371505
2038-06-10	0.00350281	0.00366184	0.0036738
2038-07-10	0.00342035	0.00361641	0.00362574
2038-08-10	0.00352784	0.00334048	0.00344194
2038-09-10	0.00359947	0.00364476	0.00374178
2038-10-10	0.00354496	0.00365063	0.00368337
2038-11-10	0.00364368	0.00374398	0.00376395
2038-12-10	0.00374625	0.00385677	0.0038662
2039-01-10	0.00385119	0.00388292	0.00387228
2039-02-09	0.0038036	0.00382175	0.00382045
2039-03-10	0.00380383	0.00380346	0.00378105
2039-04-10	0.00376437	0.00379872	0.00375712
2039-05-10	0.00366845	0.00372751	0.00370977
2039-06-10	0.00364766	0.00369471	0.00371319
2039-07-10	0.00344463	0.00352325	0.00356717
2039-08-10	0.00358601	0.00360566	0.00367896
2039-09-10	0.0033839	0.00354488	0.00366238
2039-10-10	0.00349565	0.00362568	0.00371264
2039-11-10	0.00374417	0.00374617	0.00377615
2039-12-10	0.00369501	0.0038464	0.00383966
2040-01-10	0.00391025	0.00392247	0.00394759
2040-02-09	0.00384641	0.00385112	0.00386436
2040-03-09	0.00384296	0.00381515	0.00377187
2040-04-09	0.00372077	0.00371536	0.00372548
2040-05-09	0.0038048	0.00378057	0.0037439
2040-06-09	0.0035164	0.00368702	0.00366484
2040-07-09	0.0033733	0.00355429	0.00369908
2040-08-09	0.00362488	0.00372581	0.00377832
2040-09-09	0.00384537	0.00374459	0.0037946
2040-10-09	0.00375496	0.00373161	0.00379784
2040-11-09	0.0037988	0.00374948	0.00375433
2040-12-09	0.00376969	0.00384649	0.00388002
2041-01-09	0.00378332	0.00375876	0.0038339
2041-02-08	0.00390841	0.00391598	0.00389805
2041-03-09	0.00377608	0.00383602	0.00384695
2041-04-09	0.00383659	0.00384704	0.00384891
2041-05-09	0.00368583	0.00378498	0.00377708
2041-06-09	0.00381876	0.00371014	0.0037449
2041-07-09	0.00369514	0.00368208	0.00373097
2041-08-09	0.00370719	0.00371157	0.00373278
2041-09-09	0.00380074	0.00375831	0.00377234
2041-10-09	0.00345199	0.00367121	0.00370651
2041-11-09	0.00379998	0.00379177	0.00386304
2041-12-09	0.00386537	0.00389015	0.00394096
2042-01-09	0.00388009	0.00391674	0.00389387
2042-02-08	0.00387037	0.00382144	0.00384454
2042-03-09	0.00388753	0.00386934	0.00381145
2042-04-09	0.00384847	0.00386226	0.00386191
2042-05-09	0.00371002	0.0037933	0.00380886
2042-06-09	0.00383485	0.00382192	0.00377122
2042-07-09	0.0038425	0.00370091	0.00367596
2042-08-09	0.00376009	0.00374713	0.00374563
2042-09-09	0.00368173	0.00352339	0.00343708
2042-10-09	0.00376449	0.0038592	0.00384519
2042-11-09	0.00375691	0.00394111	0.00397903
2042-12-09	0.0038121	0.00381389	0.00380652
2043-01-09	0.00381386	0.00395586	0.00394116
2043-02-08	0.00397795	0.00400811	0.00398721
2043-03-09	0.00387167	0.0039209	0.00392143
2043-04-09	0.00377518	0.00386054	0.00380217
2043-05-09	0.00386252	0.00383098	0.00386159
2043-06-09	0.00376515	0.00377328	0.00384087
2043-07-09	0.00376117	0.00353583	0.0037078
2043-08-09	0.00382492	0.00378479	0.00374733
2043-09-09	0.00364588	0.00384138	0.00378182
2043-10-09	0.00368011	0.00376478	0.00389045
2043-11-09	0.00377819	0.00386433	0.00386769
2043-12-09	0.00387164	0.00396379	0.0039018
2044-01-09	0.00394152	0.0040003	0.00396243
2044-02-08	0.00391637	0.00398047	0.00396979
2044-03-08	0.00384851	0.00391111	0.00387505
2044-04-08	0.00392292	0.00390699	0.00388544
2044-05-08	0.00391121	0.00387431	0.00387079
2044-06-08	0.00381766	0.00383225	0.00385529
2044-07-08	0.00369553	0.00380316	0.00372431
2044-08-08	0.00378772	0.00369236	0.0036635
2044-09-08	0.0037224	0.00375948	0.00384556
2044-10-08	0.00395211	0.0039322	0.00391256
2044-11-08	0.00393709	0.0040011	0.00399108
2044-12-08	0.00391722	0.00392349	0.00393008
2045-01-08	0.00389829	0.0039171	0.00393869
2045-02-07	0.00393333	0.00396556	0.00399624
2045-03-08	0.00397935	0.00398984	0.00399599
2045-04-08	0.00396804	0.00399123	0.00397186
2045-05-08	0.00385662	0.00389012	0.00397152
2045-06-08	0.00382225	0.00381144	0.00383935
2045-07-08	0.00352912	0.00380121	0.00378849
2045-08-08	0.00384598	0.0038607	0.00389601
2045-09-08	0.00386962	0.0036569	0.00381928
2045-10-08	0.00397388	0.00402151	0.00402828
2045-11-08	0.00389054	0.00403357	0.00405874
2045-12-08	0.0040919	0.00416208	0.00415742
2046-01-08	0.00405842	0.00409891	0.0040881
2046-02-07	0.00400236	0.00402846	0.00404252
2046-03-08	0.00394273	0.00402244	0.00404169
2046-04-08	0.00395814	0.0039504	0.0039611
2046-05-08	0.00394415	0.00393811	0.00391259
2046-06-08	0.00395414	0.00398142	0.00396935
2046-07-08	0.00389303	0.0038673	0.003931
2046-08-08	0.00387265	0.0038921	0.00387851
2046-09-08	0.00395461	0.00388075	0.0039017
2046-10-08	0.00386956	0.00393637	0.00401445
2046-11-08	0.00384635	0.0040584	0.00407916
2046-12-08	0.00385418	0.00401034	0.00401883
2047-01-08	0.00405124	0.00406396	0.0040709
2047-02-07	0.00407702	0.00407733	0.0041119
2047-03-08	0.00402969	0.00400485	0.00403405
2047-04-08	0.00400206	0.00401081	0.00403151
2047-05-08	0.00387303	0.00394975	0.00393932
2047-06-08	0.00394537	0.0039293	0.00399087
2047-07-08	0.00381128	0.00392966	0.00385477
2047-08-08	0.00385954	0.00383508	0.00378478
2047-09-08	0.00396853	0.00390632	0.00377199
2047-10-08	0.00385991	0.00388372	0.00388612
2047-11-08	0.00385253	0.00395872	0.00400787
2047-12-08	0.00401833	0.00398513	0.00412681
2048-01-08	0.00413945	0.00418428	0.004191
2048-02-07	0.00411635	0.00412273	0.00412221
2048-03-07	0.00399997	0.00404355	0.00403476
2048-04-07	0.00408238	0.00406834	0.00402882
2048-05-07	0.00403011	0.00404772	0.00402742
2048-06-07	0.00397126	0.00399962	0.00398881
2048-07-07	0.00390409	0.00390845	0.00389893
2048-08-07	0.00372321	0.00385656	0.00393281
2048-09-07	0.00403802	0.00395444	0.00400726
2048-10-07	0.00412924	0.00410822	0.00403437
2048-11-07	0.00398923	0.00396229	0.00403746
2048-12-07	0.00407552	0.00410978	0.00414086
2049-01-07	0.00412538	0.00412711	0.00413339
2049-02-06	0.00411335	0.00414552	0.00415898
2049-03-07	0.00409642	0.00411712	0.00409114
2049-04-07	0.00401031	0.00402413	0.00406357
2049-05-07	0.00407959	0.00404918	0.0039722
2049-06-07	0.0039091	0.00391961	0.00399721
2049-07-07	0.00377885	0.0038911	0.00394731
2049-08-07	0.00392527	0.00392649	0.00387941
2049-09-07	0.00392775	0.00402546	0.00405542
2049-10-07	0.00394056	0.00408038	0.00411351
2049-11-07	0.0041087	0.00418871	0.00417078
2049-12-07	0.00412867	0.00422367	0.00421753
2050-01-07	0.00415636	0.00419672	0.00417882
2050-02-06	0.00421123	0.00422582	0.00420906
2050-03-07	0.00413209	0.00413969	0.00412648
2050-04-07	0.0041081	0.00406538	0.00409064
2050-05-07	0.00413242	0.00409389	0.00411919
2050-06-07	0.00397058	0.00408578	0.00407171
2050-07-07	0.00402614	0.00394407	0.00403252
2050-08-07	0.00390406	0.00394188	0.00400155
2050-09-07	0.00395288	0.00403704	0.0040719
2050-10-07	0.00402987	0.00413868	0.00412297
2050-11-07	0.00399505	0.00409068	0.00414206
2050-12-07	0.00406568	0.00419012	0.00418563
2051-01-07 12:00:00	0.00422729	0.00425575	0.00426171
2051-02-06	0.00419322	0.00420002	0.00420982
2051-03-07 12:00:00	0.00414928	0.00412181	0.00417414
2051-04-07	0.00410769	0.00412148	0.00411449
2051-05-07 12:00:00	0.00417378	0.00411938	0.00413326
2051-06-07	0.00399828	0.0040497	0.00399297
2051-07-07 12:00:00	0.00394445	0.00404048	0.00402329
2051-08-07 12:00:00	0.00377638	0.00382883	0.00384512
2051-09-07	0.00401541	0.00408507	0.00405083
2051-10-07 12:00:00	0.00420395	0.00415616	0.00421328
2051-11-07	0.00409357	0.00410908	0.00406517
2051-12-07 12:00:00	0.00420139	0.00427565	0.00430038
2052-01-07 12:00:00	0.0041708	0.0042434	0.00425605
2052-02-06	0.00423174	0.00425216	0.00425917
2052-03-06 12:00:00	0.00423663	0.00425771	0.00425696
2052-04-06	0.00416355	0.00420388	0.00417894
2052-05-06 12:00:00	0.00405346	0.00411454	0.00415499
2052-06-06	0.00403365	0.00419826	0.00417522
2052-07-06 12:00:00	0.00407915	0.00413811	0.00411663
2052-08-06 12:00:00	0.00407144	0.00396482	0.00397244
2052-09-06	0.00406663	0.00407854	0.00406824
2052-10-06 12:00:00	0.00421835	0.00421316	0.0042112
2052-11-06	0.00411866	0.00419271	0.00420567
2052-12-06 12:00:00	0.00425268	0.00433308	0.00432034
2053-01-06 12:00:00	0.0042066	0.00428942	0.00426682
2053-02-05	0.0042167	0.00426978	0.00425973
2053-03-06 12:00:00	0.00418197	0.00422531	0.00421996
2053-04-06	0.00412863	0.00420014	0.00420276
2053-05-06 12:00:00	0.00413743	0.00414848	0.00423466
2053-06-06	0.00400212	0.00410645	0.00415555
2053-07-06 12:00:00	0.0041167	0.00409821	0.00422687
2053-08-06 12:00:00	0.00405441	0.00405013	0.00406186
2053-09-06	0.00415255	0.00412492	0.00416699
2053-10-06 12:00:00	0.00414435	0.0041296	0.00402111
2053-11-06	0.00404424	0.00423253	0.00427064
2053-12-06 12:00:00	0.00407745	0.00424988	0.00424465
2054-01-06 12:00:00	0.004254	0.00429981	0.00427877
2054-02-05	0.00427376	0.00426846	0.00427786
2054-03-06 12:00:00	0.00417512	0.00427747	0.00426702
2054-04-06	0.00423697	0.00419529	0.00417051
2054-05-06 12:00:00	0.00410155	0.00418268	0.00415456
2054-06-06	0.00415464	0.00400014	0.00410993
2054-07-06 12:00:00	0.00397122	0.00414738	0.00418142
2054-08-06 12:00:00	0.00392689	0.00408187	0.0041093
2054-09-06	0.00419411	0.00416052	0.0041615
2054-10-06 12:00:00	0.00411352	0.00407756	0.00410025
2054-11-06	0.00424637	0.00421751	0.00418476
2054-12-06 12:00:00	0.00415562	0.00427205	0.00427682
2055-01-06 12:00:00	0.00425567	0.00433798	0.00435333
2055-02-05	0.0042413	0.00431979	0.0043571
2055-03-06 12:00:00	0.00433352	0.00430405	0.00431417
2055-04-06	0.00423529	0.00423061	0.00424176
2055-05-06 12:00:00	0.00418464	0.00425174	0.00421903
2055-06-06	0.00417313	0.00419918	0.00420319
2055-07-06 12:00:00	0.00410077	0.00415684	0.0041357
2055-08-06 12:00:00	0.0041431	0.00407042	0.00404597
2055-09-06	0.00407812	0.0040163	0.00405388
2055-10-06 12:00:00	0.00434075	0.00433131	0.00431492
2055-11-06	0.00410966	0.00405701	0.00418988
2055-12-06 12:00:00	0.00431417	0.00441326	0.00440885
2056-01-06 12:00:00	0.00433898	0.00438187	0.00437767
2056-02-05	0.00433465	0.0043816	0.0043546
2056-03-05 12:00:00	0.00428082	0.00435368	0.00435768
2056-04-05	0.00433764	0.00433096	0.00431811
2056-05-05 12:00:00	0.00428617	0.00425302	0.00424394
2056-06-05	0.00417036	0.0042359	0.00429019
2056-07-05 12:00:00	0.00425125	0.00421396	0.00410579
2056-08-05 12:00:00	0.00422569	0.00417434	0.00417505
2056-09-05	0.00432205	0.00428592	0.00430928
2056-10-05 12:00:00	0.00428734	0.00433949	0.00431501
2056-11-05	0.0042444	0.00437001	0.00435743
2056-12-05 12:00:00	0.00428342	0.00434793	0.0043807
2057-01-05 12:00:00	0.00441302	0.00443008	0.00444879
2057-02-04	0.00436724	0.00437902	0.00441176
2057-03-05 12:00:00	0.00435013	0.00435256	0.004302
2057-04-05	0.00404168	0.00426916	0.00429002
2057-05-05 12:00:00	0.00403298	0.00428606	0.00424159
2057-06-05	0.00429014	0.00426615	0.00430075
2057-07-05 12:00:00	0.00411096	0.00424609	0.00424116
2057-08-05 12:00:00	0.00414471	0.0041618	0.00414395
2057-09-05	0.00415767	0.00417694	0.00421544
2057-10-05 12:00:00	0.00432283	0.0043478	0.00435238
2057-11-05	0.00432534	0.00430854	0.00432292
2057-12-05 12:00:00	0.00435641	0.00440203	0.00445277
2058-01-05 12:00:00	0.00439825	0.00448678	0.00449516
2058-02-04	0.00439651	0.00442424	0.00442992
2058-03-05 12:00:00	0.00430778	0.00433861	0.0043223
2058-04-05	0.0042338	0.00433996	0.0043325
2058-05-05 12:00:00	0.00420036	0.00424424	0.00424863
2058-06-05	0.00419237	0.00430742	0.0042148
2058-07-05 12:00:00	0.00404224	0.00421796	0.00417288
2058-08-05 12:00:00	0.00435638	0.00433077	0.00421957
2058-09-05	0.00423322	0.00427529	0.00428573
2058-10-05 12:00:00	0.00429643	0.00419133	0.00428763
2058-11-05	0.0043103	0.00433087	0.00434816
2058-12-05 12:00:00	0.00445672	0.0044783	0.00449888
2059-01-05 12:00:00	0.00434156	0.00435783	0.00439169
2059-02-04	0.00440955	0.00441866	0.00439692
2059-03-05 12:00:00	0.00444827	0.00444245	0.00444579
2059-04-05	0.00438389	0.00435641	0.0043806
2059-05-05 12:00:00	0.00440134	0.00434358	0.00438686
2059-06-05	0.00422315	0.0042897	0.00425257
2059-07-05 12:00:00	0.00419078	0.00427917	0.00427562
2059-08-05 12:00:00	0.00410786	0.00423292	0.00427161
2059-09-05	0.00424436	0.00438459	0.00440187
2059-10-05 12:00:00	0.00438454	0.00442202	0.0043751
2059-11-05	0.00435677	0.00437835	0.00443896
2059-12-05 12:00:00	0.0045036	0.00452262	0.00453455
2060-01-05 12:00:00	0.00443569	0.00450408	0.00450947
2060-02-04	0.00447275	0.00444388	0.00444063
2060-03-04 12:00:00	0.00439847	0.0044334	0.00442796
2060-04-04	0.00440791	0.00441986	0.00442098
2060-05-04 12:00:00	0.00445267	0.00442989	0.00439316
2060-06-04	0.00436743	0.00436639	0.00439129
2060-07-04 12:00:00	0.00437484	0.00436445	0.00436016
2060-08-04 12:00:00	0.00432449	0.00423619	0.00423459
2060-09-04	0.00441058	0.00441232	0.00439953
2060-10-04 12:00:00	0.00436636	0.00439356	0.00440642
2060-11-04	0.00424525	0.0044465	0.00449687
2060-12-04 12:00:00	0.00434818	0.00448891	0.00449684
2061-01-04 12:00:00	0.00447493	0.0044357	0.00451462
2061-02-03	0.00449451	0.00449765	0.00448998
2061-03-04 12:00:00	0.00444833	0.00449755	0.00450265
2061-04-04	0.00439945	0.00441653	0.00438672
2061-05-04 12:00:00	0.00438963	0.00437555	0.00443862
2061-06-04	0.00434004	0.00436485	0.00435971
2061-07-04 12:00:00	0.00416873	0.00415008	0.00423142
2061-08-04 12:00:00	0.0042194	0.00430533	0.00435118
2061-09-04	0.00439299	0.00439168	0.00437956
2061-10-04 12:00:00	0.00416286	0.00442452	0.0044935
2061-11-04	0.00438042	0.00445765	0.00447708
2061-12-04 12:00:00	0.00451041	0.00454551	0.00452363
2062-01-04 12:00:00	0.00457048	0.00461738	0.00461326
2062-02-03	0.00450755	0.00456459	0.00456519
2062-03-04 12:00:00	0.00445304	0.00450399	0.00450928
2062-04-04	0.00443171	0.0044869	0.00446803
2062-05-04 12:00:00	0.00437428	0.00444754	0.00444552
2062-06-04	0.00441008	0.00443723	0.00442661
2062-07-04 12:00:00	0.00444017	0.00444401	0.00444485
2062-08-04 12:00:00	0.00426123	0.00424678	0.00424371
2062-09-04	0.0042971	0.0043698	0.00434371
2062-10-04 12:00:00	0.00438422	0.00423282	0.00434945
2062-11-04	0.00443526	0.00445767	0.00441768
2062-12-04 12:00:00	0.00449779	0.00452558	0.00453906
2063-01-04 12:00:00	0.00451978	0.00448346	0.0045642
2063-02-03	0.00457854	0.00460174	0.00459085
2063-03-04 12:00:00	0.00454499	0.00453715	0.00455642
2063-04-04	0.00446472	0.00442042	0.00445094
2063-05-04 12:00:00	0.00445948	0.00449111	0.00447048
2063-06-04	0.00446496	0.004295	0.00439393
2063-07-04 12:00:00	0.00433585	0.00436962	0.0042162
2063-08-04 12:00:00	0.00441009	0.00436604	0.00419201
2063-09-04	0.00439845	0.00441521	0.00439702
2063-10-04 12:00:00	0.00451343	0.00437513	0.00443474
2063-11-04	0.00438654	0.00444221	0.0044031
2063-12-04 12:00:00	0.00451983	0.00456745	0.0045731
2064-01-04 12:00:00	0.00453729	0.00457504	0.00461535
2064-02-03	0.00458327	0.00463404	0.00462261
2064-03-03 12:00:00	0.00454816	0.00458118	0.00458631
2064-04-03	0.00442879	0.00442537	0.00443491
2064-05-03 12:00:00	0.00443693	0.00451805	0.0045035
2064-06-03	0.0044292	0.00445483	0.00446739
2064-07-03 12:00:00	0.00440601	0.00437354	0.00442933
2064-08-03 12:00:00	0.00436048	0.00409847	0.00424269
2064-09-03	0.0044888	0.00449624	0.00446179
2064-10-03 12:00:00	0.00448351	0.00458519	0.00460247
2064-11-03	0.0044248	0.00453282	0.00451961
2064-12-03 12:00:00	0.00464837	0.00468475	0.00468204
2065-01-03 12:00:00	0.00459058	0.00464157	0.00460161
2065-02-02	0.0046262	0.00463684	0.00464538
2065-03-03 12:00:00	0.00455307	0.00456023	0.00457659
2065-04-03	0.00456992	0.00456401	0.00455755
2065-05-03 12:00:00	0.0045174	0.00454269	0.00457027
2065-06-03	0.00451426	0.00454734	0.00457252
2065-07-03 12:00:00	0.00452937	0.00448004	0.00449316
2065-08-03 12:00:00	0.00453362	0.00451878	0.00448893
2065-09-03	0.00445934	0.00433252	0.00436542
2065-10-03 12:00:00	0.00439672	0.00450947	0.00456198
2065-11-03	0.00454824	0.00460902	0.00460382
2065-12-03 12:00:00	0.00454942	0.00456046	0.00462118
2066-01-03 12:00:00	0.00462963	0.00462385	0.00462756
2066-02-02	0.00465273	0.00466254	0.00462954
2066-03-03 12:00:00	0.00457337	0.00460357	0.00461352
2066-04-03	0.00457093	0.00456613	0.00454192
2066-05-03 12:00:00	0.00447659	0.00451688	0.00454699
2066-06-03	0.0044723	0.00452311	0.00455842
2066-07-03 12:00:00	0.00445653	0.00441078	0.00452821
2066-08-03 12:00:00	0.0043611	0.00433989	0.00453984
2066-09-03	0.00448906	0.00447348	0.00453409
2066-10-03 12:00:00	0.00448497	0.00441161	0.00457142
2066-11-03	0.00460729	0.00470416	0.00471261
2066-12-03 12:00:00	0.00446594	0.00466386	0.00466706
2067-01-03 12:00:00	0.00470125	0.00472686	0.00472865
2067-02-02	0.00470072	0.00469656	0.0046876
2067-03-03 12:00:00	0.00464885	0.00465232	0.00464872
2067-04-03	0.00458828	0.00457672	0.00453263
2067-05-03 12:00:00	0.00452014	0.0045645	0.00457507
2067-06-03	0.00451295	0.00455532	0.00461498
2067-07-03 12:00:00	0.00417827	0.00445839	0.00443088
2067-08-03 12:00:00	0.00450865	0.00451613	0.00454111
2067-09-03	0.00462347	0.00462106	0.00465308
2067-10-03 12:00:00	0.00435961	0.00444041	0.00453709
2067-11-03	0.00461787	0.0046535	0.00466211
2067-12-03 12:00:00	0.0044476	0.0045945	0.00462984
2068-01-03 12:00:00	0.00444175	0.00468877	0.00469169
2068-02-02	0.00471765	0.00471732	0.00472396
2068-03-02 12:00:00	0.00468751	0.00468551	0.00469037
2068-04-02	0.00460991	0.00464435	0.00456285
2068-05-02 12:00:00	0.00445576	0.0045655	0.00452084
2068-06-02	0.00461394	0.00464094	0.00468735
2068-07-02 12:00:00	0.00465343	0.00460662	0.00455052
2068-08-02 12:00:00	0.00431662	0.00441222	0.00451046
2068-09-02	0.00433433	0.00458654	0.00445821
2068-10-02 12:00:00	0.00462811	0.00462686	0.00463989
2068-11-02	0.0046397	0.00471683	0.00470003
2068-12-02 12:00:00	0.00450017	0.00459591	0.00466138
2069-01-02 12:00:00	0.00453146	0.00441794	0.0045313
2069-02-01	0.00467101	0.00472053	0.00469996
2069-03-02 12:00:00	0.00470815	0.00471675	0.00468288
2069-04-02	0.00468414	0.00467797	0.00466016
2069-05-02 12:00:00	0.00463825	0.00463012	0.00467876
2069-06-02	0.00434334	0.00458518	0.00456838
2069-07-02 12:00:00	0.00413869	0.00438178	0.00444854
2069-08-02 12:00:00	0.00447131	0.00462626	0.00460217
2069-09-02	0.00454495	0.00453138	0.00446094
2069-10-02 12:00:00	0.00444579	0.00453936	0.00451327
2069-11-02	0.0046816	0.00476222	0.00478267
2069-12-02 12:00:00	0.00468356	0.00479045	0.00482075
2070-01-02 12:00:00	0.00478778	0.00480233	0.00480776
2070-02-01	0.00473225	0.004737	0.00473744
2070-03-02 12:00:00	0.00474746	0.00475264	0.00473933
2070-04-02	0.00468476	0.00464802	0.00461526
2070-05-02 12:00:00	0.00451003	0.00466318	0.00466425
2070-06-02	0.00408862	0.00453449	0.00450949
2070-07-02 12:00:00	0.004596	0.00459588	0.00438978
2070-08-02 12:00:00	0.0043389	0.00443606	0.0044297
2070-09-02	0.00458987	0.0046516	0.00466314
2070-10-02 12:00:00	0.00474437	0.0046281	0.00470745
2070-11-02	0.00476718	0.00476611	0.00473196
2070-12-02 12:00:00	0.0047309	0.00477663	0.00481307
2071-01-02 12:00:00	0.00469854	0.00475122	0.00477159
2071-02-01	0.00483175	0.00482229	0.00480031
2071-03-02 12:00:00	0.00480035	0.00481486	0.00481176
2071-04-02	0.00475248	0.00476227	0.00475625
2071-05-02 12:00:00	0.00468319	0.00473344	0.00469451
2071-06-02	0.00460618	0.00469146	0.00468029
2071-07-02 12:00:00	0.00439197	0.00463761	0.00454475
2071-08-02 12:00:00	0.00462787	0.00468775	0.00468692
2071-09-02	0.00472485	0.00463892	0.00464184
2071-10-02 12:00:00	0.00472438	0.0047315	0.00465767
2071-11-02	0.0046833	0.00471506	0.00471819
2071-12-02 12:00:00	0.00466822	0.00480201	0.00483247
2072-01-02 12:00:00	0.00482225	0.00486257	0.0048662
2072-02-01	0.00482627	0.00485719	0.00487833
2072-03-01 12:00:00	0.00478146	0.00478948	0.00476528
2072-04-01	0.00462165	0.00469755	0.00473048
2072-05-01 12:00:00	0.00455557	0.00466501	0.00470602
2072-06-01	0.00478007	0.00476886	0.0047661
2072-07-01 12:00:00	0.00469721	0.00472551	0.00468891
2072-08-01 12:00:00	0.00470059	0.0046802	0.00463946
2072-09-01	0.00461493	0.00455405	0.00450904
2072-10-01 12:00:00	0.00479281	0.00474773	0.00477019
2072-11-01	0.00481346	0.00483485	0.00486373
2072-12-01 12:00:00	0.00487999	0.00489994	0.00486765
2073-01-01 12:00:00	0.00481965	0.00486006	0.00486794
2073-01-31	0.00485278	0.00486864	0.00486372
2073-03-01 12:00:00	0.00466991	0.00479223	0.00482821
2073-04-01	0.00477708	0.00478998	0.00477041
2073-05-01 12:00:00	0.00476683	0.00475997	0.00475062
2073-06-01	0.00466264	0.00477943	0.00482158
2073-07-01 12:00:00	0.00456123	0.0045665	0.00431257
2073-08-01 12:00:00	0.00479758	0.00443487	0.00464024
2073-09-01	0.0046259	0.00470276	0.00465878
2073-10-01 12:00:00	0.00469491	0.00463047	0.00480139
2073-11-01	0.00475768	0.00481159	0.00476444
2073-12-01 12:00:00	0.00485972	0.00491102	0.00491306
2074-01-01 12:00:00	0.00479963	0.00487264	0.00491674
2074-01-31	0.00492251	0.00493406	0.00492038
2074-03-01 12:00:00	0.00483612	0.00483637	0.00486919
2074-04-01	0.0048662	0.0047844	0.00482087
2074-05-01 12:00:00	0.00470649	0.00480943	0.0048197
2074-06-01	0.00439548	0.00470813	0.00461012
2074-07-01 12:00:00	0.0047414	0.00466051	0.00470791
2074-08-01 12:00:00	0.00452078	0.00465073	0.00455479
2074-09-01	0.00479827	0.00481099	0.00472855
2074-10-01 12:00:00	0.00482845	0.00484729	0.00481273
2074-11-01	0.00469576	0.00481304	0.00484907
2074-12-01 12:00:00	0.00488718	0.00494988	0.00496782
2075-01-01 12:00:00	0.00491448	0.00494447	0.00495558
2075-01-31	0.00492598	0.00494105	0.00493064
2075-03-01 12:00:00	0.00489945	0.00491025	0.00490208
2075-04-01	0.00484586	0.00484927	0.00483288
2075-05-01 12:00:00	0.00477275	0.00480901	0.00479521
2075-06-01	0.00483739	0.00485269	0.0048522
2075-07-01 12:00:00	0.00458421	0.00475063	0.00482394
2075-08-01 12:00:00	0.0046885	0.0048217	0.00473074
2075-09-01	0.00470994	0.0047723	0.00477234
2075-10-01 12:00:00	0.0048048	0.0048731	0.00489187
2075-11-01	0.00481611	0.00484769	0.00487223
2075-12-01 12:00:00	0.00487458	0.00495476	0.00498688
2076-01-01 12:00:00	0.00489319	0.00493185	0.00494725
2076-01-31	0.00491128	0.00493162	0.0049508
2076-02-29 12:00:00	0.00480425	0.0048633	0.00484714
2076-03-31	0.00486783	0.00483639	0.00483835
2076-04-30 12:00:00	0.00473595	0.00483793	0.00481213
2076-05-31	0.00477073	0.00474445	0.0047751
2076-06-30 12:00:00	0.00478403	0.00484178	0.00477888
2076-07-31 12:00:00	0.00467669	0.00467712	0.0046271
2076-08-31	0.00473751	0.00473542	0.00469967
2076-09-30 12:00:00	0.00480499	0.00460033	0.00478217
2076-10-31	0.00493033	0.00495444	0.00495855
2076-11-30 12:00:00	0.00488409	0.00491839	0.00495407
2076-12-31 12:00:00	0.00492277	0.00494524	0.0049606
2077-01-30	0.00494182	0.00491551	0.00495843
2077-02-28 12:00:00	0.00487151	0.00492808	0.00491962
2077-03-31	0.00492727	0.00493596	0.00493862
2077-04-30 12:00:00	0.00486364	0.00486132	0.00483124
2077-05-31	0.00488422	0.00486576	0.00490989
2077-06-30 12:00:00	0.00487043	0.00478647	0.00478069
2077-07-31 12:00:00	0.00483511	0.00483365	0.00483822
2077-08-31	0.0048574	0.00482846	0.00488153
2077-09-30 12:00:00	0.00488697	0.00487106	0.00482038
2077-10-31	0.00489925	0.00484064	0.00486706
2077-11-30 12:00:00	0.00492489	0.00497615	0.00496253
2077-12-31 12:00:00	0.00486572	0.0049784	0.00496497
2078-01-30	0.00494562	0.0048935	0.00494052
2078-02-28 12:00:00	0.00492858	0.0049272	0.00490344
2078-03-31	0.00493899	0.00492672	0.00491305
2078-04-30 12:00:00	0.00483145	0.00489723	0.00488946
2078-05-31	0.00456337	0.0047251	0.0046666
2078-06-30 12:00:00	0.00481516	0.00485514	0.00475226
2078-07-31 12:00:00	0.00454096	0.00462022	0.0045545
2078-08-31	0.00475162	0.00456541	0.00434442
2078-09-30 12:00:00	0.00463064	0.00488567	0.00490017
2078-10-31	0.00488968	0.00498059	0.00499136
2078-11-30 12:00:00	0.00495349	0.00498581	0.00501096
2078-12-31 12:00:00	0.00502153	0.00505637	0.00506979
2079-01-30	0.00499914	0.00498223	0.00500178
2079-02-28 12:00:00	0.00494887	0.00493886	0.0049643
2079-03-31	0.00489666	0.00493862	0.0049069
2079-04-30 12:00:00	0.00466772	0.0048841	0.00486609
2079-05-31	0.00494794	0.00490673	0.00491178
2079-06-30 12:00:00	0.00479086	0.00489037	0.0048684
2079-07-31 12:00:00	0.00466158	0.00473636	0.0047737
2079-08-31	0.00489793	0.00493099	0.00491746
2079-09-30 12:00:00	0.00491995	0.00486551	0.0049378
2079-10-31	0.00485105	0.00490675	0.00499745
2079-11-30 12:00:00	0.00491638	0.00494202	0.004904
2079-12-31 12:00:00	0.00501255	0.00502501	0.00503688
2080-01-30	0.00493788	0.00495004	0.00502927
2080-02-28 12:00:00	0.00496316	0.00498406	0.00498648
2080-03-30	0.00492805	0.00494929	0.00493646
2080-04-29 12:00:00	0.00488629	0.00495264	0.00492812
2080-05-30	0.00483181	0.00489137	0.00480547
2080-06-29 12:00:00	0.00487697	0.00492317	0.00489395
2080-07-30 12:00:00	0.00476067	0.00473893	0.00477742
2080-08-30	0.00394068	0.00488771	0.00485019
2080-09-29 12:00:00	0.00497669	0.00489473	0.00492312
2080-10-30	0.00487684	0.00497454	0.00502048
2080-11-29 12:00:00	0.00498983	0.00505692	0.00510556
2080-12-30 12:00:00	0.00494801	0.00501793	0.00505868
2081-01-29	0.00505191	0.00504044	0.00505211
2081-02-27 12:00:00	0.0049774	0.00501344	0.00499982
2081-03-30	0.00502177	0.00500516	0.00501377
2081-04-29 12:00:00	0.00499257	0.00496552	0.00496556
2081-05-30	0.00490897	0.00471755	0.00479351
2081-06-29 12:00:00	0.00488199	0.00496455	0.00490384
2081-07-30 12:00:00	0.00478409	0.00482436	0.00490747
2081-08-30	0.00488386	0.00490244	0.00478854
2081-09-29 12:00:00	0.00492767	0.00494816	0.00497197
2081-10-30	0.00460844	0.00466926	0.00491687
2081-11-29 12:00:00	0.00491366	0.00505754	0.00508455
2081-12-30 12:00:00	0.00501659	0.00505744	0.00507937
2082-01-29	0.00499543	0.00499646	0.00503465
2082-02-27 12:00:00	0.00502786	0.00504166	0.00505795
2082-03-30	0.00501108	0.00499481	0.00497572
2082-04-29 12:00:00	0.00497279	0.0050177	0.00497855
2082-05-30	0.00455735	0.00495375	0.00498217
2082-06-29 12:00:00	0.00477547	0.00486554	0.00484586
2082-07-30 12:00:00	0.00492391	0.0048306	0.00487868
2082-08-30	0.00482534	0.00492127	0.00498402
2082-09-29 12:00:00	0.00497432	0.00502848	0.00491751
2082-10-30	0.00493035	0.00502403	0.0050062
2082-11-29 12:00:00	0.00505876	0.00510972	0.00509254
2082-12-30 12:00:00	0.00497004	0.0050971	0.00510082
2083-01-29	0.00501424	0.00506533	0.00507096
2083-02-27 12:00:00	0.00507415	0.00506448	0.00506078
2083-03-30	0.00505059	0.0049927	0.00504998
2083-04-29 12:00:00	0.00499035	0.00501551	0.00499832
2083-05-30	0.00483062	0.00494834	0.00500146
2083-06-29 12:00:00	0.00446051	0.00492328	0.00502157
2083-07-30 12:00:00	0.00484783	0.00483087	0.00490974
2083-08-30	0.00482917	0.00494826	0.00494575
2083-09-29 12:00:00	0.00505181	0.0050628	0.00505655
2083-10-30	0.00489424	0.00507372	0.00497903
2083-11-29 12:00:00	0.0049808	0.00510001	0.00514518
2083-12-30 12:00:00	0.00503635	0.00509746	0.00512133
2084-01-29	0.00505606	0.00507013	0.00505285
2084-02-27 12:00:00	0.00506978	0.00512074	0.00514772
2084-03-29	0.00499122	0.00501759	0.00503201
2084-04-28 12:00:00	0.00500115	0.00489925	0.00495703
2084-05-29	0.00492242	0.00495481	0.00494964
2084-06-28 12:00:00	0.00478612	0.00490603	0.0047924
2084-07-29 12:00:00	0.00504148	0.00501129	0.00497246
2084-08-29	0.00496351	0.00492374	0.00502857
2084-09-28 12:00:00	0.00474998	0.00495605	0.00501863
2084-10-29	0.00505471	0.00504527	0.00511833
2084-11-28 12:00:00	0.00500639	0.00513484	0.00517953
2084-12-29 12:00:00	0.00506672	0.00511034	0.00514463
2085-01-28	0.00508798	0.00508512	0.00512215
2085-02-26 12:00:00	0.00509766	0.00509579	0.0051024
2085-03-29	0.00490575	0.0050539	0.00503813
2085-04-28 12:00:00	0.00506776	0.0050678	0.00503636
2085-05-29	0.00465882	0.0049547	0.00494729
2085-06-28 12:00:00	0.00496909	0.00503805	0.00502368
2085-07-29 12:00:00	0.00499187	0.00494522	0.00482678
2085-08-29	0.00501348	0.0050232	0.00500093
2085-09-28 12:00:00	0.0050621	0.00507812	0.00503065
2085-10-29	0.00510691	0.00509523	0.00514446
2085-11-28 12:00:00	0.00494682	0.00507889	0.00509225
2085-12-29 12:00:00	0.00512824	0.00515179	0.00510563
2086-01-28	0.00514469	0.00515513	0.00513476
2086-02-26 12:00:00	0.00502675	0.00507063	0.00506462
2086-03-29	0.00504195	0.00506797	0.00504887
2086-04-28 12:00:00	0.00490494	0.00498226	0.00501849
2086-05-29	0.0048738	0.00498798	0.0049649
2086-06-28 12:00:00	0.00481898	0.00496844	0.00501738
2086-07-29 12:00:00	0.00500358	0.00501864	0.00503273
2086-08-29	0.00502877	0.00496694	0.00503857
2086-09-28 12:00:00	0.0050275	0.00503772	0.00504316
2086-10-29	0.005146	0.00513066	0.00516732
2086-11-28 12:00:00	0.00506778	0.00512607	0.00514214
2086-12-29 12:00:00	0.00514937	0.00517494	0.00516532
2087-01-28	0.00512864	0.00516534	0.00515572
2087-02-26 12:00:00	0.00518484	0.00517774	0.00519315
2087-03-29	0.0050815	0.00509571	0.00506952
2087-04-28 12:00:00	0.0049794	0.00506552	0.00507214
2087-05-29	0.00513431	0.00511474	0.00513534
2087-06-28 12:00:00	0.00504967	0.00501965	0.0049616
2087-07-29 12:00:00	0.00477878	0.0049023	0.00492932
2087-08-29	0.0051114	0.00504571	0.00505576
2087-09-28 12:00:00	0.00512546	0.0051287	0.00507767
2087-10-29	0.00509291	0.00513436	0.00512588
2087-11-28 12:00:00	0.00506312	0.00520694	0.0052235
2087-12-29 12:00:00	0.00501128	0.00509907	0.00514396
2088-01-28	0.00514864	0.00517569	0.00517516
2088-02-26 12:00:00	0.00510672	0.00515818	0.00514038
2088-03-28	0.00497248	0.00510589	0.00509375
2088-04-27 12:00:00	0.00512816	0.00512403	0.00513288
2088-05-28	0.00505205	0.00510352	0.00508435
2088-06-27 12:00:00	0.00481795	0.0049834	0.00503018
2088-07-28 12:00:00	0.00503331	0.00497294	0.0050565
2088-08-28	0.00512945	0.00511102	0.00514998
2088-09-27 12:00:00	0.00508748	0.00497709	0.00504183
2088-10-28	0.00511862	0.00515189	0.00516215
2088-11-27 12:00:00	0.00520823	0.00521463	0.0052252
2088-12-28 12:00:00	0.00518186	0.00521289	0.00522907
2089-01-27	0.005238	0.00524609	0.005245
2089-02-25 12:00:00	0.00512277	0.00515553	0.00512959
2089-03-28	0.00517888	0.00517285	0.00516366
2089-04-27 12:00:00	0.00511491	0.0051252	0.00513269
2089-05-28	0.00514044	0.00511736	0.0050585
2089-06-27 12:00:00	0.00464766	0.00495978	0.00482576
2089-07-28 12:00:00	0.00496008	0.00505112	0.00491691
2089-08-28	0.00502265	0.00506545	0.00502948
2089-09-27 12:00:00	0.00515281	0.00513799	0.00511088
2089-10-28	0.00508699	0.00515563	0.00513607
2089-11-27 12:00:00	0.00511978	0.00517824	0.0052214
2089-12-28 12:00:00	0.00520477	0.00519514	0.00521968
2090-01-27	0.005197	0.00519161	0.00517045
2090-02-25 12:00:00	0.00512091	0.00511274	0.00516842
2090-03-28	0.0051041	0.00509894	0.00511446
2090-04-27 12:00:00	0.00516577	0.00515137	0.00514982
2090-05-28	0.00492378	0.00503624	0.00509754
2090-06-27 12:00:00	0.00501866	0.00504694	0.00507552
2090-07-28 12:00:00	0.00478543	0.00485327	0.00496197
2090-08-28	0.00506253	0.00512625	0.00512118
2090-09-27 12:00:00	0.00515856	0.00507475	0.00511035
2090-10-28	0.0051571	0.00516373	0.00514419
2090-11-27 12:00:00	0.00505824	0.00514805	0.0052626
2090-12-28 12:00:00	0.00526149	0.00522663	0.00527184
2091-01-27	0.00519888	0.00519449	0.00524056
2091-02-25 12:00:00	0.00521678	0.00523776	0.00521777
2091-03-28	0.00521206	0.00521711	0.00524417
2091-04-27 12:00:00	0.0051501	0.00505559	0.00510466
2091-05-28	0.00506467	0.00511167	0.00518688
2091-06-27 12:00:00	0.00503206	0.00506097	0.00512206
2091-07-28 12:00:00	0.00503323	0.00511528	0.00511715
2091-08-28	0.00503003	0.0049241	0.00477471
2091-09-27 12:00:00	0.00499814	0.00509422	0.00519658
2091-10-28	0.00517756	0.00521923	0.00523939
2091-11-27 12:00:00	0.00505032	0.00517314	0.00524622
2091-12-28 12:00:00	0.00525873	0.00524346	0.00524687
2092-01-27	0.00521253	0.00524309	0.00523162
2092-02-25 12:00:00	0.00524531	0.00523987	0.00524728
2092-03-27	0.00519337	0.00520562	0.005183
2092-04-26 12:00:00	0.00509623	0.00515873	0.00514586
2092-05-27	0.00511552	0.0051501	0.00517689
2092-06-26 12:00:00	0.00502376	0.00498537	0.00504325
2092-07-27 12:00:00	0.00505755	0.005154	0.00515656
2092-08-27	0.00484304	0.00493876	0.00487539
2092-09-26 12:00:00	0.00500404	0.00514235	0.00511233
2092-10-27	0.00514622	0.00522377	0.0052734
2092-11-26 12:00:00	0.00515986	0.00512933	0.00526844
2092-12-27 12:00:00	0.00516508	0.00519208	0.00522815
2093-01-26	0.00490295	0.00523104	0.00526844
2093-02-24 12:00:00	0.00523854	0.00526953	0.00527864
2093-03-27	0.00522281	0.00520718	0.00520977
2093-04-26 12:00:00	0.00520059	0.00515321	0.00521732
2093-05-27	0.00507296	0.00515547	0.00510224
2093-06-26 12:00:00	0.00492297	0.00494343	0.00487997
2093-07-27 12:00:00	0.00506922	0.00514286	0.00513709
2093-08-27	0.0050669	0.0049551	0.00496203
2093-09-26 12:00:00	0.00522702	0.00525442	0.00522866
2093-10-27	0.00520796	0.00518589	0.00516483
2093-11-26 12:00:00	0.00517952	0.00523244	0.00524802
2093-12-27 12:00:00	0.0052733	0.00529202	0.00534492
2094-01-26	0.00523925	0.00524419	0.00525876
2094-02-24 12:00:00	0.0052384	0.00525281	0.00523072
2094-03-27	0.00524209	0.00523303	0.00523003
2094-04-26 12:00:00	0.00514607	0.00519729	0.00519686
2094-05-27	0.0051978	0.00522303	0.0052442
2094-06-26 12:00:00	0.00490599	0.00484465	0.00500053
2094-07-27 12:00:00	0.00507995	0.0051188	0.00497314
2094-08-27	0.0051527	0.00513948	0.00498816
2094-09-26 12:00:00	0.00519722	0.0051572	0.00506962
2094-10-27	0.00516687	0.00512032	0.00525932
2094-11-26 12:00:00	0.00513041	0.00530284	0.00533799
2094-12-27 12:00:00	0.00530216	0.00534995	0.00534519
2095-01-26	0.00525369	0.00525311	0.00528882
2095-02-24 12:00:00	0.00524592	0.00524765	0.00523545
2095-03-27	0.00524657	0.00525377	0.00523557
2095-04-26 12:00:00	0.00523971	0.00517903	0.0052113
2095-05-27	0.00515423	0.00518288	0.00520456
2095-06-26 12:00:00	0.00509489	0.00515723	0.00520348
2095-07-27 12:00:00	0.00505322	0.00520709	0.00525045
2095-08-27	0.00507642	0.00507742	0.00500463
2095-09-26 12:00:00	0.0050685	0.00512773	0.00508832
2095-10-27	0.00510388	0.00517424	0.0051794
2095-11-26 12:00:00	0.00527536	0.00525865	0.0052883
2095-12-27 12:00:00	0.00520947	0.00516163	0.00532029
2096-01-26	0.00531884	0.00529102	0.00531337
2096-02-24 12:00:00	0.00529316	0.00532853	0.00533442
2096-03-26	0.00525405	0.00523393	0.00520884
2096-04-25 12:00:00	0.005237	0.00523817	0.00526236
2096-05-26	0.00519891	0.00513163	0.00516391
2096-06-25 12:00:00	0.00492581	0.00512594	0.00512123
2096-07-26 12:00:00	0.00498655	0.00515093	0.00509639
2096-08-26	0.00526555	0.00518809	0.00518495
2096-09-25 12:00:00	0.00520641	0.00513921	0.00511445
2096-10-26	0.00530164	0.00521883	0.00527114
2096-11-25 12:00:00	0.00527612	0.00528574	0.00532215
2096-12-26 12:00:00	0.00534301	0.00535571	0.00536586
2097-01-25	0.00535715	0.00534991	0.00532287
2097-02-23 12:00:00	0.0053296	0.00532812	0.00533694
2097-03-26	0.00529667	0.00522163	0.0052328
2097-04-25 12:00:00	0.00512556	0.00522859	0.0052416
2097-05-26	0.0051981	0.00522562	0.00521938
2097-06-25 12:00:00	0.00504205	0.00520402	0.00524654
2097-07-26 12:00:00	0.0050852	0.00514949	0.00512521
2097-08-26	0.00527204	0.00524984	0.00522272
2097-09-25 12:00:00	0.00531616	0.00530958	0.00528133
2097-10-26	0.00521484	0.00522485	0.00517097
2097-11-25 12:00:00	0.00521962	0.00532504	0.00535704
2097-12-26 12:00:00	0.00529036	0.00537311	0.00539658
2098-01-25	0.00529644	0.00534038	0.0053098
2098-02-23 12:00:00	0.00528684	0.00530569	0.00531756
2098-03-26	0.00514047	0.0052647	0.0052635
2098-04-25 12:00:00	0.00502281	0.00520543	0.00523199
2098-05-26	0.00526888	0.00526125	0.00512029
2098-06-25 12:00:00	0.0052217	0.00530376	0.00531569
2098-07-26 12:00:00	0.00513914	0.0051286	0.00508219
2098-08-26	0.00513234	0.00499572	0.00499005
2098-09-25 12:00:00	0.00520741	0.00527166	0.00527579
2098-10-26	0.0052325	0.00530996	0.00529246
2098-11-25 12:00:00	0.00533282	0.00534069	0.00530772
2098-12-26 12:00:00	0.00525195	0.00532391	0.0053171
2099-01-25	0.0053519	0.00535201	0.00534104
2099-02-23 12:00:00	0.00525143	0.00530984	0.00525122
2099-03-26	0.005219	0.00522934	0.0050065
2099-04-25 12:00:00	0.00512223	0.0051937	0.005272
2099-05-26	0.0051975	0.00512355	0.00513419
2099-06-25 12:00:00	0.00515325	0.00520358	0.00518206
2099-07-26 12:00:00	0.00469928	0.00508325	0.00513402
2099-08-26	0.00510472	0.00504245	0.00511994
2099-09-25 12:00:00	0.00533103	0.00532746	0.00534269
2099-10-26	0.00519436	0.00518645	0.00523239
2099-11-25 12:00:00	0.00525171	0.00536108	0.00532618

## Sheet: Table SF6
Time	East Coast	Pearl River Delta	West Coast
2015-01-16	0.000382284	0.000388701	0.000392271
2015-02-15	0.000382475	0.000378215	0.000378827
2015-03-16	0.000382507	0.000369433	0.000374923
2015-04-16	0.000374127	0.000376085	0.000383942
2015-05-16	0.000384868	0.000385414	0.000398204
2015-06-16	0.000390163	0.000381274	0.000380754
2015-07-16	0.000452584	0.000378018	0.000386035
2015-08-16	0.000432672	0.000418956	0.000427311
2015-09-16	0.000425617	0.000397185	0.000407326
2015-10-16	0.000383915	0.000404549	0.000411945
2015-11-16	0.000414342	0.000397384	0.000403578
2015-12-16	0.000403513	0.000386881	0.000390853
2016-01-16	0.000396511	0.000381175	0.000377573
2016-02-15	0.000374018	0.000378671	0.000374062
2016-03-15	0.000372159	0.000372233	0.000373426
2016-04-15	0.000389862	0.000392835	0.000389958
2016-05-15	0.000383117	0.000380264	0.000382935
2016-06-15	0.000373116	0.000375216	0.00037319
2016-07-15	0.000376581	0.000378632	0.000389152
2016-08-15	0.00044179	0.000401747	0.000405459
2016-09-15	0.000380153	0.000389506	0.000392952
2016-10-15	0.000413508	0.000418878	0.000395252
2016-11-15	0.000411503	0.00038817	0.000397257
2016-12-15	0.000384003	0.000379832	0.000381826
2017-01-15	0.000401028	0.00038649	0.000386166
2017-02-14	0.000391956	0.000385788	0.000391175
2017-03-15	0.000391181	0.000392082	0.000389319
2017-04-15	0.00038561	0.000390994	0.00039482
2017-05-15	0.000408773	0.000385397	0.00039357
2017-06-15	0.000404054	0.000379425	0.000382928
2017-07-15	0.000421394	0.00042206	0.000408222
2017-08-15	0.00040335	0.000384343	0.000406418
2017-09-15	0.000394796	0.000395652	0.000408319
2017-10-15	0.000375329	0.000381685	0.00038552
2017-11-15	0.000403319	0.000410297	0.000396224
2017-12-15	0.000413763	0.000390217	0.000387862
2018-01-15	0.000382532	0.000381222	0.00038337
2018-02-14	0.000383266	0.000385406	0.000390981
2018-03-15	0.000387079	0.000382724	0.000389836
2018-04-15	0.000379838	0.000372112	0.000379483
2018-05-15	0.000395264	0.000387859	0.000395668
2018-06-15	0.000428864	0.000411021	0.000401525
2018-07-15	0.000411855	0.000406489	0.000414447
2018-08-15	0.000444952	0.000414504	0.000408926
2018-09-15	0.000421629	0.000391625	0.000399535
2018-10-15	0.000384567	0.000389209	0.000382594
2018-11-15	0.000407474	0.000410889	0.00040523
2018-12-15	0.000439239	0.000429084	0.000417987
2019-01-15	0.000417975	0.000459457	0.000421042
2019-02-14	0.00039877	0.000385636	0.000386053
2019-03-15	0.000387828	0.000383548	0.000387557
2019-04-15	0.000383069	0.000384062	0.000409015
2019-05-15	0.00039837	0.000391577	0.000402075
2019-06-15	0.000413811	0.000404824	0.000436449
2019-07-15	0.000410047	0.000400418	0.000418436
2019-08-15	0.000441383	0.000392988	0.000421232
2019-09-15	0.00040665	0.000402996	0.000424601
2019-10-15	0.000395971	0.000408834	0.000413599
2019-11-15	0.000430647	0.000413271	0.000412505
2019-12-15	0.000421827	0.000406671	0.000409295
2020-01-15	0.000386307	0.000387436	0.000384164
2020-02-14	0.000391995	0.00038949	0.000388297
2020-03-14	0.000396036	0.000394946	0.000398445
2020-04-14	0.000403336	0.000398681	0.000403035
2020-05-14	0.000411764	0.000390464	0.000408917
2020-06-14	0.000390101	0.000384564	0.000392682
2020-07-14	0.000421764	0.000408694	0.000404676
2020-08-14	0.000403864	0.0004066	0.000402441
2020-09-14	0.000404006	0.000404859	0.000398077
2020-10-14	0.000397681	0.000406173	0.000403208
2020-11-14	0.000409006	0.000399647	0.000395568
2020-12-14	0.000416965	0.000396915	0.000392013
2021-01-14	0.00039079	0.00039144	0.000393598
2021-02-13	0.000384042	0.000381754	0.000385024
2021-03-14	0.000385312	0.000386185	0.000388657
2021-04-14	0.000393192	0.000394011	0.000399455
2021-05-14	0.000392068	0.00039048	0.000396372
2021-06-14	0.000385074	0.000386112	0.000392636
2021-07-14	0.000428982	0.000405896	0.000417247
2021-08-14	0.00042922	0.000397165	0.000401427
2021-09-14	0.000396895	0.000414723	0.000397915
2021-10-14	0.000408718	0.000396701	0.000405575
2021-11-14	0.000468346	0.000455378	0.000411647
2021-12-14	0.000442937	0.000403505	0.000403804
2022-01-14	0.000419255	0.000430667	0.000409868
2022-02-13	0.000389963	0.000389884	0.000390999
2022-03-14	0.000408016	0.000397605	0.00039913
2022-04-14	0.000402261	0.000394429	0.000392918
2022-05-14	0.00039506	0.000391855	0.000395215
2022-06-14	0.000401857	0.00038705	0.00039166
2022-07-14	0.00042973	0.000428241	0.000425514
2022-08-14	0.000416046	0.000410366	0.000422041
2022-09-14	0.000410005	0.000434199	0.000417171
2022-10-14	0.000410806	0.000452626	0.000470594
2022-11-14	0.000414765	0.000416788	0.000418001
2022-12-14	0.000421821	0.000412622	0.000413915
2023-01-14	0.000398306	0.00038992	0.00038939
2023-02-13	0.00041476	0.000404383	0.000406329
2023-03-14	0.000407324	0.000404609	0.000409618
2023-04-14	0.000403311	0.000396358	0.000405904
2023-05-14	0.000417358	0.000405619	0.000412931
2023-06-14	0.000424914	0.000400724	0.00040062
2023-07-14	0.000439415	0.000420721	0.000419215
2023-08-14	0.000422685	0.000423574	0.000429935
2023-09-14	0.000427623	0.000434155	0.000418693
2023-10-14	0.000431467	0.000416832	0.00041177
2023-11-14	0.000479106	0.000460061	0.000427868
2023-12-14	0.000401843	0.000406986	0.000413467
2024-01-14	0.000409374	0.000404504	0.000409722
2024-02-13	0.000399826	0.000400224	0.000400419
2024-03-13	0.000404735	0.000396435	0.000399128
2024-04-13	0.000424979	0.000409911	0.000410588
2024-05-13	0.000412849	0.000399311	0.000402785
2024-06-13	0.000416899	0.000425757	0.000433738
2024-07-13	0.000409787	0.000400141	0.000430176
2024-08-13	0.000448422	0.000423537	0.000432612
2024-09-13	0.00042432	0.000412446	0.00040666
2024-10-13	0.000460481	0.000418123	0.000420357
2024-11-13	0.000418347	0.000414217	0.000415476
2024-12-13	0.000416592	0.000407206	0.00040857
2025-01-13	0.000402801	0.000404416	0.000406789
2025-02-12	0.000403032	0.000402026	0.000399813
2025-03-13	0.000408409	0.00040531	0.000407325
2025-04-13	0.000419534	0.000413936	0.000415581
2025-05-13	0.0004064	0.00040241	0.000403304
2025-06-13	0.000424725	0.000415014	0.000450619
2025-07-13	0.000424489	0.000441097	0.000440414
2025-08-13	0.000418456	0.000413113	0.000426774
2025-09-13	0.000421927	0.000425591	0.000418603
2025-10-13	0.00042013	0.000416877	0.000406554
2025-11-13	0.000439063	0.000435974	0.000420099
2025-12-13	0.000425365	0.000431099	0.000429226
2026-01-13	0.000436425	0.000426154	0.000423424
2026-02-12	0.000420457	0.000408872	0.000408866
2026-03-13	0.00042555	0.00042109	0.00043401
2026-04-13	0.000424935	0.000413466	0.000419129
2026-05-13	0.000474598	0.000411823	0.000415925
2026-06-13	0.000425024	0.000430343	0.000431037
2026-07-13	0.000412831	0.000409472	0.000412156
2026-08-13	0.000507717	0.000437904	0.000422945
2026-09-13	0.000465113	0.000433901	0.000453026
2026-10-13	0.00041936	0.000406509	0.000412092
2026-11-13	0.000425046	0.00041061	0.000417787
2026-12-13	0.000456829	0.000447195	0.000427656
2027-01-13	0.000427482	0.000423291	0.000413307
2027-02-12	0.000418505	0.000408326	0.00040917
2027-03-13	0.000407674	0.000405837	0.000413313
2027-04-13	0.000416432	0.000406752	0.000419127
2027-05-13	0.000412486	0.000406992	0.000415059
2027-06-13	0.00043072	0.000410873	0.000407579
2027-07-13	0.000459277	0.000439186	0.000431894
2027-08-13	0.000431027	0.000453442	0.000476733
2027-09-13	0.000426137	0.000453834	0.000464703
2027-10-13	0.000414013	0.000408616	0.000407023
2027-11-13	0.000432242	0.000422774	0.000432678
2027-12-13	0.000440956	0.000455078	0.000428133
2028-01-13	0.000418349	0.000411194	0.000412845
2028-02-12	0.000445475	0.000433875	0.000436246
2028-03-12	0.00041688	0.000421849	0.00042061
2028-04-12	0.000429976	0.000425429	0.000422224
2028-05-12	0.000422038	0.000410929	0.000413136
2028-06-12	0.000416867	0.000420673	0.000418948
2028-07-12	0.000421729	0.000420064	0.000423439
2028-08-12	0.000425643	0.000423263	0.00043234
2028-09-12	0.000418568	0.00042706	0.000429241
2028-10-12	0.000416471	0.000420907	0.000435828
2028-11-12	0.000458146	0.000432796	0.000437415
2028-12-12	0.000430058	0.000424749	0.000424535
2029-01-12	0.000423902	0.000422922	0.000426387
2029-02-11	0.00042111	0.000413887	0.000415219
2029-03-12	0.000432796	0.000426861	0.000428797
2029-04-12	0.000426715	0.000414372	0.000421498
2029-05-12	0.000415401	0.000420039	0.000427562
2029-06-12	0.000418165	0.000409738	0.000416301
2029-07-12	0.000415568	0.000424582	0.000425656
2029-08-12	0.000436991	0.000467113	0.000468119
2029-09-12	0.000443029	0.000465873	0.000482344
2029-10-12	0.000457489	0.000452028	0.000460663
2029-11-12	0.000449007	0.00050644	0.000483386
2029-12-12	0.000450121	0.000440196	0.000428122
2030-01-12	0.000448569	0.000430769	0.000436189
2030-02-11	0.000421431	0.000426928	0.000422424
2030-03-12	0.000426232	0.000422405	0.000422719
2030-04-12	0.000423968	0.000427413	0.000427799
2030-05-12	0.000447766	0.00045227	0.000458712
2030-06-12	0.00045051	0.000427762	0.000428796
2030-07-12	0.000454261	0.000446457	0.000472115
2030-08-12	0.000458457	0.000436925	0.00043628
2030-09-12	0.000430042	0.00041029	0.000434316
2030-10-12	0.000502969	0.000488905	0.000439298
2030-11-12	0.000475281	0.00044252	0.000443821
2030-12-12	0.000458164	0.000439044	0.000444082
2031-01-12	0.000462294	0.000473241	0.000452113
2031-02-11	0.000424522	0.000424128	0.000425411
2031-03-12	0.000422625	0.000419616	0.000421423
2031-04-12	0.000439386	0.000430006	0.000437799
2031-05-12	0.000421993	0.000433226	0.000430806
2031-06-12	0.000443942	0.000441039	0.00045329
2031-07-12	0.000461172	0.000440218	0.000434758
2031-08-12	0.000448202	0.000438031	0.000462051
2031-09-12	0.000456138	0.000451573	0.000472442
2031-10-12	0.000435242	0.000432266	0.000431452
2031-11-12	0.000431113	0.000437717	0.000437008
2031-12-12	0.000457813	0.000452705	0.000447804
2032-01-12	0.000425441	0.000436508	0.000437884
2032-02-11	0.000432576	0.000434646	0.000434611
2032-03-11	0.000428334	0.000425206	0.000428744
2032-04-11	0.000427853	0.00042573	0.00043536
2032-05-11	0.000458814	0.000434421	0.000440955
2032-06-11	0.000437125	0.000433972	0.000457717
2032-07-11	0.000453776	0.000461918	0.000454363
2032-08-11	0.000445096	0.00044737	0.000450521
2032-09-11	0.000450735	0.000459057	0.000450655
2032-10-11	0.00046718	0.00045298	0.000456943
2032-11-11	0.000448356	0.000447521	0.00044781
2032-12-11	0.000455031	0.000443465	0.000430645
2033-01-11	0.000431255	0.000431983	0.000432259
2033-02-10	0.000503771	0.000436305	0.00043495
2033-03-11	0.000434467	0.000433029	0.000429348
2033-04-11	0.000450048	0.000434032	0.000437656
2033-05-11	0.000433487	0.000426147	0.0004328
2033-06-11	0.000441161	0.000440675	0.000440572
2033-07-11	0.000460391	0.000431457	0.000432966
2033-08-11	0.000445491	0.000436599	0.000455494
2033-09-11	0.000449819	0.000442059	0.0004398
2033-10-11	0.000438339	0.000438417	0.000449704
2033-11-11	0.000465833	0.000450634	0.000457627
2033-12-11	0.000457195	0.000439474	0.000446325
2034-01-11	0.000454084	0.000439462	0.000443111
2034-02-10	0.000451964	0.000442293	0.000479187
2034-03-11	0.00044537	0.000440122	0.000440505
2034-04-11	0.000437704	0.000433828	0.000440496
2034-05-11	0.000438914	0.00044406	0.000446597
2034-06-11	0.000493588	0.0004626	0.000452676
2034-07-11	0.000520961	0.000455352	0.000445621
2034-08-11	0.000492785	0.000455812	0.000453544
2034-09-11	0.000449958	0.000464389	0.000459009
2034-10-11	0.00043078	0.000433239	0.00043863
2034-11-11	0.00044511	0.000447791	0.000462872
2034-12-11	0.000453952	0.000448085	0.000456948
2035-01-11	0.000433344	0.000435043	0.000435641
2035-02-10	0.000430465	0.000435851	0.000432615
2035-03-11	0.000438668	0.000431211	0.000433668
2035-04-11	0.00044915	0.000440049	0.000446564
2035-05-11	0.000510851	0.000434526	0.000444818
2035-06-11	0.000452891	0.000444448	0.000472521
2035-07-11	0.000457773	0.000468386	0.000464827
2035-08-11	0.0004713	0.000452123	0.000459271
2035-09-11	0.000441302	0.000484378	0.000488964
2035-10-11	0.000457344	0.000450828	0.000440874
2035-11-11	0.000475104	0.000449968	0.000445675
2035-12-11	0.000465939	0.000456965	0.000457673
2036-01-11	0.000442808	0.000453861	0.00046431
2036-02-10	0.000443413	0.000441226	0.000442985
2036-03-10	0.000442017	0.0004379	0.000438877
2036-04-10	0.000455544	0.000440725	0.000439938
2036-05-10	0.000477982	0.00044409	0.000455256
2036-06-10	0.000487273	0.000468457	0.000469716
2036-07-10	0.000449993	0.000446886	0.00046236
2036-08-10	0.000442569	0.000454171	0.000462289
2036-09-10	0.000501474	0.000464547	0.000456148
2036-10-10	0.000445006	0.000483974	0.000491663
2036-11-10	0.000484138	0.000465522	0.000462775
2036-12-10	0.00047234	0.000476779	0.000468205
2037-01-10	0.000440955	0.000438967	0.00043761
2037-02-09	0.000443744	0.000446124	0.00044715
2037-03-10	0.000462939	0.000446688	0.000448789
2037-04-10	0.000448793	0.000449943	0.000452888
2037-05-10	0.000452009	0.000455471	0.000458211
2037-06-10	0.000446716	0.000446226	0.00046183
2037-07-10	0.000460063	0.000483462	0.000501962
2037-08-10	0.000466944	0.000464778	0.000480636
2037-09-10	0.000494336	0.000474229	0.000469834
2037-10-10	0.000448714	0.000449931	0.000449757
2037-11-10	0.000455001	0.000462854	0.000457355
2037-12-10	0.000455612	0.000457424	0.000451188
2038-01-10	0.000449689	0.000445596	0.000444694
2038-02-09	0.000452373	0.000449774	0.000457657
2038-03-10	0.000457	0.000453148	0.00045053
2038-04-10	0.000452284	0.000471858	0.000455923
2038-05-10	0.000454818	0.000456249	0.000454889
2038-06-10	0.000487677	0.000448091	0.000449212
2038-07-10	0.000512059	0.000459668	0.000464451
2038-08-10	0.000493898	0.000522837	0.000508542
2038-09-10	0.000470979	0.000469438	0.000454354
2038-10-10	0.000499059	0.000479232	0.000472953
2038-11-10	0.000478713	0.000459464	0.000455111
2038-12-10	0.000474261	0.000459076	0.000448742
2039-01-10	0.000456387	0.000451877	0.00045467
2039-02-09	0.000453186	0.000448285	0.000452022
2039-03-10	0.000451307	0.000450159	0.000455251
2039-04-10	0.000455465	0.000446048	0.000458804
2039-05-10	0.00047056	0.00045462	0.000462583
2039-06-10	0.000464602	0.000452195	0.000457437
2039-07-10	0.000512693	0.000491625	0.000486675
2039-08-10	0.000478303	0.000470277	0.000460989
2039-09-10	0.00052982	0.000498111	0.000470885
2039-10-10	0.000516755	0.000497345	0.000478864
2039-11-10	0.000481863	0.000483532	0.000473983
2039-12-10	0.000486309	0.000459939	0.000466058
2040-01-10	0.000451122	0.00045109	0.000455132
2040-02-09	0.000461863	0.000457745	0.000459502
2040-03-09	0.000460846	0.000456385	0.000468958
2040-04-09	0.000471349	0.000466962	0.000468102
2040-05-09	0.00045268	0.000447784	0.000463296
2040-06-09	0.000512235	0.000470972	0.000480053
2040-07-09	0.000538871	0.000500532	0.000476455
2040-08-09	0.000485115	0.000460364	0.000459252
2040-09-09	0.000453536	0.000476852	0.000464564
2040-10-09	0.000475078	0.00047522	0.000465304
2040-11-09	0.000470885	0.00048845	0.000484373
2040-12-09	0.000485252	0.000480438	0.000478415
2041-01-09	0.000482353	0.000492422	0.000479911
2041-02-08	0.000458411	0.000456045	0.000461239
2041-03-09	0.000479587	0.000466524	0.000466213
2041-04-09	0.000467588	0.000457381	0.000460495
2041-05-09	0.000490068	0.000462294	0.000472105
2041-06-09	0.000462499	0.000475911	0.000476699
2041-07-09	0.000481379	0.000478945	0.000470763
2041-08-09	0.000480382	0.000470038	0.000468923
2041-09-09	0.000470287	0.000467435	0.000468365
2041-10-09	0.000544719	0.000504512	0.000505117
2041-11-09	0.000477456	0.000484611	0.000475796
2041-12-09	0.000473015	0.00047303	0.000463186
2042-01-09	0.000463729	0.000458437	0.000466669
2042-02-08	0.00046802	0.000480743	0.000475032
2042-03-09	0.000462779	0.000467535	0.00047969
2042-04-09	0.000468344	0.00046533	0.000464612
2042-05-09	0.000493515	0.000470815	0.000470204
2042-06-09	0.000458328	0.000460707	0.000473758
2042-07-09	0.000457896	0.000480495	0.000492094
2042-08-09	0.000483006	0.0004714	0.000476342
2042-09-09	0.000493891	0.000531088	0.000549532
2042-10-09	0.000482228	0.000460151	0.00046582
2042-11-09	0.000501962	0.000469694	0.000469523
2042-12-09	0.00050121	0.000503879	0.000499241
2043-01-09	0.000492036	0.000468655	0.000471102
2043-02-08	0.000460958	0.00046182	0.000463609
2043-03-09	0.000472631	0.000466346	0.000465246
2043-04-09	0.000483049	0.000461293	0.000477081
2043-05-09	0.000464034	0.000467944	0.000465667
2043-06-09	0.000490454	0.000482167	0.00047743
2043-07-09	0.000485642	0.000536782	0.00050816
2043-08-09	0.000471683	0.000473256	0.000488924
2043-09-09	0.000515331	0.000478752	0.000495825
2043-10-09	0.000517551	0.000499914	0.000474491
2043-11-09	0.000505496	0.000489205	0.0004877
2043-12-09	0.000492103	0.000477786	0.000484697
2044-01-09	0.000477918	0.000462203	0.000470509
2044-02-08	0.000479455	0.00047056	0.000474313
2044-03-08	0.000494415	0.000477976	0.000489775
2044-04-08	0.000476508	0.000478469	0.000488786
2044-05-08	0.000467436	0.000469603	0.000474421
2044-06-08	0.000487013	0.000473033	0.000476443
2044-07-08	0.000511251	0.00048615	0.000507583
2044-08-08	0.00049377	0.000509792	0.000522226
2044-09-08	0.000508616	0.000503001	0.000484989
2044-10-08	0.000465098	0.000469757	0.000475753
2044-11-08	0.000483386	0.000479819	0.000481306
2044-12-08	0.000495726	0.000494552	0.000495113
2045-01-08	0.000503206	0.000497374	0.00049685
2045-02-07	0.000491782	0.000483184	0.000479366
2045-03-08	0.000467781	0.000465115	0.000466633
2045-04-08	0.000467792	0.000464784	0.000472833
2045-05-08	0.000497505	0.000497828	0.000494224
2045-06-08	0.000503729	0.000494279	0.000496651
2045-07-08	0.000576278	0.000500901	0.000509549
2045-08-08	0.000514215	0.000489877	0.000488821
2045-09-08	0.000492523	0.000533103	0.000499173
2045-10-08	0.000476316	0.000474536	0.000476583
2045-11-08	0.000504023	0.000478109	0.000475619
2045-12-08	0.000470115	0.000470948	0.000470851
2046-01-08	0.000482386	0.000478854	0.000481041
2046-02-07	0.000482999	0.000481945	0.000481755
2046-03-08	0.000492478	0.00047887	0.000476602
2046-04-08	0.000481463	0.000481221	0.000482017
2046-05-08	0.000485108	0.000491042	0.000495963
2046-06-08	0.000478057	0.000475496	0.000477839
2046-07-08	0.000499795	0.000494737	0.00048804
2046-08-08	0.000494296	0.00048559	0.00049704
2046-09-08	0.000483528	0.000492413	0.000489768
2046-10-08	0.000506398	0.000497809	0.000480852
2046-11-08	0.000526405	0.000493867	0.000492985
2046-12-08	0.00053225	0.000504657	0.000508486
2047-01-08	0.000481732	0.000475075	0.000477792
2047-02-07	0.000484206	0.000485272	0.000477581
2047-03-08	0.000484197	0.000481165	0.000479244
2047-04-08	0.000486964	0.00048384	0.000485412
2047-05-08	0.000504087	0.0004816	0.000490261
2047-06-08	0.000484792	0.000485655	0.000483783
2047-07-08	0.000516043	0.000494767	0.000517205
2047-08-08	0.000508304	0.000509359	0.000531181
2047-09-08	0.000484515	0.000497603	0.000528147
2047-10-08	0.000513272	0.000516103	0.000518766
2047-11-08	0.000526576	0.000505995	0.000502775
2047-12-08	0.000498598	0.000513231	0.000482461
2048-01-08	0.000478958	0.000476684	0.000480543
2048-02-07	0.000482644	0.000476089	0.000475519
2048-03-07	0.000495896	0.000487242	0.000491437
2048-04-07	0.000478766	0.000475294	0.000485914
2048-05-07	0.000481453	0.000475438	0.000489356
2048-06-07	0.000491372	0.000476732	0.000484424
2048-07-07	0.000513572	0.000499897	0.000507249
2048-08-07	0.000544926	0.000512744	0.000497925
2048-09-07	0.000488333	0.000499683	0.000486997
2048-10-07	0.000480507	0.000485357	0.000498561
2048-11-07	0.000501182	0.000506323	0.000496488
2048-12-07	0.000500654	0.00049383	0.000496497
2049-01-07	0.000486335	0.000484284	0.000485202
2049-02-06	0.000487883	0.0004767	0.000482335
2049-03-07	0.000488912	0.000485208	0.000491631
2049-04-07	0.000501608	0.000495194	0.00049255
2049-05-07	0.000477075	0.00048011	0.000499044
2049-06-07	0.00051476	0.000505408	0.000495784
2049-07-07	0.000544313	0.00051745	0.000510296
2049-08-07	0.000512678	0.000504948	0.000520992
2049-09-07	0.00051786	0.000496273	0.000493463
2049-10-07	0.000521058	0.000493501	0.000491243
2049-11-07	0.00050991	0.000504341	0.000504806
2049-12-07	0.000504474	0.000496802	0.000494838
2050-01-07	0.000493077	0.000488968	0.000490797
2050-02-06	0.000483732	0.000483084	0.000486751
2050-03-07	0.000494599	0.000487607	0.000493675
2050-04-07	0.000493108	0.00050162	0.000497494
2050-05-07	0.000491706	0.000487132	0.000485801
2050-06-07	0.000513448	0.000484208	0.000492016
2050-07-07	0.000503529	0.000518845	0.000505997
2050-08-07	0.000522933	0.000518768	0.000511403
2050-09-07	0.000519961	0.000497911	0.000496564
2050-10-07	0.000508603	0.00048804	0.000494859
2050-11-07	0.000526712	0.000514151	0.000502689
2050-12-07	0.000517795	0.000493631	0.000493257
2051-01-07 12:00:00	0.00048939	0.000486332	0.00048855
2051-02-06	0.000491806	0.000489972	0.000491319
2051-03-07 12:00:00	0.000502437	0.000507723	0.000497903
2051-04-07	0.000498117	0.000488942	0.000496053
2051-05-07 12:00:00	0.000490794	0.000493925	0.000516217
2051-06-07	0.000521794	0.000507736	0.000531802
2051-07-07 12:00:00	0.000520707	0.000500247	0.000508486
2051-08-07 12:00:00	0.000560715	0.000553759	0.000557328
2051-09-07	0.00052074	0.000504061	0.000510937
2051-10-07 12:00:00	0.000483462	0.000505601	0.000500994
2051-11-07	0.000520302	0.000517823	0.000525743
2051-12-07 12:00:00	0.000499339	0.000493264	0.00049026
2052-01-07 12:00:00	0.000512637	0.000496264	0.000494571
2052-02-06	0.000493982	0.000495334	0.000498367
2052-03-06 12:00:00	0.000490192	0.000490479	0.00049553
2052-04-06	0.000495588	0.000489017	0.000500615
2052-05-06 12:00:00	0.000522641	0.000499478	0.000495748
2052-06-06	0.000523727	0.000492627	0.000502767
2052-07-06 12:00:00	0.000508809	0.000493185	0.000504156
2052-08-06 12:00:00	0.00051142	0.000528677	0.000532418
2052-09-06	0.000513921	0.000512602	0.000515946
2052-10-06 12:00:00	0.00049007	0.000493029	0.000499241
2052-11-06	0.000527493	0.000520805	0.000516284
2052-12-06 12:00:00	0.000508733	0.000515	0.000511246
2053-01-06 12:00:00	0.000506268	0.000499034	0.000502633
2053-02-05	0.000516995	0.000509155	0.000511222
2053-03-06 12:00:00	0.000510021	0.000495458	0.000497606
2053-04-06	0.000521061	0.000503815	0.000505034
2053-05-06 12:00:00	0.000517025	0.000506758	0.000507914
2053-06-06	0.000546027	0.00051316	0.000513477
2053-07-06 12:00:00	0.000510625	0.00051636	0.000495535
2053-08-06 12:00:00	0.000524061	0.000523109	0.0005265
2053-09-06	0.000504015	0.000518461	0.000503372
2053-10-06 12:00:00	0.000514619	0.000519522	0.000543874
2053-11-06	0.000558729	0.000521608	0.000512349
2053-12-06 12:00:00	0.000544497	0.000506457	0.000507212
2054-01-06 12:00:00	0.000506227	0.000501578	0.000505103
2054-02-05	0.00049962	0.00050213	0.000499684
2054-03-06 12:00:00	0.00052569	0.00050726	0.000510149
2054-04-06	0.000507109	0.000507522	0.000515852
2054-05-06 12:00:00	0.000534199	0.000509046	0.000525754
2054-06-06	0.0005256	0.000552426	0.000536062
2054-07-06 12:00:00	0.000556649	0.000515966	0.000518153
2054-08-06 12:00:00	0.000565473	0.000524141	0.000527322
2054-09-06	0.00051333	0.000516349	0.0005177
2054-10-06 12:00:00	0.00053519	0.000544159	0.00054048
2054-11-06	0.000513638	0.000522633	0.000531663
2054-12-06 12:00:00	0.000538065	0.000521596	0.000516103
2055-01-06 12:00:00	0.000528349	0.000522277	0.000519151
2055-02-05	0.000532055	0.000514907	0.000506313
2055-03-06 12:00:00	0.000501263	0.000502826	0.000505163
2055-04-06	0.000524546	0.000516875	0.000524896
2055-05-06 12:00:00	0.000519729	0.000501619	0.000514248
2055-06-06	0.000528461	0.000517629	0.00052952
2055-07-06 12:00:00	0.000542765	0.000532548	0.000539149
2055-08-06 12:00:00	0.000532347	0.000540096	0.000548789
2055-09-06	0.000545556	0.000552673	0.000545189
2055-10-06 12:00:00	0.000501327	0.000509405	0.00051738
2055-11-06	0.000552695	0.000560932	0.000533373
2055-12-06 12:00:00	0.000526267	0.000518248	0.000518208
2056-01-06 12:00:00	0.000512142	0.000508211	0.000511057
2056-02-05	0.000513897	0.000509607	0.000516545
2056-03-05 12:00:00	0.000524924	0.000505351	0.000512849
2056-04-05	0.000510062	0.000507344	0.000513539
2056-05-05 12:00:00	0.000509381	0.000509588	0.000514246
2056-06-05	0.000530304	0.000514912	0.000509
2056-07-05 12:00:00	0.000509726	0.000521185	0.000553301
2056-08-05 12:00:00	0.000521218	0.000528812	0.000534947
2056-09-05	0.000501602	0.000507156	0.000504451
2056-10-05 12:00:00	0.000514659	0.000514089	0.000522285
2056-11-05	0.000541826	0.000522454	0.000532414
2056-12-05 12:00:00	0.000529474	0.000518878	0.000520096
2057-01-05 12:00:00	0.000509437	0.000505392	0.000502785
2057-02-04	0.000516417	0.000513167	0.000507833
2057-03-05 12:00:00	0.000521568	0.000515386	0.000525689
2057-04-05	0.000569549	0.000519551	0.000518607
2057-05-05 12:00:00	0.000576897	0.000522299	0.000540418
2057-06-05	0.000512781	0.000519697	0.000514698
2057-07-05 12:00:00	0.000545865	0.000515796	0.000521548
2057-08-05 12:00:00	0.000543866	0.000537245	0.000551255
2057-09-05	0.000542457	0.000538648	0.000538313
2057-10-05 12:00:00	0.000516265	0.000514475	0.000518762
2057-11-05	0.000523613	0.000538736	0.000539783
2057-12-05 12:00:00	0.000529462	0.00053058	0.000521032
2058-01-05 12:00:00	0.000523738	0.000514583	0.000521001
2058-02-04	0.000523642	0.000522265	0.000523581
2058-03-05 12:00:00	0.000532267	0.000520553	0.000526583
2058-04-05	0.00054065	0.000517642	0.000522602
2058-05-05 12:00:00	0.000545313	0.000534542	0.000536144
2058-06-05	0.000544033	0.000516318	0.00055028
2058-07-05 12:00:00	0.000586526	0.000540126	0.000561782
2058-08-05 12:00:00	0.000513549	0.000511708	0.000543576
2058-09-05	0.000532348	0.00052215	0.000522389
2058-10-05 12:00:00	0.000535399	0.00055672	0.000536087
2058-11-05	0.000534724	0.000524459	0.000523178
2058-12-05 12:00:00	0.00051731	0.00051852	0.000516845
2059-01-05 12:00:00	0.000540547	0.000539773	0.000532728
2059-02-04	0.00052284	0.000518465	0.000526298
2059-03-05 12:00:00	0.000516679	0.000516761	0.00052216
2059-04-05	0.000517378	0.000517655	0.000518497
2059-05-05 12:00:00	0.000522715	0.000524366	0.000527547
2059-06-05	0.000553294	0.000526684	0.000542001
2059-07-05 12:00:00	0.000562859	0.000536875	0.000539589
2059-08-05 12:00:00	0.000568472	0.000540636	0.000538455
2059-09-05	0.00055077	0.000526869	0.000524861
2059-10-05 12:00:00	0.000530558	0.000521437	0.000531486
2059-11-05	0.000539399	0.000533347	0.000533482
2059-12-05 12:00:00	0.00053291	0.000531598	0.00053595
2060-01-05 12:00:00	0.000540552	0.000531775	0.000527825
2060-02-04	0.000521458	0.000518946	0.000524631
2060-03-04 12:00:00	0.000530712	0.000521202	0.000527367
2060-04-04	0.000533191	0.000534848	0.000539128
2060-05-04 12:00:00	0.00052138	0.000520064	0.000533674
2060-06-04	0.000541327	0.000532487	0.000537041
2060-07-04 12:00:00	0.000527027	0.000524861	0.00052953
2060-08-04 12:00:00	0.000535506	0.000553874	0.000565299
2060-09-04	0.000521997	0.000520074	0.000524553
2060-10-04 12:00:00	0.000539764	0.000539471	0.000540291
2060-11-04	0.00058401	0.000545973	0.000544993
2060-12-04 12:00:00	0.000556637	0.000533613	0.00052968
2061-01-04 12:00:00	0.000530269	0.000543982	0.000527463
2061-02-03	0.000526732	0.000527103	0.000528391
2061-03-04 12:00:00	0.000541249	0.000532584	0.000537879
2061-04-04	0.000541986	0.000536503	0.0005468
2061-05-04 12:00:00	0.000542027	0.000543367	0.000531675
2061-06-04	0.000541945	0.000534879	0.000540794
2061-07-04 12:00:00	0.000576604	0.000577579	0.000565218
2061-08-04 12:00:00	0.000575922	0.000546257	0.000543064
2061-09-04	0.000541648	0.00053481	0.000538793
2061-10-04 12:00:00	0.000590586	0.000540455	0.000545046
2061-11-04	0.000557303	0.000546737	0.000539959
2061-12-04 12:00:00	0.000537732	0.000540921	0.00054386
2062-01-04 12:00:00	0.000525903	0.000525986	0.000529962
2062-02-03	0.000542119	0.000532625	0.000538677
2062-03-04 12:00:00	0.000536862	0.000524681	0.000535443
2062-04-04	0.000545209	0.000531903	0.000540188
2062-05-04 12:00:00	0.000546586	0.000531853	0.000542513
2062-06-04	0.000532494	0.000529789	0.000544418
2062-07-04 12:00:00	0.00052307	0.000524939	0.000531847
2062-08-04 12:00:00	0.000578296	0.00057246	0.000576876
2062-09-04	0.000561045	0.000548344	0.000562782
2062-10-04 12:00:00	0.000549344	0.000584359	0.00056074
2062-11-04	0.000542691	0.000537158	0.000554237
2062-12-04 12:00:00	0.000545966	0.000542921	0.000539151
2063-01-04 12:00:00	0.000539574	0.000551936	0.000536258
2063-02-03	0.000524473	0.000524197	0.00052737
2063-03-04 12:00:00	0.000531226	0.000529506	0.000530096
2063-04-04	0.00053916	0.000541781	0.000536759
2063-05-04 12:00:00	0.000544565	0.000533784	0.000549068
2063-06-04	0.000538557	0.000567244	0.000555701
2063-07-04 12:00:00	0.000560981	0.000552976	0.000591714
2063-08-04 12:00:00	0.00055317	0.000559649	0.000602327
2063-09-04	0.000555951	0.000549906	0.000557738
2063-10-04 12:00:00	0.000534781	0.000568224	0.000562561
2063-11-04	0.000578842	0.00057409	0.000589377
2063-12-04 12:00:00	0.000552207	0.00054452	0.000550486
2064-01-04 12:00:00	0.000548951	0.000543681	0.000536526
2064-02-03	0.000539509	0.00053274	0.00053549
2064-03-03 12:00:00	0.000544667	0.000540506	0.000545164
2064-04-03	0.000552102	0.00055028	0.000554421
2064-05-03 12:00:00	0.000555616	0.000538537	0.000546541
2064-06-03	0.000557998	0.000545139	0.000547721
2064-07-03 12:00:00	0.00055691	0.000563206	0.000559486
2064-08-03 12:00:00	0.000570373	0.000621804	0.000600337
2064-09-03	0.000545353	0.000542572	0.000549702
2064-10-03 12:00:00	0.000557383	0.000541471	0.000543348
2064-11-03	0.000576037	0.00056302	0.000566521
2064-12-03 12:00:00	0.00053838	0.000542866	0.000544125
2065-01-03 12:00:00	0.000544638	0.000534994	0.000544501
2065-02-02	0.000534247	0.000532853	0.000538327
2065-03-03 12:00:00	0.000546559	0.000542817	0.000544573
2065-04-03	0.000537965	0.000535506	0.000540769
2065-05-03 12:00:00	0.000544966	0.000535806	0.000535053
2065-06-03	0.000543274	0.000534867	0.000542838
2065-07-03 12:00:00	0.000542989	0.000551816	0.000555439
2065-08-03 12:00:00	0.000539004	0.000539558	0.000556608
2065-09-03	0.000556332	0.000579841	0.000575141
2065-10-03 12:00:00	0.000579756	0.000556923	0.000549458
2065-11-03	0.000563699	0.000543755	0.000550151
2065-12-03 12:00:00	0.000561624	0.00056496	0.000547512
2066-01-03 12:00:00	0.00054449	0.000549766	0.000548535
2066-02-02	0.000542394	0.000537835	0.000550785
2066-03-03 12:00:00	0.000552437	0.000540773	0.000543749
2066-04-03	0.000553418	0.00054532	0.000553217
2066-05-03 12:00:00	0.000572445	0.000555275	0.000551445
2066-06-03	0.000572111	0.000550757	0.000555146
2066-07-03 12:00:00	0.000559522	0.000568618	0.000551749
2066-08-03 12:00:00	0.000592104	0.000595103	0.000565631
2066-09-03	0.00055317	0.000555981	0.000550176
2066-10-03 12:00:00	0.000568228	0.000589981	0.000562774
2066-11-03	0.000562238	0.000548673	0.000545909
2066-12-03 12:00:00	0.000593834	0.00055955	0.000555626
2067-01-03 12:00:00	0.000545659	0.000544221	0.000545674
2067-02-02	0.000544167	0.000539559	0.000545651
2067-03-03 12:00:00	0.000540989	0.000538628	0.00054158
2067-04-03	0.000562721	0.00056087	0.000574441
2067-05-03 12:00:00	0.000568208	0.00054962	0.000554759
2067-06-03	0.000571713	0.000561199	0.000559944
2067-07-03 12:00:00	0.00063208	0.000573333	0.000591966
2067-08-03 12:00:00	0.000565264	0.000558201	0.000557983
2067-09-03	0.000554026	0.000557813	0.000553956
2067-10-03 12:00:00	0.00060596	0.000603169	0.000585925
2067-11-03	0.000575679	0.00057416	0.000563415
2067-12-03 12:00:00	0.000605721	0.000577405	0.000569059
2068-01-03 12:00:00	0.000603111	0.000551433	0.000552217
2068-02-02	0.000545107	0.000542094	0.000539381
2068-03-02 12:00:00	0.000545794	0.000545055	0.000546196
2068-04-02	0.000569231	0.000552063	0.000568622
2068-05-02 12:00:00	0.000593769	0.000563732	0.000583986
2068-06-02	0.000559042	0.000552811	0.000552497
2068-07-02 12:00:00	0.000548443	0.000558101	0.00057452
2068-08-02 12:00:00	0.000619702	0.000602664	0.000586364
2068-09-02	0.000618528	0.00056145	0.000590256
2068-10-02 12:00:00	0.000559244	0.000570639	0.000569263
2068-11-02	0.000562085	0.000550978	0.000560862
2068-12-02 12:00:00	0.000594773	0.000575821	0.000561549
2069-01-02 12:00:00	0.000594357	0.000622715	0.00060113
2069-02-01	0.000560955	0.000552391	0.000556928
2069-03-02 12:00:00	0.000554122	0.000546768	0.00055728
2069-04-02	0.000550447	0.000547106	0.000553582
2069-05-02 12:00:00	0.000557635	0.000558828	0.000557754
2069-06-02	0.00061746	0.000561642	0.000572088
2069-07-02 12:00:00	0.000656033	0.000602715	0.000599532
2069-08-02 12:00:00	0.000589803	0.000561999	0.000576204
2069-09-02	0.000574105	0.000574552	0.000593866
2069-10-02 12:00:00	0.00060266	0.000577561	0.000584874
2069-11-02	0.00056702	0.000557748	0.00055923
2069-12-02 12:00:00	0.000575784	0.000558503	0.00055804
2070-01-02 12:00:00	0.000547113	0.000548567	0.000547812
2070-02-01	0.000557305	0.000556567	0.000559735
2070-03-02 12:00:00	0.000557293	0.000554429	0.00055918
2070-04-02	0.000565449	0.000568016	0.000578651
2070-05-02 12:00:00	0.000598419	0.000558055	0.000567358
2070-06-02	0.00068824	0.000585274	0.000596648
2070-07-02 12:00:00	0.000575481	0.000574129	0.000624233
2070-08-02 12:00:00	0.000634355	0.000610837	0.00061631
2070-09-02	0.000586043	0.000565059	0.000567808
2070-10-02 12:00:00	0.000556743	0.000584459	0.000571002
2070-11-02	0.000560948	0.000566847	0.000572551
2070-12-02 12:00:00	0.000569986	0.000562719	0.000555381
2071-01-02 12:00:00	0.000579511	0.00056872	0.000565637
2071-02-01	0.000555847	0.000557987	0.000561422
2071-03-02 12:00:00	0.000554992	0.000551506	0.000554333
2071-04-02	0.000564947	0.000558794	0.000562913
2071-05-02 12:00:00	0.000577441	0.000559446	0.000575779
2071-06-02	0.000583326	0.00056192	0.00057129
2071-07-02 12:00:00	0.000626099	0.000574402	0.00060412
2071-08-02 12:00:00	0.000578526	0.000567707	0.000575742
2071-09-02	0.000559063	0.000571267	0.000574279
2071-10-02 12:00:00	0.000565465	0.000564607	0.000580208
2071-11-02	0.000588129	0.000583961	0.000586654
2071-12-02 12:00:00	0.000602307	0.000577051	0.000574631
2072-01-02 12:00:00	0.000566293	0.000560546	0.000560769
2072-02-01	0.000562787	0.000559269	0.000559238
2072-03-01 12:00:00	0.000561656	0.000558458	0.000569181
2072-04-01	0.000598919	0.000581445	0.000574906
2072-05-01 12:00:00	0.000618759	0.000582414	0.000583572
2072-06-01	0.000560069	0.000558628	0.000571128
2072-07-01 12:00:00	0.000570763	0.000562553	0.000571226
2072-08-01 12:00:00	0.000575491	0.000573687	0.000591539
2072-09-01	0.000592911	0.000604381	0.000616526
2072-10-01 12:00:00	0.000559587	0.000571267	0.000569072
2072-11-01	0.000567628	0.000563927	0.000567022
2072-12-01 12:00:00	0.000568361	0.000571915	0.0005784
2073-01-01 12:00:00	0.00057176	0.000566704	0.000564397
2073-01-31	0.000562001	0.000559819	0.000562294
2073-03-01 12:00:00	0.000601397	0.00057218	0.000567872
2073-04-01	0.000571883	0.000568841	0.000574369
2073-05-01 12:00:00	0.000577563	0.000574665	0.000593589
2073-06-01	0.000596098	0.000571867	0.000572055
2073-07-01 12:00:00	0.000611335	0.000609029	0.00067198
2073-08-01 12:00:00	0.000571698	0.000646731	0.000613548
2073-09-01	0.000600341	0.000580181	0.000592322
2073-10-01 12:00:00	0.000589772	0.000611614	0.000578652
2073-11-01	0.000591474	0.000588488	0.00059476
2073-12-01 12:00:00	0.000576628	0.000567861	0.000566662
2074-01-01 12:00:00	0.000585458	0.000571061	0.000563027
2074-01-31	0.000561553	0.000562421	0.00056592
2074-03-01 12:00:00	0.000578308	0.000573448	0.000573862
2074-04-01	0.000567748	0.00057955	0.000576356
2074-05-01 12:00:00	0.000597325	0.000568449	0.000574835
2074-06-01	0.000665989	0.000589628	0.000626262
2074-07-01 12:00:00	0.00057787	0.000594037	0.000587111
2074-08-01 12:00:00	0.000623833	0.000599866	0.000628099
2074-09-01	0.000571066	0.000565277	0.000585256
2074-10-01 12:00:00	0.000574185	0.000569536	0.000579934
2074-11-01	0.000616778	0.000584	0.000579913
2074-12-01 12:00:00	0.000580098	0.000575031	0.000572214
2075-01-01 12:00:00	0.000569634	0.00056707	0.000565982
2075-01-31	0.000569537	0.000568236	0.000571493
2075-03-01 12:00:00	0.000564774	0.000561662	0.000565544
2075-04-01	0.000573281	0.000570986	0.000577258
2075-05-01 12:00:00	0.000583325	0.00057711	0.000588243
2075-06-01	0.000570743	0.000567966	0.000572906
2075-07-01 12:00:00	0.000627542	0.000588737	0.000579804
2075-08-01 12:00:00	0.000599224	0.000574536	0.000597673
2075-09-01	0.000602091	0.000582129	0.000586609
2075-10-01 12:00:00	0.000585756	0.00056915	0.000579874
2075-11-01	0.000598066	0.000598561	0.000601792
2075-12-01 12:00:00	0.000585294	0.0005748	0.000569099
2076-01-01 12:00:00	0.000582	0.000579903	0.000579803
2076-01-31	0.000575054	0.00057048	0.000568619
2076-02-29 12:00:00	0.000589631	0.000579218	0.000584462
2076-03-31	0.000573778	0.000575753	0.000580016
2076-04-30 12:00:00	0.000600371	0.000574655	0.000587921
2076-05-31	0.000587766	0.000590799	0.000589818
2076-06-30 12:00:00	0.000582573	0.000566724	0.00058294
2076-07-31 12:00:00	0.000606945	0.000601836	0.000616382
2076-08-31	0.000601133	0.000596598	0.000610154
2076-09-30 12:00:00	0.000587556	0.000635351	0.000599691
2076-10-31	0.000576857	0.000572953	0.000577079
2076-11-30 12:00:00	0.000595808	0.000590451	0.000585008
2076-12-31 12:00:00	0.000576143	0.000572706	0.000572038
2077-01-30	0.000576411	0.000578388	0.000569952
2077-02-28 12:00:00	0.000590858	0.000577369	0.000584776
2077-03-31	0.000574783	0.000571006	0.000575137
2077-04-30 12:00:00	0.000574445	0.000574131	0.000586526
2077-05-31	0.000575887	0.000578408	0.000578137
2077-06-30 12:00:00	0.000579481	0.000592853	0.000598605
2077-07-31 12:00:00	0.000588626	0.000584794	0.000588329
2077-08-31	0.000578055	0.000580102	0.000573245
2077-09-30 12:00:00	0.000587517	0.000596488	0.000611875
2077-10-31	0.000586961	0.000603318	0.000592799
2077-11-30 12:00:00	0.000587288	0.00058065	0.000581533
2077-12-31 12:00:00	0.000599448	0.000577804	0.000580292
2078-01-30	0.000585504	0.000589543	0.000582682
2078-02-28 12:00:00	0.000584163	0.000576908	0.000583639
2078-03-31	0.000573889	0.000571929	0.000581608
2078-04-30 12:00:00	0.00059309	0.000577001	0.000586145
2078-05-31	0.000654575	0.000621481	0.000642238
2078-06-30 12:00:00	0.000596272	0.0005883	0.000615096
2078-07-31 12:00:00	0.00065344	0.000635286	0.00065644
2078-08-31	0.000608099	0.000650473	0.000697276
2078-09-30 12:00:00	0.00064455	0.000587609	0.00058905
2078-10-31	0.000600204	0.000586862	0.000594865
2078-11-30 12:00:00	0.000591966	0.000589871	0.000588377
2078-12-31 12:00:00	0.000578058	0.000577248	0.000576181
2079-01-30	0.000579956	0.000579465	0.000581214
2079-02-28 12:00:00	0.00058663	0.000584925	0.000584871
2079-03-31	0.000590491	0.000580774	0.0005899
2079-04-30 12:00:00	0.00065073	0.000600246	0.000612215
2079-05-31	0.000583045	0.000587686	0.000593556
2079-06-30 12:00:00	0.000603835	0.000580569	0.00059459
2079-07-31 12:00:00	0.000635845	0.00061971	0.000615867
2079-08-31	0.000584887	0.000573962	0.000580111
2079-09-30 12:00:00	0.000587194	0.000595185	0.000584548
2079-10-31	0.000614421	0.000608354	0.000598668
2079-11-30 12:00:00	0.000603688	0.00060154	0.000606817
2079-12-31 12:00:00	0.000585064	0.000582011	0.000582472
2080-01-30	0.000602447	0.000602722	0.000586184
2080-02-28 12:00:00	0.000594935	0.000587562	0.000590857
2080-03-30	0.000601119	0.000588792	0.000596437
2080-04-29 12:00:00	0.000600581	0.00058604	0.000602982
2080-05-30	0.000603414	0.00059253	0.000622858
2080-06-29 12:00:00	0.000597837	0.000594094	0.000602057
2080-07-30 12:00:00	0.00062039	0.000625339	0.000623024
2080-08-30	0.000800609	0.000592969	0.000607515
2080-09-29 12:00:00	0.00058491	0.000602596	0.00060041
2080-10-30	0.000614233	0.000594585	0.000584273
2080-11-29 12:00:00	0.00060247	0.000600389	0.000592071
2080-12-30 12:00:00	0.000607187	0.000593432	0.00059037
2081-01-29	0.000584555	0.000586894	0.000587012
2081-02-27 12:00:00	0.000596839	0.000587543	0.000591893
2081-03-30	0.000584992	0.000581352	0.000585643
2081-04-29 12:00:00	0.000584841	0.000583962	0.000590402
2081-05-30	0.000597486	0.000636761	0.000624213
2081-06-29 12:00:00	0.000607298	0.000594381	0.000616443
2081-07-30 12:00:00	0.000631571	0.000620954	0.000607813
2081-08-30	0.000604287	0.0005958	0.000627207
2081-09-29 12:00:00	0.000602484	0.000597485	0.000592268
2081-10-30	0.00067969	0.000665536	0.000619516
2081-11-29 12:00:00	0.000620848	0.000593889	0.000591755
2081-12-30 12:00:00	0.000602249	0.000597427	0.000595916
2082-01-29	0.000598532	0.000601296	0.000595092
2082-02-27 12:00:00	0.000592151	0.000591269	0.000590614
2082-03-30	0.000592769	0.000592724	0.000601847
2082-04-29 12:00:00	0.000596278	0.000582831	0.000596768
2082-05-30	0.000686886	0.00060162	0.000604926
2082-06-29 12:00:00	0.000629212	0.000605969	0.000614409
2082-07-30 12:00:00	0.000599081	0.000620901	0.000616244
2082-08-30	0.000619888	0.000596698	0.000585181
2082-09-29 12:00:00	0.000595705	0.000585149	0.000612429
2082-10-30	0.000612166	0.000592419	0.000599806
2082-11-29 12:00:00	0.000599733	0.000594254	0.000597526
2082-12-30 12:00:00	0.000612509	0.000588524	0.000589793
2083-01-29	0.000602411	0.000586828	0.00059117
2083-02-27 12:00:00	0.000589228	0.000582518	0.00058926
2083-03-30	0.000594911	0.000601264	0.000597257
2083-04-29 12:00:00	0.000600442	0.000589698	0.000599445
2083-05-30	0.000631194	0.00060503	0.000603421
2083-06-29 12:00:00	0.000716332	0.000612815	0.000601157
2083-07-30 12:00:00	0.000623178	0.000627609	0.000619597
2083-08-30	0.000633712	0.000598635	0.000602525
2083-09-29 12:00:00	0.000595982	0.000593194	0.000607076
2083-10-30	0.00063433	0.000599071	0.000623898
2083-11-29 12:00:00	0.00063012	0.000605227	0.000594883
2083-12-30 12:00:00	0.000612023	0.000602205	0.000600242
2084-01-29	0.000598262	0.000591274	0.000600616
2084-02-27 12:00:00	0.000599745	0.000591718	0.00059645
2084-03-29	0.000609166	0.000600676	0.000604115
2084-04-28 12:00:00	0.000603357	0.000623404	0.000619786
2084-05-29	0.000627741	0.000612265	0.000622188
2084-06-28 12:00:00	0.00065311	0.000623425	0.000656092
2084-07-29 12:00:00	0.000595096	0.000596085	0.000608299
2084-08-29	0.000606711	0.000617762	0.000596475
2084-09-28 12:00:00	0.000665546	0.000618632	0.000604351
2084-10-29	0.000610816	0.00061583	0.000601948
2084-11-28 12:00:00	0.000623858	0.000601142	0.000600269
2084-12-29 12:00:00	0.000604514	0.000596134	0.000593439
2085-01-28	0.000600763	0.000600737	0.000596224
2085-02-26 12:00:00	0.000598401	0.000598401	0.000598893
2085-03-29	0.000637358	0.000602772	0.000608452
2085-04-28 12:00:00	0.000595071	0.000593356	0.000606238
2085-05-29	0.000673309	0.000608557	0.000620659
2085-06-28 12:00:00	0.0006163	0.000603432	0.000615847
2085-07-29 12:00:00	0.000618715	0.000623948	0.000656225
2085-08-29	0.000605106	0.000601878	0.000612873
2085-09-28 12:00:00	0.000602758	0.000598342	0.000609865
2085-10-29	0.000607123	0.000616269	0.000607168
2085-11-28 12:00:00	0.000644473	0.000620154	0.000617904
2085-12-29 12:00:00	0.00059631	0.000592562	0.00060529
2086-01-28	0.000594044	0.000591963	0.00060179
2086-02-26 12:00:00	0.000613472	0.000601441	0.000605458
2086-03-29	0.00060706	0.000596089	0.000608157
2086-04-28 12:00:00	0.000634318	0.00061654	0.000613675
2086-05-29	0.000636981	0.000611734	0.000627005
2086-06-28 12:00:00	0.000651511	0.00061352	0.000612766
2086-07-29 12:00:00	0.000606846	0.000605363	0.00060745
2086-08-29	0.000606466	0.000621208	0.000612998
2086-09-28 12:00:00	0.000609654	0.000602402	0.000606541
2086-10-29	0.000597622	0.000604795	0.000600878
2086-11-28 12:00:00	0.000623	0.000613383	0.000611445
2086-12-29 12:00:00	0.000601449	0.000595416	0.000599221
2087-01-28	0.000612304	0.000599512	0.000607547
2087-02-26 12:00:00	0.000592429	0.000594523	0.000595656
2087-03-29	0.000611013	0.000604842	0.000616075
2087-04-28 12:00:00	0.000631647	0.00060747	0.000616198
2087-05-29	0.000591765	0.00059399	0.000599365
2087-06-28 12:00:00	0.000601639	0.000610467	0.000630021
2087-07-29 12:00:00	0.000660855	0.00063344	0.000638229
2087-08-29	0.000594484	0.000602595	0.000604174
2087-09-28 12:00:00	0.000596945	0.000592318	0.000603225
2087-10-29	0.00061853	0.00060839	0.000613255
2087-11-28 12:00:00	0.000629699	0.000601067	0.000597321
2087-12-29 12:00:00	0.000640292	0.000624659	0.000618253
2088-01-28	0.000606029	0.000600431	0.0006018
2088-02-26 12:00:00	0.000612054	0.000598895	0.000607169
2088-03-28	0.000643555	0.000609937	0.000613473
2088-04-27 12:00:00	0.000598712	0.000597727	0.000603459
2088-05-28	0.000609646	0.000601782	0.000617022
2088-06-27 12:00:00	0.000663722	0.000624357	0.000627161
2088-07-28 12:00:00	0.000613847	0.000627256	0.000621845
2088-08-28	0.000594914	0.000597653	0.000597898
2088-09-27 12:00:00	0.000616534	0.000640814	0.000629567
2088-10-28	0.000620116	0.000613062	0.000611214
2088-11-27 12:00:00	0.000600753	0.00059914	0.000597796
2088-12-28 12:00:00	0.000608626	0.000603233	0.000601008
2089-01-27	0.000600354	0.000600198	0.000600335
2089-02-25 12:00:00	0.000615786	0.000607013	0.000616981
2089-03-28	0.000600253	0.000596931	0.00060262
2089-04-27 12:00:00	0.000609104	0.000600544	0.000603826
2089-05-28	0.000605289	0.000606861	0.000625531
2089-06-27 12:00:00	0.000700194	0.000634506	0.000673868
2089-07-28 12:00:00	0.000634463	0.000616482	0.000652348
2089-08-28	0.000622544	0.000606837	0.00061795
2089-09-27 12:00:00	0.000604355	0.000605747	0.000615523
2089-10-28	0.000629984	0.000617418	0.000621703
2089-11-27 12:00:00	0.000629794	0.000618386	0.000617156
2089-12-28 12:00:00	0.000610754	0.000611606	0.000612227
2090-01-27	0.000606437	0.000605863	0.000611731
2090-02-25 12:00:00	0.000624226	0.000624725	0.000616247
2090-03-28	0.000619041	0.000618523	0.000617536
2090-04-27 12:00:00	0.000602485	0.000603837	0.000607879
2090-05-28	0.000650032	0.000625785	0.000620036
2090-06-27 12:00:00	0.000636528	0.000625099	0.000628329
2090-07-28 12:00:00	0.000676678	0.000668433	0.000652429
2090-08-28	0.000624232	0.000603285	0.000605417
2090-09-27 12:00:00	0.000610009	0.000630979	0.00062899
2090-10-28	0.000619045	0.00062192	0.000628225
2090-11-27 12:00:00	0.000648707	0.000628452	0.000606833
2090-12-28 12:00:00	0.000607425	0.000615811	0.000606306
2091-01-27	0.000615577	0.000613693	0.000608412
2091-02-25 12:00:00	0.000607674	0.000603609	0.000613137
2091-03-28	0.000608373	0.000601844	0.000605358
2091-04-27 12:00:00	0.000616603	0.000630391	0.000629652
2091-05-28	0.000628415	0.000617765	0.000614008
2091-06-27 12:00:00	0.000630717	0.000622752	0.000618973
2091-07-28 12:00:00	0.0006367	0.000618096	0.000624256
2091-08-28	0.000631807	0.0006478	0.000683941
2091-09-27 12:00:00	0.000651712	0.000631896	0.000611025
2091-10-28	0.00061953	0.000612167	0.000611552
2091-11-27 12:00:00	0.000656439	0.000635761	0.000630667
2091-12-28 12:00:00	0.000607137	0.000609159	0.000612074
2092-01-27	0.000619182	0.000613182	0.000620759
2092-02-25 12:00:00	0.000605671	0.000605495	0.000607665
2092-03-27	0.000611247	0.000607193	0.000614718
2092-04-26 12:00:00	0.000631219	0.000616595	0.000626931
2092-05-27	0.000625796	0.000612187	0.000614512
2092-06-26 12:00:00	0.000629011	0.000641526	0.000643
2092-07-27 12:00:00	0.000631475	0.000613991	0.00062257
2092-08-27	0.000686161	0.000655818	0.000675509
2092-09-26 12:00:00	0.000651894	0.000619376	0.000627313
2092-10-27	0.000641147	0.000626155	0.000620536
2092-11-26 12:00:00	0.000634826	0.000641292	0.000616357
2092-12-27 12:00:00	0.000634005	0.000626827	0.000623749
2093-01-26	0.00068788	0.000617786	0.00061162
2093-02-24 12:00:00	0.000616404	0.000607312	0.000613912
2093-03-27	0.000614485	0.000616373	0.000620454
2093-04-26 12:00:00	0.000614745	0.000620521	0.000618778
2093-05-27	0.000642521	0.000626473	0.000644827
2093-06-26 12:00:00	0.000667098	0.000656983	0.000676571
2093-07-27 12:00:00	0.000643944	0.000625678	0.000635224
2093-08-27	0.000635997	0.000654917	0.000657102
2093-09-26 12:00:00	0.000615457	0.000615867	0.000616654
2093-10-27	0.000625533	0.000636931	0.000649094
2093-11-26 12:00:00	0.000640141	0.000629396	0.000629353
2093-12-27 12:00:00	0.00061754	0.000615296	0.000607299
2094-01-26	0.000619447	0.000618763	0.000619388
2094-02-24 12:00:00	0.000614294	0.000610144	0.000616393
2094-03-27	0.000614954	0.000612432	0.000619902
2094-04-26 12:00:00	0.000631016	0.000618638	0.000633413
2094-05-27	0.000613158	0.000611184	0.000619944
2094-06-26 12:00:00	0.000679074	0.000691904	0.000673861
2094-07-27 12:00:00	0.000637335	0.000627445	0.000668455
2094-08-27	0.000619099	0.000620392	0.000656684
2094-09-26 12:00:00	0.000625201	0.000634813	0.000663337
2094-10-27	0.000641915	0.000654207	0.000642188
2094-11-26 12:00:00	0.000659972	0.000630251	0.000626402
2094-12-27 12:00:00	0.000615576	0.000608139	0.000611729
2095-01-26	0.000622378	0.000621075	0.000616785
2095-02-24 12:00:00	0.000623653	0.000619775	0.000627597
2095-03-27	0.000617783	0.00061124	0.000624916
2095-04-26 12:00:00	0.000619906	0.000624567	0.000621497
2095-05-27	0.000630688	0.000623453	0.000621825
2095-06-26 12:00:00	0.000643022	0.000631284	0.000629341
2095-07-27 12:00:00	0.000651776	0.000622842	0.000621743
2095-08-27	0.000639147	0.000636694	0.000654975
2095-09-26 12:00:00	0.000656084	0.000642974	0.000650882
2095-10-27	0.000656607	0.000640747	0.000642527
2095-11-26 12:00:00	0.000625639	0.000626397	0.000620751
2095-12-27 12:00:00	0.000640768	0.000649175	0.000618635
2096-01-26	0.000614721	0.000615004	0.000615438
2096-02-24 12:00:00	0.000619779	0.000613016	0.0006148
2096-03-26	0.000621018	0.000623026	0.000632389
2096-04-25 12:00:00	0.000626587	0.000618911	0.000622707
2096-05-26	0.000633801	0.000645558	0.000644794
2096-06-25 12:00:00	0.000686631	0.000645079	0.000651063
2096-07-26 12:00:00	0.00067564	0.000639735	0.000659546
2096-08-26	0.000610951	0.00062797	0.000628778
2096-09-25 12:00:00	0.000630392	0.000642207	0.000647506
2096-10-26	0.000621786	0.000634094	0.000624459
2096-11-25 12:00:00	0.000630187	0.00062608	0.000622831
2096-12-26 12:00:00	0.000614588	0.000613833	0.000613587
2097-01-25	0.000615307	0.000610749	0.000620181
2097-02-23 12:00:00	0.000614389	0.000614019	0.000615461
2097-03-26	0.000616743	0.000631775	0.000632244
2097-04-25 12:00:00	0.000650847	0.000625945	0.000634055
2097-05-26	0.000634046	0.000627066	0.000638443
2097-06-25 12:00:00	0.000665405	0.000634976	0.000633247
2097-07-26 12:00:00	0.000652071	0.000639179	0.000652967
2097-08-26	0.000628769	0.000622172	0.000634216
2097-09-25 12:00:00	0.00061748	0.000615178	0.00062341
2097-10-26	0.000642295	0.000641911	0.000656063
2097-11-25 12:00:00	0.000650254	0.000641116	0.000639405
2097-12-26 12:00:00	0.000631007	0.000615563	0.000617973
2098-01-25	0.000628393	0.000617481	0.000626125
2098-02-23 12:00:00	0.000624731	0.00061885	0.00062192
2098-03-26	0.00065576	0.000625421	0.000630472
2098-04-25 12:00:00	0.000677353	0.000637485	0.000643753
2098-05-26	0.000631707	0.000630808	0.000668013
2098-06-25 12:00:00	0.000635433	0.000618127	0.000619682
2098-07-26 12:00:00	0.00064433	0.0006514	0.000671306
2098-08-26	0.000646234	0.000674365	0.000682026
2098-09-25 12:00:00	0.000638702	0.000625665	0.000628775
2098-10-26	0.000642925	0.000627589	0.000635204
2098-11-25 12:00:00	0.000625342	0.000623925	0.00063369
2098-12-26 12:00:00	0.000641256	0.000626327	0.000629864
2099-01-25	0.000621787	0.000621423	0.000623717
2099-02-23 12:00:00	0.000635754	0.00062251	0.00063891
2099-03-26	0.000638758	0.000634976	0.000686394
2099-04-25 12:00:00	0.000656701	0.000640257	0.000631111
2099-05-26	0.000642192	0.000655521	0.000659527
2099-06-25 12:00:00	0.00064874	0.000640255	0.000652106
2099-07-26 12:00:00	0.000743722	0.000660621	0.000656827
2099-08-26	0.000656339	0.000665969	0.00065042
2099-09-25 12:00:00	0.00061909	0.000617745	0.00061514
2099-10-26	0.000654558	0.000652737	0.000649441
2099-11-25 12:00:00	0.000654647	0.000633852	0.000642781

## Sheet: Table SF7
Time	East Coast	Pearl River Delta	West Coast
2015-01-16	0.00118441	0.00119493	0.00120499
2015-02-15	0.00118259	0.00117318	0.00117518
2015-03-16	0.00118561	0.00116712	0.00116985
2015-04-16	0.00120421	0.0012139	0.00122417
2015-05-16	0.00125605	0.00126273	0.00128232
2015-06-16	0.00129735	0.00128017	0.00127892
2015-07-16	0.00142641	0.00128328	0.00129149
2015-08-16	0.00137983	0.00136223	0.00136904
2015-09-16	0.00136165	0.00131698	0.00132412
2015-10-16	0.00125637	0.00130578	0.00131443
2015-11-16	0.0012914	0.00125419	0.00127117
2015-12-16	0.00124912	0.00121386	0.0012244
2016-01-16	0.00122846	0.00119526	0.00119016
2016-02-15	0.0011799	0.0011891	0.00118038
2016-03-15	0.00118668	0.00118804	0.00118912
2016-04-15	0.00124697	0.00125689	0.0012477
2016-05-15	0.00126328	0.00125209	0.00126275
2016-06-15	0.0012593	0.00126327	0.00126003
2016-07-15	0.00128103	0.0012936	0.00130615
2016-08-15	0.00141362	0.0013368	0.00133971
2016-09-15	0.00127352	0.00130058	0.00129917
2016-10-15	0.0013306	0.00134335	0.00129338
2016-11-15	0.00130586	0.00125974	0.00127757
2016-12-15	0.00123154	0.00122261	0.00122803
2017-01-15	0.00124257	0.00121181	0.00121309
2017-02-14	0.00123123	0.00122044	0.00122969
2017-03-15	0.00123659	0.00123773	0.00123309
2017-04-15	0.00125373	0.00126348	0.00127248
2017-05-15	0.00133069	0.00128589	0.00129993
2017-06-15	0.00133552	0.00129244	0.00129364
2017-07-15	0.00136457	0.00138259	0.00133761
2017-08-15	0.00134311	0.00131665	0.00134928
2017-09-15	0.00131785	0.00133519	0.00134544
2017-10-15	0.00125036	0.00127418	0.00127191
2017-11-15	0.00128786	0.00130924	0.00127354
2017-12-15	0.00127868	0.00122758	0.00122629
2018-01-15	0.00119527	0.00118778	0.00119775
2018-02-14	0.00119487	0.00120043	0.00121111
2018-03-15	0.00121194	0.00120432	0.00121787
2018-04-15	0.00121411	0.00119965	0.00121297
2018-05-15	0.00128789	0.00127036	0.00128857
2018-06-15	0.00138097	0.00134438	0.00132452
2018-07-15	0.00134607	0.00133915	0.00135156
2018-08-15	0.00140194	0.00135162	0.00132955
2018-09-15	0.0013504	0.00130694	0.00130591
2018-10-15	0.00126726	0.0012861	0.001263
2018-11-15	0.00129358	0.00130002	0.00128989
2018-12-15	0.00133547	0.0013106	0.00129219
2019-01-15	0.00127229	0.00135196	0.00127779
2019-02-14	0.00122423	0.00119745	0.00119882
2019-03-15	0.00122325	0.00121782	0.00122222
2019-04-15	0.00124744	0.00124971	0.00130032
2019-05-15	0.00130662	0.0012976	0.00131468
2019-06-15	0.00134667	0.00133407	0.00139241
2019-07-15	0.00134379	0.00132604	0.00136039
2019-08-15	0.00141184	0.00131563	0.00137169
2019-09-15	0.00133204	0.00133508	0.00136879
2019-10-15	0.00129062	0.00132516	0.00132758
2019-11-15	0.0013329	0.00129681	0.00129617
2019-12-15	0.00128711	0.00125124	0.00126298
2020-01-15	0.0011878	0.00118628	0.0011843
2020-02-14	0.0011965	0.00119246	0.00118933
2020-03-14	0.00122514	0.00122872	0.00123051
2020-04-14	0.00127504	0.00127229	0.00127405
2020-05-14	0.00132651	0.00128834	0.00132074
2020-06-14	0.00131075	0.00129908	0.00131624
2020-07-14	0.00136761	0.00135517	0.00133356
2020-08-14	0.00133697	0.00134954	0.00133427
2020-09-14	0.00133534	0.00134821	0.00132324
2020-10-14	0.00131101	0.00134024	0.00132273
2020-11-14	0.00130198	0.0012854	0.00127628
2020-12-14	0.00129313	0.00124887	0.00124315
2021-01-14	0.00120702	0.00120069	0.00121333
2021-02-13	0.00118555	0.00117691	0.0011874
2021-03-14	0.00121282	0.00121729	0.00121927
2021-04-14	0.00126443	0.0012667	0.00127718
2021-05-14	0.001296	0.00128757	0.00130451
2021-06-14	0.00129516	0.00129603	0.00131068
2021-07-14	0.00138345	0.00134867	0.00135979
2021-08-14	0.00139134	0.00133638	0.00133502
2021-09-14	0.00131393	0.00136653	0.00131647
2021-10-14	0.00132586	0.00131211	0.0013195
2021-11-14	0.00142417	0.00140319	0.00130993
2021-12-14	0.00133848	0.00125523	0.0012611
2022-01-14	0.00127386	0.00129056	0.00125458
2022-02-13	0.00122701	0.00122087	0.00122909
2022-03-14	0.00129603	0.00126837	0.00127887
2022-04-14	0.00130949	0.00128973	0.00129083
2022-05-14	0.00131839	0.00130935	0.00131854
2022-06-14	0.00134688	0.00131692	0.00132583
2022-07-14	0.00140658	0.00140796	0.00139774
2022-08-14	0.00137489	0.00136811	0.00138817
2022-09-14	0.00135123	0.00140675	0.00136549
2022-10-14	0.00133954	0.00142319	0.00146265
2022-11-14	0.00131284	0.00131504	0.00132089
2022-12-14	0.00130717	0.0012867	0.00129202
2023-01-14	0.0012359	0.00121449	0.00121807
2023-02-13	0.0012701	0.00125135	0.00125339
2023-03-14	0.00127481	0.00127233	0.00128003
2023-04-14	0.00130384	0.00128252	0.00130819
2023-05-14	0.00135447	0.00132939	0.00134502
2023-06-14	0.00138054	0.00134232	0.00133109
2023-07-14	0.00141542	0.00138229	0.0013735
2023-08-14	0.00138357	0.00139216	0.00139842
2023-09-14	0.00137662	0.00139226	0.0013584
2023-10-14	0.00136273	0.0013353	0.00132296
2023-11-14	0.00145073	0.0014129	0.00134744
2023-12-14	0.00126388	0.00126459	0.00128806
2024-01-14	0.00125046	0.00123125	0.00125148
2024-02-13	0.00122591	0.00122623	0.00122788
2024-03-13	0.00126254	0.00125135	0.00125175
2024-04-13	0.00132812	0.00130491	0.0012987
2024-05-13	0.00134024	0.00131711	0.00131951
2024-06-13	0.00135913	0.0013807	0.00139377
2024-07-13	0.00135157	0.00133499	0.00139317
2024-08-13	0.00143519	0.00138806	0.00140289
2024-09-13	0.00137755	0.00135566	0.00134063
2024-10-13	0.00142863	0.00134295	0.001348
2024-11-13	0.00132015	0.00130997	0.00131515
2024-12-13	0.0012941	0.00127266	0.00127873
2025-01-13	0.00125163	0.00125242	0.00125996
2025-02-12	0.00124704	0.00124235	0.00124096
2025-03-13	0.00125727	0.00125051	0.00125505
2025-04-13	0.00130649	0.00129783	0.00129829
2025-05-13	0.0013121	0.00130219	0.00130554
2025-06-13	0.0013745	0.0013583	0.00142678
2025-07-13	0.00138631	0.00142278	0.00141851
2025-08-13	0.00136615	0.00136531	0.00138314
2025-09-13	0.00137588	0.00139178	0.00136928
2025-10-13	0.00133527	0.00133169	0.00130801
2025-11-13	0.00136291	0.00136403	0.00132487
2025-12-13	0.00132009	0.00133514	0.00132922
2026-01-13	0.00133688	0.00132029	0.00131073
2026-02-12	0.00129476	0.00127515	0.00127097
2026-03-13	0.00130911	0.00130551	0.0013268
2026-04-13	0.00133351	0.00131145	0.0013218
2026-05-13	0.00145712	0.00133558	0.00133771
2026-06-13	0.00138103	0.00140407	0.00139313
2026-07-13	0.0013589	0.00136674	0.00135752
2026-08-13	0.00154947	0.00142224	0.0013769
2026-09-13	0.00146226	0.00140919	0.00143761
2026-10-13	0.00134711	0.00132259	0.00133193
2026-11-13	0.00134612	0.00131513	0.00133189
2026-12-13	0.0013853	0.00135813	0.00132613
2027-01-13	0.00130294	0.00129333	0.00127517
2027-02-12	0.00129576	0.00127746	0.00127674
2027-03-13	0.0012894	0.00128849	0.00130053
2027-04-13	0.00132573	0.00130807	0.00133057
2027-05-13	0.0013477	0.00133488	0.00135287
2027-06-13	0.00140089	0.00136702	0.00135345
2027-07-13	0.00145166	0.00142616	0.00139557
2027-08-13	0.00140383	0.00145506	0.00149702
2027-09-13	0.0013967	0.00145475	0.00147587
2027-10-13	0.00134402	0.00133518	0.00133075
2027-11-13	0.00136436	0.00135181	0.0013668
2027-12-13	0.00135733	0.001382	0.00133167
2028-01-13	0.00128268	0.00126221	0.0012719
2028-02-12	0.00133415	0.00131074	0.0013157
2028-03-12	0.00129803	0.00130321	0.00130574
2028-04-12	0.00135291	0.00133743	0.00133697
2028-05-12	0.00136196	0.00133535	0.00134332
2028-06-12	0.00137124	0.00137897	0.00137515
2028-07-12	0.00138982	0.00139453	0.00139288
2028-08-12	0.00140053	0.00140592	0.00141536
2028-09-12	0.0013754	0.00140145	0.00139716
2028-10-12	0.00135894	0.00137743	0.00139887
2028-11-12	0.00141676	0.00136411	0.00137597
2028-12-12	0.00133304	0.00131922	0.00132217
2029-01-12	0.00129687	0.00128903	0.0013025
2029-02-11	0.0012836	0.00126619	0.00127171
2029-03-12	0.00132875	0.00131129	0.00132008
2029-04-12	0.00135519	0.00132082	0.00134428
2029-05-12	0.00135832	0.00135682	0.00138359
2029-06-12	0.00138079	0.00136212	0.00137669
2029-07-12	0.00138717	0.00140349	0.00140775
2029-08-12	0.00143057	0.00149396	0.001493
2029-09-12	0.00143216	0.00147952	0.00151232
2029-10-12	0.00144742	0.00143712	0.00145417
2029-11-12	0.00140281	0.00151449	0.00147353
2029-12-12	0.00137409	0.00134757	0.00132959
2030-01-12	0.00135746	0.0013174	0.00133253
2030-02-11	0.00129206	0.00130472	0.00129466
2030-03-12	0.00131253	0.00131317	0.00130552
2030-04-12	0.00133259	0.00134697	0.00134057
2030-05-12	0.00141889	0.00142649	0.00144048
2030-06-12	0.0014476	0.00140002	0.0014041
2030-07-12	0.00144953	0.00143704	0.00148545
2030-08-12	0.00146326	0.00142294	0.00141796
2030-09-12	0.00140686	0.00137364	0.00141542
2030-10-12	0.0015391	0.00151827	0.00141081
2030-11-12	0.00144841	0.00137419	0.00138437
2030-12-12	0.00138765	0.00134073	0.00135975
2031-01-12	0.00137954	0.00139645	0.00135957
2031-02-11	0.00129391	0.00128968	0.00129648
2031-03-12	0.00130042	0.001297	0.00129794
2031-04-12	0.00136155	0.00134857	0.00135839
2031-05-12	0.00134932	0.00137987	0.00136773
2031-06-12	0.00141485	0.00141106	0.0014333
2031-07-12	0.00145421	0.00142069	0.00139947
2031-08-12	0.0014411	0.00142126	0.00146935
2031-09-12	0.00144672	0.00144322	0.00147956
2031-10-12	0.00138624	0.00138224	0.00138003
2031-11-12	0.00136348	0.0013754	0.00137541
2031-12-12	0.00138644	0.00136991	0.0013663
2032-01-12	0.00131238	0.00132871	0.00133799
2032-02-11	0.00132029	0.00132519	0.0013244
2032-03-11	0.00131615	0.0013123	0.00131679
2032-04-11	0.00135149	0.00134699	0.0013665
2032-05-11	0.00144376	0.00139662	0.00140794
2032-06-11	0.00141573	0.00141074	0.00145957
2032-07-11	0.00145561	0.00147389	0.00145701
2032-08-11	0.00144091	0.00145407	0.00145244
2032-09-11	0.00144667	0.00147044	0.00144633
2032-10-11	0.00145702	0.00143938	0.00143777
2032-11-11	0.00139663	0.00139843	0.00139635
2032-12-11	0.0013844	0.00135911	0.00133536
2033-01-11	0.00131371	0.00131381	0.0013165
2033-02-10	0.00146428	0.00132881	0.00132494
2033-03-11	0.00135284	0.00134339	0.00134211
2033-04-11	0.00140248	0.00136584	0.00137708
2033-05-11	0.00139611	0.00137973	0.00139513
2033-06-11	0.0014234	0.00142908	0.0014228
2033-07-11	0.00148186	0.00143823	0.00142664
2033-08-11	0.00144431	0.00143635	0.00146435
2033-09-11	0.00144539	0.0014437	0.00142534
2033-10-11	0.00140038	0.00141138	0.00142394
2033-11-11	0.00143159	0.00140584	0.0014158
2033-12-11	0.00140066	0.00136668	0.0013814
2034-01-11	0.00137324	0.00134292	0.00135225
2034-02-10	0.00136064	0.0013379	0.0014154
2034-03-11	0.00136518	0.00135364	0.00135509
2034-04-11	0.00137487	0.00137491	0.00138007
2034-05-11	0.0014119	0.00142287	0.00142765
2034-06-11	0.00153532	0.00147804	0.00145181
2034-07-11	0.00158133	0.00146364	0.0014283
2034-08-11	0.0015237	0.00146553	0.00144489
2034-09-11	0.00144341	0.0014794	0.00146172
2034-10-11	0.00138711	0.0013914	0.0014038
2034-11-11	0.00139902	0.00140656	0.00143605
2034-12-11	0.00138409	0.00137095	0.00139102
2035-01-11	0.00132139	0.00132483	0.00132721
2035-02-10	0.00132165	0.00133207	0.00132635
2035-03-11	0.00134461	0.00133395	0.00133438
2035-04-11	0.00139725	0.00138263	0.00139189
2035-05-11	0.00155091	0.00140041	0.00141659
2035-06-11	0.0014481	0.00144165	0.0014883
2035-07-11	0.00146763	0.00149953	0.00148244
2035-08-11	0.00149823	0.00147233	0.00147444
2035-09-11	0.00142995	0.00152209	0.00152643
2035-10-11	0.00144464	0.00143603	0.00141139
2035-11-11	0.00145076	0.00139966	0.00139182
2035-12-11	0.00140473	0.0013814	0.00138839
2036-01-11	0.00134272	0.00136286	0.00138673
2036-02-10	0.00134007	0.00133869	0.00133998
2036-03-10	0.00134836	0.00134403	0.00134205
2036-04-10	0.00141419	0.00138533	0.00138246
2036-05-10	0.00149042	0.00142662	0.00144373
2036-06-10	0.00150841	0.00148567	0.00147249
2036-07-10	0.00145044	0.00145387	0.00147426
2036-08-10	0.00144206	0.00147322	0.00148128
2036-09-10	0.00156358	0.00149574	0.00147089
2036-10-10	0.00141747	0.00150185	0.001513
2036-11-10	0.00147468	0.00144089	0.00143391
2036-12-10	0.00142582	0.00143608	0.0014178
2037-01-10	0.00134315	0.00133787	0.00133691
2037-02-09	0.00134057	0.00134673	0.0013481
2037-03-10	0.00140244	0.00137116	0.00137499
2037-04-10	0.00140996	0.00141133	0.00141839
2037-05-10	0.00144121	0.00144354	0.001454
2037-06-10	0.00143732	0.00144496	0.00146858
2037-07-10	0.00147242	0.0015268	0.00155743
2037-08-10	0.00149852	0.00149411	0.00152623
2037-09-10	0.0015413	0.00150619	0.00149118
2037-10-10	0.00142784	0.00143529	0.00143033
2037-11-10	0.00142393	0.00144416	0.00142966
2037-12-10	0.00139969	0.00140644	0.00139161
2038-01-10	0.00136344	0.00135375	0.00135371
2038-02-09	0.00136394	0.0013587	0.0013753
2038-03-10	0.00139885	0.00138977	0.00138564
2038-04-10	0.00141567	0.00144938	0.00142271
2038-05-10	0.00145042	0.00145181	0.00145044
2038-06-10	0.00153442	0.00145468	0.00145604
2038-07-10	0.0015772	0.00148936	0.00148006
2038-08-10	0.00154879	0.00160695	0.00157818
2038-09-10	0.00149437	0.00150211	0.00146195
2038-10-10	0.0015239	0.00148315	0.00147118
2038-11-10	0.00145966	0.00141621	0.00141189
2038-12-10	0.00143094	0.00139455	0.00137908
2039-01-10	0.00137541	0.00136431	0.0013722
2039-02-09	0.00136846	0.00135976	0.00136634
2039-03-10	0.00137652	0.00138072	0.00138445
2039-04-10	0.00141072	0.00139533	0.00141769
2039-05-10	0.00146675	0.00143769	0.00145062
2039-06-10	0.0014833	0.00146134	0.00146942
2039-07-10	0.00158347	0.00154538	0.0015306
2039-08-10	0.0015101	0.00150242	0.00147516
2039-09-10	0.00160674	0.00155528	0.001487
2039-10-10	0.00155928	0.00152297	0.0014831
2039-11-10	0.00146558	0.00146575	0.00144945
2039-12-10	0.0014595	0.00140547	0.00141941
2040-01-10	0.00135962	0.00135418	0.00136897
2040-02-09	0.00137168	0.00136397	0.00136703
2040-03-09	0.00138779	0.00138188	0.00140357
2040-04-09	0.00144326	0.00144416	0.00143644
2040-05-09	0.0014154	0.00141915	0.00143674
2040-06-09	0.00155926	0.0014868	0.00149379
2040-07-09	0.0016129	0.0015452	0.00148675
2040-08-09	0.00151375	0.00147666	0.00146187
2040-09-09	0.00145251	0.00151492	0.00147494
2040-10-09	0.00147757	0.00148743	0.00145764
2040-11-09	0.00145707	0.00149744	0.00148489
2040-12-09	0.00146121	0.00145151	0.00144898
2041-01-09	0.00142929	0.00144912	0.00142516
2041-02-08	0.00137322	0.00136903	0.00137903
2041-03-09	0.00143246	0.00141427	0.00140545
2041-04-09	0.00142964	0.00141394	0.00141477
2041-05-09	0.00150141	0.00144443	0.00146505
2041-06-09	0.00146611	0.00149893	0.00149482
2041-07-09	0.00151934	0.00152062	0.00149746
2041-08-09	0.00151544	0.00150399	0.00149155
2041-09-09	0.00148893	0.00149481	0.00148423
2041-10-09	0.00161436	0.00154259	0.00153534
2041-11-09	0.00145925	0.00147424	0.00145705
2041-12-09	0.00142892	0.00142711	0.00140958
2042-01-09	0.00140644	0.00139412	0.001413
2042-02-08	0.00141438	0.0014398	0.00142878
2042-03-09	0.00141119	0.00142752	0.00144564
2042-04-09	0.00144937	0.00144459	0.00144169
2042-05-09	0.00151812	0.00147665	0.00147052
2042-06-09	0.00147316	0.00148154	0.00150471
2042-07-09	0.00148692	0.00153403	0.0015563
2042-08-09	0.00153346	0.00150915	0.00151894
2042-09-09	0.00154483	0.00162492	0.00165827
2042-10-09	0.00150841	0.00146657	0.00147514
2042-11-09	0.00151777	0.00145068	0.00145333
2042-12-09	0.00149294	0.00149298	0.00148862
2043-01-09	0.00145653	0.00140578	0.0014146
2043-02-08	0.00139424	0.001396	0.00140009
2043-03-09	0.00144303	0.00142573	0.00142834
2043-04-09	0.00149687	0.00144583	0.00148472
2043-05-09	0.00147932	0.00148235	0.00148278
2043-06-09	0.00154241	0.00152697	0.00151625
2043-07-09	0.00153475	0.00165577	0.00158164
2043-08-09	0.00150886	0.00151509	0.00154397
2043-09-09	0.00159306	0.0015263	0.00155436
2043-10-09	0.00157923	0.00153942	0.00149189
2043-11-09	0.00153645	0.0014974	0.00150041
2043-12-09	0.00148703	0.00144973	0.00147187
2044-01-09	0.00144401	0.0014059	0.00142866
2044-02-08	0.00144845	0.00143453	0.00143863
2044-03-08	0.0014856	0.00145761	0.00147627
2044-04-08	0.00147384	0.00147725	0.00149923
2044-05-08	0.00148973	0.00149234	0.00150376
2044-06-08	0.00154436	0.00152049	0.00152262
2044-07-08	0.00159119	0.00154452	0.00158398
2044-08-08	0.00155224	0.0015892	0.00161027
2044-09-08	0.00157244	0.00157168	0.00152468
2044-10-08	0.0014677	0.00148781	0.00148958
2044-11-08	0.00148654	0.00147588	0.00148326
2044-12-08	0.00148759	0.0014799	0.00148656
2045-01-08	0.00148941	0.00147267	0.00147672
2045-02-07	0.00146045	0.00144422	0.00143532
2045-03-08	0.00141734	0.0014184	0.00141525
2045-04-08	0.00144045	0.00144506	0.00145129
2045-05-08	0.00152973	0.00154062	0.00152519
2045-06-08	0.00155045	0.0015401	0.00153571
2045-07-08	0.0017042	0.00156207	0.00156743
2045-08-08	0.00159178	0.00155094	0.00153869
2045-09-08	0.0015383	0.00162768	0.0015514
2045-10-08	0.00147853	0.00147984	0.00148026
2045-11-08	0.00152092	0.00147249	0.00146393
2045-12-08	0.00141153	0.00141139	0.0014145
2046-01-08	0.00142178	0.00141501	0.00141955
2046-02-07	0.00142329	0.00142326	0.0014215
2046-03-08	0.00146538	0.0014379	0.00143364
2046-04-08	0.0014689	0.0014687	0.00147014
2046-05-08	0.00151361	0.00151978	0.00153609
2046-06-08	0.0015147	0.00150732	0.00151457
2046-07-08	0.00156724	0.00156586	0.00154298
2046-08-08	0.00156042	0.00154636	0.0015664
2046-09-08	0.00153669	0.00156444	0.00154886
2046-10-08	0.00156547	0.00155272	0.00151408
2046-11-08	0.00157663	0.00151435	0.00151033
2046-12-08	0.00156377	0.00150681	0.00151661
2047-01-08	0.00144773	0.00143179	0.00143975
2047-02-07	0.00144829	0.00144788	0.00143491
2047-03-08	0.00147198	0.00146225	0.00146151
2047-04-08	0.00149847	0.00148724	0.00149579
2047-05-08	0.00155796	0.00150828	0.00152989
2047-06-08	0.00153495	0.00154111	0.00153377
2047-07-08	0.00160239	0.00156724	0.0016058
2047-08-08	0.00158676	0.00159205	0.00163395
2047-09-08	0.00153317	0.00157155	0.00162202
2047-10-08	0.00158132	0.00158597	0.0015936
2047-11-08	0.00157377	0.00153012	0.00152633
2047-12-08	0.00148409	0.00150856	0.001452
2048-01-08	0.00142739	0.00141829	0.00143187
2048-02-07	0.00143351	0.00141806	0.00141844
2048-03-07	0.00149594	0.00147654	0.00148717
2048-04-07	0.00148393	0.00147471	0.00149803
2048-05-07	0.00151081	0.00149976	0.00152761
2048-06-07	0.0015589	0.00152931	0.00154446
2048-07-07	0.0016089	0.00158565	0.00159531
2048-08-07	0.00166477	0.00160438	0.00156901
2048-09-07	0.00154401	0.00157582	0.00154051
2048-10-07	0.00151472	0.00153461	0.0015512
2048-11-07	0.00153892	0.00155506	0.00152994
2048-12-07	0.00151562	0.00150095	0.00150815
2049-01-07	0.00145002	0.00143823	0.00144777
2049-02-06	0.00144282	0.00141656	0.00143196
2049-03-07	0.00146905	0.00146364	0.00147474
2049-04-07	0.00150196	0.00149114	0.00148378
2049-05-07	0.00150143	0.00150381	0.00154599
2049-06-07	0.00158993	0.0015786	0.00155134
2049-07-07	0.00165435	0.00160548	0.0015854
2049-08-07	0.00158433	0.00157152	0.00160108
2049-09-07	0.00159667	0.00156034	0.00154737
2049-10-07	0.00157786	0.00152687	0.00151797
2049-11-07	0.00154921	0.00153924	0.00153965
2049-12-07	0.00149107	0.00146833	0.00147242
2050-01-07	0.00145417	0.00144292	0.00144979
2050-02-06	0.0014318	0.00143238	0.00143819
2050-03-07	0.00146889	0.00146089	0.0014668
2050-04-07	0.00149431	0.00152008	0.00150329
2050-05-07	0.00152576	0.00152251	0.00151288
2050-06-07	0.00158724	0.00153312	0.00154369
2050-07-07	0.001583	0.00162417	0.0015884
2050-08-07	0.00162011	0.00162074	0.00159761
2050-09-07	0.00160846	0.00156696	0.0015611
2050-10-07	0.00155493	0.00152067	0.00152761
2050-11-07	0.00158265	0.00155924	0.00153456
2050-12-07	0.00153646	0.00147964	0.00148669
2051-01-07 12:00:00	0.00145833	0.00144686	0.00145727
2051-02-06	0.00146571	0.00146089	0.00146503
2051-03-07 12:00:00	0.00151079	0.00151662	0.00150165
2051-04-07	0.00152976	0.00150335	0.0015255
2051-05-07 12:00:00	0.00153567	0.00153943	0.00158903
2051-06-07	0.00161418	0.00158896	0.00163541
2051-07-07 12:00:00	0.00162161	0.00158888	0.00159723
2051-08-07 12:00:00	0.00169217	0.00168758	0.00168642
2051-09-07	0.00160119	0.00157419	0.00158104
2051-10-07 12:00:00	0.00152108	0.00157743	0.00155867
2051-11-07	0.00157519	0.00157597	0.00158618
2051-12-07 12:00:00	0.00149942	0.00148189	0.00148218
2052-01-07 12:00:00	0.00151627	0.00147958	0.00147956
2052-02-06	0.00146809	0.00147108	0.00147803
2052-03-06 12:00:00	0.00146513	0.00146805	0.00147695
2052-04-06	0.00151041	0.0014967	0.00152146
2052-05-06 12:00:00	0.00159837	0.00154592	0.00154318
2052-06-06	0.00162032	0.00156384	0.00157865
2052-07-06 12:00:00	0.00160549	0.00158302	0.00159637
2052-08-06 12:00:00	0.00160331	0.00164486	0.00164597
2052-09-06	0.00159768	0.0015961	0.00160203
2052-10-06 12:00:00	0.00152852	0.00154084	0.00154793
2052-11-06	0.00159713	0.00158869	0.00157508
2052-12-06 12:00:00	0.00153152	0.00154662	0.00153833
2053-01-06 12:00:00	0.00150082	0.00148478	0.00149436
2053-02-05	0.00152852	0.00151377	0.00151712
2053-03-06 12:00:00	0.00152867	0.00150009	0.001503
2053-04-06	0.00158473	0.00154971	0.00155213
2053-05-06 12:00:00	0.00158772	0.00157193	0.00157037
2053-06-06	0.00166617	0.00160539	0.00160003
2053-07-06 12:00:00	0.00161588	0.00163047	0.00158605
2053-08-06 12:00:00	0.00163804	0.00164088	0.0016434
2053-09-06	0.00159489	0.00162871	0.00159383
2053-10-06 12:00:00	0.00158911	0.00160166	0.00164887
2053-11-06	0.00164776	0.00156655	0.00155368
2053-12-06 12:00:00	0.00161224	0.00152696	0.00153629
2054-01-06 12:00:00	0.00152372	0.00150766	0.00152186
2054-02-05	0.00149528	0.00149417	0.00149551
2054-03-06 12:00:00	0.00155152	0.0015182	0.00152034
2054-04-06	0.00154161	0.00154419	0.00155884
2054-05-06 12:00:00	0.0016221	0.00157161	0.00160522
2054-06-06	0.00161722	0.00167458	0.00163858
2054-07-06 12:00:00	0.00168558	0.00161674	0.00160797
2054-08-06 12:00:00	0.00170656	0.00163318	0.00162909
2054-09-06	0.00158997	0.00161038	0.00159859
2054-10-06 12:00:00	0.00162496	0.00164867	0.00163596
2054-11-06	0.00155949	0.00157882	0.00159661
2054-12-06 12:00:00	0.00159271	0.001554	0.00154846
2055-01-06 12:00:00	0.0015478	0.00152995	0.00153027
2055-02-05	0.00155255	0.00151617	0.00150012
2055-03-06 12:00:00	0.00149313	0.00149748	0.00150103
2055-04-06	0.00157062	0.00155595	0.0015715
2055-05-06 12:00:00	0.00158137	0.0015532	0.00157042
2055-06-06	0.00161822	0.00160284	0.00162112
2055-07-06 12:00:00	0.00166072	0.00164959	0.00165375
2055-08-06 12:00:00	0.0016403	0.00166575	0.00167329
2055-09-06	0.00166158	0.00169092	0.00166028
2055-10-06 12:00:00	0.00155094	0.00157629	0.00158462
2055-11-06	0.00163462	0.00165398	0.00159513
2055-12-06 12:00:00	0.00155278	0.00153466	0.00153762
2056-01-06 12:00:00	0.00151445	0.0015032	0.00151296
2056-02-05	0.00151489	0.00150606	0.00152097
2056-03-05 12:00:00	0.00154654	0.0015087	0.00152243
2056-04-05	0.00154255	0.00153813	0.00154955
2056-05-05 12:00:00	0.00157648	0.00157408	0.00158595
2056-06-05	0.00163173	0.00160739	0.00158886
2056-07-05 12:00:00	0.00161579	0.00164389	0.00170562
2056-08-05 12:00:00	0.00163141	0.00165003	0.0016596
2056-09-05	0.00158161	0.00160431	0.00158742
2056-10-05 12:00:00	0.00158515	0.00159967	0.00160201
2056-11-05	0.00161807	0.00158823	0.00160042
2056-12-05 12:00:00	0.00157852	0.001559	0.0015606
2057-01-05 12:00:00	0.00149862	0.00148586	0.00148519
2057-02-04	0.0015116	0.00150306	0.00149424
2057-03-05 12:00:00	0.00154844	0.00154444	0.00155619
2057-04-05	0.00168548	0.00158307	0.00158214
2057-05-05 12:00:00	0.00171382	0.0016067	0.00164048
2057-06-05	0.00160632	0.0016231	0.00161063
2057-07-05 12:00:00	0.00169127	0.00163576	0.00164219
2057-08-05 12:00:00	0.00167037	0.00166577	0.00168611
2057-09-05	0.00165553	0.00165643	0.00164792
2057-10-05 12:00:00	0.00158829	0.00159226	0.00159425
2057-11-05	0.00158418	0.00161768	0.00161861
2057-12-05 12:00:00	0.00157337	0.00157418	0.00155745
2058-01-05 12:00:00	0.00154192	0.00152139	0.00153816
2058-02-04	0.00154337	0.00154027	0.00154396
2058-03-05 12:00:00	0.00157462	0.00155088	0.00156281
2058-04-05	0.00161271	0.00156655	0.00157633
2058-05-05 12:00:00	0.00164814	0.00163137	0.00162962
2058-06-05	0.00166779	0.00162042	0.00168159
2058-07-05 12:00:00	0.00175525	0.00167085	0.00170527
2058-08-05 12:00:00	0.00162515	0.00162158	0.00168627
2058-09-05	0.00164464	0.00163231	0.00162452
2058-10-05 12:00:00	0.00162728	0.00167447	0.00162856
2058-11-05	0.00160569	0.00158126	0.00158187
2058-12-05 12:00:00	0.00154641	0.00154621	0.00154632
2059-01-05 12:00:00	0.00157011	0.00156763	0.00155451
2059-02-04	0.00153495	0.00152621	0.00154205
2059-03-05 12:00:00	0.00153852	0.00154223	0.00155016
2059-04-05	0.00156021	0.00157036	0.00156253
2059-05-05 12:00:00	0.00160255	0.00160961	0.00161255
2059-06-05	0.00168225	0.00163534	0.0016588
2059-07-05 12:00:00	0.00171026	0.00166305	0.00166244
2059-08-05 12:00:00	0.00171796	0.00167375	0.00165744
2059-09-05	0.00168006	0.00164173	0.00162817
2059-10-05 12:00:00	0.0016257	0.00161871	0.00162748
2059-11-05	0.00162647	0.00161785	0.00161561
2059-12-05 12:00:00	0.00158079	0.00157681	0.00158794
2060-01-05 12:00:00	0.0015742	0.00155603	0.00154863
2060-02-04	0.0015292	0.00152506	0.00153528
2060-03-04 12:00:00	0.00156047	0.00154914	0.00155396
2060-04-04	0.00160226	0.00160429	0.0016152
2060-05-04 12:00:00	0.001604	0.00159697	0.00162895
2060-06-04	0.00166232	0.00164978	0.00165369
2060-07-04 12:00:00	0.00164205	0.00164443	0.00164707
2060-08-04 12:00:00	0.00166437	0.0017052	0.001726
2060-09-04	0.00161781	0.00162733	0.00162303
2060-10-04 12:00:00	0.00164372	0.00165721	0.0016457
2060-11-04	0.00170729	0.00163512	0.00162946
2060-12-04 12:00:00	0.00163303	0.00158535	0.00157872
2061-01-04 12:00:00	0.00155804	0.00158467	0.00155291
2061-02-03	0.00153852	0.00153871	0.00154196
2061-03-04 12:00:00	0.00158353	0.00157366	0.0015775
2061-04-04	0.00162188	0.0016109	0.00163187
2061-05-04 12:00:00	0.00164906	0.00165342	0.00162803
2061-06-04	0.00167321	0.0016677	0.00167118
2061-07-04 12:00:00	0.00174897	0.00175484	0.00172603
2061-08-04 12:00:00	0.00175235	0.00169828	0.00168509
2061-09-04	0.00166784	0.00166629	0.00166147
2061-10-04 12:00:00	0.00173339	0.00163958	0.00164333
2061-11-04	0.00164706	0.00162419	0.00161213
2061-12-04 12:00:00	0.00158513	0.00158937	0.00159849
2062-01-04 12:00:00	0.00153601	0.00153471	0.00154558
2062-02-03	0.0015765	0.00155601	0.00157039
2062-03-04 12:00:00	0.00159448	0.00156966	0.00159266
2062-04-04	0.00164321	0.00161987	0.00163328
2062-05-04 12:00:00	0.00167332	0.00164601	0.00166616
2062-06-04	0.00166017	0.00165636	0.00168595
2062-07-04 12:00:00	0.001653	0.00165885	0.00167183
2062-08-04 12:00:00	0.0017619	0.00175355	0.0017585
2062-09-04	0.00170909	0.00168672	0.00171379
2062-10-04 12:00:00	0.00167161	0.00174336	0.00169517
2062-11-04	0.00163796	0.00162447	0.00166221
2062-12-04 12:00:00	0.00161425	0.00160254	0.0016006
2063-01-04 12:00:00	0.00158348	0.00160673	0.00157736
2063-02-03	0.00154512	0.00154689	0.00155156
2063-03-04 12:00:00	0.00157212	0.00157416	0.00156995
2063-04-04	0.00160882	0.0016191	0.0016034
2063-05-04 12:00:00	0.00165828	0.001647	0.00166812
2063-06-04	0.00167172	0.00173384	0.00170677
2063-07-04 12:00:00	0.00172465	0.00171189	0.00178764
2063-08-04 12:00:00	0.00170004	0.00171521	0.00180021
2063-09-04	0.00169913	0.00169635	0.00170291
2063-10-04 12:00:00	0.0016274	0.00170399	0.00168497
2063-11-04	0.00170024	0.00169276	0.00172307
2063-12-04 12:00:00	0.00162717	0.00160844	0.00162464
2064-01-04 12:00:00	0.00159663	0.00158388	0.0015718
2064-02-03	0.001578	0.00156616	0.00157027
2064-03-03 12:00:00	0.00161609	0.00160495	0.00161797
2064-04-03	0.00166261	0.00165254	0.00166769
2064-05-03 12:00:00	0.00168312	0.00165274	0.00166519
2064-06-03	0.00170996	0.00168906	0.00168886
2064-07-03 12:00:00	0.00170394	0.0017228	0.00170993
2064-08-03 12:00:00	0.0017336	0.00184472	0.00179499
2064-09-03	0.00167962	0.00167523	0.00168832
2064-10-03 12:00:00	0.0016794	0.0016545	0.00165201
2064-11-03	0.00168989	0.00166678	0.00167162
2064-12-03 12:00:00	0.00159545	0.00160468	0.00160842
2065-01-03 12:00:00	0.00158916	0.00156832	0.0015891
2065-02-02	0.00157282	0.00157247	0.00158193
2065-03-03 12:00:00	0.00160762	0.00160349	0.00160389
2065-04-03	0.00162443	0.00161755	0.00163015
2065-05-03 12:00:00	0.00166473	0.00164507	0.00164472
2065-06-03	0.00167467	0.00166395	0.00167499
2065-07-03 12:00:00	0.00168935	0.00171617	0.00171513
2065-08-03 12:00:00	0.00168712	0.00169957	0.00172371
2065-09-03	0.00171366	0.001773	0.00175177
2065-10-03 12:00:00	0.00172916	0.00169086	0.00166807
2065-11-03	0.00168392	0.00164839	0.00165621
2065-12-03 12:00:00	0.0016558	0.00166332	0.00162724
2066-01-03 12:00:00	0.00159253	0.00160195	0.00160111
2066-02-02	0.00159634	0.00158895	0.00161374
2066-03-03 12:00:00	0.00164312	0.0016227	0.00162545
2066-04-03	0.00165585	0.0016381	0.0016548
2066-05-03 12:00:00	0.00172273	0.00168447	0.00167944
2066-06-03	0.00173775	0.00169254	0.0017034
2066-07-03 12:00:00	0.00172503	0.00174308	0.00170999
2066-08-03 12:00:00	0.0017841	0.00179992	0.00173146
2066-09-03	0.00170519	0.00171818	0.00169977
2066-10-03 12:00:00	0.00171731	0.00175835	0.00170753
2066-11-03	0.00167169	0.00163616	0.00163912
2066-12-03 12:00:00	0.00171688	0.00164248	0.00163969
2067-01-03 12:00:00	0.00159928	0.00159341	0.0015999
2067-02-02	0.00159705	0.00158603	0.00159993
2067-03-03 12:00:00	0.00159739	0.00159427	0.00159865
2067-04-03	0.00168064	0.00167411	0.00170445
2067-05-03 12:00:00	0.00171148	0.00167819	0.00168397
2067-06-03	0.00172957	0.0017225	0.00170666
2067-07-03 12:00:00	0.00185198	0.00174755	0.00177183
2067-08-03 12:00:00	0.00172077	0.00171609	0.00170594
2067-09-03	0.00169945	0.00172286	0.00169994
2067-10-03 12:00:00	0.00179003	0.00179393	0.0017511
2067-11-03	0.00170339	0.00170023	0.00167818
2067-12-03 12:00:00	0.00173375	0.00167403	0.00165946
2068-01-03 12:00:00	0.00172256	0.00161471	0.00161936
2068-02-02	0.00160176	0.00159167	0.00158969
2068-03-02 12:00:00	0.00161304	0.00160715	0.00161396
2068-04-02	0.00169126	0.00165499	0.00168895
2068-05-02 12:00:00	0.00175811	0.00170374	0.00173863
2068-06-02	0.0017193	0.0017086	0.00170691
2068-07-02 12:00:00	0.00170355	0.00172585	0.00175696
2068-08-02 12:00:00	0.00184622	0.00181714	0.00177926
2068-09-02	0.00183345	0.00172467	0.0017758
2068-10-02 12:00:00	0.00170302	0.00172817	0.00172464
2068-11-02	0.00170392	0.00168737	0.00170261
2068-12-02 12:00:00	0.00174248	0.00170632	0.00167506
2069-01-02 12:00:00	0.00171342	0.00176889	0.00172786
2069-02-01	0.00164593	0.0016243	0.00163796
2069-03-02 12:00:00	0.00164298	0.00162526	0.00164917
2069-04-02	0.00165175	0.00164438	0.00165793
2069-05-02 12:00:00	0.00168547	0.00169154	0.00168659
2069-06-02	0.00182529	0.00173163	0.00173333
2069-07-02 12:00:00	0.00190848	0.00181469	0.0017946
2069-08-02 12:00:00	0.0017742	0.0017339	0.001748
2069-09-02	0.00174659	0.00176064	0.00178695
2069-10-02 12:00:00	0.00178402	0.00173719	0.00174753
2069-11-02	0.00169242	0.00167255	0.00167796
2069-12-02 12:00:00	0.00168589	0.00164477	0.00165098
2070-01-02 12:00:00	0.00160035	0.00160145	0.00160227
2070-02-01	0.00161411	0.00161531	0.0016194
2070-03-02 12:00:00	0.0016276	0.00163217	0.00163145
2070-04-02	0.00168943	0.0017052	0.0017161
2070-05-02 12:00:00	0.00177805	0.00170387	0.0017151
2070-06-02	0.00198031	0.00177697	0.00179396
2070-07-02 12:00:00	0.00174305	0.00174114	0.00184262
2070-08-02 12:00:00	0.00187059	0.0018287	0.00183404
2070-09-02	0.0017633	0.00173246	0.00172597
2070-10-02 12:00:00	0.00168745	0.00175241	0.00171707
2070-11-02	0.0016638	0.00167768	0.0016878
2070-12-02 12:00:00	0.00166298	0.00164757	0.00163358
2071-01-02 12:00:00	0.00166888	0.00164705	0.00164086
2071-02-01	0.00161788	0.001627	0.0016291
2071-03-02 12:00:00	0.00163679	0.00163248	0.00163562
2071-04-02	0.00168807	0.0016779	0.00168382
2071-05-02 12:00:00	0.00173117	0.00170713	0.00172787
2071-06-02	0.0017641	0.00172882	0.00174002
2071-07-02 12:00:00	0.00185887	0.00176415	0.00181526
2071-08-02 12:00:00	0.00175947	0.00174865	0.00175479
2071-09-02	0.00172501	0.00175442	0.00175569
2071-10-02 12:00:00	0.00171263	0.00171473	0.00174265
2071-11-02	0.00174437	0.00173785	0.00174197
2071-12-02 12:00:00	0.00173622	0.00168175	0.0016807
2072-01-02 12:00:00	0.00164408	0.0016303	0.00163324
2072-02-01	0.00163354	0.00163033	0.00162708
2072-03-01 12:00:00	0.00165677	0.00165141	0.00167247
2072-04-01	0.00175787	0.00172329	0.00170898
2072-05-01 12:00:00	0.00182276	0.00175175	0.00175093
2072-06-01	0.0017348	0.00172802	0.00175809
2072-07-01 12:00:00	0.00174996	0.0017438	0.00175077
2072-08-01 12:00:00	0.00176327	0.00176878	0.00179619
2072-09-01	0.00179171	0.00181828	0.00183981
2072-10-01 12:00:00	0.00170006	0.00172046	0.00171981
2072-11-01	0.0016928	0.00167981	0.00169259
2072-12-01 12:00:00	0.00167628	0.00168083	0.00169742
2073-01-01 12:00:00	0.00165434	0.00164002	0.00163967
2073-01-31	0.00162991	0.0016235	0.00163077
2073-03-01 12:00:00	0.00172809	0.00167077	0.00165997
2073-04-01	0.00169932	0.00169454	0.00170448
2073-05-01 12:00:00	0.00174637	0.00173999	0.0017802
2073-06-01	0.001802	0.00176244	0.00175412
2073-07-01 12:00:00	0.00183885	0.00183582	0.00196288
2073-08-01 12:00:00	0.00175039	0.00190208	0.00183629
2073-09-01	0.00179503	0.00176144	0.00177863
2073-10-01 12:00:00	0.00175221	0.00180091	0.00173077
2073-11-01	0.00173602	0.00172659	0.00174318
2073-12-01 12:00:00	0.00167486	0.00164701	0.00165475
2074-01-01 12:00:00	0.00166757	0.00163093	0.00162223
2074-01-31	0.00161637	0.00161565	0.00162564
2074-03-01 12:00:00	0.00166756	0.00165976	0.00165878
2074-04-01	0.00167657	0.00170065	0.00169396
2074-05-01 12:00:00	0.00177478	0.00171574	0.00172923
2074-06-01	0.00191468	0.00177091	0.00183454
2074-07-01 12:00:00	0.00175748	0.00179148	0.00177647
2074-08-01 12:00:00	0.00184367	0.00179991	0.0018535
2074-09-01	0.00173563	0.00173239	0.00176441
2074-10-01 12:00:00	0.00171841	0.0017182	0.00173033
2074-11-01	0.00178712	0.00172881	0.00171178
2074-12-01 12:00:00	0.00167634	0.00166421	0.00166125
2075-01-01 12:00:00	0.00164474	0.00163352	0.00163784
2075-01-31	0.0016448	0.00163949	0.00164907
2075-03-01 12:00:00	0.00165018	0.00164908	0.00165188
2075-04-01	0.00169485	0.00169583	0.00170305
2075-05-01 12:00:00	0.00174189	0.00173048	0.00175286
2075-06-01	0.00174498	0.00173955	0.00174991
2075-07-01 12:00:00	0.00186361	0.0017979	0.00176692
2075-08-01 12:00:00	0.00181866	0.00177406	0.00181625
2075-09-01	0.00181457	0.0017846	0.00178289
2075-10-01 12:00:00	0.00175805	0.00173496	0.00174737
2075-11-01	0.00176117	0.00177005	0.00177032
2075-12-01 12:00:00	0.00170611	0.00168199	0.00167397
2076-01-01 12:00:00	0.00168564	0.0016809	0.00168211
2076-01-31	0.00166969	0.00166075	0.00165681
2076-02-29 12:00:00	0.00173117	0.00170236	0.00172106
2076-03-31	0.00171993	0.00172195	0.0017326
2076-04-30 12:00:00	0.0017939	0.00174363	0.00176898
2076-05-31	0.00179289	0.00180367	0.00179736
2076-06-30 12:00:00	0.00178684	0.00176287	0.00178752
2076-07-31 12:00:00	0.00183863	0.00183314	0.0018577
2076-08-31	0.00181907	0.00181784	0.0018375
2076-09-30 12:00:00	0.001768	0.00186735	0.00179339
2076-10-31	0.0017201	0.00171281	0.00172118
2076-11-30 12:00:00	0.00171567	0.00170237	0.00169413
2076-12-31 12:00:00	0.00166581	0.00165653	0.00165787
2077-01-30	0.00166735	0.00167119	0.00165393
2077-02-28 12:00:00	0.00170986	0.00169179	0.00169791
2077-03-31	0.00172001	0.00171469	0.001721
2077-04-30 12:00:00	0.00173633	0.00174096	0.0017614
2077-05-31	0.00176823	0.00177537	0.00177358
2077-06-30 12:00:00	0.00178188	0.00181555	0.00182075
2077-07-31 12:00:00	0.00179112	0.00179549	0.00179056
2077-08-31	0.00175892	0.00178116	0.00174918
2077-09-30 12:00:00	0.00176437	0.00179783	0.0018149
2077-10-31	0.00175064	0.00179067	0.0017624
2077-11-30 12:00:00	0.00171885	0.00170639	0.00170738
2077-12-31 12:00:00	0.00172979	0.00168688	0.00169105
2078-01-30	0.00169328	0.00170439	0.00168715
2078-02-28 12:00:00	0.00170207	0.00169241	0.00170042
2078-03-31	0.00169916	0.00170459	0.00171507
2078-04-30 12:00:00	0.0017766	0.00174504	0.00176303
2078-05-31	0.00190885	0.00185066	0.00188474
2078-06-30 12:00:00	0.0018083	0.00179811	0.00184711
2078-07-31 12:00:00	0.00192755	0.00189388	0.00193424
2078-08-31	0.00181779	0.00190086	0.00199928
2078-09-30 12:00:00	0.00186977	0.0017595	0.00175716
2078-10-31	0.0017635	0.00173875	0.00175429
2078-11-30 12:00:00	0.00172518	0.00172134	0.00171876
2078-12-31 12:00:00	0.00167249	0.00166822	0.00166952
2079-01-30	0.00167754	0.00167464	0.00168028
2079-02-28 12:00:00	0.00170958	0.00171002	0.00170616
2079-03-31	0.00174847	0.00172985	0.00174743
2079-04-30 12:00:00	0.00188791	0.00179406	0.00181
2079-05-31	0.00178215	0.00179224	0.00180379
2079-06-30 12:00:00	0.00184132	0.00179606	0.00182326
2079-07-31 12:00:00	0.00189488	0.00187253	0.00185467
2079-08-31	0.00178204	0.00177514	0.00177227
2079-09-30 12:00:00	0.00176531	0.00179667	0.00176005
2079-10-31	0.00179775	0.00179103	0.00176728
2079-11-30 12:00:00	0.00176358	0.00175818	0.00176999
2079-12-31 12:00:00	0.00170637	0.00169421	0.00170137
2080-01-30	0.00172591	0.0017241	0.00169318
2080-02-28 12:00:00	0.0017284	0.00171633	0.0017202
2080-03-30	0.00177304	0.00175145	0.00176323
2080-04-29 12:00:00	0.00179103	0.00176509	0.00179705
2080-05-30	0.00182448	0.00180607	0.00186539
2080-06-29 12:00:00	0.00181982	0.00182064	0.00182918
2080-07-30 12:00:00	0.00185257	0.00186923	0.00185854
2080-08-30	0.00221669	0.00180215	0.0018243
2080-09-29 12:00:00	0.00175181	0.00179457	0.00178372
2080-10-30	0.0017843	0.0017458	0.00172347
2080-11-29 12:00:00	0.00172018	0.00171291	0.00170048
2080-12-30 12:00:00	0.0017115	0.00167966	0.001678
2081-01-29	0.00165689	0.00166505	0.00166213
2081-02-27 12:00:00	0.00170568	0.00169553	0.00169561
2081-03-30	0.00171139	0.00171586	0.00171261
2081-04-29 12:00:00	0.00175629	0.00175706	0.00176757
2081-05-30	0.00179683	0.00188393	0.00185136
2081-06-29 12:00:00	0.00182421	0.00180555	0.00184418
2081-07-30 12:00:00	0.00187623	0.00186469	0.00182819
2081-08-30	0.00181348	0.00180148	0.00186032
2081-09-29 12:00:00	0.00178682	0.00178059	0.00176598
2081-10-30	0.00192731	0.00190132	0.00180556
2081-11-29 12:00:00	0.0017852	0.00172683	0.00172681
2081-12-30 12:00:00	0.00173502	0.00172088	0.00172285
2082-01-29	0.00173149	0.00173536	0.00172499
2082-02-27 12:00:00	0.00174117	0.00173916	0.00173854
2082-03-30	0.00175894	0.00175782	0.00177755
2082-04-29 12:00:00	0.00179838	0.00176315	0.00179955
2082-05-30	0.00198626	0.00183029	0.00182054
2082-06-29 12:00:00	0.00187574	0.00184078	0.00184567
2082-07-30 12:00:00	0.00181929	0.00187199	0.00185493
2082-08-30	0.00184906	0.00181478	0.00177843
2082-09-29 12:00:00	0.00178381	0.0017713	0.00181826
2082-10-30	0.00179983	0.00175838	0.00177509
2082-11-29 12:00:00	0.00174343	0.00173099	0.00173944
2082-12-30 12:00:00	0.00175757	0.00171007	0.00171192
2083-01-29	0.00174267	0.00171592	0.00171991
2083-02-27 12:00:00	0.00171741	0.00171205	0.00171719
2083-03-30	0.0017568	0.00177798	0.00176179
2083-04-29 12:00:00	0.00179582	0.00177853	0.00179386
2083-05-30	0.00188021	0.00182878	0.00182463
2083-06-29 12:00:00	0.00204885	0.00185869	0.0018152
2083-07-30 12:00:00	0.0018686	0.00189079	0.00186229
2083-08-30	0.00189498	0.00183177	0.00183096
2083-09-29 12:00:00	0.00179724	0.00180129	0.00182101
2083-10-30	0.00183944	0.00177473	0.001819
2083-11-29 12:00:00	0.00179132	0.001736	0.00171968
2083-12-30 12:00:00	0.00174634	0.00172308	0.00172303
2084-01-29	0.00172047	0.00171129	0.00172542
2084-02-27 12:00:00	0.00173428	0.0017261	0.00172892
2084-03-29	0.00177872	0.00176526	0.00176882
2084-04-28 12:00:00	0.00179715	0.00184602	0.00183124
2084-05-29	0.00187255	0.00184498	0.00186129
2084-06-28 12:00:00	0.00192329	0.00186331	0.00192979
2084-07-29 12:00:00	0.00181128	0.00181566	0.00183796
2084-08-29	0.00182848	0.00186308	0.00180804
2084-09-28 12:00:00	0.00191004	0.0018223	0.00178526
2084-10-29	0.00178688	0.0017959	0.00176933
2084-11-28 12:00:00	0.00178523	0.00173488	0.00173862
2084-12-29 12:00:00	0.00172379	0.00170536	0.00170183
2085-01-28	0.00172918	0.00172732	0.00172023
2085-02-26 12:00:00	0.00172698	0.00172571	0.00172813
2085-03-29	0.00184622	0.001773	0.0017874
2085-04-28 12:00:00	0.00178348	0.00178479	0.00180662
2085-05-29	0.00195989	0.0018365	0.00185377
2085-06-28 12:00:00	0.0018466	0.00183511	0.0018468
2085-07-29 12:00:00	0.00186411	0.00187869	0.00194058
2085-08-29	0.00182092	0.00182219	0.00183721
2085-09-28 12:00:00	0.0018035	0.00180121	0.00181799
2085-10-29	0.0017933	0.00181969	0.0017942
2085-11-28 12:00:00	0.00183766	0.00178596	0.0017841
2085-12-29 12:00:00	0.00172638	0.00171634	0.00174505
2086-01-28	0.00172199	0.00172054	0.0017383
2086-02-26 12:00:00	0.00179047	0.00176865	0.00177419
2086-03-29	0.00179524	0.00178145	0.00179773
2086-04-28 12:00:00	0.00186534	0.00183473	0.00182374
2086-05-29	0.00189296	0.00184975	0.00187363
2086-06-28 12:00:00	0.00192487	0.00186291	0.00184647
2086-07-29 12:00:00	0.00184309	0.00185638	0.001845
2086-08-29	0.00183294	0.00188013	0.00184708
2086-09-28 12:00:00	0.00181932	0.0018172	0.00181301
2086-10-29	0.00176755	0.0017863	0.00177495
2086-11-28 12:00:00	0.00179721	0.00177777	0.00177415
2086-12-29 12:00:00	0.00174255	0.00172865	0.00173814
2087-01-28	0.00176576	0.00174003	0.00175619
2087-02-26 12:00:00	0.00173655	0.00174343	0.00174361
2087-03-29	0.00179324	0.00178556	0.00180378
2087-04-28 12:00:00	0.00185203	0.00180917	0.00182106
2087-05-29	0.0018072	0.00180959	0.00182344
2087-06-28 12:00:00	0.00183835	0.00186206	0.001897
2087-07-29 12:00:00	0.00194175	0.00189315	0.00189672
2087-08-29	0.0018058	0.00182977	0.00182528
2087-09-28 12:00:00	0.00179251	0.00178712	0.00180489
2087-10-29	0.00181213	0.00179453	0.00180158
2087-11-28 12:00:00	0.00180143	0.00174197	0.0017358
2087-12-29 12:00:00	0.00180928	0.0017722	0.00176511
2088-01-28	0.00174548	0.0017296	0.00173703
2088-02-26 12:00:00	0.00177559	0.00174456	0.00176589
2088-03-28	0.00185995	0.00179389	0.00179839
2088-04-27 12:00:00	0.00180019	0.00180206	0.00181042
2088-05-28	0.00183612	0.0018268	0.00185254
2088-06-27 12:00:00	0.00194945	0.00189242	0.00187601
2088-07-28 12:00:00	0.00185008	0.00189384	0.00186763
2088-08-28	0.00180592	0.00182814	0.00181273
2088-09-27 12:00:00	0.00182265	0.00187857	0.00184947
2088-10-28	0.00180378	0.00179216	0.00178572
2088-11-27 12:00:00	0.00173828	0.00173448	0.00173233
2088-12-28 12:00:00	0.00173758	0.00172632	0.00172234
2089-01-27	0.00172305	0.00172598	0.00172316
2089-02-25 12:00:00	0.00176091	0.00174686	0.0017636
2089-03-28	0.00175993	0.00175532	0.00176465
2089-04-27 12:00:00	0.00182154	0.0018059	0.00181067
2089-05-28	0.00183494	0.00183938	0.00187636
2089-06-27 12:00:00	0.00202174	0.00189545	0.0019694
2089-07-28 12:00:00	0.00189915	0.00186987	0.00193637
2089-08-28	0.00186997	0.00184477	0.00186031
2089-09-27 12:00:00	0.00181381	0.00182433	0.00183673
2089-10-28	0.00183058	0.00180985	0.00181397
2089-11-27 12:00:00	0.00180641	0.00177918	0.00178163
2089-12-28 12:00:00	0.00174826	0.00174578	0.00175172
2090-01-27	0.00174126	0.00173841	0.00175198
2090-02-25 12:00:00	0.0017942	0.00179394	0.0017782
2090-03-28	0.00181615	0.00180622	0.00181316
2090-04-27 12:00:00	0.00181186	0.00181844	0.00182303
2090-05-28	0.00193625	0.00188924	0.00187598
2090-06-27 12:00:00	0.00190219	0.0018874	0.00188592
2090-07-28 12:00:00	0.00198382	0.0019715	0.00193588
2090-08-28	0.00186212	0.00183127	0.00182325
2090-09-27 12:00:00	0.00181625	0.00185994	0.0018557
2090-10-28	0.00181578	0.00181978	0.00183509
2090-11-27 12:00:00	0.00185232	0.00180538	0.00176738
2090-12-28 12:00:00	0.00173958	0.00174831	0.00173741
2091-01-27	0.0017581	0.00175219	0.00174371
2091-02-25 12:00:00	0.00174909	0.00174443	0.00176076
2091-03-28	0.00177589	0.0017687	0.00177014
2091-04-27 12:00:00	0.00183085	0.0018661	0.00185771
2091-05-28	0.0018721	0.00186184	0.00184399
2091-06-27 12:00:00	0.00188907	0.00188467	0.00186594
2091-07-28 12:00:00	0.00190052	0.00187058	0.00187578
2091-08-28	0.00188253	0.00192535	0.00198826
2091-09-27 12:00:00	0.00190161	0.00186484	0.00181908
2091-10-28	0.00180822	0.00179442	0.00179252
2091-11-27 12:00:00	0.00185719	0.00181316	0.00180641
2091-12-28 12:00:00	0.00174688	0.00175114	0.00175715
2092-01-27	0.00176148	0.0017556	0.00176525
2092-02-25 12:00:00	0.0017479	0.00175649	0.0017522
2092-03-27	0.00180031	0.00179573	0.00180749
2092-04-26 12:00:00	0.00186113	0.00183436	0.00185305
2092-05-27	0.00187584	0.00184697	0.00185309
2092-06-26 12:00:00	0.00189186	0.00192909	0.00192212
2092-07-27 12:00:00	0.00189732	0.00187076	0.00188045
2092-08-27	0.00198056	0.00193416	0.00195853
2092-09-26 12:00:00	0.00189603	0.00183895	0.00184592
2092-10-27	0.00185993	0.00183024	0.00181869
2092-11-26 12:00:00	0.0018239	0.00183139	0.00178683
2092-12-27 12:00:00	0.00181213	0.00179487	0.0017916
2093-01-26	0.00192213	0.00177853	0.0017673
2093-02-24 12:00:00	0.00178779	0.00176778	0.00178333
2093-03-27	0.00180968	0.00181234	0.00182213
2093-04-26 12:00:00	0.00183583	0.00184711	0.00184479
2093-05-27	0.00191045	0.00187804	0.001916
2093-06-26 12:00:00	0.00196639	0.00194992	0.00198568
2093-07-27 12:00:00	0.00192426	0.00189262	0.00190711
2093-08-27	0.00189215	0.00193828	0.00193492
2093-09-26 12:00:00	0.00183028	0.0018336	0.00183287
2093-10-27	0.00182887	0.0018576	0.0018782
2093-11-26 12:00:00	0.00184569	0.00182022	0.00182414
2093-12-27 12:00:00	0.00177203	0.00175876	0.00175172
2094-01-26	0.0017904	0.00178596	0.00179069
2094-02-24 12:00:00	0.00180804	0.00179447	0.00181235
2094-03-27	0.00181993	0.00181156	0.00183023
2094-04-26 12:00:00	0.00187391	0.00185156	0.00188011
2094-05-27	0.0018665	0.00186181	0.00188197
2094-06-26 12:00:00	0.00199753	0.00202514	0.00198843
2094-07-27 12:00:00	0.00191071	0.00189624	0.0019748
2094-08-27	0.00187068	0.00188094	0.00194732
2094-09-26 12:00:00	0.00185645	0.00187485	0.00193506
2094-10-27	0.001867	0.00189106	0.00186956
2094-11-26 12:00:00	0.00188793	0.00182398	0.00182077
2094-12-27 12:00:00	0.00177196	0.00175583	0.00176468
2095-01-26	0.00178054	0.00177766	0.00176936
2095-02-24 12:00:00	0.00178798	0.00178331	0.00179617
2095-03-27	0.00180523	0.00179372	0.00182021
2095-04-26 12:00:00	0.00185469	0.00185549	0.00185748
2095-05-27	0.00188507	0.00187905	0.00186725
2095-06-26 12:00:00	0.00191498	0.00190154	0.00188812
2095-07-27 12:00:00	0.00193221	0.00188857	0.00187238
2095-08-27	0.00190146	0.00190841	0.00193369
2095-09-26 12:00:00	0.0019128	0.00188642	0.00190213
2095-10-27	0.00189369	0.00185972	0.00186527
2095-11-26 12:00:00	0.00180324	0.00180362	0.00179309
2095-12-27 12:00:00	0.00180641	0.00181857	0.00176157
2096-01-26	0.00174945	0.00174638	0.00175086
2096-02-24 12:00:00	0.00177509	0.0017678	0.00176536
2096-03-26	0.0018043	0.00182079	0.00182758
2096-04-25 12:00:00	0.00183829	0.00183691	0.00183055
2096-05-26	0.00188137	0.00191334	0.00190407
2096-06-25 12:00:00	0.00199846	0.0019216	0.00192678
2096-07-26 12:00:00	0.00197071	0.00191145	0.00193874
2096-08-26	0.00184469	0.00188542	0.00188099
2096-09-25 12:00:00	0.00186095	0.00188741	0.00189549
2096-10-26	0.0018195	0.00184811	0.00182455
2096-11-25 12:00:00	0.00181585	0.00181	0.00180114
2096-12-26 12:00:00	0.00175367	0.00175099	0.00175202
2097-01-25	0.00175722	0.00175018	0.00176688
2097-02-23 12:00:00	0.00177613	0.00177855	0.00177857
2097-03-26	0.00181567	0.001845	0.00184736
2097-04-25 12:00:00	0.00190635	0.00185946	0.00187302
2097-05-26	0.00190057	0.00188647	0.0019104
2097-06-25 12:00:00	0.00196675	0.00191644	0.00190253
2097-07-26 12:00:00	0.00193504	0.00191866	0.00193781
2097-08-26	0.00186921	0.00187187	0.00187977
2097-09-25 12:00:00	0.00184238	0.00184665	0.00185428
2097-10-26	0.00187135	0.00187374	0.00189977
2097-11-25 12:00:00	0.00185983	0.00183845	0.00183963
2097-12-26 12:00:00	0.00179826	0.00176178	0.00177274
2098-01-25	0.00179392	0.00177229	0.00178937
2098-02-23 12:00:00	0.00181054	0.00179833	0.00180521
2098-03-26	0.00189277	0.00183266	0.00184147
2098-04-25 12:00:00	0.00196795	0.00188564	0.00190076
2098-05-26	0.00188631	0.00189015	0.00196056
2098-06-25 12:00:00	0.00191212	0.00188609	0.00188054
2098-07-26 12:00:00	0.00192859	0.00195199	0.00198491
2098-08-26	0.00192254	0.00198603	0.00199583
2098-09-25 12:00:00	0.00187883	0.00185554	0.00185912
2098-10-26	0.0018832	0.00185708	0.00186801
2098-11-25 12:00:00	0.00182065	0.00181942	0.00183792
2098-12-26 12:00:00	0.00184221	0.00181363	0.0018193
2099-01-25	0.00180321	0.00180651	0.0018071
2099-02-23 12:00:00	0.00185233	0.0018289	0.00185906
2099-03-26	0.0018706	0.00186263	0.00196766
2099-04-25 12:00:00	0.00192852	0.00189595	0.00187715
2099-05-26	0.00191598	0.0019519	0.0019516
2099-06-25 12:00:00	0.00193434	0.00192616	0.00194214
2099-07-26 12:00:00	0.00212297	0.00196947	0.00194693
2099-08-26	0.00194076	0.00197043	0.00192847
2099-09-25 12:00:00	0.00184692	0.00185084	0.00183874
2099-10-26	0.00190066	0.0018966	0.00189056
2099-11-25 12:00:00	0.00187948	0.00183292	0.00185577

## Sheet: Table SF8
Time	East Coast	Pearl River Delta	West Coast
2015-01-16	2.27843	2.25014	2.24268
2015-02-15	2.27436	2.28876	2.29151
2015-03-16	2.26231	2.29936	2.28454
2015-04-16	2.30909	2.28748	2.26403
2015-05-16	2.3001	2.25508	2.20721
2015-06-16	2.23068	2.27169	2.30035
2015-07-16	1.9379	2.29044	2.25812
2015-08-16	2.02723	2.0816	2.05578
2015-09-16	2.07799	2.20065	2.14908
2015-10-16	2.28777	2.20363	2.19907
2015-11-16	2.16324	2.29458	2.27435
2015-12-16	2.21336	2.32142	2.30945
2016-01-16	2.25753	2.34109	2.3521
2016-02-15	2.34555	2.32427	2.35984
2016-03-15	2.33569	2.32046	2.3244
2016-04-15	2.26854	2.27158	2.28833
2016-05-15	2.29215	2.28593	2.28675
2016-06-15	2.30963	2.30084	2.33084
2016-07-15	2.31723	2.27508	2.24296
2016-08-15	2.0206	2.18586	2.1857
2016-09-15	2.30989	2.26917	2.2372
2016-10-15	2.18883	2.16224	2.26865
2016-11-15	2.21974	2.32852	2.31042
2016-12-15	2.34612	2.4012	2.39028
2017-01-15	2.25208	2.33693	2.34757
2017-02-14	2.32456	2.3591	2.32977
2017-03-15	2.28132	2.27009	2.30059
2017-04-15	2.31771	2.28834	2.27641
2017-05-15	2.21211	2.30118	2.28752
2017-06-15	2.2174	2.32553	2.35443
2017-07-15	2.1515	2.13553	2.20539
2017-08-15	2.19286	2.26811	2.17634
2017-09-15	2.2624	2.24536	2.20379
2017-10-15	2.39748	2.3913	2.38144
2017-11-15	2.2714	2.25716	2.3081
2017-12-15	2.21697	2.33574	2.34615
2018-01-15	2.35274	2.39096	2.37808
2018-02-14	2.36659	2.35848	2.35195
2018-03-15	2.31903	2.32468	2.31856
2018-04-15	2.36425	2.35139	2.35018
2018-05-15	2.28295	2.30032	2.27548
2018-06-15	2.15855	2.21022	2.2518
2018-07-15	2.20363	2.23555	2.20007
2018-08-15	2.02916	2.17623	2.22685
2018-09-15	2.15649	2.31067	2.27415
2018-10-15	2.35183	2.32427	2.35187
2018-11-15	2.30312	2.31902	2.34576
2018-12-15	2.1945	2.2615	2.28947
2019-01-15	2.28674	2.07727	2.24522
2019-02-14	2.31058	2.37777	2.38574
2019-03-15	2.37292	2.37278	2.35658
2019-04-15	2.36353	2.34062	2.24929
2019-05-15	2.34428	2.3625	2.347
2019-06-15	2.23675	2.27053	2.1222
2019-07-15	2.2494	2.263	2.19404
2019-08-15	2.13066	2.35428	2.25373
2019-09-15	2.25832	2.27209	2.18523
2019-10-15	2.33275	2.29966	2.29344
2019-11-15	2.22505	2.3119	2.31408
2019-12-15	2.26558	2.36513	2.37362
2020-01-15	2.39959	2.41938	2.44132
2020-02-14	2.36586	2.38019	2.39568
2020-03-14	2.38793	2.39111	2.39451
2020-04-14	2.29587	2.29425	2.28301
2020-05-14	2.27655	2.35355	2.29007
2020-06-14	2.36603	2.37804	2.36317
2020-07-14	2.22803	2.29302	2.33258
2020-08-14	2.30979	2.29177	2.32375
2020-09-14	2.3219	2.31855	2.34742
2020-10-14	2.35806	2.34657	2.35088
2020-11-14	2.32824	2.43272	2.45057
2020-12-14	2.31197	2.43486	2.45463
2021-01-14	2.42504	2.43339	2.43442
2021-02-13	2.45566	2.45445	2.44565
2021-03-14	2.43867	2.42108	2.40999
2021-04-14	2.38042	2.35772	2.35216
2021-05-14	2.43616	2.41392	2.40735
2021-06-14	2.40016	2.3877	2.37072
2021-07-14	2.20735	2.28966	2.26897
2021-08-14	2.24066	2.37708	2.3753
2021-09-14	2.37746	2.31557	2.39009
2021-10-14	2.34757	2.41545	2.36325
2021-11-14	2.07176	2.15093	2.37118
2021-12-14	2.22819	2.44349	2.4896
2022-01-14	2.33014	2.26335	2.36634
2022-02-13	2.44457	2.43723	2.43898
2022-03-14	2.36543	2.40647	2.44042
2022-04-14	2.37851	2.4099	2.4339
2022-05-14	2.41865	2.41472	2.41173
2022-06-14	2.37559	2.42649	2.41078
2022-07-14	2.27539	2.25099	2.28456
2022-08-14	2.31514	2.34803	2.32824
2022-09-14	2.36267	2.25241	2.31821
2022-10-14	2.37243	2.20669	2.1553
2022-11-14	2.41103	2.45119	2.45101
2022-12-14	2.39745	2.47177	2.46822
2023-01-14	2.45616	2.49478	2.50833
2023-02-13	2.4085	2.4801	2.46357
2023-03-14	2.41761	2.43347	2.42791
2023-04-14	2.46039	2.45269	2.41377
2023-05-14	2.36268	2.38546	2.3664
2023-06-14	2.32414	2.422	2.43365
2023-07-14	2.2732	2.3116	2.33435
2023-08-14	2.3135	2.3054	2.28425
2023-09-14	2.28357	2.24907	2.32239
2023-10-14	2.30832	2.37866	2.40926
2023-11-14	2.13583	2.25045	2.40434
2023-12-14	2.48464	2.48204	2.45164
2024-01-14	2.45869	2.50676	2.46898
2024-02-13	2.48865	2.51066	2.51445
2024-03-13	2.47502	2.51215	2.5237
2024-04-13	2.33495	2.39135	2.39505
2024-05-13	2.41439	2.44795	2.45068
2024-06-13	2.37485	2.33405	2.31242
2024-07-13	2.38092	2.40947	2.29285
2024-08-13	2.25036	2.34727	2.31732
2024-09-13	2.37797	2.3965	2.42101
2024-10-13	2.21796	2.43595	2.43767
2024-11-13	2.4141	2.45161	2.45844
2024-12-13	2.441	2.50313	2.51284
2025-01-13	2.49808	2.49859	2.48792
2025-02-12	2.50442	2.51836	2.5368
2025-03-13	2.45183	2.46006	2.45632
2025-04-13	2.41687	2.43861	2.42899
2025-05-13	2.47273	2.46235	2.47674
2025-06-13	2.37467	2.39711	2.24187
2025-07-13	2.37526	2.28426	2.29547
2025-08-13	2.3969	2.41184	2.3616
2025-09-13	2.39861	2.38842	2.41986
2025-10-13	2.41782	2.44847	2.49317
2025-11-13	2.38021	2.43954	2.48693
2025-12-13	2.46077	2.48049	2.49061
2026-01-13	2.43208	2.51568	2.5024
2026-02-12	2.46351	2.5055	2.50832
2026-03-13	2.39459	2.41337	2.37395
2026-04-13	2.4101	2.43628	2.44032
2026-05-13	2.18633	2.45368	2.45171
2026-06-13	2.40685	2.35003	2.37461
2026-07-13	2.44791	2.46124	2.45083
2026-08-13	2.01927	2.32663	2.40104
2026-09-13	2.23918	2.38183	2.29222
2026-10-13	2.44521	2.47371	2.46348
2026-11-13	2.49713	2.56955	2.55019
2026-12-13	2.36099	2.41747	2.50075
2027-01-13	2.47858	2.52177	2.58305
2027-02-12	2.51867	2.56063	2.56012
2027-03-13	2.5607	2.54652	2.52229
2027-04-13	2.48378	2.48749	2.44731
2027-05-13	2.52416	2.52927	2.51029
2027-06-13	2.43807	2.48749	2.52981
2027-07-13	2.28596	2.36088	2.39613
2027-08-13	2.44562	2.33839	2.24509
2027-09-13	2.47627	2.36608	2.32721
2027-10-13	2.53286	2.57919	2.60018
2027-11-13	2.47021	2.5497	2.5262
2027-12-13	2.44503	2.40889	2.51932
2028-01-13	2.52978	2.57043	2.57007
2028-02-12	2.39937	2.45866	2.4536
2028-03-12	2.54035	2.52388	2.52772
2028-04-12	2.47996	2.50036	2.5089
2028-05-12	2.49867	2.51486	2.51935
2028-06-12	2.52253	2.49073	2.50093
2028-07-12	2.5126	2.49222	2.4893
2028-08-12	2.47966	2.48944	2.49434
2028-09-12	2.51492	2.45042	2.46822
2028-10-12	2.55046	2.56043	2.48298
2028-11-12	2.3799	2.5172	2.52603
2028-12-12	2.5707	2.65308	2.6095
2029-01-12	2.53112	2.5627	2.5413
2029-02-11	2.5313	2.5672	2.56152
2029-03-12	2.48975	2.49449	2.48802
2029-04-12	2.51491	2.55172	2.52754
2029-05-12	2.5525	2.5301	2.51684
2029-06-12	2.5329	2.55376	2.53
2029-07-12	2.54299	2.50906	2.49909
2029-08-12	2.54125	2.38005	2.36639
2029-09-12	2.43842	2.33668	2.26618
2029-10-12	2.40101	2.41551	2.39734
2029-11-12	2.51594	2.29363	2.38881
2029-12-12	2.47072	2.53892	2.58041
2030-01-12	2.5015	2.60321	2.56741
2030-02-11	2.60589	2.60388	2.623
2030-03-12	2.59078	2.60465	2.6118
2030-04-12	2.58021	2.56589	2.56944
2030-05-12	2.48694	2.42731	2.41155
2030-06-12	2.45471	2.53728	2.57881
2030-07-12	2.43249	2.43735	2.33637
2030-08-12	2.41602	2.48784	2.50973
2030-09-12	2.54583	2.62179	2.5215
2030-10-12	2.21109	2.31899	2.54705
2030-11-12	2.38419	2.4944	2.52619
2030-12-12	2.47844	2.59888	2.57067
2031-01-12	2.43694	2.41046	2.51095
2031-02-11	2.6597	2.68253	2.68397
2031-03-12	2.6267	2.63049	2.63074
2031-04-12	2.56224	2.58422	2.57188
2031-05-12	2.60871	2.54469	2.58644
2031-06-12	2.53614	2.51518	2.4724
2031-07-12	2.46443	2.51115	2.5472
2031-08-12	2.48189	2.53142	2.42168
2031-09-12	2.48848	2.48143	2.40191
2031-10-12	2.56338	2.63199	2.63675
2031-11-12	2.65786	2.66321	2.62873
2031-12-12	2.5092	2.55176	2.56302
2032-01-12	2.65651	2.61447	2.61076
2032-02-11	2.62621	2.60766	2.61607
2032-03-11	2.65262	2.65863	2.64357
2032-04-11	2.61912	2.61164	2.5753
2032-05-11	2.46968	2.58665	2.56992
2032-06-11	2.57291	2.59878	2.55175
2032-07-11	2.50842	2.45776	2.51368
2032-08-11	2.53744	2.53627	2.53153
2032-09-11	2.52403	2.45732	2.51775
2032-10-11	2.47691	2.58813	2.58262
2032-11-11	2.59805	2.62411	2.63144
2032-12-11	2.57401	2.66295	2.70647
2033-01-11	2.69015	2.69783	2.71355
2033-02-10	2.3532	2.69126	2.69139
2033-03-11	2.65544	2.6427	2.66704
2033-04-11	2.56231	2.60849	2.61149
2033-05-11	2.61839	2.64062	2.63724
2033-06-11	2.61161	2.61006	2.6368
2033-07-11	2.51121	2.66752	2.65725
2033-08-11	2.58806	2.60074	2.53067
2033-09-11	2.54948	2.5833	2.60748
2033-10-11	2.64132	2.66752	2.60573
2033-11-11	2.54234	2.65299	2.61367
2033-12-11	2.59727	2.72759	2.75341
2034-01-11	2.6165	2.72205	2.71657
2034-02-10	2.61224	2.62069	2.46519
2034-03-11	2.64075	2.65482	2.65571
2034-04-11	2.66446	2.65628	2.63367
2034-05-11	2.64812	2.61678	2.6179
2034-06-11	2.43354	2.54894	2.60923
2034-07-11	2.25986	2.53906	2.61179
2034-08-11	2.36485	2.54271	2.58164
2034-09-11	2.5967	2.55464	2.55198
2034-10-11	2.6908	2.70138	2.68213
2034-11-11	2.66904	2.66514	2.62163
2034-12-11	2.67405	2.73476	2.6915
2035-01-11	2.72872	2.77332	2.76097
2035-02-10	2.73159	2.71234	2.73409
2035-03-11	2.67927	2.71397	2.69986
2035-04-11	2.66889	2.69067	2.67706
2035-05-11	2.35799	2.67806	2.6592
2035-06-11	2.59142	2.62906	2.51202
2035-07-11	2.59323	2.53731	2.57825
2035-08-11	2.52532	2.60691	2.60554
2035-09-11	2.69563	2.49548	2.46052
2035-10-11	2.60745	2.65091	2.69169
2035-11-11	2.56181	2.69394	2.73029
2035-12-11	2.62577	2.68872	2.68156
2036-01-11	2.69928	2.65349	2.61153
2036-02-10	2.73697	2.78399	2.7682
2036-03-10	2.7082	2.71842	2.72517
2036-04-10	2.64061	2.68278	2.71226
2036-05-10	2.52446	2.65351	2.61063
2036-06-10	2.50681	2.56686	2.57933
2036-07-10	2.72167	2.67272	2.61543
2036-08-10	2.7174	2.61667	2.59415
2036-09-10	2.47701	2.64688	2.6653
2036-10-10	2.71449	2.55948	2.52514
2036-11-10	2.57457	2.67911	2.7725
2036-12-10	2.64293	2.64897	2.67642
2037-01-10	2.77752	2.80026	2.81403
2037-02-09	2.78276	2.80927	2.78958
2037-03-10	2.64751	2.75534	2.76181
2037-04-10	2.69177	2.68076	2.67679
2037-05-10	2.70065	2.68549	2.67888
2037-06-10	2.74517	2.74843	2.69574
2037-07-10	2.67353	2.53819	2.47432
2037-08-10	2.65614	2.63347	2.58848
2037-09-10	2.49894	2.59124	2.60045
2037-10-10	2.74227	2.7445	2.75105
2037-11-10	2.7308	2.72739	2.75487
2037-12-10	2.73349	2.77192	2.78818
2038-01-10	2.74074	2.77033	2.77938
2038-02-09	2.76449	2.80055	2.76321
2038-03-10	2.71718	2.7407	2.74478
2038-04-10	2.72997	2.62839	2.69967
2038-05-10	2.74279	2.72416	2.73782
2038-06-10	2.54728	2.70945	2.71749
2038-07-10	2.45703	2.66757	2.66271
2038-08-10	2.56209	2.3873	2.48066
2038-09-10	2.63641	2.67811	2.76465
2038-10-10	2.55628	2.65773	2.68967
2038-11-10	2.64344	2.73851	2.76014
2038-12-10	2.72044	2.81939	2.83857
2039-01-10	2.81178	2.84018	2.83013
2039-02-09	2.77691	2.79625	2.79139
2039-03-10	2.78372	2.78718	2.76207
2039-04-10	2.75937	2.79668	2.75067
2039-05-10	2.68025	2.74287	2.72023
2039-06-10	2.68111	2.73097	2.73972
2039-07-10	2.47769	2.56104	2.59833
2039-08-10	2.61943	2.64586	2.70882
2039-09-10	2.40928	2.57085	2.68325
2039-10-10	2.5009	2.6227	2.70736
2039-11-10	2.71978	2.71851	2.75221
2039-12-10	2.67061	2.81419	2.80389
2040-01-10	2.86116	2.86863	2.88751
2040-02-09	2.79686	2.80461	2.81326
2040-03-09	2.80257	2.78597	2.73868
2040-04-09	2.7105	2.7143	2.7171
2040-05-09	2.79815	2.78914	2.74022
2040-06-09	2.52521	2.70249	2.67192
2040-07-09	2.38757	2.56988	2.70238
2040-08-09	2.63971	2.74757	2.7849
2040-09-09	2.84405	2.7493	2.79385
2040-10-09	2.74517	2.73054	2.78796
2040-11-09	2.77869	2.72559	2.73139
2040-12-09	2.7322	2.79733	2.82634
2041-01-09	2.73486	2.70598	2.77742
2041-02-08	2.85255	2.86095	2.8418
2041-03-09	2.7353	2.79807	2.80361
2041-04-09	2.80301	2.82268	2.81904
2041-05-09	2.67409	2.77762	2.76269
2041-06-09	2.81292	2.71711	2.7415
2041-07-09	2.7041	2.69858	2.742
2041-08-09	2.71376	2.73063	2.74421
2041-09-09	2.79445	2.76834	2.77343
2041-10-09	2.4401	2.65422	2.67806
2041-11-09	2.769	2.75616	2.82085
2041-12-09	2.81594	2.83474	2.88493
2042-01-09	2.83457	2.86772	2.84301
2042-02-08	2.82264	2.77216	2.79588
2042-03-09	2.84408	2.82811	2.76852
2042-04-09	2.81923	2.83343	2.83322
2042-05-09	2.69407	2.78257	2.7934
2042-06-09	2.83587	2.82494	2.77155
2042-07-09	2.84836	2.71628	2.68543
2042-08-09	2.75841	2.75849	2.75268
2042-09-09	2.68209	2.52481	2.43803
2042-10-09	2.75291	2.84919	2.83172
2042-11-09	2.71617	2.89062	2.92198
2042-12-09	2.75085	2.74759	2.74811
2043-01-09	2.75328	2.88554	2.87328
2043-02-08	2.91173	2.93478	2.91681
2043-03-09	2.82742	2.87021	2.87363
2043-04-09	2.75514	2.83967	2.78192
2043-05-09	2.85027	2.81974	2.84811
2043-06-09	2.75305	2.76763	2.82493
2043-07-09	2.75519	2.53741	2.69288
2043-08-09	2.81935	2.78745	2.7423
2043-09-09	2.63608	2.82717	2.76175
2043-10-09	2.65353	2.73493	2.8592
2043-11-09	2.73451	2.81502	2.82157
2043-12-09	2.81143	2.89396	2.84199
2044-01-09	2.87376	2.93202	2.89693
2044-02-08	2.85302	2.91353	2.9002
2044-03-08	2.78851	2.85525	2.81376
2044-04-08	2.87386	2.85924	2.8332
2044-05-08	2.88709	2.85521	2.8487
2044-06-08	2.80139	2.82758	2.84069
2044-07-08	2.68171	2.79151	2.70791
2044-08-08	2.76914	2.68094	2.64503
2044-09-08	2.69982	2.73866	2.81886
2044-10-08	2.91441	2.89881	2.87351
2044-11-08	2.87825	2.93069	2.92321
2044-12-08	2.84133	2.84516	2.85214
2045-01-08	2.81401	2.83218	2.85184
2045-02-07	2.84977	2.88362	2.91087
2045-03-08	2.91041	2.92383	2.92472
2045-04-08	2.91101	2.93652	2.90966
2045-05-08	2.80773	2.83815	2.90242
2045-06-08	2.77822	2.78198	2.79806
2045-07-08	2.48285	2.77135	2.74835
2045-08-08	2.79567	2.8331	2.8578
2045-09-08	2.83029	2.62794	2.78426
2045-10-08	2.91641	2.95772	2.95966
2045-11-08	2.81947	2.95795	2.97867
2045-12-08	2.99287	3.04682	3.04459
2046-01-08	2.94913	2.98453	2.97402
2046-02-07	2.90437	2.92683	2.93755
2046-03-08	2.85801	2.93352	2.95095
2046-04-08	2.89096	2.88519	2.89285
2046-05-08	2.892	2.87937	2.85731
2046-06-08	2.91271	2.93571	2.92505
2046-07-08	2.848	2.83597	2.8886
2046-08-08	2.83872	2.86355	2.84101
2046-09-08	2.91258	2.85009	2.86484
2046-10-08	2.81714	2.87973	2.95522
2046-11-08	2.76831	2.96724	2.98353
2046-12-08	2.75893	2.90721	2.91125
2047-01-08	2.95533	2.97046	2.97447
2047-02-07	2.97159	2.9698	3.00525
2047-03-08	2.94399	2.92566	2.9518
2047-04-08	2.92825	2.93601	2.95314
2047-05-08	2.82083	2.90037	2.88587
2047-06-08	2.90234	2.89066	2.93958
2047-07-08	2.76941	2.88577	2.80316
2047-08-08	2.81468	2.79568	2.73497
2047-09-08	2.92039	2.86413	2.72525
2047-10-08	2.80401	2.81978	2.82016
2047-11-08	2.77172	2.8737	2.91663
2047-12-08	2.91476	2.87297	3.01553
2048-01-08	3.02149	3.05716	3.06131
2048-02-07	2.99931	3.00946	3.0102
2048-03-07	2.90989	2.95149	2.94158
2048-04-07	3.0001	2.99128	2.95106
2048-05-07	2.96519	2.98509	2.95615
2048-06-07	2.92115	2.95702	2.94124
2048-07-07	2.8498	2.86762	2.85119
2048-08-07	2.67494	2.81182	2.88346
2048-09-07	2.9731	2.90028	2.94968
2048-10-07	3.04681	3.02991	2.95524
2048-11-07	2.90989	2.88626	2.95254
2048-12-07	2.96939	3.00237	3.02523
2049-01-07	3.00679	3.00688	3.01418
2049-02-06	2.9916	3.02578	3.0329
2049-03-07	2.98725	3.00787	2.98066
2049-04-07	2.91053	2.92823	2.96099
2049-05-07	3.00809	2.97972	2.90311
2049-06-07	2.84383	2.86386	2.9308
2049-07-07	2.71568	2.83132	2.87999
2049-08-07	2.85795	2.86717	2.81404
2049-09-07	2.85592	2.95599	2.97924
2049-10-07	2.85266	2.99042	3.01689
2049-11-07	2.99326	3.06214	3.04732
2049-12-07	2.99455	3.07369	3.07397
2050-01-07	3.02117	3.05562	3.0411
2050-02-06	3.07168	3.08459	3.06731
2050-03-07	3.0054	3.02036	3.00173
2050-04-07	2.99956	2.96152	2.98179
2050-05-07	3.03425	3.01047	3.02882
2050-06-07	2.89361	3.01357	2.99313
2050-07-07	2.95317	2.87846	2.95611
2050-08-07	2.83799	2.87545	2.92596
2050-09-07	2.87697	2.96501	2.9925
2050-10-07	2.93561	3.04352	3.02201
2050-11-07	2.88779	2.97573	3.02624
2050-12-07	2.94016	3.05741	3.05743
2051-01-07 12:00:00	3.08541	3.10853	3.11365
2051-02-06	3.0573	3.06389	3.07099
2051-03-07 12:00:00	3.02255	2.99398	3.04638
2051-04-07	3.0051	3.02118	3.01234
2051-05-07 12:00:00	3.07263	3.0257	3.01807
2051-06-07	2.912	2.96687	2.89902
2051-07-07 12:00:00	2.87443	2.97269	2.94811
2051-08-07 12:00:00	2.70059	2.75234	2.75848
2051-09-07	2.92202	2.99517	2.95888
2051-10-07 12:00:00	3.1033	3.04999	3.09546
2051-11-07	2.97381	2.99074	2.94637
2051-12-07 12:00:00	3.06448	3.12658	3.15151
2052-01-07 12:00:00	3.02394	3.09488	3.10784
2052-02-06	3.08491	3.09992	3.10301
2052-03-06 12:00:00	3.0942	3.11156	3.10579
2052-04-06	3.04569	3.08343	3.05361
2052-05-06 12:00:00	2.94759	3.01482	3.05219
2052-06-06	2.9391	3.10041	3.07053
2052-07-06 12:00:00	2.9951	3.05982	3.02911
2052-08-06 12:00:00	2.98352	2.88616	2.88608
2052-09-06	2.97301	2.98408	2.97253
2052-10-06 12:00:00	3.10617	3.10197	3.09245
2052-11-06	2.9901	3.05686	3.06941
2052-12-06 12:00:00	3.1018	3.1606	3.15368
2053-01-06 12:00:00	3.05702	3.12854	3.10832
2053-02-05	3.05763	3.10724	3.09706
2053-03-06 12:00:00	3.04248	3.09047	3.08368
2053-04-06	3.00414	3.07642	3.07736
2053-05-06 12:00:00	3.0194	3.03961	3.10506
2053-06-06	2.89402	3.009	3.04504
2053-07-06 12:00:00	3.02589	3.00725	3.1271
2053-08-06 12:00:00	2.96224	2.96171	2.96607
2053-09-06	3.05714	3.02394	3.06924
2053-10-06 12:00:00	3.02967	3.01459	2.90566
2053-11-06	2.89742	3.07778	3.11882
2053-12-06 12:00:00	2.93394	3.1017	3.10009
2054-01-06 12:00:00	3.10402	3.14174	3.1248
2054-02-05	3.11947	3.11042	3.12269
2054-03-06 12:00:00	3.01903	3.11848	3.10604
2054-04-06	3.09641	3.06381	3.03566
2054-05-06 12:00:00	2.97513	3.06251	3.02487
2054-06-06	3.03016	2.8847	2.9853
2054-07-06 12:00:00	2.85898	3.04112	3.06056
2054-08-06 12:00:00	2.81715	2.98181	2.99622
2054-09-06	3.07161	3.04821	3.04174
2054-10-06 12:00:00	2.98404	2.94968	2.96882
2054-11-06	3.09977	3.06917	3.03481
2054-12-06 12:00:00	2.99893	3.10384	3.11496
2055-01-06 12:00:00	3.07649	3.14481	3.16256
2055-02-05	3.06059	3.13768	3.1756
2055-03-06 12:00:00	3.16293	3.1387	3.14406
2055-04-06	3.07648	3.08018	3.08135
2055-05-06 12:00:00	3.04935	3.12251	3.08162
2055-06-06	3.04017	3.0734	3.06326
2055-07-06 12:00:00	2.97545	3.03309	3.00653
2055-08-06 12:00:00	3.01874	2.95823	2.92677
2055-09-06	2.95302	2.9038	2.93396
2055-10-06 12:00:00	3.19243	3.18128	3.15778
2055-11-06	2.95428	2.90622	3.03525
2055-12-06 12:00:00	3.12843	3.21332	3.21113
2056-01-06 12:00:00	3.15698	3.19312	3.18884
2056-02-05	3.15066	3.19164	3.16429
2056-03-05 12:00:00	3.10185	3.17813	3.17381
2056-04-05	3.17118	3.16884	3.15254
2056-05-05 12:00:00	3.14572	3.11816	3.10773
2056-06-05	3.04033	3.10907	3.15469
2056-07-05 12:00:00	3.13377	3.09581	2.9795
2056-08-05 12:00:00	3.09987	3.05366	3.04742
2056-09-05	3.18985	3.16093	3.17716
2056-10-05 12:00:00	3.14097	3.18919	3.15644
2056-11-05	3.07299	3.19392	3.17153
2056-12-05 12:00:00	3.10915	3.17065	3.19507
2057-01-05 12:00:00	3.21369	3.229	3.24808
2057-02-04	3.17063	3.18211	3.2137
2057-03-05 12:00:00	3.1633	3.17442	3.12125
2057-04-05	2.89201	3.11716	3.13492
2057-05-05 12:00:00	2.88396	3.13546	3.0825
2057-06-05	3.15523	3.13108	3.16203
2057-07-05 12:00:00	2.9907	3.1273	3.11597
2057-08-05 12:00:00	3.01224	3.03546	3.00519
2057-09-05	3.01882	3.0411	3.0686
2057-10-05 12:00:00	3.1675	3.19202	3.18894
2057-11-05	3.15489	3.12894	3.13885
2057-12-05 12:00:00	3.16473	3.19915	3.24909
2058-01-05 12:00:00	3.19483	3.27237	3.27467
2058-02-04	3.19423	3.21727	3.22098
2058-03-05 12:00:00	3.12189	3.15699	3.13845
2058-04-05	3.06446	3.16964	3.15909
2058-05-05 12:00:00	3.0445	3.09114	3.09107
2058-06-05	3.04855	3.16851	3.06103
2058-07-05 12:00:00	2.89151	3.0769	3.0175
2058-08-05 12:00:00	3.21402	3.19553	3.07849
2058-09-05	3.09176	3.1378	3.14242
2058-10-05 12:00:00	3.1292	3.02823	3.12156
2058-11-05	3.13242	3.15658	3.17275
2058-12-05 12:00:00	3.25418	3.26903	3.28828
2059-01-05 12:00:00	3.1322	3.14539	3.17909
2059-02-04	3.20246	3.21372	3.18935
2059-03-05 12:00:00	3.24535	3.24213	3.23858
2059-04-05	3.2022	3.18419	3.19859
2059-05-05 12:00:00	3.22413	3.17851	3.20834
2059-06-05	3.06261	3.14249	3.09598
2059-07-05 12:00:00	3.03183	3.12775	3.11993
2059-08-05 12:00:00	2.95963	3.08902	3.11668
2059-09-05	3.0829	3.21981	3.23138
2059-10-05 12:00:00	3.20667	3.2494	3.19832
2059-11-05	3.16953	3.19364	3.24038
2059-12-05 12:00:00	3.27808	3.29376	3.30016
2060-01-05 12:00:00	3.20827	3.27021	3.27834
2060-02-04	3.25245	3.23233	3.22402
2060-03-04 12:00:00	3.19044	3.23004	3.21693
2060-04-04	3.21083	3.21821	3.2161
2060-05-04 12:00:00	3.26764	3.24904	3.20936
2060-06-04	3.18939	3.19889	3.2122
2060-07-04 12:00:00	3.21195	3.20853	3.19804
2060-08-04 12:00:00	3.16652	3.08138	3.06868
2060-09-04	3.239	3.24769	3.22794
2060-10-04 12:00:00	3.1836	3.21119	3.21515
2060-11-04	3.03655	3.23249	3.27168
2060-12-04 12:00:00	3.13522	3.26712	3.27754
2061-01-04 12:00:00	3.25065	3.2066	3.28481
2061-02-03	3.26425	3.26616	3.25918
2061-03-04 12:00:00	3.2209	3.27092	3.26725
2061-04-04	3.19683	3.2154	3.18245
2061-05-04 12:00:00	3.20023	3.18856	3.24841
2061-06-04	3.17116	3.20088	3.18789
2061-07-04 12:00:00	3.00629	2.99226	3.06632
2061-08-04 12:00:00	3.04893	3.14653	3.18291
2061-09-04	3.21131	3.22164	3.20307
2061-10-04 12:00:00	2.97068	3.22664	3.27466
2061-11-04	3.16533	3.23544	3.25771
2061-12-04 12:00:00	3.27679	3.30069	3.28201
2062-01-04 12:00:00	3.32471	3.3611	3.35536
2062-02-03	3.26327	3.31653	3.31234
2062-03-04 12:00:00	3.23684	3.28822	3.28303
2062-04-04	3.22549	3.28279	3.2589
2062-05-04 12:00:00	3.19013	3.26258	3.25062
2062-06-04	3.23771	3.26233	3.24051
2062-07-04 12:00:00	3.27506	3.27723	3.27114
2062-08-04 12:00:00	3.08177	3.07714	3.06901
2062-09-04	3.11855	3.18904	3.15429
2062-10-04 12:00:00	3.19244	3.04102	3.15471
2062-11-04	3.23054	3.25238	3.20642
2062-12-04 12:00:00	3.26442	3.28688	3.30335
2063-01-04 12:00:00	3.28029	3.23951	3.31868
2063-02-03	3.33736	3.35691	3.34467
2063-03-04 12:00:00	3.31016	3.30782	3.32028
2063-04-04	3.24797	3.21261	3.23905
2063-05-04 12:00:00	3.25479	3.29404	3.25966
2063-06-04	3.27522	3.11625	3.2035
2063-07-04 12:00:00	3.15572	3.19118	3.03329
2063-08-04 12:00:00	3.21792	3.17802	3.00075
2063-09-04	3.20347	3.22618	3.20077
2063-10-04 12:00:00	3.30183	3.16552	3.2147
2063-11-04	3.15437	3.20361	3.15841
2063-12-04 12:00:00	3.27623	3.31961	3.32031
2064-01-04 12:00:00	3.28311	3.31692	3.35634
2064-02-03	3.32832	3.37542	3.36326
2064-03-03 12:00:00	3.30726	3.33606	3.33732
2064-04-03	3.21911	3.21543	3.22198
2064-05-03 12:00:00	3.22786	3.30937	3.28898
2064-06-03	3.22867	3.26283	3.26815
2064-07-03 12:00:00	3.20976	3.18084	3.22614
2064-08-03 12:00:00	3.16241	2.91106	3.04214
2064-09-03	3.2854	3.29435	3.26003
2064-10-03 12:00:00	3.26003	3.35801	3.36735
2064-11-03	3.18524	3.2839	3.26932
2064-12-03 12:00:00	3.38895	3.41366	3.41085
2065-01-03 12:00:00	3.32971	3.37831	3.33864
2065-02-02	3.36934	3.38004	3.3811
2065-03-03 12:00:00	3.30433	3.31483	3.32486
2065-04-03	3.33966	3.33646	3.32733
2065-05-03 12:00:00	3.30254	3.33046	3.35344
2065-06-03	3.30713	3.34359	3.35407
2065-07-03 12:00:00	3.32564	3.28225	3.28584
2065-08-03 12:00:00	3.33506	3.32751	3.28399
2065-09-03	3.25694	3.14	3.16547
2065-10-03 12:00:00	3.17277	3.28609	3.33127
2065-11-03	3.30198	3.37031	3.35822
2065-12-03 12:00:00	3.29493	3.30091	3.36459
2066-01-03 12:00:00	3.36222	3.35229	3.35704
2066-02-02	3.38573	3.39842	3.35988
2066-03-03 12:00:00	3.32473	3.36061	3.3644
2066-04-03	3.32635	3.32942	3.30334
2066-05-03 12:00:00	3.24606	3.2922	3.32064
2066-06-03	3.24946	3.30838	3.33308
2066-07-03 12:00:00	3.25382	3.20917	3.31789
2066-08-03 12:00:00	3.14566	3.13018	3.31161
2066-09-03	3.28247	3.27059	3.32107
2066-10-03 12:00:00	3.25784	3.17866	3.33168
2066-11-03	3.34616	3.43182	3.44458
2066-12-03 12:00:00	3.1977	3.38351	3.39176
2067-01-03 12:00:00	3.41957	3.43991	3.44145
2067-02-02	3.42084	3.42109	3.40906
2067-03-03 12:00:00	3.38557	3.39116	3.38495
2067-04-03	3.33399	3.3254	3.27928
2067-05-03 12:00:00	3.28326	3.33716	3.33889
2067-06-03	3.27891	3.32791	3.37071
2067-07-03 12:00:00	2.9591	3.24037	3.19598
2067-08-03 12:00:00	3.28318	3.29955	3.31547
2067-09-03	3.38483	3.38595	3.40856
2067-10-03 12:00:00	3.12264	3.193	3.28195
2067-11-03	3.34405	3.37356	3.3901
2067-12-03 12:00:00	3.16933	3.31041	3.34696
2068-01-03 12:00:00	3.16466	3.40596	3.40881
2068-02-02	3.43453	3.43538	3.44456
2068-03-02 12:00:00	3.41416	3.41144	3.4161
2068-04-02	3.34405	3.38639	3.30697
2068-05-02 12:00:00	3.20681	3.32376	3.26736
2068-06-02	3.3767	3.40454	3.44108
2068-07-02 12:00:00	3.41999	3.37527	3.315
2068-08-02 12:00:00	3.08778	3.1812	3.27177
2068-09-02	3.09855	3.35304	3.22222
2068-10-02 12:00:00	3.38082	3.37024	3.38149
2068-11-02	3.38537	3.45897	3.43465
2068-12-02 12:00:00	3.23369	3.32765	3.39151
2069-01-02 12:00:00	3.24714	3.1306	3.2411
2069-02-01	3.38812	3.43334	3.41477
2069-03-02 12:00:00	3.42824	3.44061	3.40529
2069-04-02	3.41933	3.41728	3.39743
2069-05-02 12:00:00	3.3844	3.37839	3.41667
2069-06-02	3.10418	3.35451	3.32361
2069-07-02 12:00:00	2.90916	3.15604	3.20608
2069-08-02 12:00:00	3.23271	3.38728	3.34916
2069-09-02	3.30703	3.30133	3.22266
2069-10-02 12:00:00	3.19405	3.29267	3.26349
2069-11-02	3.40507	3.47684	3.49264
2069-12-02 12:00:00	3.38854	3.48634	3.51367
2070-01-02 12:00:00	3.48585	3.49525	3.50121
2070-02-01	3.42977	3.43532	3.4318
2070-03-02 12:00:00	3.44739	3.4584	3.43925
2070-04-02	3.40909	3.38207	3.34203
2070-05-02 12:00:00	3.24979	3.41097	3.40014
2070-06-02	2.84278	3.29174	3.25905
2070-07-02 12:00:00	3.3435	3.34499	3.13617
2070-08-02 12:00:00	3.08976	3.19049	3.17807
2070-09-02	3.32851	3.40135	3.40297
2070-10-02 12:00:00	3.47065	3.35699	3.42871
2070-11-02	3.47153	3.46608	3.43326
2070-12-02 12:00:00	3.42666	3.46918	3.50507
2071-01-02 12:00:00	3.38682	3.43836	3.45731
2071-02-01	3.51253	3.50506	3.48254
2071-03-02 12:00:00	3.49703	3.51283	3.50672
2071-04-02	3.46293	3.47726	3.46772
2071-05-02 12:00:00	3.40407	3.46541	3.41456
2071-06-02	3.34649	3.43685	3.41622
2071-07-02 12:00:00	3.14134	3.387	3.28261
2071-08-02 12:00:00	3.37014	3.43197	3.41976
2071-09-02	3.46668	3.38952	3.38706
2071-10-02 12:00:00	3.44996	3.45796	3.38379
2071-11-02	3.39086	3.42058	3.42003
2071-12-02 12:00:00	3.3507	3.47823	3.50612
2072-01-02 12:00:00	3.49753	3.53377	3.53746
2072-02-01	3.5025	3.53178	3.54719
2072-03-01 12:00:00	3.47866	3.4884	3.45917
2072-04-01	3.32879	3.40513	3.43671
2072-05-01 12:00:00	3.26859	3.38948	3.41952
2072-06-01	3.51261	3.50347	3.4918
2072-07-01 12:00:00	3.43463	3.46885	3.42759
2072-08-01 12:00:00	3.4345	3.42384	3.37165
2072-09-01	3.34801	3.29075	3.24278
2072-10-01 12:00:00	3.50916	3.46148	3.48281
2072-11-01	3.50838	3.52641	3.54908
2072-12-01 12:00:00	3.55284	3.56426	3.53422
2073-01-01 12:00:00	3.49012	3.52501	3.53514
2073-01-31	3.52333	3.53704	3.53181
2073-03-01 12:00:00	3.35027	3.47451	3.50603
2073-04-01	3.47486	3.48841	3.46735
2073-05-01 12:00:00	3.47624	3.47327	3.4493
2073-06-01	3.38437	3.50283	3.53238
2073-07-01 12:00:00	3.29274	3.29969	3.0411
2073-08-01 12:00:00	3.51249	3.15692	3.35024
2073-09-01	3.34502	3.42724	3.37829
2073-10-01 12:00:00	3.4004	3.33128	3.49519
2073-11-01	3.44033	3.48428	3.44287
2073-12-01 12:00:00	3.52174	3.56614	3.57306
2074-01-01 12:00:00	3.45574	3.52355	3.56891
2074-01-31	3.57363	3.58094	3.56812
2074-03-01 12:00:00	3.49712	3.50262	3.52743
2074-04-01	3.54314	3.46774	3.4994
2074-05-01 12:00:00	3.40563	3.51323	3.51573
2074-06-01	3.09721	3.41883	3.30341
2074-07-01 12:00:00	3.4602	3.38196	3.42536
2074-08-01 12:00:00	3.24084	3.36749	3.26429
2074-09-01	3.50805	3.52691	3.43995
2074-10-01 12:00:00	3.51931	3.54227	3.50173
2074-11-01	3.36813	3.49421	3.52281
2074-12-01 12:00:00	3.53796	3.59139	3.60929
2075-01-01 12:00:00	3.56483	3.5884	3.60087
2075-01-31	3.57412	3.58611	3.57613
2075-03-01 12:00:00	3.56373	3.57726	3.56516
2075-04-01	3.52492	3.53204	3.51107
2075-05-01 12:00:00	3.46896	3.5038	3.48262
2075-06-01	3.5434	3.55812	3.55335
2075-07-01 12:00:00	3.2927	3.46513	3.52594
2075-08-01 12:00:00	3.40622	3.53636	3.44133
2075-09-01	3.41645	3.48836	3.47982
2075-10-01 12:00:00	3.4967	3.57027	3.57142
2075-11-01	3.48534	3.51311	3.52694
2075-12-01 12:00:00	3.5312	3.603	3.63507
2076-01-01 12:00:00	3.54322	3.57549	3.58834
2076-01-31	3.56311	3.58351	3.6003
2076-02-29 12:00:00	3.47836	3.53139	3.51715
2076-03-31	3.55177	3.5243	3.52277
2076-04-30 12:00:00	3.43147	3.5364	3.50322
2076-05-31	3.48066	3.45902	3.48236
2076-06-30 12:00:00	3.49778	3.56131	3.49334
2076-07-31 12:00:00	3.3916	3.39863	3.34374
2076-08-31	3.44177	3.44757	3.40366
2076-09-30 12:00:00	3.49781	3.29329	3.46899
2076-10-31	3.59584	3.61873	3.6182
2076-11-30 12:00:00	3.52422	3.55523	3.58957
2076-12-31 12:00:00	3.56868	3.58862	3.60249
2077-01-30	3.5839	3.56122	3.60281
2077-02-28 12:00:00	3.52056	3.58146	3.56431
2077-03-31	3.59702	3.60832	3.60578
2077-04-30 12:00:00	3.55407	3.5547	3.51764
2077-05-31	3.58099	3.56493	3.59955
2077-06-30 12:00:00	3.56944	3.49354	3.48103
2077-07-31 12:00:00	3.52929	3.53667	3.53205
2077-08-31	3.55215	3.53487	3.57563
2077-09-30 12:00:00	3.56117	3.54669	3.4867
2077-10-31	3.56618	3.50771	3.53536
2077-11-30 12:00:00	3.57273	3.61973	3.60783
2077-12-31 12:00:00	3.50915	3.61844	3.60518
2078-01-30	3.58167	3.53799	3.58006
2078-02-28 12:00:00	3.57419	3.58183	3.55456
2078-03-31	3.59924	3.59522	3.57177
2078-04-30 12:00:00	3.51257	3.57974	3.56499
2078-05-31	3.24752	3.40933	3.34078
2078-06-30 12:00:00	3.50722	3.54859	3.44053
2078-07-31 12:00:00	3.23952	3.32009	3.24773
2078-08-31	3.44018	3.25302	3.03695
2078-09-30 12:00:00	3.30211	3.55797	3.56594
2078-10-31	3.5407	3.62572	3.62662
2078-11-30 12:00:00	3.58975	3.61737	3.63881
2078-12-31 12:00:00	3.64613	3.67332	3.68634
2079-01-30	3.6272	3.6135	3.6282
2079-02-28 12:00:00	3.589	3.58427	3.60287
2079-03-31	3.55704	3.59955	3.56574
2079-04-30 12:00:00	3.32807	3.54885	3.52021
2079-05-31	3.62455	3.58801	3.58648
2079-06-30 12:00:00	3.4884	3.58915	3.55844
2079-07-31 12:00:00	3.35222	3.43038	3.45925
2079-08-31	3.58175	3.62419	3.60153
2079-09-30 12:00:00	3.5882	3.54411	3.60476
2079-10-31	3.49939	3.55128	3.63013
2079-11-30 12:00:00	3.55572	3.57752	3.5431
2079-12-31 12:00:00	3.64075	3.65093	3.66246
2080-01-30	3.55932	3.5677	3.64655
2080-02-28 12:00:00	3.59351	3.61797	3.6157
2080-03-30	3.57336	3.60284	3.58417
2080-04-29 12:00:00	3.54874	3.61596	3.58008
2080-05-30	3.51454	3.57309	3.47652
2080-06-29 12:00:00	3.55809	3.60151	3.56797
2080-07-30 12:00:00	3.44015	3.42118	3.45123
2080-08-30	2.62647	3.56781	3.5218
2080-09-29 12:00:00	3.63146	3.55333	3.57513
2080-10-30	3.51454	3.61031	3.65547
2080-11-29 12:00:00	3.59797	3.65164	3.69953
2080-12-30 12:00:00	3.55306	3.61928	3.65618
2081-01-29	3.6523	3.6425	3.65031
2081-02-27 12:00:00	3.59203	3.63262	3.61427
2081-03-30	3.65024	3.64534	3.64328
2081-04-29 12:00:00	3.64599	3.62647	3.61955
2081-05-30	3.57449	3.39032	3.4589
2081-06-29 12:00:00	3.54727	3.62747	3.55676
2081-07-30 12:00:00	3.44883	3.49451	3.56815
2081-08-30	3.5496	3.57421	3.45343
2081-09-29 12:00:00	3.57637	3.59875	3.62069
2081-10-30	3.24671	3.30886	3.5457
2081-11-29 12:00:00	3.53241	3.66928	3.69436
2081-12-30 12:00:00	3.62564	3.66054	3.68134
2082-01-29	3.61398	3.61155	3.64832
2082-02-27 12:00:00	3.6548	3.66643	3.68019
2082-03-30	3.6478	3.63456	3.61162
2082-04-29 12:00:00	3.62769	3.67221	3.63187
2082-05-30	3.21808	3.61646	3.6291
2082-06-29 12:00:00	3.44595	3.54346	3.51512
2082-07-30 12:00:00	3.59278	3.50255	3.54167
2082-08-30	3.49069	3.59302	3.64778
2082-09-29 12:00:00	3.62388	3.68003	3.56389
2082-10-30	3.56688	3.65842	3.63828
2082-11-29 12:00:00	3.66686	3.7116	3.69578
2082-12-30 12:00:00	3.58018	3.70303	3.70452
2083-01-29	3.62666	3.68332	3.6818
2083-02-27 12:00:00	3.6867	3.68861	3.67598
2083-03-30	3.67439	3.62625	3.67185
2083-04-29 12:00:00	3.63321	3.6648	3.64045
2083-05-30	3.48791	3.60558	3.64867
2083-06-29 12:00:00	3.11576	3.58448	3.66464
2083-07-30 12:00:00	3.51077	3.49876	3.56337
2083-08-30	3.48845	3.61797	3.60883
2083-09-29 12:00:00	3.69019	3.70544	3.6843
2083-10-30	3.51584	3.69279	3.5927
2083-11-29 12:00:00	3.57174	3.68676	3.73385
2083-12-30 12:00:00	3.62879	3.68471	3.70699
2084-01-29	3.65781	3.6774	3.65319
2084-02-27 12:00:00	3.67177	3.72274	3.73693
2084-03-29	3.61152	3.64169	3.64853
2084-04-28 12:00:00	3.63717	3.54168	3.58758
2084-05-29	3.56336	3.6047	3.58995
2084-06-28 12:00:00	3.4321	3.55415	3.43452
2084-07-29 12:00:00	3.68938	3.6656	3.62271
2084-08-29	3.6145	3.57798	3.67543
2084-09-28 12:00:00	3.37624	3.58514	3.64434
2084-10-29	3.66218	3.64966	3.72076
2084-11-28 12:00:00	3.60043	3.72099	3.75938
2084-12-29 12:00:00	3.65665	3.6982	3.72857
2085-01-28	3.68225	3.67927	3.71352
2085-02-26 12:00:00	3.69314	3.69114	3.69651
2085-03-29	3.52242	3.66991	3.65344
2085-04-28 12:00:00	3.69871	3.70229	3.66387
2085-05-29	3.3112	3.60762	3.58767
2085-06-28 12:00:00	3.60958	3.68191	3.6536
2085-07-29 12:00:00	3.63058	3.59056	3.46593
2085-08-29	3.65368	3.66755	3.63687
2085-09-28 12:00:00	3.68902	3.70849	3.65769
2085-10-29	3.71257	3.6982	3.74254
2085-11-28 12:00:00	3.53886	3.66453	3.67827
2085-12-29 12:00:00	3.72073	3.74177	3.69482
2086-01-28	3.73589	3.7472	3.7212
2086-02-26 12:00:00	3.63691	3.68368	3.67417
2086-03-29	3.66214	3.69625	3.66671
2086-04-28 12:00:00	3.53502	3.61466	3.64378
2086-05-29	3.51715	3.63382	3.59867
2086-06-28 12:00:00	3.46153	3.62068	3.65389
2086-07-29 12:00:00	3.65197	3.67197	3.67474
2086-08-29	3.66835	3.61313	3.67048
2086-09-28 12:00:00	3.65612	3.67604	3.67135
2086-10-29	3.74949	3.73253	3.76368
2086-11-28 12:00:00	3.65541	3.71031	3.72492
2086-12-29 12:00:00	3.7351	3.76015	3.74979
2087-01-28	3.70927	3.75008	3.73506
2087-02-26 12:00:00	3.77648	3.77003	3.7803
2087-03-29	3.68564	3.70452	3.67165
2087-04-28 12:00:00	3.59306	3.68581	3.68064
2087-05-29	3.76691	3.74853	3.76111
2087-06-28 12:00:00	3.69557	3.66616	3.60043
2087-07-29 12:00:00	3.42035	3.54597	3.5604
2087-08-29	3.74345	3.68722	3.69053
2087-09-28 12:00:00	3.74476	3.7532	3.70109
2087-10-29	3.68928	3.73255	3.72023
2087-11-28 12:00:00	3.64172	3.78103	3.79814
2087-12-29 12:00:00	3.58541	3.66689	3.71068
2088-01-28	3.7277	3.75233	3.75258
2088-02-26 12:00:00	3.69644	3.74738	3.72761
2088-03-28	3.56997	3.70707	3.69314
2088-04-27 12:00:00	3.74696	3.7462	3.7466
2088-05-28	3.68249	3.73311	3.70186
2088-06-27 12:00:00	3.44946	3.6257	3.65097
2088-07-28 12:00:00	3.66608	3.61293	3.67763
2088-08-28	3.75702	3.74683	3.77082
2088-09-27 12:00:00	3.69284	3.58612	3.64499
2088-10-28	3.70336	3.73723	3.74592
2088-11-27 12:00:00	3.78107	3.78739	3.79721
2088-12-28 12:00:00	3.74614	3.77547	3.79051
2089-01-27	3.79901	3.80689	3.80462
2089-02-25 12:00:00	3.69652	3.73199	3.70093
2089-03-28	3.7677	3.76686	3.75348
2089-04-27 12:00:00	3.72709	3.74378	3.74591
2089-05-28	3.7595	3.74033	3.67635
2089-06-27 12:00:00	3.28078	3.59048	3.44608
2089-07-28 12:00:00	3.59232	3.68371	3.54221
2089-08-28	3.65062	3.70158	3.66008
2089-09-27 12:00:00	3.76217	3.75237	3.71892
2089-10-28	3.67213	3.73986	3.71858
2089-11-27 12:00:00	3.68839	3.74335	3.78063
2089-12-28 12:00:00	3.76493	3.75479	3.77556
2090-01-27	3.76346	3.75903	3.73762
2090-02-25 12:00:00	3.694	3.68657	3.73893
2090-03-28	3.69889	3.69161	3.70848
2090-04-27 12:00:00	3.7749	3.76386	3.75744
2090-05-28	3.55166	3.66363	3.71669
2090-06-27 12:00:00	3.63625	3.67254	3.68885
2090-07-28 12:00:00	3.41524	3.47823	3.57749
2090-08-28	3.67594	3.75028	3.73922
2090-09-27 12:00:00	3.75781	3.67285	3.70273
2090-10-28	3.74062	3.74246	3.72229
2090-11-27 12:00:00	3.62555	3.71266	3.82541
2090-12-28 12:00:00	3.812	3.77336	3.82125
2091-01-27	3.75587	3.75327	3.79544
2091-02-25 12:00:00	3.78016	3.80194	3.77619
2091-03-28	3.78628	3.79876	3.81458
2091-04-27 12:00:00	3.7456	3.66129	3.6979
2091-05-28	3.67441	3.72599	3.78465
2091-06-27 12:00:00	3.65161	3.68662	3.73378
2091-07-28 12:00:00	3.64678	3.73188	3.7247
2091-08-28	3.6454	3.55131	3.39586
2091-09-27 12:00:00	3.59317	3.68865	3.78725
2091-10-28	3.75281	3.79296	3.80919
2091-11-27 12:00:00	3.60775	3.72289	3.78679
2091-12-28 12:00:00	3.81335	3.79949	3.79956
2092-01-27	3.76174	3.79398	3.77562
2092-02-25 12:00:00	3.80573	3.80529	3.80557
2092-03-27	3.77657	3.79147	3.76525
2092-04-26 12:00:00	3.6899	3.75388	3.7333
2092-05-27	3.72074	3.76001	3.77963
2092-06-26 12:00:00	3.6492	3.6123	3.65258
2092-07-27 12:00:00	3.67384	3.76976	3.76074
2092-08-27	3.44279	3.55249	3.47794
2092-09-26 12:00:00	3.5952	3.73796	3.70319
2092-10-27	3.7115	3.78682	3.83112
2092-11-26 12:00:00	3.71847	3.6861	3.82136
2092-12-27 12:00:00	3.71917	3.74597	3.77852
2093-01-26	3.46297	3.78587	3.8216
2093-02-24 12:00:00	3.79805	3.83021	3.83227
2093-03-27	3.79803	3.78346	3.7824
2093-04-26 12:00:00	3.79082	3.7479	3.80067
2093-05-27	3.67207	3.75204	3.69346
2093-06-26 12:00:00	3.53355	3.56065	3.49091
2093-07-27 12:00:00	3.67233	3.74949	3.73417
2093-08-27	3.67116	3.56868	3.56894
2093-09-26 12:00:00	3.80816	3.83048	3.80843
2093-10-27	3.77484	3.74928	3.71982
2093-11-26 12:00:00	3.73369	3.78384	3.79785
2093-12-27 12:00:00	3.81701	3.83025	3.88318
2094-01-26	3.79434	3.79761	3.80999
2094-02-24 12:00:00	3.81001	3.82307	3.80204
2094-03-27	3.81668	3.81048	3.80273
2094-04-26 12:00:00	3.73493	3.78789	3.77343
2094-05-27	3.80407	3.82554	3.83524
2094-06-26 12:00:00	3.51198	3.45242	3.59209
2094-07-27 12:00:00	3.6868	3.72887	3.57429
2094-08-27	3.75974	3.75126	3.59545
2094-09-26 12:00:00	3.77834	3.73745	3.64309
2094-10-27	3.72939	3.68099	3.80304
2094-11-26 12:00:00	3.67756	3.83954	3.87274
2094-12-27 12:00:00	3.84324	3.88738	3.88098
2095-01-26	3.79654	3.79718	3.8295
2095-02-24 12:00:00	3.79124	3.79748	3.77943
2095-03-27	3.80918	3.82159	3.79417
2095-04-26 12:00:00	3.82048	3.76468	3.79639
2095-05-27	3.74657	3.77942	3.79452
2095-06-26 12:00:00	3.6904	3.7547	3.78912
2095-07-27 12:00:00	3.64923	3.80355	3.83306
2095-08-27	3.67701	3.68497	3.60582
2095-09-26 12:00:00	3.64572	3.70463	3.6661
2095-10-27	3.66487	3.73426	3.73751
2095-11-26 12:00:00	3.81733	3.80296	3.83193
2095-12-27 12:00:00	3.74003	3.6925	3.8479
2096-01-26	3.84861	3.82486	3.84361
2096-02-24 12:00:00	3.83004	3.86684	3.86736
2096-03-26	3.80903	3.79642	3.76298
2096-04-25 12:00:00	3.79984	3.81366	3.82349
2096-05-26	3.77489	3.71431	3.73733
2096-06-25 12:00:00	3.51478	3.71407	3.70199
2096-07-26 12:00:00	3.5706	3.739	3.67242
2096-08-26	3.85247	3.77825	3.77251
2096-09-25 12:00:00	3.77836	3.71546	3.68993
2096-10-26	3.85158	3.77637	3.82487
2096-11-25 12:00:00	3.81517	3.82756	3.85837
2096-12-26 12:00:00	3.86969	3.87995	3.88883
2097-01-25	3.88108	3.88044	3.84943
2097-02-23 12:00:00	3.86873	3.86921	3.87366
2097-03-26	3.85492	3.78136	3.79035
2097-04-25 12:00:00	3.69734	3.80307	3.80473
2097-05-26	3.78175	3.80992	3.79493
2097-06-25 12:00:00	3.63077	3.79136	3.82225
2097-07-26 12:00:00	3.67516	3.74181	3.70635
2097-08-26	3.83649	3.83162	3.79232
2097-09-25 12:00:00	3.88007	3.88067	3.84706
2097-10-26	3.76844	3.77801	3.72137
2097-11-25 12:00:00	3.75349	3.844	3.87278
2097-12-26 12:00:00	3.81771	3.89512	3.91398
2098-01-25	3.82531	3.87024	3.83796
2098-02-23 12:00:00	3.83102	3.85119	3.85802
2098-03-26	3.6949	3.82145	3.81528
2098-04-25 12:00:00	3.59511	3.77535	3.79159
2098-05-26	3.83591	3.83304	3.68548
2098-06-25 12:00:00	3.80275	3.88721	3.89161
2098-07-26 12:00:00	3.7287	3.71765	3.65965
2098-08-26	3.71749	3.58641	3.57254
2098-09-25 12:00:00	3.77196	3.83599	3.83527
2098-10-26	3.78619	3.86351	3.84084
2098-11-25 12:00:00	3.87046	3.87866	3.84312
2098-12-26 12:00:00	3.78755	3.85879	3.84955
2099-01-25	3.88458	3.88666	3.87421
2099-02-23 12:00:00	3.80097	3.86068	3.79805
2099-03-26	3.77762	3.78913	3.56623
2099-04-25 12:00:00	3.69361	3.76547	3.83563
2099-05-26	3.77336	3.70638	3.70764
2099-06-25 12:00:00	3.73449	3.78577	3.75459
2099-07-26 12:00:00	3.28706	3.67286	3.71032
2099-08-26	3.68547	3.63162	3.7028
2099-09-25 12:00:00	3.89087	3.89204	3.90364
2099-10-26	3.74286	3.73812	3.77772
2099-11-25 12:00:00	3.77928	3.88294	3.84914

## Sheet: Table SF9
Time	East Coast	Pearl River Delta	West Coast
2015-01-16	12.6835	12.5731	12.5495
2015-02-15	12.6659	12.7193	12.7351
2015-03-16	12.6037	12.7238	12.6811
2015-04-16	12.7704	12.6669	12.5895
2015-05-16	12.7486	12.5225	12.346
2015-06-16	12.4017	12.5658	12.7062
2015-07-16	11.2189	12.6368	12.518
2015-08-16	11.5804	11.782	11.6987
2015-09-16	11.8049	12.279	12.0781
2015-10-16	12.6812	12.3475	12.3627
2015-11-16	12.2178	12.7984	12.7216
2015-12-16	12.4358	12.9011	12.8571
2016-01-16	12.6299	12.9795	13.0166
2016-02-15	12.9709	12.8857	13.0418
2016-03-15	12.905	12.8286	12.8546
2016-04-15	12.6293	12.6543	12.7277
2016-05-15	12.6925	12.6534	12.665
2016-06-15	12.7221	12.6878	12.8274
2016-07-15	12.7632	12.5557	12.4495
2016-08-15	11.5751	12.2169	12.2362
2016-09-15	12.7544	12.5866	12.4496
2016-10-15	12.308	12.1979	12.6247
2016-11-15	12.4697	12.9069	12.8574
2016-12-15	12.9921	13.248	13.2014
2017-01-15	12.6187	12.9776	13.0275
2017-02-14	12.9334	13.0766	12.9558
2017-03-15	12.7092	12.6579	12.7967
2017-04-15	12.8425	12.7211	12.6777
2017-05-15	12.395	12.7328	12.703
2017-06-15	12.3888	12.8124	12.9764
2017-07-15	12.1425	12.0524	12.3526
2017-08-15	12.2563	12.5369	12.1877
2017-09-15	12.5709	12.4772	12.3389
2017-10-15	13.1796	13.168	13.1441
2017-11-15	12.6918	12.6458	12.8429
2017-12-15	12.4918	12.9814	13.0199
2018-01-15	13.0457	13.2339	13.1748
2018-02-14	13.1194	13.0874	13.0801
2018-03-15	12.892	12.8999	12.9016
2018-04-15	13.0713	12.9723	13.0001
2018-05-15	12.7003	12.7561	12.6651
2018-06-15	12.2095	12.3881	12.5535
2018-07-15	12.359	12.4909	12.3525
2018-08-15	11.6464	12.2343	12.4702
2018-09-15	12.1803	12.8006	12.6677
2018-10-15	12.9948	12.8706	12.9866
2018-11-15	12.87	12.9645	13.0715
2018-12-15	12.4882	12.7801	12.867
2019-01-15	12.8696	12.0143	12.6771
2019-02-14	12.9108	13.1872	13.2283
2019-03-15	13.1554	13.1331	13.0733
2019-04-15	13.0601	12.9503	12.6061
2019-05-15	13.0089	13.0657	13.0383
2019-06-15	12.5351	12.6589	12.0653
2019-07-15	12.5775	12.6013	12.3395
2019-08-15	12.1215	13.0187	12.6441
2019-09-15	12.6109	12.6547	12.3263
2019-10-15	12.9501	12.8353	12.8313
2019-11-15	12.5902	12.9462	12.9529
2019-12-15	12.7756	13.208	13.2566
2020-01-15	13.3077	13.4142	13.5051
2020-02-14	13.1673	13.2267	13.2991
2020-03-14	13.2782	13.2845	13.3212
2020-04-14	12.824	12.7899	12.759
2020-05-14	12.737	13.022	12.7917
2020-06-14	13.0636	13.0993	13.0605
2020-07-14	12.5229	12.777	12.967
2020-08-14	12.8459	12.7627	12.9089
2020-09-14	12.9084	12.8864	13.0092
2020-10-14	13.0697	13.0402	13.0579
2020-11-14	12.9974	13.4738	13.5452
2020-12-14	12.9719	13.4976	13.5709
2021-01-14	13.4457	13.4964	13.5043
2021-02-13	13.5746	13.5618	13.5293
2021-03-14	13.4756	13.3898	13.348
2021-04-14	13.1916	13.0818	13.0786
2021-05-14	13.4363	13.3229	13.3122
2021-06-14	13.2155	13.1592	13.1023
2021-07-14	12.4509	12.7486	12.7054
2021-08-14	12.6116	13.1405	13.1586
2021-09-14	13.159	12.9164	13.226
2021-10-14	13.0723	13.3483	13.1364
2021-11-14	11.982	12.3142	13.2205
2021-12-14	12.6757	13.5753	13.8016
2022-01-14	13.0918	12.8153	13.2307
2022-02-13	13.5216	13.4896	13.4984
2022-03-14	13.1812	13.3447	13.5142
2022-04-14	13.2004	13.3251	13.4344
2022-05-14	13.3491	13.3175	13.3155
2022-06-14	13.1529	13.3408	13.2833
2022-07-14	12.7749	12.6434	12.8022
2022-08-14	12.9155	13.0502	13.0062
2022-09-14	13.1345	12.6876	12.9452
2022-10-14	13.1974	12.5585	12.3797
2022-11-14	13.4352	13.6454	13.647
2022-12-14	13.415	13.7455	13.7314
2023-01-14	13.6225	13.7812	13.8425
2023-02-13	13.4574	13.7658	13.6938
2023-03-14	13.4538	13.5182	13.5146
2023-04-14	13.6186	13.5555	13.3989
2023-05-14	13.1765	13.2391	13.1759
2023-06-14	13.0094	13.3806	13.4471
2023-07-14	12.8156	12.9202	13.0314
2023-08-14	12.9405	12.8986	12.8269
2023-09-14	12.8273	12.6825	12.981
2023-10-14	12.985	13.2684	13.4
2023-11-14	12.3442	12.8296	13.4531
2023-12-14	13.7628	13.7805	13.6494
2024-01-14	13.6903	13.9155	13.7428
2024-02-13	13.8015	13.9131	13.9318
2024-03-13	13.7336	13.8771	13.9505
2024-04-13	13.1063	13.3144	13.3419
2024-05-13	13.4179	13.5217	13.5543
2024-06-13	13.2305	13.0637	12.9938
2024-07-13	13.2237	13.3208	12.8754
2024-08-13	12.7405	13.1099	13.0039
2024-09-13	13.2759	13.314	13.413
2024-10-13	12.6577	13.5549	13.5729
2024-11-13	13.4662	13.636	13.6734
2024-12-13	13.6105	13.8801	13.9317
2025-01-13	13.8455	13.8571	13.8123
2025-02-12	13.8821	13.9492	14.0286
2025-03-13	13.6448	13.6725	13.6624
2025-04-13	13.4983	13.5795	13.5413
2025-05-13	13.6919	13.6242	13.6985
2025-06-13	13.2645	13.3304	12.7184
2025-07-13	13.2564	12.8748	12.9298
2025-08-13	13.3439	13.3865	13.2049
2025-09-13	13.3655	13.3241	13.4564
2025-10-13	13.4832	13.6188	13.7978
2025-11-13	13.3884	13.6638	13.8352
2025-12-13	13.7409	13.8615	13.9053
2026-01-13	13.6516	14.0186	13.9438
2026-02-12	13.7454	13.9	13.9174
2026-03-13	13.4218	13.4911	13.3561
2026-04-13	13.4754	13.554	13.6
2026-05-13	12.5628	13.6109	13.6243
2026-06-13	13.421	13.1519	13.2873
2026-07-13	13.5693	13.6089	13.5809
2026-08-13	11.8575	13.0666	13.3829
2026-09-13	12.764	13.3275	12.9746
2026-10-13	13.6051	13.6889	13.6643
2026-11-13	13.8986	14.1965	14.1301
2026-12-13	13.3822	13.6269	13.9487
2027-01-13	13.8563	14.0535	14.3125
2027-02-12	14.0071	14.169	14.1721
2027-03-13	14.1556	14.0748	13.9897
2027-04-13	13.7966	13.7707	13.6276
2027-05-13	13.9556	13.9582	13.898
2027-06-13	13.5946	13.7477	13.9493
2027-07-13	12.9699	13.2415	13.3975
2027-08-13	13.6316	13.1925	12.8355
2027-09-13	13.7602	13.3328	13.1882
2027-10-13	14.0111	14.216	14.3144
2027-11-13	13.7934	14.1416	14.0726
2027-12-13	13.7268	13.6126	14.0394
2028-01-13	14.0721	14.2475	14.2479
2028-02-12	13.546	13.7896	13.7747
2028-03-12	14.1032	14.0472	14.0567
2028-04-12	13.8376	13.924	13.9475
2028-05-12	13.8751	13.91	13.9392
2028-06-12	13.9549	13.8135	13.8569
2028-07-12	13.9198	13.8045	13.8118
2028-08-12	13.771	13.8008	13.8725
2028-09-12	13.9239	13.6334	13.7386
2028-10-12	14.1014	14.1628	13.8506
2028-11-12	13.4587	14.0307	14.0929
2028-12-12	14.3055	14.6943	14.4738
2029-01-12	14.1008	14.2583	14.1619
2029-02-11	14.0956	14.2445	14.2199
2029-03-12	13.923	13.9248	13.8972
2029-04-12	13.9897	14.126	14.0298
2029-05-12	14.1055	14.0235	13.9813
2029-06-12	14.0065	14.0744	13.9841
2029-07-12	14.0358	13.9083	13.8618
2029-08-12	14.1216	13.4508	13.3898
2029-09-12	13.6455	13.2394	12.9619
2029-10-12	13.5347	13.5821	13.5302
2029-11-12	14.0912	13.2427	13.6097
2029-12-12	13.8964	14.1971	14.3449
2030-01-12	14.0537	14.4842	14.3267
2030-02-11	14.4616	14.4746	14.5506
2030-03-12	14.3989	14.4442	14.4878
2030-04-12	14.3163	14.2542	14.2794
2030-05-12	13.9263	13.6509	13.6002
2030-06-12	13.7593	14.0708	14.2803
2030-07-12	13.6699	13.657	13.2709
2030-08-12	13.6023	13.8618	13.9708
2030-09-12	14.1216	14.4067	14.0195
2030-10-12	12.7911	13.2595	14.1805
2030-11-12	13.5581	13.968	14.1258
2030-12-12	13.9726	14.4938	14.3686
2031-01-12	13.7978	13.7186	14.1204
2031-02-11	14.7465	14.861	14.8704
2031-03-12	14.5655	14.5689	14.5804
2031-04-12	14.2967	14.3598	14.3376
2031-05-12	14.4324	14.1572	14.36
2031-06-12	14.1511	14.0324	13.8758
2031-07-12	13.8668	13.9995	14.163
2031-08-12	13.8858	14.0866	13.6472
2031-09-12	13.9621	13.9022	13.6036
2031-10-12	14.2572	14.5836	14.6042
2031-11-12	14.7205	14.7775	14.6017
2031-12-12	14.1244	14.3185	14.3478
2032-01-12	14.7211	14.5658	14.5481
2032-02-11	14.6072	14.5235	14.5658
2032-03-11	14.7162	14.7303	14.6732
2032-04-11	14.5179	14.4715	14.3333
2032-05-11	13.8872	14.3595	14.3066
2032-06-11	14.2919	14.4056	14.2758
2032-07-11	14.0397	13.8222	14.0682
2032-08-11	14.1434	14.1406	14.1375
2032-09-11	14.1062	13.8055	14.0747
2032-10-11	13.9631	14.4445	14.4424
2032-11-11	14.5006	14.6237	14.6636
2032-12-11	14.4315	14.8243	14.9824
2033-01-11	14.9226	14.9651	15.0427
2033-02-10	13.5637	14.9464	14.942
2033-03-11	14.7375	14.6731	14.7729
2033-04-11	14.3284	14.4908	14.5185
2033-05-11	14.5121	14.5915	14.6024
2033-06-11	14.5027	14.4874	14.6249
2033-07-11	14.0722	14.7098	14.6773
2033-08-11	14.3947	14.4104	14.1536
2033-09-11	14.2282	14.3507	14.4723
2033-10-11	14.6521	14.7738	14.5248
2033-11-11	14.301	14.7801	14.6189
2033-12-11	14.547	15.1154	15.2734
2034-01-11	14.6462	15.1071	15.0944
2034-02-10	14.6224	14.6243	14.0114
2034-03-11	14.7205	14.7681	14.7736
2034-04-11	14.784	14.7198	14.6436
2034-05-11	14.68	14.5464	14.5634
2034-06-11	13.8436	14.2764	14.5375
2034-07-11	13.1083	14.1951	14.5266
2034-08-11	13.5066	14.2145	14.4112
2034-09-11	14.4655	14.3145	14.283
2034-10-11	14.8631	14.9271	14.854
2034-11-11	14.832	14.8227	14.6738
2034-12-11	14.9227	15.1998	15.022
2035-01-11	15.1208	15.3501	15.2904
2035-02-10	15.1174	15.0458	15.139
2035-03-11	14.8882	15.0243	14.9686
2035-04-11	14.8572	14.9223	14.8866
2035-05-11	13.5598	14.8116	14.767
2035-06-11	14.4532	14.5945	14.1446
2035-07-11	14.4759	14.2361	14.4321
2035-08-11	14.1952	14.5058	14.5406
2035-09-11	14.916	14.1066	13.9571
2035-10-11	14.5627	14.7464	14.9089
2035-11-11	14.4384	14.9848	15.146
2035-12-11	14.7385	15.0161	14.9791
2036-01-11	15.0144	14.8372	14.6724
2036-02-10	15.2076	15.4293	15.3604
2036-03-10	15.0493	15.0787	15.1199
2036-04-10	14.7416	14.885	15.0291
2036-05-10	14.2378	14.7262	14.5667
2036-06-10	14.1917	14.3948	14.4752
2036-07-10	15.0815	14.8164	14.6087
2036-08-10	15.0221	14.566	14.4967
2036-09-10	14.0846	14.7609	14.8218
2036-10-10	15.0424	14.439	14.3057
2036-11-10	14.5371	14.9717	15.4252
2036-12-10	14.8454	14.894	14.9934
2037-01-10	15.3919	15.4972	15.5583
2037-02-09	15.437	15.5782	15.4854
2037-03-10	14.8302	15.2935	15.3353
2037-04-10	14.9585	14.9096	14.902
2037-05-10	14.9967	14.9404	14.9156
2037-06-10	15.1892	15.1962	15.0095
2037-07-10	14.8852	14.3097	14.0792
2037-08-10	14.8192	14.6969	14.5431
2037-09-10	14.1686	14.5343	14.5657
2037-10-10	15.1946	15.207	15.2426
2037-11-10	15.1789	15.193	15.3082
2037-12-10	15.2157	15.4123	15.4675
2038-01-10	15.2454	15.3756	15.4152
2038-02-09	15.3794	15.5472	15.3957
2038-03-10	15.1437	15.2447	15.2525
2038-04-10	15.165	14.751	15.0306
2038-05-10	15.2158	15.1307	15.1915
2038-06-10	14.3742	15.0057	15.0514
2038-07-10	14.0383	14.8394	14.8518
2038-08-10	14.4739	13.7326	14.1337
2038-09-10	14.7489	14.9406	15.3123
2038-10-10	14.4965	14.9141	15.0446
2038-11-10	14.859	15.2506	15.3353
2038-12-10	15.2384	15.6681	15.7134
2039-01-10	15.6295	15.7525	15.713
2039-02-09	15.4423	15.5159	15.509
2039-03-10	15.4583	15.4651	15.3681
2039-04-10	15.3345	15.4755	15.3058
2039-05-10	14.9869	15.2254	15.1505
2039-06-10	14.9416	15.1322	15.2009
2039-07-10	14.1398	14.4576	14.6251
2039-08-10	14.696	14.7851	15.0641
2039-09-10	13.8844	14.5377	14.9873
2039-10-10	14.2995	14.8172	15.1587
2039-11-10	15.2529	15.2566	15.3796
2039-12-10	15.0403	15.6385	15.6131
2040-01-10	15.8561	15.8975	16.0038
2040-02-09	15.5915	15.6114	15.6626
2040-03-09	15.6006	15.4959	15.3192
2040-04-09	15.1613	15.1528	15.18
2040-05-09	15.5067	15.4291	15.2655
2040-06-09	14.3931	15.0836	14.981
2040-07-09	13.8263	14.5557	15.1164
2040-08-09	14.8352	15.2518	15.4428
2040-09-09	15.7099	15.3292	15.5088
2040-10-09	15.3283	15.2484	15.4981
2040-11-09	15.4863	15.2958	15.3102
2040-12-09	15.3388	15.6415	15.7755
2041-01-09	15.3605	15.2617	15.5607
2041-02-08	15.8463	15.8772	15.8053
2041-03-09	15.3433	15.5911	15.624
2041-04-09	15.6096	15.6584	15.6585
2041-05-09	15.0463	15.4392	15.4076
2041-06-09	15.5983	15.1764	15.3059
2041-07-09	15.1282	15.085	15.2702
2041-08-09	15.1734	15.204	15.2749
2041-09-09	15.5351	15.3832	15.4228
2041-10-09	14.1218	15.0015	15.1296
2041-11-09	15.4762	15.4435	15.7258
2041-12-09	15.7074	15.8025	16.0067
2042-01-09	15.7621	15.9049	15.8166
2042-02-08	15.7223	15.5277	15.62
2042-03-09	15.7998	15.7359	15.4984
2042-04-09	15.6788	15.7351	15.732
2042-05-09	15.1529	15.4892	15.5444
2042-06-09	15.6815	15.6347	15.4294
2042-07-09	15.7297	15.1715	15.0702
2042-08-09	15.3967	15.3465	15.3396
2042-09-09	15.0739	14.4519	14.1049
2042-10-09	15.385	15.7641	15.7046
2042-11-09	15.3143	16.041	16.1937
2042-12-09	15.5024	15.5024	15.4804
2043-01-09	15.4886	16.046	15.9926
2043-02-08	16.139	16.2574	16.1756
2043-03-09	15.7507	15.9395	15.9477
2043-04-09	15.4105	15.7406	15.5174
2043-05-09	15.7827	15.652	15.779
2043-06-09	15.4079	15.4427	15.7077
2043-07-09	15.3956	14.5239	15.184
2043-08-09	15.6512	15.497	15.3439
2043-09-09	14.9357	15.7187	15.4739
2043-10-09	15.0472	15.3776	15.8802
2043-11-09	15.4117	15.7452	15.7662
2043-12-09	15.7533	16.1074	15.8728
2044-01-09	16.0124	16.238	16.0952
2044-02-08	15.9149	16.1733	16.1264
2044-03-08	15.6545	15.9096	15.7596
2044-04-08	15.9801	15.9165	15.8316
2044-05-08	15.9779	15.8303	15.8179
2044-06-08	15.6259	15.6908	15.775
2044-07-08	15.1394	15.5714	15.2534
2044-08-08	15.5	15.1284	15.008
2044-09-08	15.2288	15.3885	15.7165
2044-10-08	16.1175	16.0518	15.9609
2044-11-08	16.0332	16.2811	16.2469
2044-12-08	15.9236	15.9418	15.9744
2045-01-08	15.8315	15.9002	15.9915
2045-02-07	15.9637	16.0931	16.2128
2045-03-08	16.155	16.2046	16.2209
2045-04-08	16.1392	16.244	16.1542
2045-05-08	15.7329	15.8773	16.1876
2045-06-08	15.607	15.5768	15.6747
2045-07-08	14.4525	15.5462	15.4798
2045-08-08	15.7236	15.7956	15.922
2045-09-08	15.8079	14.9747	15.6086
2045-10-08	16.1867	16.3803	16.402
2045-11-08	15.838	16.409	16.504
2045-12-08	16.5839	16.8574	16.8432
2046-01-08	16.4324	16.5926	16.5499
2046-02-07	16.2123	16.3176	16.3712
2046-03-08	16.0049	16.3203	16.3968
2046-04-08	16.0992	16.0692	16.1109
2046-05-08	16.09	16.0581	15.9649
2046-06-08	16.1494	16.2542	16.2095
2046-07-08	15.9165	15.8271	16.0669
2046-08-08	15.8426	15.9247	15.8657
2046-09-08	16.1639	15.8844	15.9544
2046-10-08	15.8045	16.0741	16.3782
2046-11-08	15.6738	16.5167	16.5956
2046-12-08	15.6731	16.2897	16.325
2047-01-08	16.4381	16.4861	16.516
2047-02-07	16.5336	16.5314	16.6717
2047-03-08	16.3769	16.2753	16.3943
2047-04-08	16.2939	16.3226	16.4104
2047-05-08	15.8149	16.1147	16.0775
2047-06-08	16.1221	16.0642	16.3021
2047-07-08	15.5955	16.0738	15.7676
2047-08-08	15.7864	15.694	15.4902
2047-09-08	16.2117	15.9799	15.4332
2047-10-08	15.7679	15.8597	15.8715
2047-11-08	15.6941	16.1121	16.3092
2047-12-08	16.309	16.1699	16.7385
2048-01-08	16.767	16.938	16.9709
2048-02-07	16.674	16.6973	16.6972
2048-03-07	16.2587	16.429	16.3965
2048-04-07	16.6133	16.5559	16.4013
2048-05-07	16.4341	16.5056	16.4233
2048-06-07	16.236	16.3498	16.3056
2048-07-07	15.975	15.9997	15.9547
2048-08-07	15.2499	15.7848	16.08
2048-09-07	16.4881	16.1688	16.3664
2048-10-07	16.8311	16.7603	16.4554
2048-11-07	16.2558	16.1562	16.4467
2048-12-07	16.5674	16.7021	16.826
2049-01-07	16.7201	16.7177	16.7518
2049-02-06	16.6598	16.7834	16.8404
2049-03-07	16.623	16.7075	16.6021
2049-04-07	16.2916	16.3496	16.5025
2049-05-07	16.6286	16.5039	16.2033
2049-06-07	15.968	16.0201	16.3169
2049-07-07	15.4573	15.9094	16.1244
2049-08-07	16.0301	16.0396	15.8485
2049-09-07	16.0414	16.4378	16.547
2049-10-07	16.0599	16.6195	16.7447
2049-11-07	16.7149	17.0319	16.9606
2049-12-07	16.7357	17.1013	17.0875
2050-01-07	16.8291	16.9847	16.918
2050-02-06	17.0419	17.1017	17.0332
2050-03-07	16.7479	16.7865	16.7257
2050-04-07	16.6891	16.5305	16.62
2050-05-07	16.8275	16.6842	16.7752
2050-06-07	16.2098	16.6732	16.6103
2050-07-07	16.4493	16.1371	16.4745
2050-08-07	15.9639	16.1244	16.3498
2050-09-07	16.1492	16.4872	16.6205
2050-10-07	16.4156	16.8555	16.7842
2050-11-07	16.265	16.6452	16.8471
2050-12-07	16.509	16.9919	16.984
2051-01-07 12:00:00	17.1229	17.2287	17.2591
2051-02-06	16.9917	17.0173	17.0574
2051-03-07 12:00:00	16.8466	16.7318	16.945
2051-04-07	16.7182	16.764	16.7451
2051-05-07 12:00:00	17.0048	16.7873	16.8441
2051-06-07	16.3299	16.5381	16.3087
2051-07-07 12:00:00	16.1304	16.5217	16.4426
2051-08-07 12:00:00	15.4509	15.6698	15.7229
2051-09-07	16.3839	16.6686	16.5242
2051-10-07 12:00:00	17.1248	16.9479	17.1614
2051-11-07	16.66	16.7285	16.5475
2051-12-07 12:00:00	17.0456	17.3319	17.4374
2052-01-07 12:00:00	16.9109	17.1943	17.2485
2052-02-06	17.1402	17.2206	17.2487
2052-03-06 12:00:00	17.1659	17.2516	17.2463
2052-04-06	16.9205	17.0795	16.9813
2052-05-06 12:00:00	16.5249	16.7616	16.9271
2052-06-06	16.4714	17.1311	17.0319
2052-07-06 12:00:00	16.6715	16.917	16.8199
2052-08-06 12:00:00	16.6315	16.2181	16.2395
2052-09-06	16.599	16.6474	16.6054
2052-10-06 12:00:00	17.173	17.1601	17.1446
2052-11-06	16.7667	17.0651	17.1112
2052-12-06 12:00:00	17.262	17.5801	17.5297
2053-01-06 12:00:00	17.0494	17.3742	17.2877
2053-02-05	17.0949	17.3061	17.2652
2053-03-06 12:00:00	16.9771	17.1508	17.1276
2053-04-06	16.8076	17.0911	17.1012
2053-05-06 12:00:00	16.8567	16.9078	17.2416
2053-06-06	16.345	16.7671	16.9526
2053-07-06 12:00:00	16.8272	16.7574	17.2634
2053-08-06 12:00:00	16.5741	16.5633	16.6035
2053-09-06	16.9596	16.8546	17.0168
2053-10-06 12:00:00	16.892	16.8365	16.4039
2053-11-06	16.4539	17.192	17.3505
2053-12-06 12:00:00	16.5782	17.2514	17.2404
2054-01-06 12:00:00	17.2642	17.4367	17.3622
2054-02-05	17.3242	17.2953	17.3404
2054-03-06 12:00:00	16.9368	17.3469	17.3007
2054-04-06	17.2171	17.0554	16.954
2054-05-06 12:00:00	16.7126	17.0358	16.9225
2054-06-06	16.9381	16.3306	16.761
2054-07-06 12:00:00	16.2193	16.9346	17.0517
2054-08-06 12:00:00	16.0477	16.6758	16.7701
2054-09-06	17.0921	16.9774	16.963
2054-10-06 12:00:00	16.7606	16.6247	16.708
2054-11-06	17.2588	17.1454	17.0148
2054-12-06 12:00:00	16.8783	17.3318	17.3583
2055-01-06 12:00:00	17.2417	17.5593	17.6283
2055-02-05	17.1813	17.4903	17.6399
2055-03-06 12:00:00	17.552	17.4374	17.4753
2055-04-06	17.2001	17.1839	17.2257
2055-05-06 12:00:00	17.0272	17.3042	17.1633
2055-06-06	17.0044	17.1166	17.1233
2055-07-06 12:00:00	16.7346	16.9684	16.8729
2055-08-06 12:00:00	16.9034	16.6287	16.5188
2055-09-06	16.6393	16.4137	16.5434
2055-10-06 12:00:00	17.652	17.6248	17.5495
2055-11-06	16.7108	16.5059	17.0285
2055-12-06 12:00:00	17.4834	17.8717	17.8582
2056-01-06 12:00:00	17.571	17.736	17.7241
2056-02-05	17.5498	17.7348	17.6287
2056-03-05 12:00:00	17.3481	17.6397	17.6525
2056-04-05	17.6061	17.5816	17.5288
2056-05-05 12:00:00	17.4477	17.3139	17.2805
2056-06-05	17.0054	17.2738	17.4799
2056-07-05 12:00:00	17.3583	17.2161	16.782
2056-08-05 12:00:00	17.2467	17.0477	17.0461
2056-09-05	17.6158	17.4872	17.5653
2056-10-05 12:00:00	17.449	17.6735	17.5584
2056-11-05	17.2488	17.7571	17.6962
2056-12-05 12:00:00	17.386	17.6435	17.771
2057-01-05 12:00:00	17.8495	17.9115	17.9912
2057-02-04	17.6671	17.7115	17.8434
2057-03-05 12:00:00	17.6319	17.6529	17.4414
2057-04-05	16.4618	17.362	17.4453
2057-05-05 12:00:00	16.4433	17.4504	17.2693
2057-06-05	17.4913	17.3994	17.5332
2057-07-05 12:00:00	16.8044	17.3467	17.32
2057-08-05 12:00:00	16.9164	16.9955	16.9133
2057-09-05	16.9527	17.0397	17.1814
2057-10-05 12:00:00	17.5882	17.696	17.705
2057-11-05	17.5733	17.5086	17.5635
2057-12-05 12:00:00	17.6665	17.8438	18.0479
2058-01-05 12:00:00	17.8071	18.154	18.1907
2058-02-04	17.8024	17.9112	17.9346
2058-03-05 12:00:00	17.4694	17.5923	17.527
2058-04-05	17.2036	17.6248	17.5944
2058-05-05 12:00:00	17.1037	17.284	17.2949
2058-06-05	17.1001	17.5673	17.1888
2058-07-05 12:00:00	16.5054	17.2149	17.0228
2058-08-05 12:00:00	17.773	17.6728	17.2312
2058-09-05	17.263	17.4403	17.471
2058-10-05 12:00:00	17.4818	17.0705	17.447
2058-11-05	17.5114	17.5892	17.6614
2058-12-05 12:00:00	18.0597	18.141	18.2265
2059-01-05 12:00:00	17.5746	17.6375	17.7731
2059-02-04	17.8453	17.8819	17.7953
2059-03-05 12:00:00	18.0183	17.9998	18.0084
2059-04-05	17.7903	17.6942	17.7773
2059-05-05 12:00:00	17.8973	17.6746	17.8399
2059-06-05	17.2144	17.4886	17.331
2059-07-05 12:00:00	17.0965	17.4544	17.4325
2059-08-05 12:00:00	16.7651	17.2759	17.4136
2059-09-05	17.3018	17.869	17.9254
2059-10-05 12:00:00	17.8391	18.002	17.8017
2059-11-05	17.7073	17.7976	18.0327
2059-12-05 12:00:00	18.2451	18.3184	18.3675
2060-01-05 12:00:00	17.9496	18.2192	18.2418
2060-02-04	18.0902	17.9783	17.9631
2060-03-04 12:00:00	17.8125	17.961	17.9292
2060-04-04	17.8948	17.9399	17.9465
2060-05-04 12:00:00	18.1044	18.0096	17.8687
2060-06-04	17.7886	17.7925	17.8831
2060-07-04 12:00:00	17.8306	17.7985	17.7725
2060-08-04 12:00:00	17.6379	17.2926	17.2817
2060-09-04	17.9544	17.9782	17.9107
2060-10-04 12:00:00	17.7655	17.8899	17.924
2060-11-04	17.2505	18.0533	18.2468
2060-12-04 12:00:00	17.6358	18.1911	18.2245
2061-01-04 12:00:00	18.1112	17.9535	18.2683
2061-02-03	18.1733	18.1849	18.1554
2061-03-04 12:00:00	18.009	18.2133	18.224
2061-04-04	17.8625	17.9306	17.8121
2061-05-04 12:00:00	17.8575	17.8041	18.0516
2061-06-04	17.6928	17.8023	17.7707
2061-07-04 12:00:00	17.0212	16.9526	17.2695
2061-08-04 12:00:00	17.2264	17.576	17.7484
2061-09-04	17.8951	17.9062	17.842
2061-10-04 12:00:00	16.9416	17.9871	18.2507
2061-11-04	17.7782	18.0815	18.1609
2061-12-04 12:00:00	18.2644	18.3991	18.3166
2062-01-04 12:00:00	18.471	18.6535	18.6402
2062-02-03	18.2307	18.4548	18.4589
2062-03-04 12:00:00	18.0528	18.2547	18.2754
2062-04-04	18.0072	18.2306	18.151
2062-05-04 12:00:00	17.8152	18.1085	18.0972
2062-06-04	17.9771	18.0863	18.0423
2062-07-04 12:00:00	18.1116	18.1289	18.1299
2062-08-04 12:00:00	17.3963	17.3447	17.327
2062-09-04	17.5177	17.8095	17.7021
2062-10-04 12:00:00	17.8448	17.2455	17.707
2062-11-04	18.0214	18.1074	17.9516
2062-12-04 12:00:00	18.229	18.3318	18.3924
2063-01-04 12:00:00	18.2942	18.1474	18.4701
2063-02-03	18.5178	18.6119	18.5665
2063-03-04 12:00:00	18.4015	18.3778	18.4467
2063-04-04	18.1104	17.942	18.0559
2063-05-04 12:00:00	18.1368	18.2758	18.1803
2063-06-04	18.191	17.5237	17.9097
2063-07-04 12:00:00	17.6895	17.8277	17.2156
2063-08-04 12:00:00	17.9716	17.8	17.1078
2063-09-04	17.9173	17.9958	17.9116
2063-10-04 12:00:00	18.3366	17.799	18.0247
2063-11-04	17.8109	18.0331	17.8763
2063-12-04 12:00:00	18.315	18.4995	18.5259
2064-01-04 12:00:00	18.3544	18.501	18.6635
2064-02-03	18.5372	18.7401	18.6929
2064-03-03 12:00:00	18.4327	18.5598	18.5837
2064-04-03	18.0015	17.9804	18.0256
2064-05-03 12:00:00	18.0496	18.3762	18.3131
2064-06-03	18.0462	18.1552	18.1974
2064-07-03 12:00:00	17.9504	17.8294	18.0426
2064-08-03 12:00:00	17.7724	16.7436	17.3059
2064-09-03	18.2764	18.3076	18.1695
2064-10-03 12:00:00	18.2233	18.6344	18.6943
2064-11-03	17.9559	18.3865	18.3312
2064-12-03 12:00:00	18.8177	18.9602	18.9509
2065-01-03 12:00:00	18.5661	18.7663	18.6098
2065-02-02	18.7135	18.7586	18.7894
2065-03-03 12:00:00	18.4365	18.4694	18.5296
2065-04-03	18.5464	18.5212	18.4975
2065-05-03 12:00:00	18.3714	18.4708	18.5808
2065-06-03	18.3759	18.515	18.6064
2065-07-03 12:00:00	18.4542	18.2701	18.3108
2065-08-03 12:00:00	18.4788	18.4344	18.3017
2065-09-03	18.1736	17.6862	17.8017
2065-10-03 12:00:00	17.8844	18.3408	18.5388
2065-11-03	18.4666	18.7144	18.6867
2065-12-03 12:00:00	18.4418	18.4857	18.726
2066-01-03 12:00:00	18.7242	18.6991	18.7159
2066-02-02	18.8253	18.8668	18.7334
2066-03-03 12:00:00	18.5447	18.6691	18.7037
2066-04-03	18.5483	18.5289	18.4335
2066-05-03 12:00:00	18.2098	18.3664	18.4887
2066-06-03	18.2125	18.4129	18.5535
2066-07-03 12:00:00	18.1682	17.9866	18.452
2066-08-03 12:00:00	17.7797	17.708	18.4874
2066-09-03	18.2884	18.2357	18.4666
2066-10-03 12:00:00	18.2472	17.9519	18.5894
2066-11-03	18.6874	19.0601	19.1044
2066-12-03 12:00:00	18.1038	18.8806	18.9002
2067-01-03 12:00:00	19.0109	19.1082	19.1194
2067-02-02	19.0101	18.9923	18.9581
2067-03-03 12:00:00	18.8151	18.8311	18.8146
2067-04-03	18.6225	18.5739	18.4021
2067-05-03 12:00:00	18.3783	18.5608	18.5959
2067-06-03	18.3632	18.5489	18.7671
2067-07-03 12:00:00	17.0389	18.1667	18.0391
2067-08-03 12:00:00	18.3525	18.3949	18.4811
2067-09-03	18.8073	18.8168	18.9245
2067-10-03 12:00:00	17.7443	18.0742	18.4469
2067-11-03	18.7325	18.8727	18.9078
2067-12-03 12:00:00	18.0209	18.5996	18.7426
2068-01-03 12:00:00	17.991	18.9657	18.9808
2068-02-02	19.08	19.0742	19.105
2068-03-02 12:00:00	18.9737	18.9604	18.985
2068-04-02	18.7033	18.8394	18.5171
2068-05-02 12:00:00	18.1151	18.5589	18.3727
2068-06-02	18.7811	18.8905	19.0717
2068-07-02 12:00:00	18.945	18.7629	18.5374
2068-08-02 12:00:00	17.6085	17.9935	18.376
2068-09-02	17.6653	18.6736	18.156
2068-10-02 12:00:00	18.8161	18.812	18.8625
2068-11-02	18.8552	19.1674	19.0939
2068-12-02 12:00:00	18.2675	18.6494	18.906
2069-01-02 12:00:00	18.3556	17.9027	18.3548
2069-02-01	18.9093	19.0999	19.0239
2069-03-02 12:00:00	19.0698	19.1012	18.9697
2069-04-02	18.9961	18.9716	18.9011
2069-05-02 12:00:00	18.8384	18.8108	18.9987
2069-06-02	17.6935	18.6764	18.5847
2069-07-02 12:00:00	16.8897	17.8707	18.1166
2069-08-02 12:00:00	18.2067	18.8398	18.7248
2069-09-02	18.5037	18.4666	18.171
2069-10-02 12:00:00	18.0844	18.4609	18.3517
2069-11-02	18.9925	19.3094	19.3925
2069-12-02 12:00:00	18.9687	19.3838	19.5119
2070-01-02 12:00:00	19.3485	19.4032	19.4276
2070-02-01	19.1202	19.1423	19.1407
2070-03-02 12:00:00	19.1968	19.2304	19.1646
2070-04-02	19.0054	18.8737	18.7301
2070-05-02 12:00:00	18.3408	18.9581	18.9515
2070-06-02	16.6962	18.4706	18.3631
2070-07-02 12:00:00	18.6963	18.697	17.8795
2070-08-02 12:00:00	17.6873	18.0798	18.0469
2070-09-02	18.6692	18.9294	18.9594
2070-10-02 12:00:00	19.2604	18.8102	19.114
2070-11-02	19.3095	19.3068	19.1699
2070-12-02 12:00:00	19.1418	19.3218	19.4672
2071-01-02 12:00:00	18.9966	19.2053	19.2859
2071-02-01	19.5199	19.4883	19.3954
2071-03-02 12:00:00	19.4222	19.4831	19.4673
2071-04-02	19.2712	19.3134	19.2861
2071-05-02 12:00:00	19.0191	19.2346	19.0639
2071-06-02	18.7415	19.0899	19.035
2071-07-02 12:00:00	17.9033	18.8889	18.5082
2071-08-02 12:00:00	18.8338	19.0846	19.0676
2071-09-02	19.2241	18.8903	18.8953
2071-10-02 12:00:00	19.1898	19.2227	18.9256
2071-11-02	19.0074	19.1353	19.1455
2071-12-02 12:00:00	18.9003	19.4258	19.5507
2072-01-02 12:00:00	19.4872	19.6439	19.6612
2072-02-01	19.4993	19.6262	19.7053
2072-03-01 12:00:00	19.355	19.3884	19.2908
2072-04-01	18.7531	19.055	19.1841
2072-05-01 12:00:00	18.5211	18.9599	19.117
2072-06-01	19.4506	19.4019	19.3952
2072-07-01 12:00:00	19.1153	19.2407	19.0824
2072-08-01 12:00:00	19.1324	19.064	18.8903
2072-09-01	18.7847	18.5478	18.3653
2072-10-01 12:00:00	19.4588	19.2759	19.3692
2072-11-01	19.5096	19.5874	19.7085
2072-12-01 12:00:00	19.7486	19.8232	19.6996
2073-01-01 12:00:00	19.4752	19.6297	19.6664
2073-01-31	19.6011	19.6613	19.6444
2073-03-01 12:00:00	18.8992	19.3867	19.5262
2073-04-01	19.3634	19.4162	19.3369
2073-05-01 12:00:00	19.3663	19.3392	19.302
2073-06-01	18.9765	19.451	19.6058
2073-07-01 12:00:00	18.5831	18.6062	17.5982
2073-08-01 12:00:00	19.5078	18.0706	18.8845
2073-09-01	18.8122	19.1262	18.9424
2073-10-01 12:00:00	19.0584	18.8074	19.4799
2073-11-01	19.2805	19.4886	19.3072
2073-12-01 12:00:00	19.6452	19.8356	19.8564
2074-01-01 12:00:00	19.3765	19.6563	19.8402
2074-01-31	19.8596	19.9017	19.8511
2074-03-01 12:00:00	19.5389	19.5431	19.6698
2074-04-01	19.6964	19.3734	19.5169
2074-05-01 12:00:00	19.1118	19.52	19.5601
2074-06-01	17.8802	19.134	18.7301
2074-07-01 12:00:00	19.2794	18.9606	19.1467
2074-08-01 12:00:00	18.3968	18.9171	18.5313
2074-09-01	19.4939	19.5553	19.2178
2074-10-01 12:00:00	19.5828	19.669	19.5205
2074-11-01	19.0332	19.509	19.6404
2074-12-01 12:00:00	19.7457	19.9906	20.0649
2075-01-01 12:00:00	19.8417	19.9525	20.0044
2075-01-31	19.8872	19.9433	19.9056
2075-03-01 12:00:00	19.8023	19.8516	19.8127
2075-04-01	19.6245	19.6451	19.573
2075-05-01 12:00:00	19.3687	19.5136	19.4575
2075-06-01	19.6601	19.7209	19.7187
2075-07-01 12:00:00	18.661	19.3369	19.6103
2075-08-01 12:00:00	19.0905	19.6244	19.2577
2075-09-01	19.1621	19.4231	19.4092
2075-10-01 12:00:00	19.5083	19.7923	19.8529
2075-11-01	19.5238	19.6577	19.7458
2075-12-01 12:00:00	19.7193	20.0325	20.1639
2076-01-01 12:00:00	19.7758	19.9275	19.9898
2076-01-31	19.8456	19.9267	20.0021
2076-02-29 12:00:00	19.4624	19.6865	19.6322
2076-03-31	19.7406	19.6143	19.6238
2076-04-30 12:00:00	19.2432	19.6501	19.5449
2076-05-31	19.4122	19.3142	19.4295
2076-06-30 12:00:00	19.4708	19.7103	19.4505
2076-07-31 12:00:00	19.0483	19.0568	18.852
2076-08-31	19.2786	19.2809	19.1287
2076-09-30 12:00:00	19.5166	18.7082	19.4261
2076-10-31	19.9783	20.0744	20.0899
2076-11-30 12:00:00	19.7406	19.8731	20.0176
2076-12-31 12:00:00	19.8831	19.969	20.0328
2077-01-30	19.9592	19.8552	20.025
2077-02-28 12:00:00	19.6971	19.9329	19.8875
2077-03-31	19.9716	20.0093	20.0165
2077-04-30 12:00:00	19.7427	19.7402	19.6143
2077-05-31	19.8593	19.7889	19.9609
2077-06-30 12:00:00	19.8125	19.4887	19.4571
2077-07-31 12:00:00	19.6608	19.6707	19.6731
2077-08-31	19.7366	19.645	19.8321
2077-09-30 12:00:00	19.8344	19.7895	19.5705
2077-10-31	19.8671	19.6429	19.7397
2077-11-30 12:00:00	19.9276	20.1312	20.0766
2077-12-31 12:00:00	19.6762	20.1235	20.0692
2078-01-30	19.9821	19.7802	19.9619
2078-02-28 12:00:00	19.9296	19.9315	19.8301
2078-03-31	19.9942	19.9579	19.8915
2078-04-30 12:00:00	19.6165	19.8787	19.8462
2078-05-31	18.5633	19.2148	18.9719
2078-06-30 12:00:00	19.5834	19.7491	19.3342
2078-07-31 12:00:00	18.5014	18.8195	18.555
2078-08-31	19.3139	18.5723	17.7012
2078-09-30 12:00:00	18.8058	19.823	19.8733
2078-10-31	19.8102	20.1723	20.2127
2078-11-30 12:00:00	20.0354	20.1632	20.2629
2078-12-31 12:00:00	20.2745	20.4083	20.4655
2079-01-30	20.1877	20.1189	20.1981
2079-02-28 12:00:00	20.0121	19.9778	20.0732
2079-03-31	19.8448	20.0125	19.8854
2079-04-30 12:00:00	18.9576	19.8261	19.7432
2079-05-31	20.108	19.9462	19.9648
2079-06-30 12:00:00	19.5087	19.9056	19.8157
2079-07-31 12:00:00	18.9818	19.2909	19.4258
2079-08-31	19.9064	20.0569	19.9838
2079-09-30 12:00:00	19.9661	19.7697	20.0367
2079-10-31	19.663	19.8898	20.2426
2079-11-30 12:00:00	19.906	20.0058	19.8569
2079-12-31 12:00:00	20.2626	20.3046	20.3589
2080-01-30	19.947	19.9918	20.3089
2080-02-28 12:00:00	20.0695	20.1563	20.1618
2080-03-30	19.9704	20.0599	20.0038
2080-04-29 12:00:00	19.83	20.0974	19.9955
2080-05-30	19.6499	19.8901	19.5453
2080-06-29 12:00:00	19.8364	20.029	19.9035
2080-07-30 12:00:00	19.3599	19.282	19.4261
2080-08-30	16.109	19.8697	19.711
2080-09-29 12:00:00	20.1784	19.8622	19.9662
2080-10-30	19.7482	20.1367	20.3171
2080-11-29 12:00:00	20.1441	20.4043	20.6022
2080-12-30 12:00:00	19.9564	20.2283	20.3945
2081-01-29	20.3572	20.316	20.358
2081-02-27 12:00:00	20.0922	20.246	20.181
2081-03-30	20.3052	20.2551	20.2736
2081-04-29 12:00:00	20.2466	20.1436	20.1396
2081-05-30	19.9346	19.1858	19.4773
2081-06-29 12:00:00	19.8364	20.1722	19.9228
2081-07-30 12:00:00	19.4516	19.6238	19.9401
2081-08-30	19.8385	19.9192	19.4609
2081-09-29 12:00:00	19.9824	20.0685	20.1579
2081-10-30	18.6965	18.9409	19.9179
2081-11-29 12:00:00	19.8764	20.4413	20.5531
2081-12-30 12:00:00	20.2682	20.4241	20.5168
2082-01-29	20.1906	20.1921	20.3458
2082-02-27 12:00:00	20.347	20.4011	20.4661
2082-03-30	20.3015	20.2363	20.1614
2082-04-29 12:00:00	20.1906	20.3592	20.2134
2082-05-30	18.5497	20.1411	20.232
2082-06-29 12:00:00	19.4234	19.7959	19.7021
2082-07-30 12:00:00	20.017	19.6575	19.8377
2082-08-30	19.6111	20.0074	20.2395
2082-09-29 12:00:00	20.18	20.4055	19.955
2082-10-30	19.9833	20.3526	20.2836
2082-11-29 12:00:00	20.4511	20.6506	20.5848
2082-12-30 12:00:00	20.086	20.5903	20.6038
2083-01-29	20.2681	20.4772	20.4927
2083-02-27 12:00:00	20.5073	20.4805	20.4544
2083-03-30	20.4484	20.2303	20.446
2083-04-29 12:00:00	20.2454	20.3514	20.2769
2083-05-30	19.6404	20.1089	20.3169
2083-06-29 12:00:00	18.1683	20.0268	20.3902
2083-07-30 12:00:00	19.715	19.664	19.96
2083-08-30	19.6463	20.1293	20.1081
2083-09-29 12:00:00	20.5006	20.5562	20.5192
2083-10-30	19.8315	20.5505	20.1672
2083-11-29 12:00:00	20.1233	20.5894	20.7742
2083-12-30 12:00:00	20.3339	20.5714	20.6704
2084-01-29	20.4159	20.4785	20.4032
2084-02-27 12:00:00	20.4831	20.6946	20.7915
2084-03-29	20.2043	20.3139	20.3658
2084-04-28 12:00:00	20.2817	19.8885	20.1069
2084-05-29	20.0009	20.1352	20.1087
2084-06-28 12:00:00	19.4606	19.9365	19.4854
2084-07-29 12:00:00	20.4797	20.3639	20.2064
2084-08-29	20.1637	20.0209	20.4213
2084-09-28 12:00:00	19.269	20.095	20.333
2084-10-29	20.4596	20.4204	20.7115
2084-11-28 12:00:00	20.2329	20.7358	20.9184
2084-12-29 12:00:00	20.4453	20.6162	20.7538
2085-01-28	20.5455	20.5321	20.6808
2085-02-26 12:00:00	20.5872	20.5782	20.6059
2085-03-29	19.8771	20.4606	20.4014
2085-04-28 12:00:00	20.5486	20.555	20.4242
2085-05-29	18.9519	20.1341	20.0942
2085-06-28 12:00:00	20.1826	20.4737	20.3986
2085-07-29 12:00:00	20.2874	20.1082	19.6336
2085-08-29	20.355	20.4034	20.3052
2085-09-28 12:00:00	20.5307	20.6026	20.4062
2085-10-29	20.6826	20.6451	20.8312
2085-11-28 12:00:00	20.009	20.5287	20.5849
2085-12-29 12:00:00	20.7122	20.8023	20.6226
2086-01-28	20.7774	20.8222	20.738
2086-02-26 12:00:00	20.3471	20.5246	20.4971
2086-03-29	20.4298	20.5442	20.4572
2086-04-28 12:00:00	19.9058	20.219	20.3554
2086-05-29	19.8105	20.2729	20.1712
2086-06-28 12:00:00	19.596	20.2077	20.3817
2086-07-29 12:00:00	20.339	20.4186	20.4543
2086-08-29	20.4264	20.2027	20.4651
2086-09-28 12:00:00	20.396	20.4529	20.458
2086-10-29	20.8296	20.7735	20.9139
2086-11-28 12:00:00	20.4914	20.722	20.7858
2086-12-29 12:00:00	20.8016	20.9009	20.8648
2087-01-28	20.7201	20.8664	20.8273
2087-02-26 12:00:00	20.9576	20.9327	20.9904
2087-03-29	20.5723	20.6351	20.5248
2087-04-28 12:00:00	20.189	20.5387	20.5562
2087-05-29	20.8485	20.7686	20.8524
2087-06-28 12:00:00	20.5281	20.4161	20.1792
2087-07-29 12:00:00	19.4341	19.9322	20.0301
2087-08-29	20.7494	20.4994	20.5291
2087-09-28 12:00:00	20.7817	20.8	20.5924
2087-10-29	20.6206	20.7887	20.7511
2087-11-28 12:00:00	20.4605	21.0282	21.0956
2087-12-29 12:00:00	20.2382	20.5789	20.7636
2088-01-28	20.7902	20.8917	20.8952
2088-02-26 12:00:00	20.6467	20.8455	20.78
2088-03-28	20.1399	20.6718	20.6203
2088-04-27 12:00:00	20.7971	20.7858	20.8157
2088-05-28	20.5134	20.7251	20.6411
2088-06-27 12:00:00	19.59	20.2743	20.4303
2088-07-28 12:00:00	20.4459	20.2272	20.5375
2088-08-28	20.8194	20.7672	20.9006
2088-09-27 12:00:00	20.6176	20.1885	20.4368
2088-10-28	20.707	20.8422	20.8795
2088-11-27 12:00:00	21.0295	21.0543	21.0967
2088-12-28 12:00:00	20.9041	21.0264	21.091
2089-01-27	21.1287	21.1646	21.1564
2089-02-25 12:00:00	20.6817	20.8164	20.7087
2089-03-28	20.9424	20.9218	20.8821
2089-04-27 12:00:00	20.7438	20.7877	20.8143
2089-05-28	20.8709	20.7816	20.5464
2089-06-27 12:00:00	18.9132	20.1582	19.6184
2089-07-28 12:00:00	20.164	20.5334	19.9929
2089-08-28	20.4055	20.5843	20.4326
2089-09-27 12:00:00	20.8958	20.8469	20.7297
2089-10-28	20.5897	20.8672	20.7841
2089-11-27 12:00:00	20.6891	20.9155	21.0914
2089-12-28 12:00:00	21.0017	20.9585	21.0607
2090-01-27	20.974	20.9507	20.8688
2090-02-25 12:00:00	20.6932	20.6595	20.8813
2090-03-28	20.6682	20.637	20.7092
2090-04-27 12:00:00	20.9494	20.8973	20.8861
2090-05-28	20.026	20.4742	20.714
2090-06-27 12:00:00	20.3926	20.5158	20.6177
2090-07-28 12:00:00	19.4703	19.7436	20.1693
2090-08-28	20.5481	20.816	20.7804
2090-09-27 12:00:00	20.9064	20.5754	20.7154
2090-10-28	20.8761	20.8994	20.8248
2090-11-27 12:00:00	20.4538	20.8025	21.2632
2090-12-28 12:00:00	21.2227	21.0742	21.2637
2091-01-27	20.9779	20.9583	21.143
2091-02-25 12:00:00	21.0581	21.1456	21.062
2091-03-28	21.071	21.0993	21.1981
2091-04-27 12:00:00	20.8737	20.5093	20.6937
2091-05-28	20.5577	20.758	21.0415
2091-06-27 12:00:00	20.4444	20.5738	20.8008
2091-07-28 12:00:00	20.4473	20.7822	20.7796
2091-08-28	20.4255	20.0196	19.4143
2091-09-27 12:00:00	20.2708	20.6555	21.0567
2091-10-28	20.9458	21.1121	21.1906
2091-11-27 12:00:00	20.4082	20.8913	21.1838
2091-12-28 12:00:00	21.2217	21.1616	21.1747
2092-01-27	21.0262	21.1549	21.1017
2092-02-25 12:00:00	21.1741	21.1639	21.1819
2092-03-27	21.0202	21.0734	20.9791
2092-04-26 12:00:00	20.6607	20.912	20.8571
2092-05-27	20.7692	20.9055	21.0122
2092-06-26 12:00:00	20.4198	20.2818	20.4968
2092-07-27 12:00:00	20.5529	20.9455	20.9448
2092-08-27	19.6674	20.0669	19.7956
2092-09-26 12:00:00	20.2866	20.846	20.7155
2092-10-27	20.8292	21.1371	21.3328
2092-11-26 12:00:00	20.855	20.7271	21.2849
2092-12-27 12:00:00	20.863	20.9669	21.1128
2093-01-26	19.8258	21.1238	21.2733
2093-02-24 12:00:00	21.1685	21.2896	21.3272
2093-03-27	21.1389	21.0757	21.0872
2093-04-26 12:00:00	21.0833	20.8957	21.1495
2093-05-27	20.6003	20.9271	20.7162
2093-06-26 12:00:00	20.0148	20.1017	19.8445
2093-07-27 12:00:00	20.599	20.8978	20.8677
2093-08-27	20.5712	20.1386	20.1559
2093-09-26 12:00:00	21.1784	21.2892	21.1849
2093-10-27	21.0749	20.9935	20.9039
2093-11-26 12:00:00	20.9451	21.1501	21.2163
2093-12-27 12:00:00	21.2825	21.3456	21.566
2094-01-26	21.1664	21.1821	21.2436
2094-02-24 12:00:00	21.1987	21.2495	21.1682
2094-03-27	21.2262	21.1869	21.1784
2094-04-26 12:00:00	20.873	21.0795	21.0739
2094-05-27	21.1146	21.2132	21.2981
2094-06-26 12:00:00	19.9548	19.7138	20.329
2094-07-27 12:00:00	20.6419	20.803	20.2188
2094-08-27	20.9267	20.8841	20.275
2094-09-26 12:00:00	21.0678	20.9078	20.5623
2094-10-27	20.9171	20.7313	21.283
2094-11-26 12:00:00	20.7517	21.4292	21.5737
2094-12-27 12:00:00	21.4011	21.5887	21.5714
2095-01-26	21.2031	21.2007	21.3422
2095-02-24 12:00:00	21.1784	21.1897	21.1369
2095-03-27	21.218	21.2494	21.1743
2095-04-26 12:00:00	21.2468	20.9968	21.1343
2095-05-27	20.9198	21.0442	21.1191
2095-06-26 12:00:00	20.6908	20.9504	21.1207
2095-07-27 12:00:00	20.5251	21.1528	21.306
2095-08-27	20.6118	20.6308	20.3274
2095-09-26 12:00:00	20.5496	20.7846	20.6281
2095-10-27	20.6635	20.9402	20.9626
2095-11-26 12:00:00	21.3078	21.2405	21.359
2095-12-27 12:00:00	21.0124	20.8171	21.4513
2096-01-26	21.441	21.3271	21.4193
2096-02-24 12:00:00	21.3584	21.5064	21.5217
2096-03-26	21.2376	21.1736	21.0585
2096-04-25 12:00:00	21.198	21.2213	21.2984
2096-05-26	21.0825	20.8264	20.9438
2096-06-25 12:00:00	20.0137	20.8156	20.7876
2096-07-26 12:00:00	20.2473	20.9155	20.6822
2096-08-26	21.3597	21.0605	21.0405
2096-09-25 12:00:00	21.0957	20.833	20.7316
2096-10-26	21.4415	21.1187	21.3208
2096-11-25 12:00:00	21.3143	21.3558	21.4966
2096-12-26 12:00:00	21.5416	21.5902	21.632
2097-01-25	21.5996	21.5746	21.4639
2097-02-23 12:00:00	21.5173	21.5154	21.5463
2097-03-26	21.4306	21.1321	21.1777
2097-04-25 12:00:00	20.7798	21.1929	21.2393
2097-05-26	21.1025	21.2117	21.1866
[truncated: 30 more rows]

[truncated: 4 more sheets: Table SF10, Table SF11, Table SF12, Table SF13]
